# Supplementary material for: Tibetan tea consumption prevents obesity by modulating the cellular composition and metabolic reprogramming of white adipose tissue
Source: Royal Society of Chemistry journal article supplement (doi:10.1039/d3fo03506a), 2023-11-16
Supplement: d3fo03506a1.pdf [file d3fo03506a1.pdf]

**Fig. S1** Phenotypic changes after Tibetan tea consumption. (a) Bar graph showing weight changes in BAT, WAT, and liver. (b) H&E staining of BAT and liver. Scale bars, 100  $\mu$ m.

**Fig. S2** Changes in WAT cellular composition during obesity. (a) Violin plot showing marker genes for each cell type. (b) UMAP visualization was used to display the cells selected by Scissor, with the Scissor<sup>+</sup> and Scissor<sup>-</sup> cells associated with HW and CW phenotypes represented by red and blue dots, respectively. (c) A bar plot was employed to present a detailed depiction of the phenotypic composition of these Scissor-selected cells.
