# Supplementary material for: Tibetan tea consumption prevents obesity by modulating the cellular composition and metabolic reprogramming of white adipose tissue
Source: Royal Society of Chemistry journal article supplement (doi:10.1039/d3fo03506a), 2023-11-16
Supplement: d3fo03506a5.xlsx [file d3fo03506a5.xlsx]

## Sheet: Obesity upregulated
TF	gene	highConfAnnot	nMotifs	bestMotif	NES	motifDb	coexModule	spearCor	CoexWeight	baseMean	log2FoldChange	lfcSE	stat	pvalue	padj	change	comparison	group
6720489N17Rik	AI504432	TRUE	1	transfac_pro__M06007	3.15	r80__10kb_up_and_down_tss.mc9nr.feather	top50	0.6	0.0228559	102.374	1.18296	0.384784	3.07435	0.0021096	0.0106522	Upregulated	HW_vs_CW	obesity_upregulated
6720489N17Rik	Basp1	TRUE	1	transfac_pro__M06007	3.15	r80__10kb_up_and_down_tss.mc9nr.feather	top50	0.2	0.019037	1018.86	1.13014	0.390876	2.89129	0.00383668	0.017384	Upregulated	HW_vs_CW	obesity_upregulated
6720489N17Rik	Ckap4	TRUE	1	transfac_pro__M06007	3.15	r80__10kb_up_and_down_tss.mc9nr.feather	top50	0.9	0.0179177	1787.44	0.653198	0.14772	4.42188	9.78463e-06	0.000113682	Upregulated	HW_vs_CW	obesity_upregulated
Atf3	Grap2	TRUE	1	dbcorrdb__ATF3__ENCSR000BPS_1__m2	3.52	r80__500bp_up_and_100bp_down_tss.mc9nr.feather	top50	1	0.0216359	237.406	0.748466	0.273428	2.73734	0.00619385	0.0256188	Upregulated	HW_vs_CW	obesity_upregulated
Atf3	Kif21b	TRUE	3	dbcorrdb__ATF3__ENCSR000BPS_1__m2	3.52	r80__500bp_up_and_100bp_down_tss.mc9nr.feather	top50	1	0.0209269	1311.02	1.33758	0.313807	4.26244	2.02208e-05	0.00021321	Upregulated	HW_vs_CW	obesity_upregulated
Atf3	Spi1	TRUE	1	dbcorrdb__ATF3__ENCSR000BPS_1__m2	3.52	r80__500bp_up_and_100bp_down_tss.mc9nr.feather	top50	0.9	0.0209463	2066.97	1.68167	0.375535	4.47806	7.53231e-06	9.122e-05	Upregulated	HW_vs_CW	obesity_upregulated
Atf3	Atf3	TRUE	4	factorbook__CREB	3.05	r80__10kb_up_and_down_tss.mc9nr.feather	top50	1	NA	2915.79	2.45989	0.210676	11.6762	1.68758e-31	1.3317e-28	Upregulated	HW_vs_CW	obesity_upregulated
AU041133	4930579G24Rik	TRUE	1	transfac_pro__M06479	3.3	r80__500bp_up_and_100bp_down_tss.mc9nr.feather	top50	0.7	0.0201009	138.194	0.919723	0.196711	4.6755	2.93232e-06	3.99785e-05	Upregulated	HW_vs_CW	obesity_upregulated
AU041133	Atp6v0e2	TRUE	2	transfac_pro__M06479	3.3	r80__500bp_up_and_100bp_down_tss.mc9nr.feather	top50	1	0.0222155	3349.29	0.822468	0.228219	3.60386	0.000313531	0.0021895	Upregulated	HW_vs_CW	obesity_upregulated
AU041133	Cacna2d1	TRUE	2	transfac_pro__M06479	3.3	r80__500bp_up_and_100bp_down_tss.mc9nr.feather	top50	0.7	0.0212754	3318.25	1.85	0.565811	3.26964	0.00107684	0.0061257	Upregulated	HW_vs_CW	obesity_upregulated
AU041133	Dbp	TRUE	1	transfac_pro__M06479	3.3	r80__500bp_up_and_100bp_down_tss.mc9nr.feather	top50	0.7	0.0226918	3093.23	4.51913	0.221496	20.4028	1.57972e-92	1.03882e-88	Upregulated	HW_vs_CW	obesity_upregulated
AU041133	Dcaf4	TRUE	1	transfac_pro__M06479	3.3	r80__500bp_up_and_100bp_down_tss.mc9nr.feather	top50	0.9	0.0208429	1221.34	1.1067	0.217528	5.0876	3.62619e-07	6.34197e-06	Upregulated	HW_vs_CW	obesity_upregulated
AU041133	Evi5l	TRUE	1	transfac_pro__M06479	3.3	r80__500bp_up_and_100bp_down_tss.mc9nr.feather	top50	1	0.0202381	2453.03	0.560826	0.0947782	5.91725	3.2737e-09	9.61065e-08	Upregulated	HW_vs_CW	obesity_upregulated
AU041133	Gkn3	TRUE	1	transfac_pro__M06479	3.3	r80__500bp_up_and_100bp_down_tss.mc9nr.feather	top50	0.5	0.0199732	71.6409	1.95504	0.428166	4.56609	4.96912e-06	6.32804e-05	Upregulated	HW_vs_CW	obesity_upregulated
AU041133	Mapre2	TRUE	1	transfac_pro__M06479	3.3	r80__500bp_up_and_100bp_down_tss.mc9nr.feather	top50	0.9	0.0184492	6327.64	0.648796	0.146869	4.41752	9.98404e-06	0.000115726	Upregulated	HW_vs_CW	obesity_upregulated
AU041133	Pomgnt2	TRUE	1	transfac_pro__M06479	3.3	r80__500bp_up_and_100bp_down_tss.mc9nr.feather	top50	1	0.0302146	930.198	0.850915	0.163713	5.1976	2.01876e-07	3.81477e-06	Upregulated	HW_vs_CW	obesity_upregulated
AU041133	Slc4a10	TRUE	1	transfac_pro__M06479	3.3	r80__500bp_up_and_100bp_down_tss.mc9nr.feather	top50	0.6	0.0227811	64.468	3.24242	0.931221	3.4819	0.000497871	0.00320562	Upregulated	HW_vs_CW	obesity_upregulated
AU041133	BB218582	TRUE	1	transfac_pro__M06033	3.28	r80__500bp_up_and_100bp_down_tss.mc9nr.feather	top3sd	1	0.0265312	86.4748	1.40731	0.380717	3.69647	0.000218619	0.00162629	Upregulated	HW_vs_CW	obesity_upregulated
Bhlhe40	Bhlhe40	TRUE	49	transfac_pro__M08885	4.7	r80__500bp_up_and_100bp_down_tss.mc9nr.feather	top10perTarget	1	NA	2320.51	1.43227	0.346172	4.13746	3.51166e-05	0.000342419	Upregulated	HW_vs_CW	obesity_upregulated
Bhlhe40	Bhlhe41	TRUE	40	transfac_pro__M08885	4.7	r80__500bp_up_and_100bp_down_tss.mc9nr.feather	top10perTarget	0.9	0.0253602	799.328	2.48351	0.268996	9.23252	2.64346e-20	5.60754e-18	Upregulated	HW_vs_CW	obesity_upregulated
Bhlhe40	Prkag3	TRUE	3	transfac_pro__M08885	4.7	r80__500bp_up_and_100bp_down_tss.mc9nr.feather	top10perTarget	0.1	0.0343338	872.132	3.92524	0.611439	6.41968	1.36564e-10	5.56639e-09	Upregulated	HW_vs_CW	obesity_upregulated
Bhlhe40	Rapsn	TRUE	44	transfac_pro__M08885	4.7	r80__500bp_up_and_100bp_down_tss.mc9nr.feather	top10perTarget	0.9	0.0244745	105.78	2.65236	0.735027	3.60852	0.000307951	0.00215511	Upregulated	HW_vs_CW	obesity_upregulated
Bhlhe40	Slco5a1	TRUE	66	transfac_pro__M08885	4.7	r80__500bp_up_and_100bp_down_tss.mc9nr.feather	top10perTarget	0.9	0.0357355	116.256	2.71336	0.837849	3.23848	0.00120169	0.00671394	Upregulated	HW_vs_CW	obesity_upregulated
Bhlhe40	Tef	TRUE	41	transfac_pro__M08885	4.7	r80__500bp_up_and_100bp_down_tss.mc9nr.feather	top10perTarget	0.9	0.0190071	11827.6	1.24985	0.20376	6.13391	8.57459e-10	2.86711e-08	Upregulated	HW_vs_CW	obesity_upregulated
Bhlhe40	Per2	TRUE	56	cisbp__M0205	4.53	r80__500bp_up_and_100bp_down_tss.mc9nr.feather	top5perTarget	0.9	0.0258724	3889.26	0.812845	0.305842	2.65772	0.00786701	0.0309612	Upregulated	HW_vs_CW	obesity_upregulated
Bhlhe40	Hlf	TRUE	19	transfac_pro__M08870	4.36	r80__500bp_up_and_100bp_down_tss.mc9nr.feather	top10perTarget	0.9	0.017995	1529.81	0.953342	0.360474	2.64469	0.00817658	0.0319979	Upregulated	HW_vs_CW	obesity_upregulated
Bhlhe40	Apoo-ps	TRUE	2	hocomoco__BHE40_MOUSE.H11MO.0.A	3.77	r80__10kb_up_and_down_tss.mc9nr.feather	top1sd	0.1	0.024811	118.29	1.55825	0.633859	2.45835	0.0139575	0.048959	Upregulated	HW_vs_CW	obesity_upregulated
Bhlhe40	Cnga3	TRUE	6	hocomoco__BHE40_MOUSE.H11MO.0.A	3.77	r80__10kb_up_and_down_tss.mc9nr.feather	top1sd	0.872082	0.0207777	12.5698	6.86057	1.84234	3.72383	0.000196221	0.00148772	Upregulated	HW_vs_CW	obesity_upregulated
Bhlhe40	Fndc5	TRUE	6	hocomoco__BHE40_MOUSE.H11MO.0.A	3.77	r80__10kb_up_and_down_tss.mc9nr.feather	top1sd	1	0.0281821	107.697	1.34609	0.412912	3.25999	0.00111416	0.0063107	Upregulated	HW_vs_CW	obesity_upregulated
Bhlhe40	Nr1d2	TRUE	21	hocomoco__BHE40_MOUSE.H11MO.0.A	3.77	r80__10kb_up_and_down_tss.mc9nr.feather	top1sd	0.8	0.0246068	6535.51	1.53509	0.209368	7.332	2.26746e-13	1.51635e-11	Upregulated	HW_vs_CW	obesity_upregulated
Bhlhe40	Vldlr	TRUE	8	hocomoco__BHE40_MOUSE.H11MO.0.A	3.77	r80__10kb_up_and_down_tss.mc9nr.feather	top1sd	0.2	0.0314738	11139.1	0.614377	0.212262	2.89443	0.00379852	0.0172428	Upregulated	HW_vs_CW	obesity_upregulated
Bhlhe40	Zfp133-ps	TRUE	30	hocomoco__BHE40_MOUSE.H11MO.0.A	3.77	r80__10kb_up_and_down_tss.mc9nr.feather	top1sd	0.6	0.0257259	54.7188	0.910855	0.289256	3.14896	0.00163853	0.00865924	Upregulated	HW_vs_CW	obesity_upregulated
Bhlhe40	Rnft2	TRUE	32	hocomoco__BHE40_MOUSE.H11MO.0.A	3.5	r80__500bp_up_and_100bp_down_tss.mc9nr.feather	top10perTarget	0.8	0.0213602	282.364	1.26966	0.364336	3.48485	0.000492406	0.00317769	Upregulated	HW_vs_CW	obesity_upregulated
Bhlhe40	4930429F24Rik	TRUE	1	tfdimers__MD00262	3.38	r80__10kb_up_and_down_tss.mc9nr.feather	top1sd	0.9	0.0224361	164.809	1.04133	0.421799	2.46878	0.0135575	0.0478807	Upregulated	HW_vs_CW	obesity_upregulated
Bhlhe40	Camk2b	TRUE	11	tfdimers__MD00262	3.38	r80__10kb_up_and_down_tss.mc9nr.feather	top1sd	0.9	0.0298707	510.953	1.78729	0.668325	2.67428	0.00748894	0.0297922	Upregulated	HW_vs_CW	obesity_upregulated
Bhlhe40	Plpp7	TRUE	7	tfdimers__MD00262	3.38	r80__10kb_up_and_down_tss.mc9nr.feather	top1sd	0.8	0.0236046	460.042	2.47065	0.752031	3.2853	0.00101873	0.00585078	Upregulated	HW_vs_CW	obesity_upregulated
Bhlhe41	4930429F24Rik	TRUE	1	tfdimers__MD00262	3.89	r80__10kb_up_and_down_tss.mc9nr.feather	top1sd	0.7	0.0234295	164.809	1.04133	0.421799	2.46878	0.0135575	0.0478807	Upregulated	HW_vs_CW	obesity_upregulated
Bhlhe41	Frmpd3	TRUE	1	tfdimers__MD00262	3.89	r80__10kb_up_and_down_tss.mc9nr.feather	top1sd	0.974679	0.0253559	10.6519	2.35474	0.80376	2.92966	0.00339334	0.0157849	Upregulated	HW_vs_CW	obesity_upregulated
Bhlhe41	Kirrel3	TRUE	5	tfdimers__MD00262	3.89	r80__10kb_up_and_down_tss.mc9nr.feather	top1sd	0.7	0.0215199	226.914	1.57796	0.268105	5.8856	3.9662e-09	1.1406e-07	Upregulated	HW_vs_CW	obesity_upregulated
Bhlhe41	Mef2c	TRUE	8	tfdimers__MD00262	3.89	r80__10kb_up_and_down_tss.mc9nr.feather	top1sd	0.7	0.0236778	4064.35	1.14368	0.347125	3.29473	0.000985171	0.0056962	Upregulated	HW_vs_CW	obesity_upregulated
Bhlhe41	Plpp7	TRUE	2	tfdimers__MD00262	3.89	r80__10kb_up_and_down_tss.mc9nr.feather	top1sd	0.5	0.0234509	460.042	2.47065	0.752031	3.2853	0.00101873	0.00585078	Upregulated	HW_vs_CW	obesity_upregulated
Bhlhe41	Bhlhe41	TRUE	37	cisbp__M6161	3.27	r80__10kb_up_and_down_tss.mc9nr.feather	top1sd	1	NA	799.328	2.48351	0.268996	9.23252	2.64346e-20	5.60754e-18	Upregulated	HW_vs_CW	obesity_upregulated
Bhlhe41	Ccdc91	TRUE	1	cisbp__M6161	3.27	r80__10kb_up_and_down_tss.mc9nr.feather	top1sd	0.7	0.0190789	3320.15	0.559849	0.145279	3.85361	0.000116387	0.000954712	Upregulated	HW_vs_CW	obesity_upregulated
Bhlhe41	Cited4	TRUE	1	cisbp__M6161	3.27	r80__10kb_up_and_down_tss.mc9nr.feather	top1sd	0.9	0.0245591	81.6706	2.43844	0.925734	2.63406	0.0084371	0.0328428	Upregulated	HW_vs_CW	obesity_upregulated
Bhlhe41	Ksr1	TRUE	3	cisbp__M6161	3.27	r80__10kb_up_and_down_tss.mc9nr.feather	top1sd	1	0.0444172	2296.34	0.718824	0.282285	2.54645	0.0108826	0.0401445	Upregulated	HW_vs_CW	obesity_upregulated
Bhlhe41	Padi2	TRUE	1	cisbp__M6161	3.27	r80__10kb_up_and_down_tss.mc9nr.feather	top1sd	0.1	0.0256996	516.775	1.01904	0.41387	2.46222	0.0138081	0.0485497	Upregulated	HW_vs_CW	obesity_upregulated
Bhlhe41	Tnik	TRUE	1	cisbp__M6161	3.27	r80__10kb_up_and_down_tss.mc9nr.feather	top1sd	0.5	0.0191163	501.522	1.10761	0.430882	2.57057	0.0101531	0.0380511	Upregulated	HW_vs_CW	obesity_upregulated
Bhlhe41	1810013L24Rik	TRUE	31	cisbp__M5306	3.22	r80__500bp_up_and_100bp_down_tss.mc9nr.feather	top10perTarget	0.8	0.0170825	5679.44	0.50869	0.0857959	5.92906	3.04665e-09	8.99766e-08	Upregulated	HW_vs_CW	obesity_upregulated
Bhlhe41	Ciart	TRUE	39	cisbp__M5306	3.22	r80__500bp_up_and_100bp_down_tss.mc9nr.feather	top10perTarget	0.6	0.0151404	297.75	2.15671	0.490588	4.39616	1.1018e-05	0.000125935	Upregulated	HW_vs_CW	obesity_upregulated
Bhlhe41	Hoxc5	TRUE	35	cisbp__M5306	3.22	r80__500bp_up_and_100bp_down_tss.mc9nr.feather	top10perTarget	0.6	0.0193517	785.687	0.887448	0.176587	5.02554	5.02006e-07	8.45736e-06	Upregulated	HW_vs_CW	obesity_upregulated
Bhlhe41	Slco5a1	TRUE	28	cisbp__M5306	3.22	r80__500bp_up_and_100bp_down_tss.mc9nr.feather	top10perTarget	0.7	0.0234918	116.256	2.71336	0.837849	3.23848	0.00120169	0.00671394	Upregulated	HW_vs_CW	obesity_upregulated
Bhlhe41	Smyd4	TRUE	15	cisbp__M5306	3.22	r80__500bp_up_and_100bp_down_tss.mc9nr.feather	top10perTarget	0.8	0.0166458	561.121	0.552781	0.140483	3.93486	8.32454e-05	0.000714961	Upregulated	HW_vs_CW	obesity_upregulated
Bhlhe41	Tceal5	TRUE	16	cisbp__M5306	3.22	r80__500bp_up_and_100bp_down_tss.mc9nr.feather	top10perTarget	0.3	0.0288074	143.965	3.69824	0.598603	6.17812	6.48709e-10	2.23308e-08	Upregulated	HW_vs_CW	obesity_upregulated
Bhlhe41	Tef	TRUE	32	cisbp__M5306	3.22	r80__500bp_up_and_100bp_down_tss.mc9nr.feather	top10perTarget	1	0.0196268	11827.6	1.24985	0.20376	6.13391	8.57459e-10	2.86711e-08	Upregulated	HW_vs_CW	obesity_upregulated
Bhlhe41	Rapsn	TRUE	7	transfac_pro__M08885	3.1	r80__500bp_up_and_100bp_down_tss.mc9nr.feather	top10perTarget	0.7	0.0252255	105.78	2.65236	0.735027	3.60852	0.000307951	0.00215511	Upregulated	HW_vs_CW	obesity_upregulated
Bmyc	Pcyox1l	TRUE	5	tfdimers__MD00500	4.73	r80__500bp_up_and_100bp_down_tss.mc9nr.feather	top3sd	0.9	0.0221486	258.967	0.690392	0.136304	5.06507	4.08242e-07	7.04619e-06	Upregulated	HW_vs_CW	obesity_upregulated
Bmyc	Pomgnt2	TRUE	12	tfdimers__MD00500	4.73	r80__500bp_up_and_100bp_down_tss.mc9nr.feather	top3sd	0.9	0.0235968	930.198	0.850915	0.163713	5.1976	2.01876e-07	3.81477e-06	Upregulated	HW_vs_CW	obesity_upregulated
Bmyc	Rapsn	TRUE	18	tfdimers__MD00500	4.73	r80__500bp_up_and_100bp_down_tss.mc9nr.feather	top3sd	0.8	0.0220722	105.78	2.65236	0.735027	3.60852	0.000307951	0.00215511	Upregulated	HW_vs_CW	obesity_upregulated
Bmyc	Scml2	TRUE	4	tfdimers__MD00500	4.73	r80__500bp_up_and_100bp_down_tss.mc9nr.feather	top3sd	0.7	0.0211419	59.5398	1.39265	0.346361	4.02081	5.79986e-05	0.000523181	Upregulated	HW_vs_CW	obesity_upregulated
Bmyc	Smarca1	TRUE	3	tfdimers__MD00500	4.73	r80__500bp_up_and_100bp_down_tss.mc9nr.feather	top3sd	0.9	0.0328018	416.484	2.48186	0.808221	3.07076	0.00213512	0.0107618	Upregulated	HW_vs_CW	obesity_upregulated
Bmyc	Ccdc8	TRUE	9	factorbook__MYC	3.98	r80__500bp_up_and_100bp_down_tss.mc9nr.feather	top50perTarget	0.8	0.0138313	545.427	1.29159	0.488604	2.64344	0.00820694	0.0320925	Upregulated	HW_vs_CW	obesity_upregulated
Bmyc	Dbp	TRUE	11	factorbook__MYC	3.98	r80__500bp_up_and_100bp_down_tss.mc9nr.feather	top50perTarget	0.6	0.0169445	3093.23	4.51913	0.221496	20.4028	1.57972e-92	1.03882e-88	Upregulated	HW_vs_CW	obesity_upregulated
Bmyc	Fkbp10	TRUE	8	factorbook__MYC	3.98	r80__500bp_up_and_100bp_down_tss.mc9nr.feather	top50perTarget	0.8	0.0118767	1462.36	0.637623	0.156179	4.08264	4.45263e-05	0.000417497	Upregulated	HW_vs_CW	obesity_upregulated
Bmyc	Hspbap1	TRUE	12	factorbook__MYC	3.98	r80__500bp_up_and_100bp_down_tss.mc9nr.feather	top50perTarget	0.9	0.00906416	400.08	0.602522	0.152767	3.94405	8.01166e-05	0.000692916	Upregulated	HW_vs_CW	obesity_upregulated
Bmyc	Mid1ip1	TRUE	17	factorbook__MYC	3.98	r80__500bp_up_and_100bp_down_tss.mc9nr.feather	top50perTarget	0.9	0.0200448	1474.18	0.567937	0.193073	2.94156	0.00326565	0.0153064	Upregulated	HW_vs_CW	obesity_upregulated
Bmyc	Mxd3	TRUE	7	factorbook__MYC	3.98	r80__500bp_up_and_100bp_down_tss.mc9nr.feather	top50perTarget	0.4	0.00932564	43.9712	1.13777	0.345293	3.29508	0.000983939	0.00569075	Upregulated	HW_vs_CW	obesity_upregulated
Bmyc	Mybpc1	TRUE	5	factorbook__MYC	3.98	r80__500bp_up_and_100bp_down_tss.mc9nr.feather	top50perTarget	0.5	0.00949024	180.475	3.47676	0.962074	3.61382	0.000301722	0.00211753	Upregulated	HW_vs_CW	obesity_upregulated
Bmyc	Nkain1	TRUE	10	factorbook__MYC	3.98	r80__500bp_up_and_100bp_down_tss.mc9nr.feather	top50perTarget	0.9	0.0126246	362.841	1.4628	0.356565	4.10248	4.08741e-05	0.00038936	Upregulated	HW_vs_CW	obesity_upregulated
Bmyc	Nr1d1	TRUE	13	factorbook__MYC	3.98	r80__500bp_up_and_100bp_down_tss.mc9nr.feather	top50perTarget	0.6	0.0119814	9327.87	1.70247	0.199351	8.54006	1.34149e-17	1.82517e-15	Upregulated	HW_vs_CW	obesity_upregulated
Bmyc	Plpp7	TRUE	6	factorbook__MYC	3.98	r80__500bp_up_and_100bp_down_tss.mc9nr.feather	top50perTarget	0.5	0.00461146	460.042	2.47065	0.752031	3.2853	0.00101873	0.00585078	Upregulated	HW_vs_CW	obesity_upregulated
Bmyc	Ptprs	TRUE	12	factorbook__MYC	3.98	r80__500bp_up_and_100bp_down_tss.mc9nr.feather	top50perTarget	0.5	0.00991756	4106.51	1.48524	0.288089	5.15549	2.52965e-07	4.62511e-06	Upregulated	HW_vs_CW	obesity_upregulated
Bmyc	Slco5a1	TRUE	9	factorbook__MYC	3.98	r80__500bp_up_and_100bp_down_tss.mc9nr.feather	top50perTarget	0.8	0.0104914	116.256	2.71336	0.837849	3.23848	0.00120169	0.00671394	Upregulated	HW_vs_CW	obesity_upregulated
Bmyc	Tspan4	TRUE	10	factorbook__MYC	3.98	r80__500bp_up_and_100bp_down_tss.mc9nr.feather	top50perTarget	0.9	0.0103124	6269.48	0.663234	0.147006	4.5116	6.43397e-06	7.95796e-05	Upregulated	HW_vs_CW	obesity_upregulated
Bmyc	Aldh18a1	TRUE	6	dbcorrdb__MYC__ENCSR000DYC_1__m1	3.94	r80__500bp_up_and_100bp_down_tss.mc9nr.feather	top50perTarget	0.8	0.00954777	902.455	1.04295	0.281928	3.69934	0.000216164	0.00161473	Upregulated	HW_vs_CW	obesity_upregulated
Bmyc	Ccne2	TRUE	4	dbcorrdb__MYC__ENCSR000DYC_1__m1	3.94	r80__500bp_up_and_100bp_down_tss.mc9nr.feather	top50perTarget	0.6	0.0108705	250.26	0.692878	0.240451	2.88158	0.00395686	0.0178425	Upregulated	HW_vs_CW	obesity_upregulated
Bmyc	H60b	TRUE	9	dbcorrdb__MYC__ENCSR000DYC_1__m1	3.94	r80__500bp_up_and_100bp_down_tss.mc9nr.feather	top50perTarget	0.872082	0.0230423	28.9082	1.94893	0.420451	4.63534	3.56344e-06	4.71176e-05	Upregulated	HW_vs_CW	obesity_upregulated
Bmyc	Tef	TRUE	6	dbcorrdb__MYC__ENCSR000DYC_1__m1	3.94	r80__500bp_up_and_100bp_down_tss.mc9nr.feather	top50perTarget	0.5	0.00795009	11827.6	1.24985	0.20376	6.13391	8.57459e-10	2.86711e-08	Upregulated	HW_vs_CW	obesity_upregulated
Bmyc	Tle6	TRUE	3	dbcorrdb__MYC__ENCSR000DYC_1__m1	3.94	r80__500bp_up_and_100bp_down_tss.mc9nr.feather	top50perTarget	0.7	0.0106389	203.15	2.11096	0.613153	3.4428	0.000575733	0.00362761	Upregulated	HW_vs_CW	obesity_upregulated
Bmyc	Snx32	TRUE	8	dbcorrdb__MYC__ENCSR000DMP_1__m1	3.75	r80__500bp_up_and_100bp_down_tss.mc9nr.feather	top50	0.9	0.0265398	742.891	0.549664	0.135299	4.06257	4.85347e-05	0.000449106	Upregulated	HW_vs_CW	obesity_upregulated
Bmyc	1810055G02Rik	TRUE	6	cisbp__M4645	3.31	r80__10kb_up_and_down_tss.mc9nr.feather	top50perTarget	0.8	0.0143938	1108.51	0.667836	0.169655	3.93643	8.27042e-05	0.000711241	Upregulated	HW_vs_CW	obesity_upregulated
Bmyc	Ccnd2	TRUE	8	cisbp__M4645	3.31	r80__10kb_up_and_down_tss.mc9nr.feather	top50perTarget	0.4	0.0158525	18310	0.57945	0.226083	2.563	0.0103774	0.0387149	Upregulated	HW_vs_CW	obesity_upregulated
Bmyc	Cux2	TRUE	2	cisbp__M4645	3.31	r80__10kb_up_and_down_tss.mc9nr.feather	top50perTarget	0.3	0.00754579	308.138	2.00134	0.71864	2.7849	0.0053544	0.0227507	Upregulated	HW_vs_CW	obesity_upregulated
Bmyc	Dll4	TRUE	3	cisbp__M4645	3.31	r80__10kb_up_and_down_tss.mc9nr.feather	top50perTarget	0.7	0.00790249	1440.02	1.24188	0.0975079	12.7362	3.72046e-37	4.07762e-34	Upregulated	HW_vs_CW	obesity_upregulated
Bmyc	Dusp5	TRUE	3	cisbp__M4645	3.31	r80__10kb_up_and_down_tss.mc9nr.feather	top50perTarget	0.3	0.00905278	386.022	1.5546	0.544352	2.85586	0.00429198	0.0190489	Upregulated	HW_vs_CW	obesity_upregulated
Bmyc	Elavl3	TRUE	3	cisbp__M4645	3.31	r80__10kb_up_and_down_tss.mc9nr.feather	top50perTarget	0.3	0.00947258	125.193	1.75224	0.601542	2.91291	0.0035808	0.0164719	Upregulated	HW_vs_CW	obesity_upregulated
Bmyc	Iqgap2	TRUE	4	cisbp__M4645	3.31	r80__10kb_up_and_down_tss.mc9nr.feather	top50perTarget	0.3	0.0156777	3665.33	1.38561	0.54288	2.55232	0.0107008	0.0396813	Upregulated	HW_vs_CW	obesity_upregulated
Bmyc	Nckap5l	TRUE	4	cisbp__M4645	3.31	r80__10kb_up_and_down_tss.mc9nr.feather	top50perTarget	0.8	0.00780387	570.459	0.869839	0.31012	2.80485	0.00503398	0.0216788	Upregulated	HW_vs_CW	obesity_upregulated
Bmyc	Nr1d2	TRUE	5	cisbp__M4645	3.31	r80__10kb_up_and_down_tss.mc9nr.feather	top50perTarget	0.6	0.0128469	6535.51	1.53509	0.209368	7.332	2.26746e-13	1.51635e-11	Upregulated	HW_vs_CW	obesity_upregulated
Bmyc	Dcaf4	TRUE	6	dbcorrdb__MYC__ENCSR000EBY_1__m1	3.19	r80__10kb_up_and_down_tss.mc9nr.feather	top10perTarget	0.7	0.0200354	1221.34	1.1067	0.217528	5.0876	3.62619e-07	6.34197e-06	Upregulated	HW_vs_CW	obesity_upregulated
Bmyc	Serpine2	TRUE	1	dbcorrdb__MYC__ENCSR000EGS_1__m1	3.09	r80__10kb_up_and_down_tss.mc9nr.feather	top10perTarget	0.8	0.0150177	5719.37	0.995899	0.235131	4.2355	2.28041e-05	0.000236529	Upregulated	HW_vs_CW	obesity_upregulated
Bmyc	2510009E07Rik	TRUE	7	dbcorrdb__MYC__ENCSR000DMQ_1__m1	3.06	r80__500bp_up_and_100bp_down_tss.mc9nr.feather	top50	0.8	0.0234408	2746.87	0.699672	0.164899	4.24303	2.20525e-05	0.000229942	Upregulated	HW_vs_CW	obesity_upregulated
Bmyc	Actr3b	TRUE	6	dbcorrdb__MYC__ENCSR000DMQ_1__m1	3.06	r80__500bp_up_and_100bp_down_tss.mc9nr.feather	top50	0.8	0.0233986	243.117	1.19668	0.384364	3.11339	0.00184953	0.00956926	Upregulated	HW_vs_CW	obesity_upregulated
Bmyc	Camk2b	TRUE	4	dbcorrdb__MYC__ENCSR000DMQ_1__m1	3.06	r80__500bp_up_and_100bp_down_tss.mc9nr.feather	top50	0.7	0.0203081	510.953	1.78729	0.668325	2.67428	0.00748894	0.0297922	Upregulated	HW_vs_CW	obesity_upregulated
Bmyc	Cks1b	TRUE	3	dbcorrdb__MYC__ENCSR000DMQ_1__m1	3.06	r80__500bp_up_and_100bp_down_tss.mc9nr.feather	top50	0.8	0.0237797	786.979	0.73217	0.152685	4.79529	1.62437e-06	2.35283e-05	Upregulated	HW_vs_CW	obesity_upregulated
Bmyc	Dazl	TRUE	2	dbcorrdb__MYC__ENCSR000DMQ_1__m1	3.06	r80__500bp_up_and_100bp_down_tss.mc9nr.feather	top50	0.9	0.0219516	12.0164	2.1063	0.828185	2.54327	0.010982	0.0404579	Upregulated	HW_vs_CW	obesity_upregulated
Bmyc	Fen1	TRUE	9	dbcorrdb__MYC__ENCSR000DMQ_1__m1	3.06	r80__500bp_up_and_100bp_down_tss.mc9nr.feather	top50	0.9	0.0203625	49.1726	1.07372	0.268436	3.99991	6.33659e-05	0.000564372	Upregulated	HW_vs_CW	obesity_upregulated
Bmyc	Klhl8	TRUE	3	dbcorrdb__MYC__ENCSR000DMQ_1__m1	3.06	r80__500bp_up_and_100bp_down_tss.mc9nr.feather	top50	0.6	0.0196556	1231.66	0.565944	0.202579	2.7937	0.00521091	0.0222609	Upregulated	HW_vs_CW	obesity_upregulated
Cptp	Adcy7	TRUE	1	hdpi__MGC10334	3.69	r80__500bp_up_and_100bp_down_tss.mc9nr.feather	top50perTarget	0.8	0.0109828	3619.78	1.76013	0.314089	5.60393	2.09544e-08	5.10356e-07	Upregulated	HW_vs_CW	obesity_upregulated
Cptp	Alcam	TRUE	1	hdpi__MGC10334	3.69	r80__500bp_up_and_100bp_down_tss.mc9nr.feather	top50perTarget	1	0.0125356	3920.63	1.10878	0.16626	6.66896	2.57615e-11	1.21584e-09	Upregulated	HW_vs_CW	obesity_upregulated
Cptp	Boc	TRUE	1	hdpi__MGC10334	3.69	r80__500bp_up_and_100bp_down_tss.mc9nr.feather	top50perTarget	1	0.0112145	2808.63	0.823677	0.281468	2.92636	0.00342954	0.0159008	Upregulated	HW_vs_CW	obesity_upregulated
Cptp	Elmo1	TRUE	1	hdpi__MGC10334	3.69	r80__500bp_up_and_100bp_down_tss.mc9nr.feather	top50perTarget	1	0.00848765	1983.04	0.702025	0.103273	6.79774	1.06275e-11	5.33482e-10	Upregulated	HW_vs_CW	obesity_upregulated
Cptp	Erg	TRUE	1	hdpi__MGC10334	3.69	r80__500bp_up_and_100bp_down_tss.mc9nr.feather	top50perTarget	0.1	0.0123827	3107.15	0.709088	0.138683	5.11303	3.17036e-07	5.67012e-06	Upregulated	HW_vs_CW	obesity_upregulated
Cptp	Gng2	TRUE	1	hdpi__MGC10334	3.69	r80__500bp_up_and_100bp_down_tss.mc9nr.feather	top50perTarget	0.8	0.0148108	1897.59	0.553338	0.197276	2.80489	0.00503339	0.0216788	Upregulated	HW_vs_CW	obesity_upregulated
Cptp	Hgf	TRUE	1	hdpi__MGC10334	3.69	r80__500bp_up_and_100bp_down_tss.mc9nr.feather	top50perTarget	0.9	0.0105549	429.725	1.35955	0.188676	7.20576	5.77215e-13	3.59221e-11	Upregulated	HW_vs_CW	obesity_upregulated
Cptp	Hr	TRUE	1	hdpi__MGC10334	3.69	r80__500bp_up_and_100bp_down_tss.mc9nr.feather	top50perTarget	0.3	0.00922935	8345.82	0.804354	0.319646	2.51639	0.0118563	0.0429807	Upregulated	HW_vs_CW	obesity_upregulated
Cptp	Large1	TRUE	1	hdpi__MGC10334	3.69	r80__500bp_up_and_100bp_down_tss.mc9nr.feather	top50perTarget	0.3	0.00954801	2411.91	0.722118	0.166546	4.33584	1.45204e-05	0.000160122	Upregulated	HW_vs_CW	obesity_upregulated
Cptp	Malt1	TRUE	1	hdpi__MGC10334	3.69	r80__500bp_up_and_100bp_down_tss.mc9nr.feather	top50perTarget	1	0.00985279	2071	0.952672	0.192927	4.938	7.8929e-07	1.24569e-05	Upregulated	HW_vs_CW	obesity_upregulated
Cptp	Mr1	TRUE	1	hdpi__MGC10334	3.69	r80__500bp_up_and_100bp_down_tss.mc9nr.feather	top50perTarget	0.7	0.0099583	2146.84	0.576419	0.191223	3.01439	0.00257499	0.0125617	Upregulated	HW_vs_CW	obesity_upregulated
Cptp	Npas4	TRUE	1	hdpi__MGC10334	3.69	r80__500bp_up_and_100bp_down_tss.mc9nr.feather	top50perTarget	0.8	0.00961407	70.4331	2.11606	0.773804	2.73463	0.0062451	0.0257747	Upregulated	HW_vs_CW	obesity_upregulated
Cptp	Ppp1r18	TRUE	1	hdpi__MGC10334	3.69	r80__500bp_up_and_100bp_down_tss.mc9nr.feather	top50perTarget	0.7	0.00773644	4877.25	0.537874	0.160558	3.35003	0.000808034	0.00482765	Upregulated	HW_vs_CW	obesity_upregulated
Cptp	Prps2	TRUE	1	hdpi__MGC10334	3.69	r80__500bp_up_and_100bp_down_tss.mc9nr.feather	top50perTarget	1	0.0141982	1758.55	1.00353	0.160838	6.23937	4.39346e-10	1.56734e-08	Upregulated	HW_vs_CW	obesity_upregulated
Cptp	Prr11	TRUE	1	hdpi__MGC10334	3.69	r80__500bp_up_and_100bp_down_tss.mc9nr.feather	top50perTarget	0.8	0.00855316	130.252	1.25316	0.273937	4.57464	4.77045e-06	6.09747e-05	Upregulated	HW_vs_CW	obesity_upregulated
Cptp	Rtn4rl1	TRUE	1	hdpi__MGC10334	3.69	r80__500bp_up_and_100bp_down_tss.mc9nr.feather	top50perTarget	0.9	0.0160845	2574.61	1.54571	0.268097	5.7655	8.1414e-09	2.15878e-07	Upregulated	HW_vs_CW	obesity_upregulated
Cptp	Sertad4	TRUE	1	hdpi__MGC10334	3.69	r80__500bp_up_and_100bp_down_tss.mc9nr.feather	top50perTarget	0.9	0.0157058	269.249	0.772397	0.302848	2.55044	0.0107587	0.0398286	Upregulated	HW_vs_CW	obesity_upregulated
Cptp	Steap4	TRUE	1	hdpi__MGC10334	3.69	r80__500bp_up_and_100bp_down_tss.mc9nr.feather	top50perTarget	0.1	0.00763858	22517.6	0.68546	0.23781	2.88239	0.00394668	0.0178047	Upregulated	HW_vs_CW	obesity_upregulated
Cptp	Zfp710	TRUE	1	hdpi__MGC10334	3.69	r80__500bp_up_and_100bp_down_tss.mc9nr.feather	top50perTarget	0.9	0.00998973	1785.98	0.835706	0.193942	4.30906	1.63948e-05	0.000177575	Upregulated	HW_vs_CW	obesity_upregulated
Creb3l2	Aldh18a1	TRUE	11	hocomoco__CR3L2_HUMAN.H11MO.0.D	3.37	r80__500bp_up_and_100bp_down_tss.mc9nr.feather	top1sd	1	0.0123476	902.455	1.04295	0.281928	3.69934	0.000216164	0.00161473	Upregulated	HW_vs_CW	obesity_upregulated
Creb3l2	Ankrd37	TRUE	13	hocomoco__CR3L2_HUMAN.H11MO.0.D	3.37	r80__500bp_up_and_100bp_down_tss.mc9nr.feather	top1sd	0.7	0.0202672	22.4532	1.54827	0.417905	3.70484	0.000211522	0.00158425	Upregulated	HW_vs_CW	obesity_upregulated
Creb3l2	Anln	TRUE	11	hocomoco__CR3L2_HUMAN.H11MO.0.D	3.37	r80__500bp_up_and_100bp_down_tss.mc9nr.feather	top1sd	0.4	0.011493	1073.5	0.611562	0.228688	2.67422	0.00749032	0.0297922	Upregulated	HW_vs_CW	obesity_upregulated
Creb3l2	Apex1	TRUE	10	hocomoco__CR3L2_HUMAN.H11MO.0.D	3.37	r80__500bp_up_and_100bp_down_tss.mc9nr.feather	top1sd	0.7	0.0124032	756.975	0.592407	0.137266	4.31575	1.5906e-05	0.000173463	Upregulated	HW_vs_CW	obesity_upregulated
Creb3l2	Armcx3	TRUE	19	hocomoco__CR3L2_HUMAN.H11MO.0.D	3.37	r80__500bp_up_and_100bp_down_tss.mc9nr.feather	top1sd	1	0.012732	1939.95	0.599472	0.129264	4.63756	3.52549e-06	4.66784e-05	Upregulated	HW_vs_CW	obesity_upregulated
Creb3l2	B3gnt9	TRUE	26	hocomoco__CR3L2_HUMAN.H11MO.0.D	3.37	r80__500bp_up_and_100bp_down_tss.mc9nr.feather	top1sd	0.9	0.0168706	468.118	0.705333	0.194248	3.6311	0.00028222	0.00200708	Upregulated	HW_vs_CW	obesity_upregulated
Creb3l2	Bax	TRUE	10	hocomoco__CR3L2_HUMAN.H11MO.0.D	3.37	r80__500bp_up_and_100bp_down_tss.mc9nr.feather	top1sd	0.6	0.012594	838.806	0.513536	0.165071	3.111	0.00186456	0.00963183	Upregulated	HW_vs_CW	obesity_upregulated
Creb3l2	C1qtnf2	TRUE	10	hocomoco__CR3L2_HUMAN.H11MO.0.D	3.37	r80__500bp_up_and_100bp_down_tss.mc9nr.feather	top1sd	1	0.0116902	356.653	0.567322	0.181454	3.12654	0.00176879	0.00921431	Upregulated	HW_vs_CW	obesity_upregulated
Creb3l2	Ccnd1	TRUE	13	hocomoco__CR3L2_HUMAN.H11MO.0.D	3.37	r80__500bp_up_and_100bp_down_tss.mc9nr.feather	top1sd	0.7	0.0120038	2440.17	1.19476	0.293808	4.06646	4.77324e-05	0.000442719	Upregulated	HW_vs_CW	obesity_upregulated
Creb3l2	Cenpp	TRUE	8	hocomoco__CR3L2_HUMAN.H11MO.0.D	3.37	r80__500bp_up_and_100bp_down_tss.mc9nr.feather	top1sd	1	0.0134515	70.3691	1.35612	0.276612	4.9026	9.45743e-07	1.46013e-05	Upregulated	HW_vs_CW	obesity_upregulated
Creb3l2	Chpf	TRUE	9	hocomoco__CR3L2_HUMAN.H11MO.0.D	3.37	r80__500bp_up_and_100bp_down_tss.mc9nr.feather	top1sd	0.9	0.0122597	2612.55	0.716072	0.181743	3.94002	8.14756e-05	0.0007019	Upregulated	HW_vs_CW	obesity_upregulated
Creb3l2	Fam184a	TRUE	12	hocomoco__CR3L2_HUMAN.H11MO.0.D	3.37	r80__500bp_up_and_100bp_down_tss.mc9nr.feather	top1sd	0.8	0.014861	375.538	1.75645	0.228884	7.67399	1.66732e-14	1.4178e-12	Upregulated	HW_vs_CW	obesity_upregulated
Creb3l2	Fen1	TRUE	9	hocomoco__CR3L2_HUMAN.H11MO.0.D	3.37	r80__500bp_up_and_100bp_down_tss.mc9nr.feather	top1sd	0.9	0.0114717	49.1726	1.07372	0.268436	3.99991	6.33659e-05	0.000564372	Upregulated	HW_vs_CW	obesity_upregulated
Creb3l2	Fkbp10	TRUE	15	hocomoco__CR3L2_HUMAN.H11MO.0.D	3.37	r80__500bp_up_and_100bp_down_tss.mc9nr.feather	top1sd	1	0.0159661	1462.36	0.637623	0.156179	4.08264	4.45263e-05	0.000417497	Upregulated	HW_vs_CW	obesity_upregulated
Creb3l2	Fkbp14	TRUE	23	hocomoco__CR3L2_HUMAN.H11MO.0.D	3.37	r80__500bp_up_and_100bp_down_tss.mc9nr.feather	top1sd	0.9	0.0130226	1231.83	0.838915	0.140907	5.95367	2.622e-09	7.82553e-08	Upregulated	HW_vs_CW	obesity_upregulated
Creb3l2	Fmr1	TRUE	12	hocomoco__CR3L2_HUMAN.H11MO.0.D	3.37	r80__500bp_up_and_100bp_down_tss.mc9nr.feather	top1sd	0.2	0.0144029	17442.7	2.40433	0.234991	10.2316	1.43167e-24	5.64881e-22	Upregulated	HW_vs_CW	obesity_upregulated
Creb3l2	Hspbap1	TRUE	11	hocomoco__CR3L2_HUMAN.H11MO.0.D	3.37	r80__500bp_up_and_100bp_down_tss.mc9nr.feather	top1sd	0.9	0.0208844	400.08	0.602522	0.152767	3.94405	8.01166e-05	0.000692916	Upregulated	HW_vs_CW	obesity_upregulated
Creb3l2	Map7	TRUE	13	hocomoco__CR3L2_HUMAN.H11MO.0.D	3.37	r80__500bp_up_and_100bp_down_tss.mc9nr.feather	top1sd	1	0.0117706	994.296	0.761171	0.22816	3.33613	0.000849545	0.00501941	Upregulated	HW_vs_CW	obesity_upregulated
Creb3l2	Mcm2	TRUE	10	hocomoco__CR3L2_HUMAN.H11MO.0.D	3.37	r80__500bp_up_and_100bp_down_tss.mc9nr.feather	top1sd	1	0.0117233	712.777	1.36966	0.315934	4.33526	1.45586e-05	0.000160454	Upregulated	HW_vs_CW	obesity_upregulated
Creb3l2	Ogdhl	TRUE	11	hocomoco__CR3L2_HUMAN.H11MO.0.D	3.37	r80__500bp_up_and_100bp_down_tss.mc9nr.feather	top1sd	0.9	0.0116103	244.592	2.40971	0.500477	4.81482	1.47334e-06	2.16864e-05	Upregulated	HW_vs_CW	obesity_upregulated
Creb3l2	P3h1	TRUE	29	hocomoco__CR3L2_HUMAN.H11MO.0.D	3.37	r80__500bp_up_and_100bp_down_tss.mc9nr.feather	top1sd	0.8	0.01446	2296.11	0.63899	0.164984	3.87304	0.000107487	0.000892056	Upregulated	HW_vs_CW	obesity_upregulated
Creb3l2	Pakap	TRUE	7	hocomoco__CR3L2_HUMAN.H11MO.0.D	3.37	r80__500bp_up_and_100bp_down_tss.mc9nr.feather	top1sd	0.7	0.0134643	29675.5	0.571985	0.144055	3.97059	7.1694e-05	0.000629453	Upregulated	HW_vs_CW	obesity_upregulated
Creb3l2	Pdia5	TRUE	23	hocomoco__CR3L2_HUMAN.H11MO.0.D	3.37	r80__500bp_up_and_100bp_down_tss.mc9nr.feather	top1sd	0.9	0.0114727	664.784	0.718866	0.170219	4.22318	2.40882e-05	0.000247507	Upregulated	HW_vs_CW	obesity_upregulated
Creb3l2	Rad50	TRUE	7	hocomoco__CR3L2_HUMAN.H11MO.0.D	3.37	r80__500bp_up_and_100bp_down_tss.mc9nr.feather	top1sd	1	0.0114872	3111.03	1.48137	0.216462	6.84355	7.72528e-12	3.91785e-10	Upregulated	HW_vs_CW	obesity_upregulated
Creb3l2	Rnf145	TRUE	19	hocomoco__CR3L2_HUMAN.H11MO.0.D	3.37	r80__500bp_up_and_100bp_down_tss.mc9nr.feather	top1sd	0.9	0.0122423	5144.88	0.584147	0.167118	3.49542	0.000473321	0.0030853	Upregulated	HW_vs_CW	obesity_upregulated
Creb3l2	Rrad	TRUE	11	hocomoco__CR3L2_HUMAN.H11MO.0.D	3.37	r80__500bp_up_and_100bp_down_tss.mc9nr.feather	top1sd	0.9	0.0122627	225.406	1.13965	0.446591	2.55189	0.0107142	0.0397154	Upregulated	HW_vs_CW	obesity_upregulated
Creb3l2	Scfd1	TRUE	22	hocomoco__CR3L2_HUMAN.H11MO.0.D	3.37	r80__500bp_up_and_100bp_down_tss.mc9nr.feather	top1sd	0.9	0.0116478	2923.06	0.51134	0.118155	4.32771	1.50665e-05	0.000165404	Upregulated	HW_vs_CW	obesity_upregulated
Creb3l2	Slco3a1	TRUE	13	hocomoco__CR3L2_HUMAN.H11MO.0.D	3.37	r80__500bp_up_and_100bp_down_tss.mc9nr.feather	top1sd	1	0.015954	1961.88	0.502284	0.17802	2.8215	0.0047799	0.0207842	Upregulated	HW_vs_CW	obesity_upregulated
Creb3l2	Tbc1d8b	TRUE	6	hocomoco__CR3L2_HUMAN.H11MO.0.D	3.37	r80__500bp_up_and_100bp_down_tss.mc9nr.feather	top1sd	0.9	0.0136458	1308.54	0.748497	0.0968131	7.73136	1.06405e-14	9.32961e-13	Upregulated	HW_vs_CW	obesity_upregulated
Creb3l2	1810055G02Rik	TRUE	17	taipale__Creb3l2_DBD_TGCCACGTGGCA	3.25	r80__500bp_up_and_100bp_down_tss.mc9nr.feather	top1sd	1	0.0126858	1108.51	0.667836	0.169655	3.93643	8.27042e-05	0.000711241	Upregulated	HW_vs_CW	obesity_upregulated
Creb3l2	Brca2	TRUE	7	taipale__Creb3l2_DBD_TGCCACGTGGCA	3.25	r80__500bp_up_and_100bp_down_tss.mc9nr.feather	top1sd	0.9	0.0122855	370.183	0.909308	0.187011	4.86232	1.16017e-06	1.75655e-05	Upregulated	HW_vs_CW	obesity_upregulated
Creb3l2	Calm3	TRUE	4	taipale__Creb3l2_DBD_TGCCACGTGGCA	3.25	r80__500bp_up_and_100bp_down_tss.mc9nr.feather	top1sd	0.9	0.0191649	13308.9	0.841534	0.106476	7.90349	2.71204e-15	2.55995e-13	Upregulated	HW_vs_CW	obesity_upregulated
Creb3l2	Ccdc187	TRUE	2	taipale__Creb3l2_DBD_TGCCACGTGGCA	3.25	r80__500bp_up_and_100bp_down_tss.mc9nr.feather	top1sd	0.1	0.0136107	49.4456	2.19727	0.883673	2.48652	0.0128999	0.0460449	Upregulated	HW_vs_CW	obesity_upregulated
Creb3l2	Ccdc8	TRUE	9	taipale__Creb3l2_DBD_TGCCACGTGGCA	3.25	r80__500bp_up_and_100bp_down_tss.mc9nr.feather	top1sd	1	0.0142274	545.427	1.29159	0.488604	2.64344	0.00820694	0.0320925	Upregulated	HW_vs_CW	obesity_upregulated
Creb3l2	Ccne1	TRUE	2	taipale__Creb3l2_DBD_TGCCACGTGGCA	3.25	r80__500bp_up_and_100bp_down_tss.mc9nr.feather	top1sd	0.8	0.0124572	224.865	1.50715	0.295136	5.10665	3.27926e-07	5.8277e-06	Upregulated	HW_vs_CW	obesity_upregulated
Creb3l2	Cdk18	TRUE	9	taipale__Creb3l2_DBD_TGCCACGTGGCA	3.25	r80__500bp_up_and_100bp_down_tss.mc9nr.feather	top1sd	0.9	0.0176192	990.237	0.935662	0.374143	2.50082	0.0123907	0.0445741	Upregulated	HW_vs_CW	obesity_upregulated
Creb3l2	Cntln	TRUE	8	taipale__Creb3l2_DBD_TGCCACGTGGCA	3.25	r80__500bp_up_and_100bp_down_tss.mc9nr.feather	top1sd	1	0.0145901	1519.62	0.653437	0.188018	3.47539	0.000510116	0.0032727	Upregulated	HW_vs_CW	obesity_upregulated
Creb3l2	Col16a1	TRUE	8	taipale__Creb3l2_DBD_TGCCACGTGGCA	3.25	r80__500bp_up_and_100bp_down_tss.mc9nr.feather	top1sd	0.8	0.0129555	2610.5	1.66537	0.247423	6.73088	1.68638e-11	8.21456e-10	Upregulated	HW_vs_CW	obesity_upregulated
Creb3l2	Creb3l2	TRUE	7	taipale__Creb3l2_DBD_TGCCACGTGGCA	3.25	r80__500bp_up_and_100bp_down_tss.mc9nr.feather	top1sd	1	NA	6430	0.694527	0.215936	3.21635	0.00129832	0.00716653	Upregulated	HW_vs_CW	obesity_upregulated
Creb3l2	Cry2	TRUE	6	taipale__Creb3l2_DBD_TGCCACGTGGCA	3.25	r80__500bp_up_and_100bp_down_tss.mc9nr.feather	top1sd	0.9	0.0115966	4235.35	0.544303	0.109274	4.98111	6.32217e-07	1.03163e-05	Upregulated	HW_vs_CW	obesity_upregulated
Creb3l2	Cyb561d2	TRUE	8	taipale__Creb3l2_DBD_TGCCACGTGGCA	3.25	r80__500bp_up_and_100bp_down_tss.mc9nr.feather	top1sd	1	0.0144962	615.664	0.719549	0.108022	6.66114	2.71716e-11	1.26853e-09	Upregulated	HW_vs_CW	obesity_upregulated
Creb3l2	Cyb5b	TRUE	10	taipale__Creb3l2_DBD_TGCCACGTGGCA	3.25	r80__500bp_up_and_100bp_down_tss.mc9nr.feather	top1sd	0.7	0.0197813	22726.9	0.930234	0.204172	4.55612	5.21064e-06	6.58524e-05	Upregulated	HW_vs_CW	obesity_upregulated
Creb3l2	Dck	TRUE	5	taipale__Creb3l2_DBD_TGCCACGTGGCA	3.25	r80__500bp_up_and_100bp_down_tss.mc9nr.feather	top1sd	0.8	0.0129778	621.568	1.04221	0.18852	5.5284	3.23164e-08	7.58072e-07	Upregulated	HW_vs_CW	obesity_upregulated
Creb3l2	Depdc1a	TRUE	7	taipale__Creb3l2_DBD_TGCCACGTGGCA	3.25	r80__500bp_up_and_100bp_down_tss.mc9nr.feather	top1sd	0.9	0.0133705	30.8083	2.29953	0.456404	5.03837	4.69511e-07	8.00562e-06	Upregulated	HW_vs_CW	obesity_upregulated
Creb3l2	Dnase1l1	TRUE	3	taipale__Creb3l2_DBD_TGCCACGTGGCA	3.25	r80__500bp_up_and_100bp_down_tss.mc9nr.feather	top1sd	0.7	0.0127846	2091.61	0.951494	0.228171	4.1701	3.0447e-05	0.000303516	Upregulated	HW_vs_CW	obesity_upregulated
Creb3l2	Dusp7	TRUE	8	taipale__Creb3l2_DBD_TGCCACGTGGCA	3.25	r80__500bp_up_and_100bp_down_tss.mc9nr.feather	top1sd	0.7	0.0160314	1626.58	0.512445	0.150224	3.41121	0.000646758	0.00400397	Upregulated	HW_vs_CW	obesity_upregulated
Creb3l2	Frmd8	TRUE	3	taipale__Creb3l2_DBD_TGCCACGTGGCA	3.25	r80__500bp_up_and_100bp_down_tss.mc9nr.feather	top1sd	0.9	0.0126089	2103.82	0.65388	0.128479	5.08939	3.59212e-07	6.29354e-06	Upregulated	HW_vs_CW	obesity_upregulated
Creb3l2	Fut7	TRUE	2	taipale__Creb3l2_DBD_TGCCACGTGGCA	3.25	r80__500bp_up_and_100bp_down_tss.mc9nr.feather	top1sd	0.6	0.0116233	42.2217	2.50531	0.50813	4.93045	8.20409e-07	1.29067e-05	Upregulated	HW_vs_CW	obesity_upregulated
Creb3l2	Gm7694	TRUE	8	taipale__Creb3l2_DBD_TGCCACGTGGCA	3.25	r80__500bp_up_and_100bp_down_tss.mc9nr.feather	top1sd	0.9	0.0115284	723.369	1.31367	0.260758	5.03789	4.70685e-07	8.01871e-06	Upregulated	HW_vs_CW	obesity_upregulated
Creb3l2	Gmfb	TRUE	8	taipale__Creb3l2_DBD_TGCCACGTGGCA	3.25	r80__500bp_up_and_100bp_down_tss.mc9nr.feather	top1sd	0.9	0.0124154	9458.19	0.502391	0.118722	4.23165	2.31984e-05	0.000239989	Upregulated	HW_vs_CW	obesity_upregulated
Creb3l2	Hltf	TRUE	6	taipale__Creb3l2_DBD_TGCCACGTGGCA	3.25	r80__500bp_up_and_100bp_down_tss.mc9nr.feather	top1sd	1	0.0115761	1656.38	0.718552	0.11859	6.05911	1.36874e-09	4.36933e-08	Upregulated	HW_vs_CW	obesity_upregulated
Creb3l2	Hps1	TRUE	6	taipale__Creb3l2_DBD_TGCCACGTGGCA	3.25	r80__500bp_up_and_100bp_down_tss.mc9nr.feather	top1sd	1	0.0131398	1386.42	0.750007	0.145765	5.1453	2.67091e-07	4.86086e-06	Upregulated	HW_vs_CW	obesity_upregulated
Creb3l2	Igfals	TRUE	3	taipale__Creb3l2_DBD_TGCCACGTGGCA	3.25	r80__500bp_up_and_100bp_down_tss.mc9nr.feather	top1sd	0.4	0.0143715	1973.84	1.16648	0.269317	4.33124	1.48274e-05	0.000163143	Upregulated	HW_vs_CW	obesity_upregulated
Creb3l2	Naglu	TRUE	10	taipale__Creb3l2_DBD_TGCCACGTGGCA	3.25	r80__500bp_up_and_100bp_down_tss.mc9nr.feather	top1sd	0.8	0.0132054	2438.84	0.913019	0.184573	4.94666	7.54968e-07	1.20113e-05	Upregulated	HW_vs_CW	obesity_upregulated
Creb3l2	Podxl2	TRUE	2	taipale__Creb3l2_DBD_TGCCACGTGGCA	3.25	r80__500bp_up_and_100bp_down_tss.mc9nr.feather	top1sd	0.8	0.0192623	560.262	2.01431	0.473135	4.25737	2.06848e-05	0.00021729	Upregulated	HW_vs_CW	obesity_upregulated
Creb3l2	Pole3	TRUE	5	taipale__Creb3l2_DBD_TGCCACGTGGCA	3.25	r80__500bp_up_and_100bp_down_tss.mc9nr.feather	top1sd	0.9	0.013339	2896.79	0.633403	0.120966	5.23621	1.63909e-07	3.18267e-06	Upregulated	HW_vs_CW	obesity_upregulated
Creb3l2	Pomgnt2	TRUE	5	taipale__Creb3l2_DBD_TGCCACGTGGCA	3.25	r80__500bp_up_and_100bp_down_tss.mc9nr.feather	top1sd	0.9	0.0137597	930.198	0.850915	0.163713	5.1976	2.01876e-07	3.81477e-06	Upregulated	HW_vs_CW	obesity_upregulated
Creb3l2	Ppfia3	TRUE	7	taipale__Creb3l2_DBD_TGCCACGTGGCA	3.25	r80__500bp_up_and_100bp_down_tss.mc9nr.feather	top1sd	0.6	0.0174097	309.998	1.16337	0.185954	6.25624	3.94379e-10	1.4408e-08	Upregulated	HW_vs_CW	obesity_upregulated
Creb3l2	Ppp3ca	TRUE	10	taipale__Creb3l2_DBD_TGCCACGTGGCA	3.25	r80__500bp_up_and_100bp_down_tss.mc9nr.feather	top1sd	0.6	0.0186823	6383.75	0.580571	0.114955	5.05042	4.40847e-07	7.56921e-06	Upregulated	HW_vs_CW	obesity_upregulated
Creb3l2	Ptrh1	TRUE	5	taipale__Creb3l2_DBD_TGCCACGTGGCA	3.25	r80__500bp_up_and_100bp_down_tss.mc9nr.feather	top1sd	0.9	0.0139901	212.796	1.21954	0.226191	5.39165	6.98153e-08	1.50691e-06	Upregulated	HW_vs_CW	obesity_upregulated
Creb3l2	Pycr1	TRUE	4	taipale__Creb3l2_DBD_TGCCACGTGGCA	3.25	r80__500bp_up_and_100bp_down_tss.mc9nr.feather	top1sd	1	0.0133184	213.452	2.677	0.379929	7.04603	1.84092e-12	1.03764e-10	Upregulated	HW_vs_CW	obesity_upregulated
Creb3l2	Pycr2	TRUE	7	taipale__Creb3l2_DBD_TGCCACGTGGCA	3.25	r80__500bp_up_and_100bp_down_tss.mc9nr.feather	top1sd	0.9	0.0119986	1455.7	0.509299	0.128182	3.97325	7.08982e-05	0.000623576	Upregulated	HW_vs_CW	obesity_upregulated
Creb3l2	Rps6ka1	TRUE	9	taipale__Creb3l2_DBD_TGCCACGTGGCA	3.25	r80__500bp_up_and_100bp_down_tss.mc9nr.feather	top1sd	0.6	0.0124975	1319.35	0.805459	0.215316	3.74082	0.000183418	0.00140469	Upregulated	HW_vs_CW	obesity_upregulated
Creb3l2	S1pr2	TRUE	12	taipale__Creb3l2_DBD_TGCCACGTGGCA	3.25	r80__500bp_up_and_100bp_down_tss.mc9nr.feather	top1sd	0.8	0.0143903	981.389	1.15686	0.292449	3.95578	7.62845e-05	0.000663846	Upregulated	HW_vs_CW	obesity_upregulated
Creb3l2	Scd2	TRUE	6	taipale__Creb3l2_DBD_TGCCACGTGGCA	3.25	r80__500bp_up_and_100bp_down_tss.mc9nr.feather	top1sd	0.7	0.0127582	15734.6	2.65891	0.292135	9.10165	8.89689e-20	1.75518e-17	Upregulated	HW_vs_CW	obesity_upregulated
Creb3l2	Smyd4	TRUE	7	taipale__Creb3l2_DBD_TGCCACGTGGCA	3.25	r80__500bp_up_and_100bp_down_tss.mc9nr.feather	top1sd	0.7	0.0132454	561.121	0.552781	0.140483	3.93486	8.32454e-05	0.000714961	Upregulated	HW_vs_CW	obesity_upregulated
Creb3l2	Snx32	TRUE	7	taipale__Creb3l2_DBD_TGCCACGTGGCA	3.25	r80__500bp_up_and_100bp_down_tss.mc9nr.feather	top1sd	0.9	0.0124177	742.891	0.549664	0.135299	4.06257	4.85347e-05	0.000449106	Upregulated	HW_vs_CW	obesity_upregulated
Creb3l2	Stard6	TRUE	4	taipale__Creb3l2_DBD_TGCCACGTGGCA	3.25	r80__500bp_up_and_100bp_down_tss.mc9nr.feather	top1sd	0.9	0.0127978	105.029	1.17149	0.383232	3.05687	0.00223658	0.0111818	Upregulated	HW_vs_CW	obesity_upregulated
Creb3l2	Tmem237	TRUE	2	taipale__Creb3l2_DBD_TGCCACGTGGCA	3.25	r80__500bp_up_and_100bp_down_tss.mc9nr.feather	top1sd	0.9	0.0201058	614.139	0.577745	0.177692	3.25138	0.00114845	0.00646226	Upregulated	HW_vs_CW	obesity_upregulated
Creb3l2	Ttc12	TRUE	5	taipale__Creb3l2_DBD_TGCCACGTGGCA	3.25	r80__500bp_up_and_100bp_down_tss.mc9nr.feather	top1sd	1	0.0141051	416.405	0.648733	0.225759	2.87356	0.00405874	0.0182477	Upregulated	HW_vs_CW	obesity_upregulated
Creb3l2	Wdr86	TRUE	5	taipale__Creb3l2_DBD_TGCCACGTGGCA	3.25	r80__500bp_up_and_100bp_down_tss.mc9nr.feather	top1sd	0.9	0.012276	135.244	0.836306	0.301817	2.7709	0.00559011	0.0235846	Upregulated	HW_vs_CW	obesity_upregulated
Creb3l2	Zfp423	TRUE	10	taipale__Creb3l2_DBD_TGCCACGTGGCA	3.25	r80__500bp_up_and_100bp_down_tss.mc9nr.feather	top1sd	0.3	0.0158104	3672.15	0.620015	0.242983	2.55168	0.0107206	0.0397251	Upregulated	HW_vs_CW	obesity_upregulated
Creb3l2	Zfp9	TRUE	6	taipale__Creb3l2_DBD_TGCCACGTGGCA	3.25	r80__500bp_up_and_100bp_down_tss.mc9nr.feather	top1sd	1	0.0129722	614.367	0.517256	0.0852383	6.06835	1.29228e-09	4.17252e-08	Upregulated	HW_vs_CW	obesity_upregulated
Creb3l2	Fgf13	TRUE	5	cisbp__M5997	3.2	r80__500bp_up_and_100bp_down_tss.mc9nr.feather	top1sd	0.4	0.0130553	2441.41	3.64055	0.342941	10.6157	2.51953e-26	1.18346e-23	Upregulated	HW_vs_CW	obesity_upregulated
Creb3l2	Ccnd2	TRUE	2	cisbp__M4897	3.17	r80__500bp_up_and_100bp_down_tss.mc9nr.feather	top1sd	0.6	0.0145187	18310	0.57945	0.226083	2.563	0.0103774	0.0387149	Upregulated	HW_vs_CW	obesity_upregulated
Creb3l2	Ldlr	TRUE	3	cisbp__M4897	3.17	r80__500bp_up_and_100bp_down_tss.mc9nr.feather	top1sd	0.6	0.0133454	1711.55	1.24689	0.3937	3.16711	0.00153964	0.00823816	Upregulated	HW_vs_CW	obesity_upregulated
Creb3l2	Mmp13	TRUE	3	cisbp__M4897	3.17	r80__500bp_up_and_100bp_down_tss.mc9nr.feather	top1sd	0.9	0.0130942	61.3587	3.73358	0.775597	4.81382	1.48073e-06	2.17512e-05	Upregulated	HW_vs_CW	obesity_upregulated
Creb3l2	Pde4b	TRUE	4	cisbp__M4897	3.17	r80__500bp_up_and_100bp_down_tss.mc9nr.feather	top1sd	0.7	0.0146094	2165.25	0.584982	0.191159	3.06018	0.00221205	0.0110872	Upregulated	HW_vs_CW	obesity_upregulated
Creb3l2	Sec61b	TRUE	8	cisbp__M4897	3.17	r80__500bp_up_and_100bp_down_tss.mc9nr.feather	top1sd	1	0.0123793	2657.14	0.855386	0.21197	4.0354	5.45084e-05	0.000495929	Upregulated	HW_vs_CW	obesity_upregulated
Creb3l2	Tbc1d7	TRUE	4	cisbp__M4897	3.17	r80__500bp_up_and_100bp_down_tss.mc9nr.feather	top1sd	0.6	0.0207253	624.726	0.664273	0.159184	4.173	3.00619e-05	0.000300633	Upregulated	HW_vs_CW	obesity_upregulated
Creb3l2	Zgrf1	TRUE	4	cisbp__M4897	3.17	r80__500bp_up_and_100bp_down_tss.mc9nr.feather	top1sd	1	0.0211701	187.512	0.877423	0.262569	3.34169	0.0008327	0.0049456	Upregulated	HW_vs_CW	obesity_upregulated
Creb3l2	Actr3b	TRUE	6	transfac_pro__M07679	3.04	r80__10kb_up_and_down_tss.mc9nr.feather	w0.005	0.3	0.00680736	243.117	1.19668	0.384364	3.11339	0.00184953	0.00956926	Upregulated	HW_vs_CW	obesity_upregulated
Creb3l2	AI504432	TRUE	1	transfac_pro__M07679	3.04	r80__10kb_up_and_down_tss.mc9nr.feather	w0.005	0.6	0.00765001	102.374	1.18296	0.384784	3.07435	0.0021096	0.0106522	Upregulated	HW_vs_CW	obesity_upregulated
Creb3l2	Ap1s2	TRUE	3	transfac_pro__M07679	3.04	r80__10kb_up_and_down_tss.mc9nr.feather	w0.005	0.6	0.00580771	1584.04	0.68555	0.159514	4.29774	1.72549e-05	0.000185305	Upregulated	HW_vs_CW	obesity_upregulated
Creb3l2	Armcx6	TRUE	2	transfac_pro__M07679	3.04	r80__10kb_up_and_down_tss.mc9nr.feather	w0.005	0.9	0.00652143	198.717	1.14338	0.404867	2.82409	0.00474157	0.0206494	Upregulated	HW_vs_CW	obesity_upregulated
Creb3l2	Atp6v0e2	TRUE	2	transfac_pro__M07679	3.04	r80__10kb_up_and_down_tss.mc9nr.feather	w0.005	0.9	0.00864823	3349.29	0.822468	0.228219	3.60386	0.000313531	0.0021895	Upregulated	HW_vs_CW	obesity_upregulated
Creb3l2	Chpf2	TRUE	2	transfac_pro__M07679	3.04	r80__10kb_up_and_down_tss.mc9nr.feather	w0.005	0.9	0.00687225	2493.69	0.860731	0.186957	4.60391	4.14629e-06	5.39209e-05	Upregulated	HW_vs_CW	obesity_upregulated
Creb3l2	Cit	TRUE	2	transfac_pro__M07679	3.04	r80__10kb_up_and_down_tss.mc9nr.feather	w0.005	0.9	0.0103875	273.084	1.06088	0.232485	4.56321	5.03786e-06	6.40379e-05	Upregulated	HW_vs_CW	obesity_upregulated
Creb3l2	Col5a1	TRUE	8	transfac_pro__M07679	3.04	r80__10kb_up_and_down_tss.mc9nr.feather	w0.005	0.4	0.00865642	13984.2	1.09129	0.266994	4.08733	4.36365e-05	0.000410912	Upregulated	HW_vs_CW	obesity_upregulated
Creb3l2	Cxcl14	TRUE	8	transfac_pro__M07679	3.04	r80__10kb_up_and_down_tss.mc9nr.feather	w0.005	0.6	0.00967955	1832.46	1.44902	0.233265	6.21191	5.23442e-10	1.83419e-08	Upregulated	HW_vs_CW	obesity_upregulated
Creb3l2	Fkbp11	TRUE	8	transfac_pro__M07679	3.04	r80__10kb_up_and_down_tss.mc9nr.feather	w0.005	0.9	0.00813468	123.807	1.19191	0.397266	3.00028	0.0026973	0.0130486	Upregulated	HW_vs_CW	obesity_upregulated
Creb3l2	Grb2	TRUE	7	transfac_pro__M07679	3.04	r80__10kb_up_and_down_tss.mc9nr.feather	w0.005	0.8	0.0115768	6848.97	0.510424	0.141729	3.60142	0.000316487	0.00220858	Upregulated	HW_vs_CW	obesity_upregulated
Creb3l2	Kcnh2	TRUE	2	transfac_pro__M07679	3.04	r80__10kb_up_and_down_tss.mc9nr.feather	w0.005	1	0.00920784	1195.01	2.41158	0.459837	5.24441	1.56783e-07	3.06542e-06	Upregulated	HW_vs_CW	obesity_upregulated
Creb3l2	Kdelr3	TRUE	5	transfac_pro__M07679	3.04	r80__10kb_up_and_down_tss.mc9nr.feather	w0.005	0.9	0.00881469	461.499	1.43728	0.198221	7.25089	4.14035e-13	2.60961e-11	Upregulated	HW_vs_CW	obesity_upregulated
Creb3l2	Mapre2	TRUE	2	transfac_pro__M07679	3.04	r80__10kb_up_and_down_tss.mc9nr.feather	w0.005	1	0.00588534	6327.64	0.648796	0.146869	4.41752	9.98404e-06	0.000115726	Upregulated	HW_vs_CW	obesity_upregulated
Creb3l2	Megf9	TRUE	2	transfac_pro__M07679	3.04	r80__10kb_up_and_down_tss.mc9nr.feather	w0.005	0.4	0.00970674	3931.64	0.658729	0.137419	4.79356	1.63844e-06	2.36974e-05	Upregulated	HW_vs_CW	obesity_upregulated
Creb3l2	Meox2	TRUE	2	transfac_pro__M07679	3.04	r80__10kb_up_and_down_tss.mc9nr.feather	w0.005	0.1	0.00665295	3070.35	0.837891	0.231365	3.62152	0.000292881	0.0020678	Upregulated	HW_vs_CW	obesity_upregulated
Creb3l2	Mirg	TRUE	8	transfac_pro__M07679	3.04	r80__10kb_up_and_down_tss.mc9nr.feather	w0.005	0.3	0.010009	90.0546	1.51417	0.513975	2.94601	0.00321907	0.0151276	Upregulated	HW_vs_CW	obesity_upregulated
Creb3l2	Nans	TRUE	2	transfac_pro__M07679	3.04	r80__10kb_up_and_down_tss.mc9nr.feather	w0.005	1	0.0101633	1989.33	0.993673	0.16982	5.85135	4.8761e-09	1.37226e-07	Upregulated	HW_vs_CW	obesity_upregulated
Creb3l2	Nfatc2	TRUE	2	transfac_pro__M07679	3.04	r80__10kb_up_and_down_tss.mc9nr.feather	w0.005	0.9	0.00585	1096.68	0.863904	0.236117	3.65879	0.00025341	0.00184	Upregulated	HW_vs_CW	obesity_upregulated
Creb3l2	Nos2	TRUE	3	transfac_pro__M07679	3.04	r80__10kb_up_and_down_tss.mc9nr.feather	w0.005	0.9	0.00863571	664.404	0.894021	0.345106	2.59057	0.00958179	0.0363518	Upregulated	HW_vs_CW	obesity_upregulated
Creb3l2	Ptprs	TRUE	3	transfac_pro__M07679	3.04	r80__10kb_up_and_down_tss.mc9nr.feather	w0.005	0.9	0.00520098	4106.51	1.48524	0.288089	5.15549	2.52965e-07	4.62511e-06	Upregulated	HW_vs_CW	obesity_upregulated
Creb3l2	Rcn1	TRUE	4	transfac_pro__M07679	3.04	r80__10kb_up_and_down_tss.mc9nr.feather	w0.005	1	0.0102175	3649.53	0.996094	0.315867	3.15352	0.00161315	0.00854344	Upregulated	HW_vs_CW	obesity_upregulated
Creb3l2	Reep5	TRUE	1	transfac_pro__M07679	3.04	r80__10kb_up_and_down_tss.mc9nr.feather	w0.005	0.8	0.00742045	28288.3	0.8178	0.143878	5.68399	1.31589e-08	3.34533e-07	Upregulated	HW_vs_CW	obesity_upregulated
Creb3l2	Sbk1	TRUE	6	transfac_pro__M07679	3.04	r80__10kb_up_and_down_tss.mc9nr.feather	w0.005	1	0.01174	1766.55	0.719553	0.184281	3.90466	9.43586e-05	0.00079756	Upregulated	HW_vs_CW	obesity_upregulated
Creb3l2	Scn8a	TRUE	1	transfac_pro__M07679	3.04	r80__10kb_up_and_down_tss.mc9nr.feather	w0.005	0.666886	0.00798058	134.752	1.96712	0.558866	3.51985	0.000431787	0.00285179	Upregulated	HW_vs_CW	obesity_upregulated
Creb3l2	Sec24d	TRUE	2	transfac_pro__M07679	3.04	r80__10kb_up_and_down_tss.mc9nr.feather	w0.005	0.9	0.00758358	5734.87	0.544593	0.154666	3.52109	0.000429778	0.00283947	Upregulated	HW_vs_CW	obesity_upregulated
Creb3l2	Sema4d	TRUE	5	transfac_pro__M07679	3.04	r80__10kb_up_and_down_tss.mc9nr.feather	w0.005	0.7	0.0210164	1207.06	1.64416	0.33312	4.93565	7.98834e-07	1.25874e-05	Upregulated	HW_vs_CW	obesity_upregulated
Creb3l2	Slc39a13	TRUE	2	transfac_pro__M07679	3.04	r80__10kb_up_and_down_tss.mc9nr.feather	w0.005	0.9	0.00609127	2035.56	0.520153	0.120397	4.3203	1.55819e-05	0.000170494	Upregulated	HW_vs_CW	obesity_upregulated
Creb3l2	Slc41a2	TRUE	2	transfac_pro__M07679	3.04	r80__10kb_up_and_down_tss.mc9nr.feather	w0.005	0.9	0.00716435	964.463	1.05334	0.248473	4.23924	2.24274e-05	0.000233113	Upregulated	HW_vs_CW	obesity_upregulated
Creb3l2	St18	TRUE	7	transfac_pro__M07679	3.04	r80__10kb_up_and_down_tss.mc9nr.feather	w0.005	0.7	0.0112797	61.7282	5.56218	1.01121	5.50052	3.78681e-08	8.69688e-07	Upregulated	HW_vs_CW	obesity_upregulated
Creb3l2	Sytl4	TRUE	3	transfac_pro__M07679	3.04	r80__10kb_up_and_down_tss.mc9nr.feather	w0.005	0.7	0.0087593	524.784	1.21168	0.33282	3.64063	0.000271967	0.00194397	Upregulated	HW_vs_CW	obesity_upregulated
Creb3l2	Tmem263	TRUE	9	transfac_pro__M07679	3.04	r80__10kb_up_and_down_tss.mc9nr.feather	w0.005	1	0.0101767	1415.68	0.627727	0.117816	5.32804	9.92789e-08	2.05567e-06	Upregulated	HW_vs_CW	obesity_upregulated
Creb3l2	Xkr6	TRUE	7	transfac_pro__M07679	3.04	r80__10kb_up_and_down_tss.mc9nr.feather	w0.005	0.9	0.00941325	157.341	1.08628	0.404876	2.68301	0.00729637	0.0291618	Upregulated	HW_vs_CW	obesity_upregulated
Dbp	Bhlhe40	TRUE	29	taipale_cyt_meth__DBP_NRTTAYGTAAYN_eDBD	3.82	r80__10kb_up_and_down_tss.mc9nr.feather	top1sdAndtop10perTarget	0.8	0.0236002	2320.51	1.43227	0.346172	4.13746	3.51166e-05	0.000342419	Upregulated	HW_vs_CW	obesity_upregulated
Dbp	Mid1ip1	TRUE	31	taipale_cyt_meth__DBP_NRTTAYGTAAYN_eDBD	3.82	r80__10kb_up_and_down_tss.mc9nr.feather	top1sdAndtop10perTarget	0.7	0.0160517	1474.18	0.567937	0.193073	2.94156	0.00326565	0.0153064	Upregulated	HW_vs_CW	obesity_upregulated
Dbp	Nr1d1	TRUE	42	taipale_cyt_meth__DBP_NRTTAYGTAAYN_eDBD	3.82	r80__10kb_up_and_down_tss.mc9nr.feather	top1sdAndtop10perTarget	0.8	0.0336818	9327.87	1.70247	0.199351	8.54006	1.34149e-17	1.82517e-15	Upregulated	HW_vs_CW	obesity_upregulated
Dbp	Nr1d2	TRUE	41	taipale_cyt_meth__DBP_NRTTAYGTAAYN_eDBD	3.82	r80__10kb_up_and_down_tss.mc9nr.feather	top1sdAndtop10perTarget	1	0.0326433	6535.51	1.53509	0.209368	7.332	2.26746e-13	1.51635e-11	Upregulated	HW_vs_CW	obesity_upregulated
Dbp	Per2	TRUE	41	taipale_cyt_meth__DBP_NRTTAYGTAAYN_eDBD	3.82	r80__10kb_up_and_down_tss.mc9nr.feather	top1sdAndtop10perTarget	0.9	0.0186571	3889.26	0.812845	0.305842	2.65772	0.00786701	0.0309612	Upregulated	HW_vs_CW	obesity_upregulated
Dbp	Klhl8	TRUE	3	cisbp__M6186	3.65	r80__10kb_up_and_down_tss.mc9nr.feather	top1sdAndtop10perTarget	0.8	0.017495	1231.66	0.565944	0.202579	2.7937	0.00521091	0.0222609	Upregulated	HW_vs_CW	obesity_upregulated
Dbp	Map2k6	TRUE	4	cisbp__M6186	3.65	r80__10kb_up_and_down_tss.mc9nr.feather	top1sdAndtop10perTarget	0.8	0.018203	254.249	2.09555	0.285839	7.33124	2.28041e-13	1.51986e-11	Upregulated	HW_vs_CW	obesity_upregulated
Dbp	1700025G04Rik	TRUE	9	hocomoco__DBP_HUMAN.H11MO.0.B	3.41	r80__10kb_up_and_down_tss.mc9nr.feather	top1sdAndtop10perTarget	0.6	0.0200156	1501.8	0.87489	0.356212	2.45609	0.0140457	0.0491999	Upregulated	HW_vs_CW	obesity_upregulated
Dbp	Ankrd6	TRUE	7	hocomoco__DBP_HUMAN.H11MO.0.B	3.41	r80__10kb_up_and_down_tss.mc9nr.feather	top1sdAndtop10perTarget	0.9	0.0222761	244.856	0.739954	0.264944	2.79287	0.00522432	0.0223037	Upregulated	HW_vs_CW	obesity_upregulated
Dbp	Cacna2d1	TRUE	1	hocomoco__DBP_HUMAN.H11MO.0.B	3.41	r80__10kb_up_and_down_tss.mc9nr.feather	top1sdAndtop10perTarget	0.7	0.0213502	3318.25	1.85	0.565811	3.26964	0.00107684	0.0061257	Upregulated	HW_vs_CW	obesity_upregulated
Dbp	Cnga3	TRUE	3	hocomoco__DBP_HUMAN.H11MO.0.B	3.41	r80__10kb_up_and_down_tss.mc9nr.feather	top1sdAndtop10perTarget	0.974679	0.0338857	12.5698	6.86057	1.84234	3.72383	0.000196221	0.00148772	Upregulated	HW_vs_CW	obesity_upregulated
Dbp	Cpeb3	TRUE	14	hocomoco__DBP_HUMAN.H11MO.0.B	3.41	r80__10kb_up_and_down_tss.mc9nr.feather	top1sdAndtop10perTarget	0.9	0.0282209	1772.88	0.531387	0.181701	2.92451	0.00345003	0.0159846	Upregulated	HW_vs_CW	obesity_upregulated
Dbp	Dbp	TRUE	6	hocomoco__DBP_HUMAN.H11MO.0.B	3.41	r80__10kb_up_and_down_tss.mc9nr.feather	top1sdAndtop10perTarget	1	NA	3093.23	4.51913	0.221496	20.4028	1.57972e-92	1.03882e-88	Upregulated	HW_vs_CW	obesity_upregulated
Dbp	Dll4	TRUE	10	hocomoco__DBP_HUMAN.H11MO.0.B	3.41	r80__10kb_up_and_down_tss.mc9nr.feather	top1sdAndtop10perTarget	0.9	0.0205067	1440.02	1.24188	0.0975079	12.7362	3.72046e-37	4.07762e-34	Upregulated	HW_vs_CW	obesity_upregulated
Dbp	Scml2	TRUE	7	hocomoco__DBP_HUMAN.H11MO.0.B	3.41	r80__10kb_up_and_down_tss.mc9nr.feather	top1sdAndtop10perTarget	0.9	0.0205965	59.5398	1.39265	0.346361	4.02081	5.79986e-05	0.000523181	Upregulated	HW_vs_CW	obesity_upregulated
Dbp	Snhg14	TRUE	1	hocomoco__DBP_HUMAN.H11MO.0.B	3.41	r80__10kb_up_and_down_tss.mc9nr.feather	top1sdAndtop10perTarget	0.7	0.0301192	175.854	0.760022	0.218063	3.48533	0.000491535	0.00317414	Upregulated	HW_vs_CW	obesity_upregulated
Dbp	Snrpn	TRUE	9	hocomoco__DBP_HUMAN.H11MO.0.B	3.41	r80__10kb_up_and_down_tss.mc9nr.feather	top1sdAndtop10perTarget	0.6	0.0213909	665.302	0.728681	0.205145	3.55204	0.000382259	0.00257643	Upregulated	HW_vs_CW	obesity_upregulated
Dbp	Tnik	TRUE	1	hocomoco__DBP_HUMAN.H11MO.0.B	3.41	r80__10kb_up_and_down_tss.mc9nr.feather	top1sdAndtop10perTarget	0.6	0.0245035	501.522	1.10761	0.430882	2.57057	0.0101531	0.0380511	Upregulated	HW_vs_CW	obesity_upregulated
Dbp	Traf3	TRUE	5	hocomoco__DBP_HUMAN.H11MO.0.B	3.41	r80__10kb_up_and_down_tss.mc9nr.feather	top1sdAndtop10perTarget	0.4	0.0155103	1826.27	1.02634	0.173777	5.90609	3.50318e-09	1.0269e-07	Upregulated	HW_vs_CW	obesity_upregulated
Dbp	4930429F24Rik	TRUE	1	tfdimers__MD00579	3.4	r80__10kb_up_and_down_tss.mc9nr.feather	w0.005	0.6	0.0151136	164.809	1.04133	0.421799	2.46878	0.0135575	0.0478807	Upregulated	HW_vs_CW	obesity_upregulated
Dbp	Adamts17	TRUE	1	tfdimers__MD00579	3.4	r80__10kb_up_and_down_tss.mc9nr.feather	w0.005	0.8	0.0143804	92.8925	2.13255	0.472765	4.5108	6.45849e-06	7.97828e-05	Upregulated	HW_vs_CW	obesity_upregulated
Dbp	Ajuba	TRUE	1	tfdimers__MD00579	3.4	r80__10kb_up_and_down_tss.mc9nr.feather	w0.005	0.3	0.00559395	1581.67	0.855571	0.281877	3.03527	0.00240324	0.0118528	Upregulated	HW_vs_CW	obesity_upregulated
Dbp	Armcx2	TRUE	1	tfdimers__MD00579	3.4	r80__10kb_up_and_down_tss.mc9nr.feather	w0.005	0.9	0.0176445	1549.9	0.835105	0.313948	2.66001	0.00781381	0.0308181	Upregulated	HW_vs_CW	obesity_upregulated
Dbp	B130024G19Rik	TRUE	2	tfdimers__MD00579	3.4	r80__10kb_up_and_down_tss.mc9nr.feather	w0.005	0.7	0.0146007	136.854	0.849417	0.310497	2.73567	0.00622541	0.0257258	Upregulated	HW_vs_CW	obesity_upregulated
Dbp	B3gat1	TRUE	1	tfdimers__MD00579	3.4	r80__10kb_up_and_down_tss.mc9nr.feather	w0.005	0.3	0.00711968	18.3102	2.43958	0.645836	3.77741	0.000158471	0.00124109	Upregulated	HW_vs_CW	obesity_upregulated
Dbp	Bsn	TRUE	1	tfdimers__MD00579	3.4	r80__10kb_up_and_down_tss.mc9nr.feather	w0.005	0.1	0.0077828	232.453	1.43926	0.393278	3.65965	0.000252563	0.0018352	Upregulated	HW_vs_CW	obesity_upregulated
Dbp	Chst2	TRUE	1	tfdimers__MD00579	3.4	r80__10kb_up_and_down_tss.mc9nr.feather	w0.005	1	0.00905296	494.875	0.943551	0.35932	2.62593	0.00864123	0.0334525	Upregulated	HW_vs_CW	obesity_upregulated
Dbp	Cntln	TRUE	1	tfdimers__MD00579	3.4	r80__10kb_up_and_down_tss.mc9nr.feather	w0.005	0.4	0.00923924	1519.62	0.653437	0.188018	3.47539	0.000510116	0.0032727	Upregulated	HW_vs_CW	obesity_upregulated
Dbp	Col22a1	TRUE	1	tfdimers__MD00579	3.4	r80__10kb_up_and_down_tss.mc9nr.feather	w0.005	0.5	0.00886459	37.0847	3.83273	1.14821	3.33801	0.000843797	0.00499143	Upregulated	HW_vs_CW	obesity_upregulated
Dbp	Cux2	TRUE	1	tfdimers__MD00579	3.4	r80__10kb_up_and_down_tss.mc9nr.feather	w0.005	0.1	0.00664367	308.138	2.00134	0.71864	2.7849	0.0053544	0.0227507	Upregulated	HW_vs_CW	obesity_upregulated
Dbp	Dazl	TRUE	1	tfdimers__MD00579	3.4	r80__10kb_up_and_down_tss.mc9nr.feather	w0.005	0.5	0.00660324	12.0164	2.1063	0.828185	2.54327	0.010982	0.0404579	Upregulated	HW_vs_CW	obesity_upregulated
Dbp	Erich3	TRUE	1	tfdimers__MD00579	3.4	r80__10kb_up_and_down_tss.mc9nr.feather	w0.005	0.820783	0.00661148	22.7366	2.71728	0.787301	3.45138	0.000557726	0.00353129	Upregulated	HW_vs_CW	obesity_upregulated
Dbp	Filip1	TRUE	2	tfdimers__MD00579	3.4	r80__10kb_up_and_down_tss.mc9nr.feather	w0.005	0.6	0.0296255	1861.4	0.749396	0.240837	3.11164	0.00186052	0.00961349	Upregulated	HW_vs_CW	obesity_upregulated
Dbp	Fkbp14	TRUE	1	tfdimers__MD00579	3.4	r80__10kb_up_and_down_tss.mc9nr.feather	w0.005	0.7	0.0121298	1231.83	0.838915	0.140907	5.95367	2.622e-09	7.82553e-08	Upregulated	HW_vs_CW	obesity_upregulated
Dbp	Gimap1	TRUE	1	tfdimers__MD00579	3.4	r80__10kb_up_and_down_tss.mc9nr.feather	w0.005	0.9	0.0192777	563.038	0.570122	0.104238	5.46944	4.51472e-08	1.01442e-06	Upregulated	HW_vs_CW	obesity_upregulated
Dbp	Kcnh2	TRUE	1	tfdimers__MD00579	3.4	r80__10kb_up_and_down_tss.mc9nr.feather	w0.005	0.4	0.00672552	1195.01	2.41158	0.459837	5.24441	1.56783e-07	3.06542e-06	Upregulated	HW_vs_CW	obesity_upregulated
Dbp	Mapkap1	TRUE	1	tfdimers__MD00579	3.4	r80__10kb_up_and_down_tss.mc9nr.feather	w0.005	0.5	0.00682775	2960.91	0.665169	0.133003	5.00115	5.69906e-07	9.44798e-06	Upregulated	HW_vs_CW	obesity_upregulated
Dbp	Mef2c	TRUE	6	tfdimers__MD00579	3.4	r80__10kb_up_and_down_tss.mc9nr.feather	w0.005	0.6	0.00998333	4064.35	1.14368	0.347125	3.29473	0.000985171	0.0056962	Upregulated	HW_vs_CW	obesity_upregulated
Dbp	Mfsd13a	TRUE	1	tfdimers__MD00579	3.4	r80__10kb_up_and_down_tss.mc9nr.feather	w0.005	0.4	0.010458	383.37	0.785707	0.175108	4.48699	7.22379e-06	8.79154e-05	Upregulated	HW_vs_CW	obesity_upregulated
Dbp	Morf4l2	TRUE	1	tfdimers__MD00579	3.4	r80__10kb_up_and_down_tss.mc9nr.feather	w0.005	0.7	0.00836671	10463.3	0.500236	0.110644	4.52114	6.15082e-06	7.65574e-05	Upregulated	HW_vs_CW	obesity_upregulated
Dbp	Neurl1b	TRUE	5	tfdimers__MD00579	3.4	r80__10kb_up_and_down_tss.mc9nr.feather	w0.005	0.3	0.0123638	1149.32	0.661764	0.188143	3.51734	0.000435891	0.00287601	Upregulated	HW_vs_CW	obesity_upregulated
Dbp	Pak1	TRUE	1	tfdimers__MD00579	3.4	r80__10kb_up_and_down_tss.mc9nr.feather	w0.005	0.4	0.00595335	692.985	0.869548	0.353132	2.46239	0.0138015	0.0485427	Upregulated	HW_vs_CW	obesity_upregulated
Dbp	Paqr7	TRUE	1	tfdimers__MD00579	3.4	r80__10kb_up_and_down_tss.mc9nr.feather	w0.005	0.3	0.00578537	2121.6	1.7537	0.206928	8.47493	2.35218e-17	3.0731e-15	Upregulated	HW_vs_CW	obesity_upregulated
Dbp	Plekha7	TRUE	1	tfdimers__MD00579	3.4	r80__10kb_up_and_down_tss.mc9nr.feather	w0.005	0.4	0.00528594	1203.95	0.978265	0.319503	3.06183	0.00219985	0.0110419	Upregulated	HW_vs_CW	obesity_upregulated
Dbp	Ptprs	TRUE	2	tfdimers__MD00579	3.4	r80__10kb_up_and_down_tss.mc9nr.feather	w0.005	0.3	0.0106943	4106.51	1.48524	0.288089	5.15549	2.52965e-07	4.62511e-06	Upregulated	HW_vs_CW	obesity_upregulated
Dbp	Trerf1	TRUE	1	tfdimers__MD00579	3.4	r80__10kb_up_and_down_tss.mc9nr.feather	w0.005	0.1	0.00592321	1345.85	1.36004	0.302999	4.48859	7.16955e-06	8.73091e-05	Upregulated	HW_vs_CW	obesity_upregulated
Dbp	Zfp133-ps	TRUE	1	tfdimers__MD00579	3.4	r80__10kb_up_and_down_tss.mc9nr.feather	w0.005	0.5	0.00814884	54.7188	0.910855	0.289256	3.14896	0.00163853	0.00865924	Upregulated	HW_vs_CW	obesity_upregulated
Dbp	Aldh1a2	TRUE	5	hocomoco__DBP_HUMAN.H11MO.0.B	3.22	r80__500bp_up_and_100bp_down_tss.mc9nr.feather	top50perTarget	0.1	0.00723329	1113.49	1.36906	0.377572	3.62596	0.000287891	0.00203859	Upregulated	HW_vs_CW	obesity_upregulated
Dbp	Azin2	TRUE	5	hocomoco__DBP_HUMAN.H11MO.0.B	3.22	r80__500bp_up_and_100bp_down_tss.mc9nr.feather	top50perTarget	0.4	0.0116738	952.554	0.836818	0.283592	2.95078	0.00316977	0.0149529	Upregulated	HW_vs_CW	obesity_upregulated
Dbp	D330050G23Rik	TRUE	2	hocomoco__DBP_HUMAN.H11MO.0.B	3.22	r80__500bp_up_and_100bp_down_tss.mc9nr.feather	top50perTarget	0.5	0.00995151	33.0523	2.40433	0.660257	3.64151	0.000271047	0.00194017	Upregulated	HW_vs_CW	obesity_upregulated
Dbp	D5Ertd579e	TRUE	5	hocomoco__DBP_HUMAN.H11MO.0.B	3.22	r80__500bp_up_and_100bp_down_tss.mc9nr.feather	top50perTarget	0.8	0.0134428	9093.08	0.722666	0.111186	6.49964	8.05145e-11	3.40856e-09	Upregulated	HW_vs_CW	obesity_upregulated
Dbp	Nfib	TRUE	5	hocomoco__DBP_HUMAN.H11MO.0.B	3.22	r80__500bp_up_and_100bp_down_tss.mc9nr.feather	top50perTarget	0.9	0.00977367	8538.4	0.638757	0.0671118	9.5178	1.76886e-21	4.7157e-19	Upregulated	HW_vs_CW	obesity_upregulated
Dbp	Per3	TRUE	5	hocomoco__DBP_HUMAN.H11MO.0.B	3.22	r80__500bp_up_and_100bp_down_tss.mc9nr.feather	top50perTarget	0.9	0.0155298	3256.42	1.5324	0.210418	7.28261	3.27415e-13	2.11779e-11	Upregulated	HW_vs_CW	obesity_upregulated
Dbp	Pycr1	TRUE	3	hocomoco__DBP_HUMAN.H11MO.0.B	3.22	r80__500bp_up_and_100bp_down_tss.mc9nr.feather	top50perTarget	0.4	0.0114602	213.452	2.677	0.379929	7.04603	1.84092e-12	1.03764e-10	Upregulated	HW_vs_CW	obesity_upregulated
Dbp	Smarca1	TRUE	6	hocomoco__DBP_HUMAN.H11MO.0.B	3.22	r80__500bp_up_and_100bp_down_tss.mc9nr.feather	top50perTarget	0.7	0.0221176	416.484	2.48186	0.808221	3.07076	0.00213512	0.0107618	Upregulated	HW_vs_CW	obesity_upregulated
Dbp	Sned1	TRUE	2	hocomoco__DBP_HUMAN.H11MO.0.B	3.22	r80__500bp_up_and_100bp_down_tss.mc9nr.feather	top50perTarget	0.4	0.0149459	1408.93	0.659247	0.161311	4.0868	4.37369e-05	0.000411327	Upregulated	HW_vs_CW	obesity_upregulated
Dbp	Tef	TRUE	2	hocomoco__DBP_HUMAN.H11MO.0.B	3.22	r80__500bp_up_and_100bp_down_tss.mc9nr.feather	top50perTarget	0.9	0.0163415	11827.6	1.24985	0.20376	6.13391	8.57459e-10	2.86711e-08	Upregulated	HW_vs_CW	obesity_upregulated
Dbp	Ank2	TRUE	2	transfac_pro__M07038	3.13	r80__500bp_up_and_100bp_down_tss.mc9nr.feather	top50perTarget	0.8	0.00436256	2545.22	0.986108	0.211016	4.67315	2.96621e-06	4.03847e-05	Upregulated	HW_vs_CW	obesity_upregulated
Dbp	Eya1	TRUE	2	transfac_pro__M07038	3.13	r80__500bp_up_and_100bp_down_tss.mc9nr.feather	top50perTarget	0.9	0.0102614	301.636	2.16266	0.489633	4.4169	1.00126e-05	0.000115974	Upregulated	HW_vs_CW	obesity_upregulated
Dbp	Tenm4	TRUE	3	transfac_pro__M07038	3.13	r80__500bp_up_and_100bp_down_tss.mc9nr.feather	top50perTarget	0.5	0.00736999	13755.5	1.91131	0.292784	6.52806	6.66263e-11	2.88246e-09	Upregulated	HW_vs_CW	obesity_upregulated
Dbp	Utp14b	TRUE	1	transfac_pro__M07038	3.13	r80__500bp_up_and_100bp_down_tss.mc9nr.feather	top50perTarget	0.666886	0.0101149	471.36	0.519228	0.110751	4.68824	2.7556e-06	3.77779e-05	Upregulated	HW_vs_CW	obesity_upregulated
Dbp	Vldlr	TRUE	2	transfac_pro__M07038	3.13	r80__500bp_up_and_100bp_down_tss.mc9nr.feather	top50perTarget	0.2	0.00401362	11139.1	0.614377	0.212262	2.89443	0.00379852	0.0172428	Upregulated	HW_vs_CW	obesity_upregulated
E2f1	Dock10	TRUE	26	transfac_pro__M00919	4.78	r80__10kb_up_and_down_tss.mc9nr.feather	top50	0.9	0.0187009	3252.78	1.22306	0.216768	5.64226	1.67833e-08	4.14394e-07	Upregulated	HW_vs_CW	obesity_upregulated
E2f1	E2f1	TRUE	76	transfac_pro__M00919	4.78	r80__10kb_up_and_down_tss.mc9nr.feather	top50	1	NA	937.562	1.38249	0.319895	4.32169	1.54838e-05	0.000169608	Upregulated	HW_vs_CW	obesity_upregulated
E2f1	E2f2	TRUE	74	transfac_pro__M00919	4.78	r80__10kb_up_and_down_tss.mc9nr.feather	top50	0.6	0.0205673	181.326	1.4183	0.341802	4.1495	3.33208e-05	0.000328348	Upregulated	HW_vs_CW	obesity_upregulated
E2f1	Nfatc2	TRUE	17	transfac_pro__M00919	4.78	r80__10kb_up_and_down_tss.mc9nr.feather	top50	0.9	0.0186145	1096.68	0.863904	0.236117	3.65879	0.00025341	0.00184	Upregulated	HW_vs_CW	obesity_upregulated
E2f1	Peg10	TRUE	36	transfac_pro__M00919	4.78	r80__10kb_up_and_down_tss.mc9nr.feather	top50	0.9	0.0230982	5442.65	3.47012	0.872792	3.97588	7.01188e-05	0.000617547	Upregulated	HW_vs_CW	obesity_upregulated
E2f1	Prrx1	TRUE	27	transfac_pro__M00919	4.78	r80__10kb_up_and_down_tss.mc9nr.feather	top50	0.2	0.0182863	4435.37	0.620645	0.222283	2.79214	0.00523607	0.0223442	Upregulated	HW_vs_CW	obesity_upregulated
E2f1	Smc2	TRUE	22	transfac_pro__M00919	4.78	r80__10kb_up_and_down_tss.mc9nr.feather	top50	1	0.0174144	741.62	1.27486	0.145558	8.75844	1.97966e-18	3.25456e-16	Upregulated	HW_vs_CW	obesity_upregulated
E2f1	2210016F16Rik	TRUE	6	homer__CWGGCGGGAA_E2F1	4.48	r80__500bp_up_and_100bp_down_tss.mc9nr.feather	top50perTarget	1	0.00882322	2762.56	0.508754	0.162453	3.13169	0.00173804	0.00907812	Upregulated	HW_vs_CW	obesity_upregulated
E2f1	2610020C07Rik	TRUE	1	homer__CWGGCGGGAA_E2F1	4.48	r80__500bp_up_and_100bp_down_tss.mc9nr.feather	top50perTarget	1	0.00860894	61.1442	1.18608	0.412627	2.87447	0.00404708	0.0182035	Upregulated	HW_vs_CW	obesity_upregulated
E2f1	9030624G23Rik	TRUE	4	homer__CWGGCGGGAA_E2F1	4.48	r80__500bp_up_and_100bp_down_tss.mc9nr.feather	top50perTarget	0.2	0.0175725	30.1923	1.4478	0.44602	3.24604	0.00117022	0.0065679	Upregulated	HW_vs_CW	obesity_upregulated
E2f1	Adamts17	TRUE	12	homer__CWGGCGGGAA_E2F1	4.48	r80__500bp_up_and_100bp_down_tss.mc9nr.feather	top50perTarget	0.4	0.00638595	92.8925	2.13255	0.472765	4.5108	6.45849e-06	7.97828e-05	Upregulated	HW_vs_CW	obesity_upregulated
E2f1	Adcy7	TRUE	7	homer__CWGGCGGGAA_E2F1	4.48	r80__500bp_up_and_100bp_down_tss.mc9nr.feather	top50perTarget	0.9	0.0164115	3619.78	1.76013	0.314089	5.60393	2.09544e-08	5.10356e-07	Upregulated	HW_vs_CW	obesity_upregulated
E2f1	Amer1	TRUE	11	homer__CWGGCGGGAA_E2F1	4.48	r80__500bp_up_and_100bp_down_tss.mc9nr.feather	top50perTarget	0.4	0.0144051	1573.14	0.968638	0.184948	5.23735	1.62895e-07	3.17234e-06	Upregulated	HW_vs_CW	obesity_upregulated
E2f1	Angptl1	TRUE	8	homer__CWGGCGGGAA_E2F1	4.48	r80__500bp_up_and_100bp_down_tss.mc9nr.feather	top50perTarget	0.7	0.00954407	400.928	1.39173	0.246617	5.6433	1.66822e-08	4.12415e-07	Upregulated	HW_vs_CW	obesity_upregulated
E2f1	Ankrd37	TRUE	2	homer__CWGGCGGGAA_E2F1	4.48	r80__500bp_up_and_100bp_down_tss.mc9nr.feather	top50perTarget	0.7	0.00720945	22.4532	1.54827	0.417905	3.70484	0.000211522	0.00158425	Upregulated	HW_vs_CW	obesity_upregulated
E2f1	Anxa6	TRUE	7	homer__CWGGCGGGAA_E2F1	4.48	r80__500bp_up_and_100bp_down_tss.mc9nr.feather	top50perTarget	0.6	0.00849519	41574.7	0.967326	0.222233	4.35275	1.34442e-05	0.000149897	Upregulated	HW_vs_CW	obesity_upregulated
E2f1	Ap1s1	TRUE	19	homer__CWGGCGGGAA_E2F1	4.48	r80__500bp_up_and_100bp_down_tss.mc9nr.feather	top50perTarget	0.9	0.00940958	3773.62	0.63383	0.14745	4.29861	1.71871e-05	0.000184678	Upregulated	HW_vs_CW	obesity_upregulated
E2f1	Ap1s2	TRUE	5	homer__CWGGCGGGAA_E2F1	4.48	r80__500bp_up_and_100bp_down_tss.mc9nr.feather	top50perTarget	0.6	0.00989758	1584.04	0.68555	0.159514	4.29774	1.72549e-05	0.000185305	Upregulated	HW_vs_CW	obesity_upregulated
E2f1	Arg1	TRUE	2	homer__CWGGCGGGAA_E2F1	4.48	r80__500bp_up_and_100bp_down_tss.mc9nr.feather	top50perTarget	0.6	0.0134422	130.709	1.62489	0.616279	2.63662	0.00837363	0.0326279	Upregulated	HW_vs_CW	obesity_upregulated
E2f1	Arhgap25	TRUE	4	homer__CWGGCGGGAA_E2F1	4.48	r80__500bp_up_and_100bp_down_tss.mc9nr.feather	top50perTarget	0.9	0.0153038	2632.4	2.08441	0.336677	6.19114	5.97319e-10	2.06735e-08	Upregulated	HW_vs_CW	obesity_upregulated
E2f1	Arhgap30	TRUE	4	homer__CWGGCGGGAA_E2F1	4.48	r80__500bp_up_and_100bp_down_tss.mc9nr.feather	top50perTarget	0.8	0.0117778	2858.69	0.829676	0.308597	2.68854	0.00717649	0.0287585	Upregulated	HW_vs_CW	obesity_upregulated
E2f1	Arhgap6	TRUE	35	homer__CWGGCGGGAA_E2F1	4.48	r80__500bp_up_and_100bp_down_tss.mc9nr.feather	top50perTarget	0.9	0.0185758	764.633	0.518375	0.165041	3.14088	0.00168441	0.00884012	Upregulated	HW_vs_CW	obesity_upregulated
E2f1	Arhgdib	TRUE	4	homer__CWGGCGGGAA_E2F1	4.48	r80__500bp_up_and_100bp_down_tss.mc9nr.feather	top50perTarget	0.8	0.00974397	2792.01	0.779942	0.268357	2.90636	0.00365663	0.0167296	Upregulated	HW_vs_CW	obesity_upregulated
E2f1	Arsi	TRUE	8	homer__CWGGCGGGAA_E2F1	4.48	r80__500bp_up_and_100bp_down_tss.mc9nr.feather	top50perTarget	0.7	0.0126835	595.637	1.18353	0.397873	2.97465	0.00293325	0.0139911	Upregulated	HW_vs_CW	obesity_upregulated
E2f1	Arvcf	TRUE	6	homer__CWGGCGGGAA_E2F1	4.48	r80__500bp_up_and_100bp_down_tss.mc9nr.feather	top50perTarget	0.6	0.0171612	1137.08	0.685838	0.247866	2.76697	0.00565797	0.0237996	Upregulated	HW_vs_CW	obesity_upregulated
E2f1	Asf1b	TRUE	13	homer__CWGGCGGGAA_E2F1	4.48	r80__500bp_up_and_100bp_down_tss.mc9nr.feather	top50perTarget	0.9	0.0101127	155.752	1.24151	0.353026	3.51675	0.000436865	0.00288147	Upregulated	HW_vs_CW	obesity_upregulated
E2f1	Aspm	TRUE	7	homer__CWGGCGGGAA_E2F1	4.48	r80__500bp_up_and_100bp_down_tss.mc9nr.feather	top50perTarget	0.6	0.0101769	193.927	1.6314	0.398415	4.09472	4.22679e-05	0.000401087	Upregulated	HW_vs_CW	obesity_upregulated
E2f1	Atad2	TRUE	45	homer__CWGGCGGGAA_E2F1	4.48	r80__500bp_up_and_100bp_down_tss.mc9nr.feather	top50perTarget	0.7	0.0131812	928.942	0.611163	0.156978	3.89331	9.88874e-05	0.000829796	Upregulated	HW_vs_CW	obesity_upregulated
E2f1	Atad5	TRUE	39	homer__CWGGCGGGAA_E2F1	4.48	r80__500bp_up_and_100bp_down_tss.mc9nr.feather	top50perTarget	0.8	0.0133205	256.929	0.721713	0.258022	2.7971	0.00515631	0.0220946	Upregulated	HW_vs_CW	obesity_upregulated
E2f1	Atp6v0a1	TRUE	5	homer__CWGGCGGGAA_E2F1	4.48	r80__500bp_up_and_100bp_down_tss.mc9nr.feather	top50perTarget	1	0.0118625	12215.1	1.12709	0.210399	5.3569	8.46605e-08	1.7882e-06	Upregulated	HW_vs_CW	obesity_upregulated
E2f1	Aurka	TRUE	15	homer__CWGGCGGGAA_E2F1	4.48	r80__500bp_up_and_100bp_down_tss.mc9nr.feather	top50perTarget	0.7	0.00855354	178.475	0.63908	0.22402	2.85278	0.00433389	0.0192176	Upregulated	HW_vs_CW	obesity_upregulated
E2f1	Aurkb	TRUE	9	homer__CWGGCGGGAA_E2F1	4.48	r80__500bp_up_and_100bp_down_tss.mc9nr.feather	top50perTarget	0.7	0.0101115	165.814	1.78324	0.351113	5.07883	3.79772e-07	6.5952e-06	Upregulated	HW_vs_CW	obesity_upregulated
E2f1	B3glct	TRUE	5	homer__CWGGCGGGAA_E2F1	4.48	r80__500bp_up_and_100bp_down_tss.mc9nr.feather	top50perTarget	0.8	0.008287	2016.56	0.552305	0.198936	2.77629	0.00549824	0.0232617	Upregulated	HW_vs_CW	obesity_upregulated
E2f1	B3gnt9	TRUE	4	homer__CWGGCGGGAA_E2F1	4.48	r80__500bp_up_and_100bp_down_tss.mc9nr.feather	top50perTarget	0.9	0.0132604	468.118	0.705333	0.194248	3.6311	0.00028222	0.00200708	Upregulated	HW_vs_CW	obesity_upregulated
E2f1	B4galnt1	TRUE	18	homer__CWGGCGGGAA_E2F1	4.48	r80__500bp_up_and_100bp_down_tss.mc9nr.feather	top50perTarget	0.7	0.0151785	700.429	1.3576	0.32168	4.22035	2.43918e-05	0.000249845	Upregulated	HW_vs_CW	obesity_upregulated
E2f1	Bahcc1	TRUE	24	homer__CWGGCGGGAA_E2F1	4.48	r80__500bp_up_and_100bp_down_tss.mc9nr.feather	top50perTarget	0.5	0.00926583	2053.31	1.13392	0.360898	3.14195	0.00167828	0.00882281	Upregulated	HW_vs_CW	obesity_upregulated
E2f1	Bdnf	TRUE	23	homer__CWGGCGGGAA_E2F1	4.48	r80__500bp_up_and_100bp_down_tss.mc9nr.feather	top50perTarget	0.7	0.010278	136.106	2.00608	0.559342	3.58649	0.000335156	0.00231349	Upregulated	HW_vs_CW	obesity_upregulated
E2f1	C1qtnf2	TRUE	9	homer__CWGGCGGGAA_E2F1	4.48	r80__500bp_up_and_100bp_down_tss.mc9nr.feather	top50perTarget	0.8	0.00963987	356.653	0.567322	0.181454	3.12654	0.00176879	0.00921431	Upregulated	HW_vs_CW	obesity_upregulated
E2f1	Calm2	TRUE	17	homer__CWGGCGGGAA_E2F1	4.48	r80__500bp_up_and_100bp_down_tss.mc9nr.feather	top50perTarget	0.8	0.0123534	15782.3	0.654261	0.139243	4.69868	2.61849e-06	3.61622e-05	Upregulated	HW_vs_CW	obesity_upregulated
E2f1	Camk1	TRUE	10	homer__CWGGCGGGAA_E2F1	4.48	r80__500bp_up_and_100bp_down_tss.mc9nr.feather	top50perTarget	0.9	0.0103786	5538.05	0.625954	0.175491	3.56687	0.000361267	0.00246271	Upregulated	HW_vs_CW	obesity_upregulated
E2f1	Ccdc102a	TRUE	11	homer__CWGGCGGGAA_E2F1	4.48	r80__500bp_up_and_100bp_down_tss.mc9nr.feather	top50perTarget	0.7	0.0145659	918.424	0.626528	0.198118	3.16239	0.00156479	0.00833877	Upregulated	HW_vs_CW	obesity_upregulated
E2f1	Ccdc3	TRUE	2	homer__CWGGCGGGAA_E2F1	4.48	r80__500bp_up_and_100bp_down_tss.mc9nr.feather	top50perTarget	0.7	0.0108214	3812.4	0.784236	0.19614	3.99835	6.37844e-05	0.000567328	Upregulated	HW_vs_CW	obesity_upregulated
E2f1	Ccdc88a	TRUE	9	homer__CWGGCGGGAA_E2F1	4.48	r80__500bp_up_and_100bp_down_tss.mc9nr.feather	top50perTarget	1	0.0132048	1716.82	0.7164	0.149245	4.80016	1.5854e-06	2.29976e-05	Upregulated	HW_vs_CW	obesity_upregulated
E2f1	Ccser2	TRUE	5	homer__CWGGCGGGAA_E2F1	4.48	r80__500bp_up_and_100bp_down_tss.mc9nr.feather	top50perTarget	1	0.00988876	10146	0.701635	0.131907	5.31918	1.04235e-07	2.13758e-06	Upregulated	HW_vs_CW	obesity_upregulated
E2f1	Cd74	TRUE	3	homer__CWGGCGGGAA_E2F1	4.48	r80__500bp_up_and_100bp_down_tss.mc9nr.feather	top50perTarget	0.8	0.011351	58893.9	0.691553	0.272266	2.53999	0.0110857	0.0407183	Upregulated	HW_vs_CW	obesity_upregulated
E2f1	Cdc42ep1	TRUE	6	homer__CWGGCGGGAA_E2F1	4.48	r80__500bp_up_and_100bp_down_tss.mc9nr.feather	top50perTarget	0.6	0.0131402	9568.29	0.593748	0.203953	2.9112	0.00360041	0.0165373	Upregulated	HW_vs_CW	obesity_upregulated
E2f1	Cdc7	TRUE	20	homer__CWGGCGGGAA_E2F1	4.48	r80__500bp_up_and_100bp_down_tss.mc9nr.feather	top50perTarget	1	0.0118215	249.923	0.98069	0.226589	4.32806	1.50429e-05	0.000165329	Upregulated	HW_vs_CW	obesity_upregulated
E2f1	Cdca3	TRUE	10	homer__CWGGCGGGAA_E2F1	4.48	r80__500bp_up_and_100bp_down_tss.mc9nr.feather	top50perTarget	0.7	0.00909632	270.967	1.35935	0.280871	4.83977	1.2999e-06	1.93982e-05	Upregulated	HW_vs_CW	obesity_upregulated
E2f1	Cdca5	TRUE	14	homer__CWGGCGGGAA_E2F1	4.48	r80__500bp_up_and_100bp_down_tss.mc9nr.feather	top50perTarget	1	0.0129687	54.1365	2.05043	0.45736	4.48318	7.35388e-06	8.92235e-05	Upregulated	HW_vs_CW	obesity_upregulated
E2f1	Cdt1	TRUE	25	homer__CWGGCGGGAA_E2F1	4.48	r80__500bp_up_and_100bp_down_tss.mc9nr.feather	top50perTarget	1	0.00947718	326.286	1.08588	0.283079	3.83595	0.000125079	0.00101379	Upregulated	HW_vs_CW	obesity_upregulated
E2f1	Cenpm	TRUE	16	homer__CWGGCGGGAA_E2F1	4.48	r80__500bp_up_and_100bp_down_tss.mc9nr.feather	top50perTarget	0.7	0.00832835	58.2154	1.43174	0.478488	2.99222	0.00276959	0.0133395	Upregulated	HW_vs_CW	obesity_upregulated
E2f1	Cep250	TRUE	12	homer__CWGGCGGGAA_E2F1	4.48	r80__500bp_up_and_100bp_down_tss.mc9nr.feather	top50perTarget	0.9	0.0119394	2439.13	0.584987	0.146024	4.00611	6.17269e-05	0.000551767	Upregulated	HW_vs_CW	obesity_upregulated
E2f1	Cep55	TRUE	7	homer__CWGGCGGGAA_E2F1	4.48	r80__500bp_up_and_100bp_down_tss.mc9nr.feather	top50perTarget	0.9	0.00987663	102.886	1.97213	0.392973	5.0185	5.20777e-07	8.71912e-06	Upregulated	HW_vs_CW	obesity_upregulated
E2f1	Cercam	TRUE	8	homer__CWGGCGGGAA_E2F1	4.48	r80__500bp_up_and_100bp_down_tss.mc9nr.feather	top50perTarget	1	0.00975854	1069.97	1.21909	0.238197	5.118	3.08787e-07	5.53796e-06	Upregulated	HW_vs_CW	obesity_upregulated
E2f1	Chaf1a	TRUE	27	homer__CWGGCGGGAA_E2F1	4.48	r80__500bp_up_and_100bp_down_tss.mc9nr.feather	top50perTarget	0.9	0.0108004	342.105	1.32498	0.27538	4.81147	1.49821e-06	2.1959e-05	Upregulated	HW_vs_CW	obesity_upregulated
E2f1	Chaf1b	TRUE	8	homer__CWGGCGGGAA_E2F1	4.48	r80__500bp_up_and_100bp_down_tss.mc9nr.feather	top50perTarget	1	0.0115149	111.947	1.28071	0.357804	3.57936	0.000344433	0.00236676	Upregulated	HW_vs_CW	obesity_upregulated
E2f1	Chek2	TRUE	16	homer__CWGGCGGGAA_E2F1	4.48	r80__500bp_up_and_100bp_down_tss.mc9nr.feather	top50perTarget	0.7	0.00953284	490.65	1.39687	0.200186	6.97788	2.99671e-12	1.62862e-10	Upregulated	HW_vs_CW	obesity_upregulated
E2f1	Ciita	TRUE	2	homer__CWGGCGGGAA_E2F1	4.48	r80__500bp_up_and_100bp_down_tss.mc9nr.feather	top50perTarget	0.8	0.0106356	1373.26	1.44763	0.330504	4.38006	1.18647e-05	0.000133982	Upregulated	HW_vs_CW	obesity_upregulated
E2f1	Cit	TRUE	7	homer__CWGGCGGGAA_E2F1	4.48	r80__500bp_up_and_100bp_down_tss.mc9nr.feather	top50perTarget	0.9	0.0120131	273.084	1.06088	0.232485	4.56321	5.03786e-06	6.40379e-05	Upregulated	HW_vs_CW	obesity_upregulated
E2f1	Clspn	TRUE	29	homer__CWGGCGGGAA_E2F1	4.48	r80__500bp_up_and_100bp_down_tss.mc9nr.feather	top50perTarget	1	0.0112734	104.085	1.54697	0.440423	3.51246	0.00044398	0.00291977	Upregulated	HW_vs_CW	obesity_upregulated
E2f1	Col3a1	TRUE	5	homer__CWGGCGGGAA_E2F1	4.48	r80__500bp_up_and_100bp_down_tss.mc9nr.feather	top50perTarget	0.6	0.00833288	88578.7	1.03974	0.30321	3.4291	0.000605579	0.00378664	Upregulated	HW_vs_CW	obesity_upregulated
E2f1	Col5a1	TRUE	12	homer__CWGGCGGGAA_E2F1	4.48	r80__500bp_up_and_100bp_down_tss.mc9nr.feather	top50perTarget	0.6	0.00767609	13984.2	1.09129	0.266994	4.08733	4.36365e-05	0.000410912	Upregulated	HW_vs_CW	obesity_upregulated
E2f1	Coro1a	TRUE	6	homer__CWGGCGGGAA_E2F1	4.48	r80__500bp_up_and_100bp_down_tss.mc9nr.feather	top50perTarget	0.9	0.0116946	2893.86	1.05094	0.306184	3.43237	0.00059834	0.00374732	Upregulated	HW_vs_CW	obesity_upregulated
E2f1	Coro1c	TRUE	5	homer__CWGGCGGGAA_E2F1	4.48	r80__500bp_up_and_100bp_down_tss.mc9nr.feather	top50perTarget	1	0.00773482	7268.57	0.726988	0.196696	3.696	0.00021902	0.00162865	Upregulated	HW_vs_CW	obesity_upregulated
E2f1	Ctnnbip1	TRUE	6	homer__CWGGCGGGAA_E2F1	4.48	r80__500bp_up_and_100bp_down_tss.mc9nr.feather	top50perTarget	0.9	0.0105549	1674.07	0.527182	0.153258	3.43984	0.000582068	0.00366051	Upregulated	HW_vs_CW	obesity_upregulated
E2f1	Ctsk	TRUE	5	homer__CWGGCGGGAA_E2F1	4.48	r80__500bp_up_and_100bp_down_tss.mc9nr.feather	top50perTarget	0.9	0.0150727	4691.76	1.42226	0.356713	3.98713	6.68782e-05	0.000592192	Upregulated	HW_vs_CW	obesity_upregulated
E2f1	Cxcl1	TRUE	10	homer__CWGGCGGGAA_E2F1	4.48	r80__500bp_up_and_100bp_down_tss.mc9nr.feather	top50perTarget	0.7	0.0151902	141.777	2.05632	0.469872	4.37635	1.20685e-05	0.00013574	Upregulated	HW_vs_CW	obesity_upregulated
E2f1	D5Ertd579e	TRUE	13	homer__CWGGCGGGAA_E2F1	4.48	r80__500bp_up_and_100bp_down_tss.mc9nr.feather	top50perTarget	0.1	0.00734725	9093.08	0.722666	0.111186	6.49964	8.05145e-11	3.40856e-09	Upregulated	HW_vs_CW	obesity_upregulated
E2f1	Dcbld2	TRUE	11	homer__CWGGCGGGAA_E2F1	4.48	r80__500bp_up_and_100bp_down_tss.mc9nr.feather	top50perTarget	0.7	0.00846659	3248.06	0.888452	0.183293	4.84717	1.25234e-06	1.88075e-05	Upregulated	HW_vs_CW	obesity_upregulated
E2f1	Dna2	TRUE	10	homer__CWGGCGGGAA_E2F1	4.48	r80__500bp_up_and_100bp_down_tss.mc9nr.feather	top50perTarget	0.5	0.00785679	336.665	1.30671	0.397929	3.28376	0.00102432	0.00587433	Upregulated	HW_vs_CW	obesity_upregulated
E2f1	Dpysl2	TRUE	13	homer__CWGGCGGGAA_E2F1	4.48	r80__500bp_up_and_100bp_down_tss.mc9nr.feather	top50perTarget	0.5	0.0115841	1738.4	0.701156	0.185074	3.78853	0.000151544	0.00119252	Upregulated	HW_vs_CW	obesity_upregulated
E2f1	Dscc1	TRUE	22	homer__CWGGCGGGAA_E2F1	4.48	r80__500bp_up_and_100bp_down_tss.mc9nr.feather	top50perTarget	0.8	0.0141163	35.7851	1.18914	0.466931	2.54672	0.010874	0.0401278	Upregulated	HW_vs_CW	obesity_upregulated
E2f1	Dtx3l	TRUE	9	homer__CWGGCGGGAA_E2F1	4.48	r80__500bp_up_and_100bp_down_tss.mc9nr.feather	top50perTarget	0.4	0.012003	3507.26	0.542	0.166427	3.25669	0.00112718	0.00637528	Upregulated	HW_vs_CW	obesity_upregulated
E2f1	Dusp7	TRUE	2	homer__CWGGCGGGAA_E2F1	4.48	r80__500bp_up_and_100bp_down_tss.mc9nr.feather	top50perTarget	0.7	0.00937292	1626.58	0.512445	0.150224	3.41121	0.000646758	0.00400397	Upregulated	HW_vs_CW	obesity_upregulated
E2f1	Efhd2	TRUE	13	homer__CWGGCGGGAA_E2F1	4.48	r80__500bp_up_and_100bp_down_tss.mc9nr.feather	top50perTarget	0.8	0.0184514	5207.66	0.836034	0.276849	3.01982	0.00252924	0.0123691	Upregulated	HW_vs_CW	obesity_upregulated
E2f1	Elmo2	TRUE	11	homer__CWGGCGGGAA_E2F1	4.48	r80__500bp_up_and_100bp_down_tss.mc9nr.feather	top50perTarget	1	0.00953065	4319.68	0.718671	0.181206	3.96603	7.30785e-05	0.000640183	Upregulated	HW_vs_CW	obesity_upregulated
E2f1	Eme1	TRUE	8	homer__CWGGCGGGAA_E2F1	4.48	r80__500bp_up_and_100bp_down_tss.mc9nr.feather	top50perTarget	0.3	0.0100684	32.9025	1.5037	0.411422	3.65489	0.000257289	0.00185791	Upregulated	HW_vs_CW	obesity_upregulated
E2f1	Emilin1	TRUE	10	homer__CWGGCGGGAA_E2F1	4.48	r80__500bp_up_and_100bp_down_tss.mc9nr.feather	top50perTarget	0.9	0.00992079	1993.95	0.540999	0.164358	3.2916	0.000996204	0.00574759	Upregulated	HW_vs_CW	obesity_upregulated
E2f1	Epb41l2	TRUE	12	homer__CWGGCGGGAA_E2F1	4.48	r80__500bp_up_and_100bp_down_tss.mc9nr.feather	top50perTarget	0.2	0.00972947	31156.5	1.38411	0.195319	7.0864	1.37649e-12	7.96343e-11	Upregulated	HW_vs_CW	obesity_upregulated
E2f1	Eri1	TRUE	2	homer__CWGGCGGGAA_E2F1	4.48	r80__500bp_up_and_100bp_down_tss.mc9nr.feather	top50perTarget	0.9	0.0152385	1456.09	0.549144	0.157794	3.48013	0.000501171	0.0032212	Upregulated	HW_vs_CW	obesity_upregulated
E2f1	Esco2	TRUE	14	homer__CWGGCGGGAA_E2F1	4.48	r80__500bp_up_and_100bp_down_tss.mc9nr.feather	top50perTarget	0.9	0.0144468	50.7175	1.54837	0.43882	3.52849	0.000417937	0.00277705	Upregulated	HW_vs_CW	obesity_upregulated
E2f1	Evi2a	TRUE	7	homer__CWGGCGGGAA_E2F1	4.48	r80__500bp_up_and_100bp_down_tss.mc9nr.feather	top50perTarget	0.9	0.0111226	893.17	1.49302	0.408646	3.65359	0.000258598	0.00186541	Upregulated	HW_vs_CW	obesity_upregulated
E2f1	Fam122b	TRUE	18	homer__CWGGCGGGAA_E2F1	4.48	r80__500bp_up_and_100bp_down_tss.mc9nr.feather	top50perTarget	0.9	0.0108278	559.762	0.869114	0.165314	5.25735	1.46147e-07	2.88608e-06	Upregulated	HW_vs_CW	obesity_upregulated
E2f1	Fancg	TRUE	12	homer__CWGGCGGGAA_E2F1	4.48	r80__500bp_up_and_100bp_down_tss.mc9nr.feather	top50perTarget	0.7	0.00803135	623.012	0.561455	0.191517	2.93161	0.00337205	0.015697	Upregulated	HW_vs_CW	obesity_upregulated
E2f1	Fcer1g	TRUE	4	homer__CWGGCGGGAA_E2F1	4.48	r80__500bp_up_and_100bp_down_tss.mc9nr.feather	top50perTarget	0.9	0.0140979	2774.47	0.890728	0.330892	2.6919	0.00710461	0.0285109	Upregulated	HW_vs_CW	obesity_upregulated
E2f1	Fgf13	TRUE	20	homer__CWGGCGGGAA_E2F1	4.48	r80__500bp_up_and_100bp_down_tss.mc9nr.feather	top50perTarget	0.6	0.00864224	2441.41	3.64055	0.342941	10.6157	2.51953e-26	1.18346e-23	Upregulated	HW_vs_CW	obesity_upregulated
E2f1	Fhod1	TRUE	16	homer__CWGGCGGGAA_E2F1	4.48	r80__500bp_up_and_100bp_down_tss.mc9nr.feather	top50perTarget	0.3	0.00704408	2822.51	0.503221	0.195524	2.5737	0.0100617	0.0378091	Upregulated	HW_vs_CW	obesity_upregulated
E2f1	Fignl1	TRUE	1	homer__CWGGCGGGAA_E2F1	4.48	r80__500bp_up_and_100bp_down_tss.mc9nr.feather	top50perTarget	0.9	0.0125069	101.408	2.119	0.381372	5.55627	2.75596e-08	6.54266e-07	Upregulated	HW_vs_CW	obesity_upregulated
E2f1	Flot1	TRUE	13	homer__CWGGCGGGAA_E2F1	4.48	r80__500bp_up_and_100bp_down_tss.mc9nr.feather	top50perTarget	0.9	0.0111281	5285.36	1.07016	0.17224	6.2132	5.19149e-10	1.82559e-08	Upregulated	HW_vs_CW	obesity_upregulated
E2f1	Frmd8	TRUE	5	homer__CWGGCGGGAA_E2F1	4.48	r80__500bp_up_and_100bp_down_tss.mc9nr.feather	top50perTarget	0.9	0.00938484	2103.82	0.65388	0.128479	5.08939	3.59212e-07	6.29354e-06	Upregulated	HW_vs_CW	obesity_upregulated
E2f1	Gabbr2	TRUE	7	homer__CWGGCGGGAA_E2F1	4.48	r80__500bp_up_and_100bp_down_tss.mc9nr.feather	top50perTarget	1	0.00991168	89.2773	2.40864	0.450111	5.35123	8.73602e-08	1.84325e-06	Upregulated	HW_vs_CW	obesity_upregulated
E2f1	Galnt7	TRUE	9	homer__CWGGCGGGAA_E2F1	4.48	r80__500bp_up_and_100bp_down_tss.mc9nr.feather	top50perTarget	0.9	0.00911874	944.293	0.734173	0.171638	4.27744	1.89053e-05	0.000200842	Upregulated	HW_vs_CW	obesity_upregulated
E2f1	Gins1	TRUE	30	homer__CWGGCGGGAA_E2F1	4.48	r80__500bp_up_and_100bp_down_tss.mc9nr.feather	top50perTarget	0.666886	0.00969984	136.144	0.539727	0.215098	2.50922	0.0120999	0.0437193	Upregulated	HW_vs_CW	obesity_upregulated
E2f1	Gm13375	TRUE	18	homer__CWGGCGGGAA_E2F1	4.48	r80__500bp_up_and_100bp_down_tss.mc9nr.feather	top50perTarget	0.6	0.0126066	251.155	0.621199	0.235238	2.64073	0.00827278	0.0323179	Upregulated	HW_vs_CW	obesity_upregulated
E2f1	Gm7694	TRUE	2	homer__CWGGCGGGAA_E2F1	4.48	r80__500bp_up_and_100bp_down_tss.mc9nr.feather	top50perTarget	0.9	0.0102087	723.369	1.31367	0.260758	5.03789	4.70685e-07	8.01871e-06	Upregulated	HW_vs_CW	obesity_upregulated
E2f1	Gmfb	TRUE	11	homer__CWGGCGGGAA_E2F1	4.48	r80__500bp_up_and_100bp_down_tss.mc9nr.feather	top50perTarget	0.9	0.0101655	9458.19	0.502391	0.118722	4.23165	2.31984e-05	0.000239989	Upregulated	HW_vs_CW	obesity_upregulated
E2f1	Gpr155	TRUE	6	homer__CWGGCGGGAA_E2F1	4.48	r80__500bp_up_and_100bp_down_tss.mc9nr.feather	top50perTarget	0.9	0.00837705	1000.46	1.27087	0.153483	8.28017	1.23e-16	1.39456e-14	Upregulated	HW_vs_CW	obesity_upregulated
E2f1	H2-DMa	TRUE	2	homer__CWGGCGGGAA_E2F1	4.48	r80__500bp_up_and_100bp_down_tss.mc9nr.feather	top50perTarget	0.8	0.00802483	2246.91	0.957634	0.300004	3.19208	0.00141254	0.00766861	Upregulated	HW_vs_CW	obesity_upregulated
E2f1	Hapln3	TRUE	10	homer__CWGGCGGGAA_E2F1	4.48	r80__500bp_up_and_100bp_down_tss.mc9nr.feather	top50perTarget	0.5	0.0103436	156.146	1.40534	0.354199	3.96765	7.25838e-05	0.000636697	Upregulated	HW_vs_CW	obesity_upregulated
E2f1	Haus6	TRUE	13	homer__CWGGCGGGAA_E2F1	4.48	r80__500bp_up_and_100bp_down_tss.mc9nr.feather	top50perTarget	0.8	0.013112	673.89	0.54594	0.131767	4.14321	3.42475e-05	0.000335469	Upregulated	HW_vs_CW	obesity_upregulated
E2f1	Hells	TRUE	44	homer__CWGGCGGGAA_E2F1	4.48	r80__500bp_up_and_100bp_down_tss.mc9nr.feather	top50perTarget	1	0.0159208	173.075	1.36648	0.320173	4.26793	1.97294e-05	0.00020881	Upregulated	HW_vs_CW	obesity_upregulated
E2f1	Hic1	TRUE	14	homer__CWGGCGGGAA_E2F1	4.48	r80__500bp_up_and_100bp_down_tss.mc9nr.feather	top50perTarget	0.9	0.0127289	1927.24	0.636726	0.241293	2.63881	0.00831978	0.0324629	Upregulated	HW_vs_CW	obesity_upregulated
E2f1	Htra1	TRUE	1	homer__CWGGCGGGAA_E2F1	4.48	r80__500bp_up_and_100bp_down_tss.mc9nr.feather	top50perTarget	0.6	0.0102853	10554.7	0.623508	0.238171	2.61791	0.00884713	0.0340989	Upregulated	HW_vs_CW	obesity_upregulated
E2f1	Ifih1	TRUE	9	homer__CWGGCGGGAA_E2F1	4.48	r80__500bp_up_and_100bp_down_tss.mc9nr.feather	top50perTarget	0.4	0.0095381	2413.11	0.577699	0.159716	3.61705	0.000297983	0.00209875	Upregulated	HW_vs_CW	obesity_upregulated
E2f1	Igsf8	TRUE	10	homer__CWGGCGGGAA_E2F1	4.48	r80__500bp_up_and_100bp_down_tss.mc9nr.feather	top50perTarget	1	0.0129067	2038.4	0.712823	0.190064	3.75044	0.000176522	0.00135714	Upregulated	HW_vs_CW	obesity_upregulated
E2f1	Igsf9	TRUE	9	homer__CWGGCGGGAA_E2F1	4.48	r80__500bp_up_and_100bp_down_tss.mc9nr.feather	top50perTarget	0.7	0.00905666	243.128	0.607146	0.21985	2.76164	0.00575118	0.0241044	Upregulated	HW_vs_CW	obesity_upregulated
E2f1	Iqcg	TRUE	10	homer__CWGGCGGGAA_E2F1	4.48	r80__500bp_up_and_100bp_down_tss.mc9nr.feather	top50perTarget	0.8	0.00826319	69.5379	1.23081	0.49846	2.46922	0.0135409	0.0478392	Upregulated	HW_vs_CW	obesity_upregulated
E2f1	Iscu	TRUE	11	homer__CWGGCGGGAA_E2F1	4.48	r80__500bp_up_and_100bp_down_tss.mc9nr.feather	top50perTarget	1	0.0103754	8604.48	0.634199	0.166969	3.79831	0.000145687	0.00115148	Upregulated	HW_vs_CW	obesity_upregulated
E2f1	Kcnab2	TRUE	3	homer__CWGGCGGGAA_E2F1	4.48	r80__500bp_up_and_100bp_down_tss.mc9nr.feather	top50perTarget	0.8	0.0149672	1110.44	1.62008	0.356967	4.53845	5.6668e-06	7.10258e-05	Upregulated	HW_vs_CW	obesity_upregulated
E2f1	Kif18a	TRUE	19	homer__CWGGCGGGAA_E2F1	4.48	r80__500bp_up_and_100bp_down_tss.mc9nr.feather	top50perTarget	0.9	0.0124284	88.7621	1.43609	0.390952	3.67333	0.000239414	0.00175778	Upregulated	HW_vs_CW	obesity_upregulated
E2f1	Kif20b	TRUE	7	homer__CWGGCGGGAA_E2F1	4.48	r80__500bp_up_and_100bp_down_tss.mc9nr.feather	top50perTarget	1	0.0106994	193.351	1.84687	0.299614	6.16415	7.08605e-10	2.40609e-08	Upregulated	HW_vs_CW	obesity_upregulated
E2f1	Kif23	TRUE	3	homer__CWGGCGGGAA_E2F1	4.48	r80__500bp_up_and_100bp_down_tss.mc9nr.feather	top50perTarget	0.1	0.0116328	355.851	0.659676	0.208084	3.17025	0.00152309	0.00817177	Upregulated	HW_vs_CW	obesity_upregulated
E2f1	Kifc1	TRUE	2	homer__CWGGCGGGAA_E2F1	4.48	r80__500bp_up_and_100bp_down_tss.mc9nr.feather	top50perTarget	0.7	0.0121896	156.917	1.5637	0.293906	5.32041	1.03535e-07	2.12764e-06	Upregulated	HW_vs_CW	obesity_upregulated
E2f1	Klhl4	TRUE	6	homer__CWGGCGGGAA_E2F1	4.48	r80__500bp_up_and_100bp_down_tss.mc9nr.feather	top50perTarget	0.9	0.015371	575.029	0.672984	0.138013	4.87622	1.08139e-06	1.64739e-05	Upregulated	HW_vs_CW	obesity_upregulated
E2f1	Klhl5	TRUE	10	homer__CWGGCGGGAA_E2F1	4.48	r80__500bp_up_and_100bp_down_tss.mc9nr.feather	top50perTarget	1	0.00862052	7226.43	0.903586	0.189442	4.76972	1.84484e-06	2.64691e-05	Upregulated	HW_vs_CW	obesity_upregulated
E2f1	Lacc1	TRUE	1	homer__CWGGCGGGAA_E2F1	4.48	r80__500bp_up_and_100bp_down_tss.mc9nr.feather	top50perTarget	0.9	0.0111226	1139.53	0.875206	0.23002	3.80492	0.00014185	0.00112341	Upregulated	HW_vs_CW	obesity_upregulated
E2f1	Lasp1	TRUE	7	homer__CWGGCGGGAA_E2F1	4.48	r80__500bp_up_and_100bp_down_tss.mc9nr.feather	top50perTarget	0.7	0.0138008	18309	0.610133	0.17979	3.39359	0.000689821	0.00421978	Upregulated	HW_vs_CW	obesity_upregulated
E2f1	Lat2	TRUE	1	homer__CWGGCGGGAA_E2F1	4.48	r80__500bp_up_and_100bp_down_tss.mc9nr.feather	top50perTarget	0.9	0.0110021	607.47	2.8319	0.351848	8.04865	8.37118e-16	8.60139e-14	Upregulated	HW_vs_CW	obesity_upregulated
E2f1	Lbh	TRUE	9	homer__CWGGCGGGAA_E2F1	4.48	r80__500bp_up_and_100bp_down_tss.mc9nr.feather	top50perTarget	0.9	0.0143876	3769.79	0.625355	0.242759	2.57603	0.0099941	0.0375927	Upregulated	HW_vs_CW	obesity_upregulated
E2f1	Lig4	TRUE	2	homer__CWGGCGGGAA_E2F1	4.48	r80__500bp_up_and_100bp_down_tss.mc9nr.feather	top50perTarget	0.8	0.00938424	622.703	0.766131	0.182059	4.20815	2.57471e-05	0.000262773	Upregulated	HW_vs_CW	obesity_upregulated
E2f1	Limch1	TRUE	16	homer__CWGGCGGGAA_E2F1	4.48	r80__500bp_up_and_100bp_down_tss.mc9nr.feather	top50perTarget	0.8	0.00714563	4997.38	0.703471	0.210379	3.34383	0.000826317	0.00491604	Upregulated	HW_vs_CW	obesity_upregulated
E2f1	Limd2	TRUE	2	homer__CWGGCGGGAA_E2F1	4.48	r80__500bp_up_and_100bp_down_tss.mc9nr.feather	top50perTarget	0.9	0.00847374	929.268	0.701964	0.247808	2.83269	0.00461582	0.0201954	Upregulated	HW_vs_CW	obesity_upregulated
E2f1	Lmnb1	TRUE	18	homer__CWGGCGGGAA_E2F1	4.48	r80__500bp_up_and_100bp_down_tss.mc9nr.feather	top50perTarget	0.9	0.0120526	673.02	0.978508	0.156244	6.26269	3.78386e-10	1.38494e-08	Upregulated	HW_vs_CW	obesity_upregulated
E2f1	Lpar5	TRUE	1	homer__CWGGCGGGAA_E2F1	4.48	r80__500bp_up_and_100bp_down_tss.mc9nr.feather	top50perTarget	0.8	0.0116734	133.457	1.45324	0.361648	4.01838	5.86007e-05	0.000527406	Upregulated	HW_vs_CW	obesity_upregulated
E2f1	Lpgat1	TRUE	10	homer__CWGGCGGGAA_E2F1	4.48	r80__500bp_up_and_100bp_down_tss.mc9nr.feather	top50perTarget	0.7	0.0100875	28378.8	2.21801	0.260298	8.52102	1.58156e-17	2.12252e-15	Upregulated	HW_vs_CW	obesity_upregulated
E2f1	Lrr1	TRUE	15	homer__CWGGCGGGAA_E2F1	4.48	r80__500bp_up_and_100bp_down_tss.mc9nr.feather	top50perTarget	0.359092	0.00632809	10.554	3.49266	1.01658	3.4357	0.000591036	0.00370864	Upregulated	HW_vs_CW	obesity_upregulated
E2f1	Lsm3	TRUE	22	homer__CWGGCGGGAA_E2F1	4.48	r80__500bp_up_and_100bp_down_tss.mc9nr.feather	top50perTarget	0.7	0.013769	1211.03	0.657426	0.165913	3.96247	7.41784e-05	0.000648954	Upregulated	HW_vs_CW	obesity_upregulated
E2f1	Ly75	TRUE	1	homer__CWGGCGGGAA_E2F1	4.48	r80__500bp_up_and_100bp_down_tss.mc9nr.feather	top50perTarget	0.9	0.00974316	171.581	1.01535	0.251572	4.03603	5.43628e-05	0.000494909	Upregulated	HW_vs_CW	obesity_upregulated
E2f1	Lysmd2	TRUE	2	homer__CWGGCGGGAA_E2F1	4.48	r80__500bp_up_and_100bp_down_tss.mc9nr.feather	top50perTarget	0.6	0.00917862	553.591	0.599471	0.181324	3.30608	0.000946094	0.00551064	Upregulated	HW_vs_CW	obesity_upregulated
E2f1	Magi1	TRUE	23	homer__CWGGCGGGAA_E2F1	4.48	r80__500bp_up_and_100bp_down_tss.mc9nr.feather	top50perTarget	1	0.00929167	2889.76	0.707543	0.191197	3.7006	0.000215088	0.00160851	Upregulated	HW_vs_CW	obesity_upregulated
E2f1	Marcks	TRUE	14	homer__CWGGCGGGAA_E2F1	4.48	r80__500bp_up_and_100bp_down_tss.mc9nr.feather	top50perTarget	1	0.0069665	7219.73	0.891335	0.291929	3.05326	0.00226368	0.0112887	Upregulated	HW_vs_CW	obesity_upregulated
E2f1	Mcm5	TRUE	34	homer__CWGGCGGGAA_E2F1	4.48	r80__500bp_up_and_100bp_down_tss.mc9nr.feather	top50perTarget	1	0.0086073	613.744	1.34046	0.258414	5.18725	2.13426e-07	4.00616e-06	Upregulated	HW_vs_CW	obesity_upregulated
E2f1	Mcm6	TRUE	49	homer__CWGGCGGGAA_E2F1	4.48	r80__500bp_up_and_100bp_down_tss.mc9nr.feather	top50perTarget	0.9	0.0158503	1384.83	0.712588	0.180792	3.94149	8.09773e-05	0.000698217	Upregulated	HW_vs_CW	obesity_upregulated
E2f1	Me2	TRUE	2	homer__CWGGCGGGAA_E2F1	4.48	r80__500bp_up_and_100bp_down_tss.mc9nr.feather	top50perTarget	0.9	0.0159979	1675.16	0.511832	0.175992	2.90827	0.0036343	0.0166467	Upregulated	HW_vs_CW	obesity_upregulated
E2f1	Med30	TRUE	4	homer__CWGGCGGGAA_E2F1	4.48	r80__500bp_up_and_100bp_down_tss.mc9nr.feather	top50perTarget	1	0.0170576	718.432	0.688552	0.215704	3.19211	0.00141237	0.00766861	Upregulated	HW_vs_CW	obesity_upregulated
E2f1	Megf9	TRUE	11	homer__CWGGCGGGAA_E2F1	4.48	r80__500bp_up_and_100bp_down_tss.mc9nr.feather	top50perTarget	0.6	0.00985788	3931.64	0.658729	0.137419	4.79356	1.63844e-06	2.36974e-05	Upregulated	HW_vs_CW	obesity_upregulated
E2f1	Meox2	TRUE	12	homer__CWGGCGGGAA_E2F1	4.48	r80__500bp_up_and_100bp_down_tss.mc9nr.feather	top50perTarget	0.1	0.0112464	3070.35	0.837891	0.231365	3.62152	0.000292881	0.0020678	Upregulated	HW_vs_CW	obesity_upregulated
E2f1	Mex3b	TRUE	10	homer__CWGGCGGGAA_E2F1	4.48	r80__500bp_up_and_100bp_down_tss.mc9nr.feather	top50perTarget	1	0.0101402	250.41	0.650302	0.245938	2.64417	0.00818903	0.0320288	Upregulated	HW_vs_CW	obesity_upregulated
E2f1	Mfap2	TRUE	2	homer__CWGGCGGGAA_E2F1	4.48	r80__500bp_up_and_100bp_down_tss.mc9nr.feather	top50perTarget	1	0.0154121	562.543	0.710995	0.198707	3.57812	0.000346079	0.00237476	Upregulated	HW_vs_CW	obesity_upregulated
E2f1	Mmd	TRUE	7	homer__CWGGCGGGAA_E2F1	4.48	r80__500bp_up_and_100bp_down_tss.mc9nr.feather	top50perTarget	0.7	0.00936958	41366.8	0.906448	0.240512	3.76883	0.000164013	0.00127588	Upregulated	HW_vs_CW	obesity_upregulated
E2f1	Mms22l	TRUE	11	homer__CWGGCGGGAA_E2F1	4.48	r80__500bp_up_and_100bp_down_tss.mc9nr.feather	top50perTarget	1	0.01141	219.102	1.66697	0.268566	6.20694	5.40252e-10	1.88973e-08	Upregulated	HW_vs_CW	obesity_upregulated
E2f1	Mrc2	TRUE	14	homer__CWGGCGGGAA_E2F1	4.48	r80__500bp_up_and_100bp_down_tss.mc9nr.feather	top50perTarget	1	0.0158537	5934.39	2.23509	0.362688	6.16258	7.15685e-10	2.42375e-08	Upregulated	HW_vs_CW	obesity_upregulated
E2f1	Mthfd1l	TRUE	1	homer__CWGGCGGGAA_E2F1	4.48	r80__500bp_up_and_100bp_down_tss.mc9nr.feather	top50perTarget	0.8	0.0101614	344.685	1.41312	0.203277	6.95172	3.60859e-12	1.94509e-10	Upregulated	HW_vs_CW	obesity_upregulated
E2f1	Mutyh	TRUE	10	homer__CWGGCGGGAA_E2F1	4.48	r80__500bp_up_and_100bp_down_tss.mc9nr.feather	top50perTarget	1	0.010993	180.168	1.18491	0.356476	3.32396	0.000887477	0.00522319	Upregulated	HW_vs_CW	obesity_upregulated
E2f1	Mvk	TRUE	13	homer__CWGGCGGGAA_E2F1	4.48	r80__500bp_up_and_100bp_down_tss.mc9nr.feather	top50perTarget	0.5	0.0119538	1130.23	0.93305	0.156275	5.97057	2.36427e-09	7.14276e-08	Upregulated	HW_vs_CW	obesity_upregulated
E2f1	Mycbp2	TRUE	1	homer__CWGGCGGGAA_E2F1	4.48	r80__500bp_up_and_100bp_down_tss.mc9nr.feather	top50perTarget	1	0.0105528	21354.1	1.11479	0.196556	5.6716	1.41466e-08	3.56429e-07	Upregulated	HW_vs_CW	obesity_upregulated
E2f1	Nab2	TRUE	4	homer__CWGGCGGGAA_E2F1	4.48	r80__500bp_up_and_100bp_down_tss.mc9nr.feather	top50perTarget	0.9	0.0137571	964.992	1.011	0.112177	9.0125	2.01407e-19	3.82054e-17	Upregulated	HW_vs_CW	obesity_upregulated
E2f1	Ncapg	TRUE	18	homer__CWGGCGGGAA_E2F1	4.48	r80__500bp_up_and_100bp_down_tss.mc9nr.feather	top50perTarget	0.9	0.00891436	87.3334	1.71843	0.36377	4.72395	2.31303e-06	3.22257e-05	Upregulated	HW_vs_CW	obesity_upregulated
E2f1	Nedd9	TRUE	15	homer__CWGGCGGGAA_E2F1	4.48	r80__500bp_up_and_100bp_down_tss.mc9nr.feather	top50perTarget	1	0.0116309	6722.02	1.15255	0.329213	3.50094	0.000463626	0.00303162	Upregulated	HW_vs_CW	obesity_upregulated
E2f1	Nfam1	TRUE	5	homer__CWGGCGGGAA_E2F1	4.48	r80__500bp_up_and_100bp_down_tss.mc9nr.feather	top50perTarget	0.8	0.0156512	2424.98	1.46577	0.384377	3.81338	0.00013708	0.0010905	Upregulated	HW_vs_CW	obesity_upregulated
E2f1	Nos2	TRUE	6	homer__CWGGCGGGAA_E2F1	4.48	r80__500bp_up_and_100bp_down_tss.mc9nr.feather	top50perTarget	0.9	0.0113125	664.404	0.894021	0.345106	2.59057	0.00958179	0.0363518	Upregulated	HW_vs_CW	obesity_upregulated
E2f1	Npas4	TRUE	16	homer__CWGGCGGGAA_E2F1	4.48	r80__500bp_up_and_100bp_down_tss.mc9nr.feather	top50perTarget	0.9	0.0155002	70.4331	2.11606	0.773804	2.73463	0.0062451	0.0257747	Upregulated	HW_vs_CW	obesity_upregulated
E2f1	Npr3	TRUE	22	homer__CWGGCGGGAA_E2F1	4.48	r80__500bp_up_and_100bp_down_tss.mc9nr.feather	top50perTarget	0.6	0.00976116	47961.2	2.69631	0.366478	7.35736	1.87581e-13	1.27169e-11	Upregulated	HW_vs_CW	obesity_upregulated
E2f1	Nptx1	TRUE	10	homer__CWGGCGGGAA_E2F1	4.48	r80__500bp_up_and_100bp_down_tss.mc9nr.feather	top50perTarget	0.9	0.00881557	73.63	3.72643	1.31003	2.84455	0.00444748	0.0196374	Upregulated	HW_vs_CW	obesity_upregulated
E2f1	Nsl1	TRUE	7	homer__CWGGCGGGAA_E2F1	4.48	r80__500bp_up_and_100bp_down_tss.mc9nr.feather	top50perTarget	0.6	0.0124751	104.826	1.4976	0.390707	3.83306	0.000126558	0.0010222	Upregulated	HW_vs_CW	obesity_upregulated
E2f1	Nubp1	TRUE	15	homer__CWGGCGGGAA_E2F1	4.48	r80__500bp_up_and_100bp_down_tss.mc9nr.feather	top50perTarget	1	0.0119951	505.59	0.596698	0.205099	2.90932	0.00362212	0.0166133	Upregulated	HW_vs_CW	obesity_upregulated
E2f1	Nuf2	TRUE	5	homer__CWGGCGGGAA_E2F1	4.48	r80__500bp_up_and_100bp_down_tss.mc9nr.feather	top50perTarget	0.9	0.00853084	94.007	2.39913	0.481409	4.98355	6.24277e-07	1.02205e-05	Upregulated	HW_vs_CW	obesity_upregulated
E2f1	Nup210	TRUE	7	homer__CWGGCGGGAA_E2F1	4.48	r80__500bp_up_and_100bp_down_tss.mc9nr.feather	top50perTarget	0.9	0.0118724	1973.38	1.80297	0.403548	4.4678	7.90299e-06	9.49514e-05	Upregulated	HW_vs_CW	obesity_upregulated
E2f1	Nxph3	TRUE	9	homer__CWGGCGGGAA_E2F1	4.48	r80__500bp_up_and_100bp_down_tss.mc9nr.feather	top50perTarget	0.7	0.00828662	78.2253	0.577948	0.232857	2.48199	0.0130651	0.0465249	Upregulated	HW_vs_CW	obesity_upregulated
E2f1	Osbpl8	TRUE	4	homer__CWGGCGGGAA_E2F1	4.48	r80__500bp_up_and_100bp_down_tss.mc9nr.feather	top50perTarget	1	0.00867576	4671.88	0.980049	0.162845	6.01829	1.76269e-09	5.48491e-08	Upregulated	HW_vs_CW	obesity_upregulated
E2f1	Oxct1	TRUE	6	homer__CWGGCGGGAA_E2F1	4.48	r80__500bp_up_and_100bp_down_tss.mc9nr.feather	top50perTarget	0.3	0.0156236	20017.5	0.525195	0.139086	3.77604	0.000159339	0.00124591	Upregulated	HW_vs_CW	obesity_upregulated
E2f1	Oxtr	TRUE	4	homer__CWGGCGGGAA_E2F1	4.48	r80__500bp_up_and_100bp_down_tss.mc9nr.feather	top50perTarget	1	0.010626	4139.78	4.49966	0.610662	7.36851	1.72551e-13	1.19441e-11	Upregulated	HW_vs_CW	obesity_upregulated
E2f1	P2ry1	TRUE	8	homer__CWGGCGGGAA_E2F1	4.48	r80__500bp_up_and_100bp_down_tss.mc9nr.feather	top50perTarget	0.9	0.00782425	349.263	1.51802	0.289092	5.25101	1.51268e-07	2.97528e-06	Upregulated	HW_vs_CW	obesity_upregulated
E2f1	Pak1	TRUE	13	homer__CWGGCGGGAA_E2F1	4.48	r80__500bp_up_and_100bp_down_tss.mc9nr.feather	top50perTarget	0.8	0.0122062	692.985	0.869548	0.353132	2.46239	0.0138015	0.0485427	Upregulated	HW_vs_CW	obesity_upregulated
E2f1	Parpbp	TRUE	6	homer__CWGGCGGGAA_E2F1	4.48	r80__500bp_up_and_100bp_down_tss.mc9nr.feather	top50perTarget	0.7	0.0150375	54.5329	2.03477	0.556568	3.65592	0.000256257	0.00185317	Upregulated	HW_vs_CW	obesity_upregulated
E2f1	Pclaf	TRUE	33	homer__CWGGCGGGAA_E2F1	4.48	r80__500bp_up_and_100bp_down_tss.mc9nr.feather	top50perTarget	0.6	0.0127013	162.962	2.55676	0.300806	8.49969	1.90102e-17	2.53401e-15	Upregulated	HW_vs_CW	obesity_upregulated
E2f1	Pde7a	TRUE	7	homer__CWGGCGGGAA_E2F1	4.48	r80__500bp_up_and_100bp_down_tss.mc9nr.feather	top50perTarget	0.6	0.00943844	3839.71	1.20157	0.246915	4.86635	1.13679e-06	1.7238e-05	Upregulated	HW_vs_CW	obesity_upregulated
E2f1	Pik3ap1	TRUE	8	homer__CWGGCGGGAA_E2F1	4.48	r80__500bp_up_and_100bp_down_tss.mc9nr.feather	top50perTarget	1	0.0160877	2154.71	1.73535	0.385031	4.50704	6.57395e-06	8.09051e-05	Upregulated	HW_vs_CW	obesity_upregulated
E2f1	Plk2	TRUE	8	homer__CWGGCGGGAA_E2F1	4.48	r80__500bp_up_and_100bp_down_tss.mc9nr.feather	top50perTarget	0.8	0.010823	2552.41	1.12367	0.288825	3.89049	0.000100042	0.000838061	Upregulated	HW_vs_CW	obesity_upregulated
E2f1	Plp2	TRUE	8	homer__CWGGCGGGAA_E2F1	4.48	r80__500bp_up_and_100bp_down_tss.mc9nr.feather	top50perTarget	0.9	0.00951594	3189.05	0.650138	0.205286	3.16699	0.00154028	0.00823934	Upregulated	HW_vs_CW	obesity_upregulated
E2f1	Pola1	TRUE	32	homer__CWGGCGGGAA_E2F1	4.48	r80__500bp_up_and_100bp_down_tss.mc9nr.feather	top50perTarget	0.9	0.00945583	585.734	0.722206	0.139283	5.18516	2.15824e-07	4.02817e-06	Upregulated	HW_vs_CW	obesity_upregulated
E2f1	Polq	TRUE	13	homer__CWGGCGGGAA_E2F1	4.48	r80__500bp_up_and_100bp_down_tss.mc9nr.feather	top50perTarget	1	0.0153407	77.6956	1.40082	0.342247	4.093	4.2582e-05	0.00040259	Upregulated	HW_vs_CW	obesity_upregulated
E2f1	Pou3f1	TRUE	9	homer__CWGGCGGGAA_E2F1	4.48	r80__500bp_up_and_100bp_down_tss.mc9nr.feather	top50perTarget	0.1	0.0216533	31.7088	1.81522	0.410452	4.42249	9.757e-06	0.000113628	Upregulated	HW_vs_CW	obesity_upregulated
E2f1	Ppic	TRUE	3	homer__CWGGCGGGAA_E2F1	4.48	r80__500bp_up_and_100bp_down_tss.mc9nr.feather	top50perTarget	0.7	0.00896335	5714.33	0.916754	0.285546	3.21053	0.00132491	0.00728074	Upregulated	HW_vs_CW	obesity_upregulated
E2f1	Ppp1r18	TRUE	21	homer__CWGGCGGGAA_E2F1	4.48	r80__500bp_up_and_100bp_down_tss.mc9nr.feather	top50perTarget	0.9	0.0177751	4877.25	0.537874	0.160558	3.35003	0.000808034	0.00482765	Upregulated	HW_vs_CW	obesity_upregulated
E2f1	Prim2	TRUE	15	homer__CWGGCGGGAA_E2F1	4.48	r80__500bp_up_and_100bp_down_tss.mc9nr.feather	top50perTarget	0.9	0.0106407	395.776	0.51183	0.173218	2.95483	0.00312842	0.0147826	Upregulated	HW_vs_CW	obesity_upregulated
E2f1	Prps1	TRUE	21	homer__CWGGCGGGAA_E2F1	4.48	r80__500bp_up_and_100bp_down_tss.mc9nr.feather	top50perTarget	0.5	0.00960266	8348.48	0.870546	0.209751	4.15038	3.31917e-05	0.000327239	Upregulated	HW_vs_CW	obesity_upregulated
E2f1	Prr11	TRUE	12	homer__CWGGCGGGAA_E2F1	4.48	r80__500bp_up_and_100bp_down_tss.mc9nr.feather	top50perTarget	0.9	0.00836597	130.252	1.25316	0.273937	4.57464	4.77045e-06	6.09747e-05	Upregulated	HW_vs_CW	obesity_upregulated
E2f1	Psat1	TRUE	29	homer__CWGGCGGGAA_E2F1	4.48	r80__500bp_up_and_100bp_down_tss.mc9nr.feather	top50perTarget	0.9	0.0199027	9530.68	0.981226	0.230271	4.26117	2.03361e-05	0.000214312	Upregulated	HW_vs_CW	obesity_upregulated
E2f1	Ptgfrn	TRUE	6	homer__CWGGCGGGAA_E2F1	4.48	r80__500bp_up_and_100bp_down_tss.mc9nr.feather	top50perTarget	1	0.0134909	5319.53	0.577139	0.161035	3.58393	0.000338468	0.00233228	Upregulated	HW_vs_CW	obesity_upregulated
E2f1	Rab30	TRUE	9	homer__CWGGCGGGAA_E2F1	4.48	r80__500bp_up_and_100bp_down_tss.mc9nr.feather	top50perTarget	0.4	0.00902188	676.16	0.580972	0.17927	3.24077	0.00119208	0.00666967	Upregulated	HW_vs_CW	obesity_upregulated
E2f1	Rab8b	TRUE	9	homer__CWGGCGGGAA_E2F1	4.48	r80__500bp_up_and_100bp_down_tss.mc9nr.feather	top50perTarget	1	0.00995052	5584.69	0.713122	0.201469	3.53962	0.000400707	0.00267518	Upregulated	HW_vs_CW	obesity_upregulated
E2f1	Rad50	TRUE	7	homer__CWGGCGGGAA_E2F1	4.48	r80__500bp_up_and_100bp_down_tss.mc9nr.feather	top50perTarget	0.8	0.0110723	3111.03	1.48137	0.216462	6.84355	7.72528e-12	3.91785e-10	Upregulated	HW_vs_CW	obesity_upregulated
E2f1	Rad51	TRUE	24	homer__CWGGCGGGAA_E2F1	4.48	r80__500bp_up_and_100bp_down_tss.mc9nr.feather	top50perTarget	0.8	0.0124746	92.4332	1.30867	0.366173	3.57392	0.000351674	0.00240562	Upregulated	HW_vs_CW	obesity_upregulated
E2f1	Rad51ap1	TRUE	15	homer__CWGGCGGGAA_E2F1	4.48	r80__500bp_up_and_100bp_down_tss.mc9nr.feather	top50perTarget	0.7	0.008915	90.8718	1.86993	0.326892	5.72032	1.06322e-08	2.7599e-07	Upregulated	HW_vs_CW	obesity_upregulated
E2f1	Rad54l	TRUE	10	homer__CWGGCGGGAA_E2F1	4.48	r80__500bp_up_and_100bp_down_tss.mc9nr.feather	top50perTarget	0.820783	0.0102269	97.6088	0.891004	0.320252	2.78219	0.00539927	0.0229118	Upregulated	HW_vs_CW	obesity_upregulated
E2f1	Rbl1	TRUE	47	homer__CWGGCGGGAA_E2F1	4.48	r80__500bp_up_and_100bp_down_tss.mc9nr.feather	top50perTarget	0.9	0.0123592	1097.03	0.930003	0.212257	4.38149	1.17868e-05	0.000133408	Upregulated	HW_vs_CW	obesity_upregulated
E2f1	Rcan3	TRUE	7	homer__CWGGCGGGAA_E2F1	4.48	r80__500bp_up_and_100bp_down_tss.mc9nr.feather	top50perTarget	0.8	0.0109244	1496.38	0.699611	0.192853	3.6277	0.000285955	0.00202706	Upregulated	HW_vs_CW	obesity_upregulated
E2f1	Recql	TRUE	10	homer__CWGGCGGGAA_E2F1	4.48	r80__500bp_up_and_100bp_down_tss.mc9nr.feather	top50perTarget	0.8	0.0105237	1050.49	0.504231	0.129123	3.90505	9.42071e-05	0.000796837	Upregulated	HW_vs_CW	obesity_upregulated
E2f1	Reep5	TRUE	3	homer__CWGGCGGGAA_E2F1	4.48	r80__500bp_up_and_100bp_down_tss.mc9nr.feather	top50perTarget	1	0.00951454	28288.3	0.8178	0.143878	5.68399	1.31589e-08	3.34533e-07	Upregulated	HW_vs_CW	obesity_upregulated
E2f1	Ret	TRUE	12	homer__CWGGCGGGAA_E2F1	4.48	r80__500bp_up_and_100bp_down_tss.mc9nr.feather	top50perTarget	0.7	0.010601	1782.98	1.0721	0.298956	3.58614	0.000335613	0.00231584	Upregulated	HW_vs_CW	obesity_upregulated
E2f1	Rfc3	TRUE	22	homer__CWGGCGGGAA_E2F1	4.48	r80__500bp_up_and_100bp_down_tss.mc9nr.feather	top50perTarget	0.9	0.00893502	349.374	0.651626	0.18686	3.48724	0.000488038	0.00315679	Upregulated	HW_vs_CW	obesity_upregulated
E2f1	Rhoh	TRUE	4	homer__CWGGCGGGAA_E2F1	4.48	r80__500bp_up_and_100bp_down_tss.mc9nr.feather	top50perTarget	0.9	0.00919938	183.911	1.1791	0.435912	2.7049	0.0068325	0.0276836	Upregulated	HW_vs_CW	obesity_upregulated
E2f1	Rnf145	TRUE	22	homer__CWGGCGGGAA_E2F1	4.48	r80__500bp_up_and_100bp_down_tss.mc9nr.feather	top50perTarget	0.9	0.0139253	5144.88	0.584147	0.167118	3.49542	0.000473321	0.0030853	Upregulated	HW_vs_CW	obesity_upregulated
E2f1	Rps6ka3	TRUE	22	homer__CWGGCGGGAA_E2F1	4.48	r80__500bp_up_and_100bp_down_tss.mc9nr.feather	top50perTarget	0.7	0.0114001	13111.4	0.889375	0.149152	5.96289	2.47811e-09	7.45246e-08	Upregulated	HW_vs_CW	obesity_upregulated
E2f1	Rrm1	TRUE	13	homer__CWGGCGGGAA_E2F1	4.48	r80__500bp_up_and_100bp_down_tss.mc9nr.feather	top50perTarget	0.9	0.00870115	1745.52	0.50975	0.0958144	5.32018	1.03662e-07	2.12804e-06	Upregulated	HW_vs_CW	obesity_upregulated
E2f1	Runx2	TRUE	12	homer__CWGGCGGGAA_E2F1	4.48	r80__500bp_up_and_100bp_down_tss.mc9nr.feather	top50perTarget	0.9	0.0110413	301.031	2.50645	0.456952	5.48515	4.13113e-08	9.41097e-07	Upregulated	HW_vs_CW	obesity_upregulated
E2f1	S1pr2	TRUE	8	homer__CWGGCGGGAA_E2F1	4.48	r80__500bp_up_and_100bp_down_tss.mc9nr.feather	top50perTarget	1	0.0101021	981.389	1.15686	0.292449	3.95578	7.62845e-05	0.000663846	Upregulated	HW_vs_CW	obesity_upregulated
E2f1	Sertad4	TRUE	14	homer__CWGGCGGGAA_E2F1	4.48	r80__500bp_up_and_100bp_down_tss.mc9nr.feather	top50perTarget	0.8	0.00919503	269.249	0.772397	0.302848	2.55044	0.0107587	0.0398286	Upregulated	HW_vs_CW	obesity_upregulated
E2f1	Sfrp5	TRUE	5	homer__CWGGCGGGAA_E2F1	4.48	r80__500bp_up_and_100bp_down_tss.mc9nr.feather	top50perTarget	0.9	0.0131478	17371.8	3.6663	0.424209	8.64268	5.49085e-18	7.90683e-16	Upregulated	HW_vs_CW	obesity_upregulated
E2f1	Sh3bp1	TRUE	14	homer__CWGGCGGGAA_E2F1	4.48	r80__500bp_up_and_100bp_down_tss.mc9nr.feather	top50perTarget	0.6	0.00854938	144.488	0.560583	0.22437	2.49847	0.0124729	0.0447936	Upregulated	HW_vs_CW	obesity_upregulated
E2f1	Sipa1l1	TRUE	7	homer__CWGGCGGGAA_E2F1	4.48	r80__500bp_up_and_100bp_down_tss.mc9nr.feather	top50perTarget	0.9	0.00961389	6139.81	0.634379	0.162078	3.91402	9.07704e-05	0.000770254	Upregulated	HW_vs_CW	obesity_upregulated
E2f1	Sirpa	TRUE	11	homer__CWGGCGGGAA_E2F1	4.48	r80__500bp_up_and_100bp_down_tss.mc9nr.feather	top50perTarget	0.9	0.00984324	8883.92	1.16249	0.275227	4.22374	2.4028e-05	0.000247145	Upregulated	HW_vs_CW	obesity_upregulated
E2f1	Slc27a6	TRUE	3	homer__CWGGCGGGAA_E2F1	4.48	r80__500bp_up_and_100bp_down_tss.mc9nr.feather	top50perTarget	0.9	0.0129831	49.8694	2.53145	0.411772	6.14771	7.86093e-10	2.64642e-08	Upregulated	HW_vs_CW	obesity_upregulated
E2f1	Slc39a11	TRUE	4	homer__CWGGCGGGAA_E2F1	4.48	r80__500bp_up_and_100bp_down_tss.mc9nr.feather	top50perTarget	1	0.0177759	1427.54	1.15771	0.211618	5.47076	4.48116e-08	1.00812e-06	Upregulated	HW_vs_CW	obesity_upregulated
E2f1	Slc41a1	TRUE	9	homer__CWGGCGGGAA_E2F1	4.48	r80__500bp_up_and_100bp_down_tss.mc9nr.feather	top50perTarget	0.3	0.00925758	3003.83	0.504233	0.146749	3.43603	0.000590314	0.00370529	Upregulated	HW_vs_CW	obesity_upregulated
E2f1	Slc4a7	TRUE	12	homer__CWGGCGGGAA_E2F1	4.48	r80__500bp_up_and_100bp_down_tss.mc9nr.feather	top50perTarget	0.9	0.0142991	3171.04	0.582643	0.1541	3.78096	0.000156227	0.00122547	Upregulated	HW_vs_CW	obesity_upregulated
E2f1	Slc5a3	TRUE	1	homer__CWGGCGGGAA_E2F1	4.48	r80__500bp_up_and_100bp_down_tss.mc9nr.feather	top50perTarget	1	0.0143009	4687.81	0.641824	0.167281	3.8368	0.000124647	0.00101112	Upregulated	HW_vs_CW	obesity_upregulated
E2f1	Slx4ip	TRUE	27	homer__CWGGCGGGAA_E2F1	4.48	r80__500bp_up_and_100bp_down_tss.mc9nr.feather	top50perTarget	1	0.016924	625.092	0.567742	0.11694	4.85498	1.20397e-06	1.81618e-05	Upregulated	HW_vs_CW	obesity_upregulated
E2f1	Smap2	TRUE	2	homer__CWGGCGGGAA_E2F1	4.48	r80__500bp_up_and_100bp_down_tss.mc9nr.feather	top50perTarget	0.9	0.0115994	3257.35	0.613704	0.179219	3.42432	0.000616347	0.00384302	Upregulated	HW_vs_CW	obesity_upregulated
E2f1	Smc4	TRUE	27	homer__CWGGCGGGAA_E2F1	4.48	r80__500bp_up_and_100bp_down_tss.mc9nr.feather	top50perTarget	0.9	0.00944291	2106.35	0.916064	0.145798	6.28309	3.31911e-10	1.22851e-08	Upregulated	HW_vs_CW	obesity_upregulated
E2f1	Snai2	TRUE	7	homer__CWGGCGGGAA_E2F1	4.48	r80__500bp_up_and_100bp_down_tss.mc9nr.feather	top50perTarget	0.9	0.00846388	304.58	0.512654	0.189236	2.70907	0.00674722	0.0274056	Upregulated	HW_vs_CW	obesity_upregulated
E2f1	Socs1	TRUE	4	homer__CWGGCGGGAA_E2F1	4.48	r80__500bp_up_and_100bp_down_tss.mc9nr.feather	top50perTarget	0.8	0.00838323	63.0309	0.957917	0.320418	2.98959	0.00279355	0.0134221	Upregulated	HW_vs_CW	obesity_upregulated
E2f1	Spaca9	TRUE	11	homer__CWGGCGGGAA_E2F1	4.48	r80__500bp_up_and_100bp_down_tss.mc9nr.feather	top50perTarget	0.820783	0.017614	35.8559	2.51699	0.674494	3.73167	0.000190214	0.0014483	Upregulated	HW_vs_CW	obesity_upregulated
E2f1	Spats2	TRUE	7	homer__CWGGCGGGAA_E2F1	4.48	r80__500bp_up_and_100bp_down_tss.mc9nr.feather	top50perTarget	0.5	0.0105812	1338.6	0.527531	0.120661	4.37201	1.2311e-05	0.000137996	Upregulated	HW_vs_CW	obesity_upregulated
E2f1	Spc25	TRUE	10	homer__CWGGCGGGAA_E2F1	4.48	r80__500bp_up_and_100bp_down_tss.mc9nr.feather	top50perTarget	0.7	0.0101216	287.081	1.51332	0.595469	2.54139	0.0110412	0.040607	Upregulated	HW_vs_CW	obesity_upregulated
E2f1	Spdl1	TRUE	14	homer__CWGGCGGGAA_E2F1	4.48	r80__500bp_up_and_100bp_down_tss.mc9nr.feather	top50perTarget	0.9	0.00780944	104.839	2.1526	0.415912	5.17561	2.27164e-07	4.19615e-06	Upregulated	HW_vs_CW	obesity_upregulated
E2f1	Stil	TRUE	12	homer__CWGGCGGGAA_E2F1	4.48	r80__500bp_up_and_100bp_down_tss.mc9nr.feather	top50perTarget	0.9	0.0142136	71.6086	2.12058	0.426328	4.97406	6.55641e-07	1.06194e-05	Upregulated	HW_vs_CW	obesity_upregulated
E2f1	Tbc1d8b	TRUE	10	homer__CWGGCGGGAA_E2F1	4.48	r80__500bp_up_and_100bp_down_tss.mc9nr.feather	top50perTarget	0.9	0.00952951	1308.54	0.748497	0.0968131	7.73136	1.06405e-14	9.32961e-13	Upregulated	HW_vs_CW	obesity_upregulated
E2f1	Tcerg1l	TRUE	4	homer__CWGGCGGGAA_E2F1	4.48	r80__500bp_up_and_100bp_down_tss.mc9nr.feather	top50perTarget	0.9	0.0127746	42.9883	2.45814	0.84674	2.90306	0.00369533	0.0168558	Upregulated	HW_vs_CW	obesity_upregulated
E2f1	Tcf19	TRUE	15	homer__CWGGCGGGAA_E2F1	4.48	r80__500bp_up_and_100bp_down_tss.mc9nr.feather	top50perTarget	0.8	0.00917629	269.274	1.16634	0.177747	6.56178	5.31701e-11	2.34662e-09	Upregulated	HW_vs_CW	obesity_upregulated
E2f1	Tcf3	TRUE	13	homer__CWGGCGGGAA_E2F1	4.48	r80__500bp_up_and_100bp_down_tss.mc9nr.feather	top50perTarget	0.9	0.0162	2415.3	0.504912	0.143249	3.52472	0.000423933	0.00280838	Upregulated	HW_vs_CW	obesity_upregulated
E2f1	Tcirg1	TRUE	14	homer__CWGGCGGGAA_E2F1	4.48	r80__500bp_up_and_100bp_down_tss.mc9nr.feather	top50perTarget	1	0.0159014	4329.2	1.41217	0.274652	5.14168	2.72296e-07	4.94645e-06	Upregulated	HW_vs_CW	obesity_upregulated
E2f1	Tet3	TRUE	12	homer__CWGGCGGGAA_E2F1	4.48	r80__500bp_up_and_100bp_down_tss.mc9nr.feather	top50perTarget	0.3	0.0115907	5667.6	0.786153	0.182666	4.30377	1.67915e-05	0.000181216	Upregulated	HW_vs_CW	obesity_upregulated
E2f1	Tex9	TRUE	9	homer__CWGGCGGGAA_E2F1	4.48	r80__500bp_up_and_100bp_down_tss.mc9nr.feather	top50perTarget	0.8	0.0139465	154.604	2.05147	0.366319	5.60025	2.14045e-08	5.19395e-07	Upregulated	HW_vs_CW	obesity_upregulated
E2f1	Tfr2	TRUE	1	homer__CWGGCGGGAA_E2F1	4.48	r80__500bp_up_and_100bp_down_tss.mc9nr.feather	top50perTarget	0.9	0.00883694	399.658	1.90938	0.612871	3.11547	0.00183652	0.0095119	Upregulated	HW_vs_CW	obesity_upregulated
E2f1	Timeless	TRUE	16	homer__CWGGCGGGAA_E2F1	4.48	r80__500bp_up_and_100bp_down_tss.mc9nr.feather	top50perTarget	0.9	0.0111398	784.275	1.04897	0.154847	6.77426	1.25047e-11	6.2139e-10	Upregulated	HW_vs_CW	obesity_upregulated
E2f1	Tmem14a	TRUE	2	homer__CWGGCGGGAA_E2F1	4.48	r80__500bp_up_and_100bp_down_tss.mc9nr.feather	top50perTarget	0.5	0.0083408	382.662	1.05503	0.181577	5.81037	6.23343e-09	1.71164e-07	Upregulated	HW_vs_CW	obesity_upregulated
E2f1	Tmsb10	TRUE	13	homer__CWGGCGGGAA_E2F1	4.48	r80__500bp_up_and_100bp_down_tss.mc9nr.feather	top50perTarget	0.9	0.00663492	10527.2	0.919384	0.203644	4.51466	6.34173e-06	7.85371e-05	Upregulated	HW_vs_CW	obesity_upregulated
E2f1	Tmsb4x	TRUE	10	homer__CWGGCGGGAA_E2F1	4.48	r80__500bp_up_and_100bp_down_tss.mc9nr.feather	top50perTarget	0.9	0.00943465	42270.3	0.730031	0.213218	3.42387	0.000617373	0.00384819	Upregulated	HW_vs_CW	obesity_upregulated
E2f1	Tnf	TRUE	15	homer__CWGGCGGGAA_E2F1	4.48	r80__500bp_up_and_100bp_down_tss.mc9nr.feather	top50perTarget	0.9	0.0174384	38.2765	1.50666	0.569703	2.64464	0.0081779	0.0319979	Upregulated	HW_vs_CW	obesity_upregulated
E2f1	Tonsl	TRUE	7	homer__CWGGCGGGAA_E2F1	4.48	r80__500bp_up_and_100bp_down_tss.mc9nr.feather	top50perTarget	0.7	0.0104801	130.638	0.584478	0.21247	2.75087	0.0059437	0.0247587	Upregulated	HW_vs_CW	obesity_upregulated
E2f1	Topbp1	TRUE	45	homer__CWGGCGGGAA_E2F1	4.48	r80__500bp_up_and_100bp_down_tss.mc9nr.feather	top50perTarget	0.9	0.0120614	2190.42	0.649875	0.130371	4.9848	6.20245e-07	1.01714e-05	Upregulated	HW_vs_CW	obesity_upregulated
E2f1	Tpm3	TRUE	14	homer__CWGGCGGGAA_E2F1	4.48	r80__500bp_up_and_100bp_down_tss.mc9nr.feather	top50perTarget	1	0.0151557	14732.7	0.508278	0.134598	3.77626	0.000159199	0.00124581	Upregulated	HW_vs_CW	obesity_upregulated
E2f1	Tram2	TRUE	12	homer__CWGGCGGGAA_E2F1	4.48	r80__500bp_up_and_100bp_down_tss.mc9nr.feather	top50perTarget	0.7	0.0161114	1217.33	0.644775	0.240222	2.68408	0.00727296	0.0291036	Upregulated	HW_vs_CW	obesity_upregulated
E2f1	Tril	TRUE	9	homer__CWGGCGGGAA_E2F1	4.48	r80__500bp_up_and_100bp_down_tss.mc9nr.feather	top50perTarget	0.9	0.00898645	1277.02	0.614954	0.220119	2.79373	0.00521035	0.0222609	Upregulated	HW_vs_CW	obesity_upregulated
E2f1	Trim35	TRUE	12	homer__CWGGCGGGAA_E2F1	4.48	r80__500bp_up_and_100bp_down_tss.mc9nr.feather	top50perTarget	0.5	0.00799128	6291.89	0.789981	0.170255	4.63998	3.48436e-06	4.61649e-05	Upregulated	HW_vs_CW	obesity_upregulated
E2f1	Trim36	TRUE	8	homer__CWGGCGGGAA_E2F1	4.48	r80__500bp_up_and_100bp_down_tss.mc9nr.feather	top50perTarget	0.9	0.0130519	270.082	1.19594	0.26422	4.52632	6.00201e-06	7.48942e-05	Upregulated	HW_vs_CW	obesity_upregulated
E2f1	Trim67	TRUE	10	homer__CWGGCGGGAA_E2F1	4.48	r80__500bp_up_and_100bp_down_tss.mc9nr.feather	top50perTarget	0.8	0.00957618	835.415	1.83294	0.446042	4.10935	3.96774e-05	0.000379979	Upregulated	HW_vs_CW	obesity_upregulated
E2f1	Tspan6	TRUE	7	homer__CWGGCGGGAA_E2F1	4.48	r80__500bp_up_and_100bp_down_tss.mc9nr.feather	top50perTarget	0.8	0.00880327	1314.92	0.792151	0.218696	3.62215	0.000292167	0.00206442	Upregulated	HW_vs_CW	obesity_upregulated
E2f1	Ttk	TRUE	6	homer__CWGGCGGGAA_E2F1	4.48	r80__500bp_up_and_100bp_down_tss.mc9nr.feather	top50perTarget	0.9	0.00871849	51.8106	2.30161	0.622562	3.697	0.00021816	0.0016241	Upregulated	HW_vs_CW	obesity_upregulated
E2f1	Ttyh3	TRUE	1	homer__CWGGCGGGAA_E2F1	4.48	r80__500bp_up_and_100bp_down_tss.mc9nr.feather	top50perTarget	0.9	0.0083818	2662.47	0.913295	0.155907	5.85794	4.68642e-09	1.32419e-07	Upregulated	HW_vs_CW	obesity_upregulated
E2f1	Tyms	TRUE	1	homer__CWGGCGGGAA_E2F1	4.48	r80__500bp_up_and_100bp_down_tss.mc9nr.feather	top50perTarget	0.9	0.00969398	367.094	0.709706	0.188413	3.76675	0.000165387	0.00128446	Upregulated	HW_vs_CW	obesity_upregulated
E2f1	Unc79	TRUE	3	homer__CWGGCGGGAA_E2F1	4.48	r80__500bp_up_and_100bp_down_tss.mc9nr.feather	top50perTarget	1	0.0104892	683.289	3.63848	0.455163	7.9938	1.30837e-15	1.30361e-13	Upregulated	HW_vs_CW	obesity_upregulated
E2f1	Vac14	TRUE	3	homer__CWGGCGGGAA_E2F1	4.48	r80__500bp_up_and_100bp_down_tss.mc9nr.feather	top50perTarget	0.5	0.0216048	3299.23	0.826951	0.14129	5.85285	4.8323e-09	1.36188e-07	Upregulated	HW_vs_CW	obesity_upregulated
E2f1	Vsig8	TRUE	4	homer__CWGGCGGGAA_E2F1	4.48	r80__500bp_up_and_100bp_down_tss.mc9nr.feather	top50perTarget	0.8	0.011473	844.592	7.10943	0.474438	14.9849	9.20992e-51	2.27117e-47	Upregulated	HW_vs_CW	obesity_upregulated
E2f1	Wdr62	TRUE	19	homer__CWGGCGGGAA_E2F1	4.48	r80__500bp_up_and_100bp_down_tss.mc9nr.feather	top50perTarget	0.6	0.00621089	1107.38	0.691034	0.243053	2.84315	0.00446704	0.0197193	Upregulated	HW_vs_CW	obesity_upregulated
E2f1	Wdr76	TRUE	7	homer__CWGGCGGGAA_E2F1	4.48	r80__500bp_up_and_100bp_down_tss.mc9nr.feather	top50perTarget	0.9	0.0141483	331.69	0.556497	0.207048	2.68777	0.00719304	0.0288189	Upregulated	HW_vs_CW	obesity_upregulated
E2f1	Wipf1	TRUE	11	homer__CWGGCGGGAA_E2F1	4.48	r80__500bp_up_and_100bp_down_tss.mc9nr.feather	top50perTarget	1	0.0114604	4387.26	0.614068	0.201573	3.04639	0.00231608	0.01151	Upregulated	HW_vs_CW	obesity_upregulated
E2f1	Xkr4	TRUE	2	homer__CWGGCGGGAA_E2F1	4.48	r80__500bp_up_and_100bp_down_tss.mc9nr.feather	top50perTarget	0.6	0.0166326	109.667	1.97226	0.522994	3.7711	0.000162529	0.00126584	Upregulated	HW_vs_CW	obesity_upregulated
E2f1	Xrcc2	TRUE	12	homer__CWGGCGGGAA_E2F1	4.48	r80__500bp_up_and_100bp_down_tss.mc9nr.feather	top50perTarget	0.9	0.0111017	563.901	0.581188	0.152189	3.81886	0.000134068	0.00107298	Upregulated	HW_vs_CW	obesity_upregulated
E2f1	Zdhhc2	TRUE	4	homer__CWGGCGGGAA_E2F1	4.48	r80__500bp_up_and_100bp_down_tss.mc9nr.feather	top50perTarget	0.9	0.00867045	1129.5	1.07197	0.187195	5.7265	1.02522e-08	2.67532e-07	Upregulated	HW_vs_CW	obesity_upregulated
E2f1	Zfp36l2	TRUE	18	homer__CWGGCGGGAA_E2F1	4.48	r80__500bp_up_and_100bp_down_tss.mc9nr.feather	top50perTarget	0.8	0.0106086	9228.16	0.75992	0.257569	2.95036	0.00317409	0.0149662	Upregulated	HW_vs_CW	obesity_upregulated
E2f1	Zfp423	TRUE	11	homer__CWGGCGGGAA_E2F1	4.48	r80__500bp_up_and_100bp_down_tss.mc9nr.feather	top50perTarget	0.7	0.0108152	3672.15	0.620015	0.242983	2.55168	0.0107206	0.0397251	Upregulated	HW_vs_CW	obesity_upregulated
E2f1	Zranb3	TRUE	13	homer__CWGGCGGGAA_E2F1	4.48	r80__500bp_up_and_100bp_down_tss.mc9nr.feather	top50perTarget	1	0.0100318	613.01	1.67434	0.282664	5.92344	3.15281e-09	9.26954e-08	Upregulated	HW_vs_CW	obesity_upregulated
E2f1	Adh6-ps1	TRUE	1	cisbp__M4672	4.36	r80__500bp_up_and_100bp_down_tss.mc9nr.feather	top50perTarget	0.9	0.00913522	57.5299	3.12355	0.606496	5.15016	2.60264e-07	4.74131e-06	Upregulated	HW_vs_CW	obesity_upregulated
E2f1	Aplnr	TRUE	1	cisbp__M4672	4.36	r80__500bp_up_and_100bp_down_tss.mc9nr.feather	top50perTarget	0.9	0.0147914	2869.35	2.70069	0.330819	8.16367	3.25008e-16	3.52294e-14	Upregulated	HW_vs_CW	obesity_upregulated
E2f1	Atf3	TRUE	12	cisbp__M4672	4.36	r80__500bp_up_and_100bp_down_tss.mc9nr.feather	top50perTarget	0.9	0.0131081	2915.79	2.45989	0.210676	11.6762	1.68758e-31	1.3317e-28	Upregulated	HW_vs_CW	obesity_upregulated
E2f1	Bub1	TRUE	5	cisbp__M4672	4.36	r80__500bp_up_and_100bp_down_tss.mc9nr.feather	top50perTarget	1	0.0128738	89.8227	2.3688	0.485929	4.8748	1.08921e-06	1.65801e-05	Upregulated	HW_vs_CW	obesity_upregulated
E2f1	Ccnf	TRUE	11	cisbp__M4672	4.36	r80__500bp_up_and_100bp_down_tss.mc9nr.feather	top50perTarget	0.9	0.0180462	184.03	0.909607	0.269421	3.37615	0.000735074	0.00445284	Upregulated	HW_vs_CW	obesity_upregulated
E2f1	Cd180	TRUE	1	cisbp__M4672	4.36	r80__500bp_up_and_100bp_down_tss.mc9nr.feather	top50perTarget	1	0.0152837	1032.65	2.67514	0.415604	6.43675	1.22057e-10	4.99571e-09	Upregulated	HW_vs_CW	obesity_upregulated
E2f1	Cdkn2b	TRUE	2	cisbp__M4672	4.36	r80__500bp_up_and_100bp_down_tss.mc9nr.feather	top50perTarget	0.9	0.0112915	385.822	0.886368	0.169199	5.23861	1.61793e-07	3.15401e-06	Upregulated	HW_vs_CW	obesity_upregulated
E2f1	Cux2	TRUE	14	cisbp__M4672	4.36	r80__500bp_up_and_100bp_down_tss.mc9nr.feather	top50perTarget	0.8	0.00784468	308.138	2.00134	0.71864	2.7849	0.0053544	0.0227507	Upregulated	HW_vs_CW	obesity_upregulated
E2f1	Dnmt3aos	TRUE	1	cisbp__M4672	4.36	r80__500bp_up_and_100bp_down_tss.mc9nr.feather	top50perTarget	1	0.00968909	71.1393	4.76783	0.720879	6.61392	3.74283e-11	1.68197e-09	Upregulated	HW_vs_CW	obesity_upregulated
E2f1	Frmd4a	TRUE	8	cisbp__M4672	4.36	r80__500bp_up_and_100bp_down_tss.mc9nr.feather	top50perTarget	1	0.0119452	2582.07	0.506797	0.163427	3.10106	0.00192832	0.00989131	Upregulated	HW_vs_CW	obesity_upregulated
E2f1	Haglr	TRUE	1	cisbp__M4672	4.36	r80__500bp_up_and_100bp_down_tss.mc9nr.feather	top50perTarget	0.7	0.0119994	26.6396	2.21388	0.718947	3.07934	0.00207458	0.010513	Upregulated	HW_vs_CW	obesity_upregulated
E2f1	Ier5l	TRUE	27	cisbp__M4672	4.36	r80__500bp_up_and_100bp_down_tss.mc9nr.feather	top50perTarget	0.9	0.0145147	460.155	0.830753	0.270605	3.06998	0.00214075	0.0107847	Upregulated	HW_vs_CW	obesity_upregulated
E2f1	Ifi30	TRUE	3	cisbp__M4672	4.36	r80__500bp_up_and_100bp_down_tss.mc9nr.feather	top50perTarget	0.9	0.0129627	2054.72	1.02649	0.291811	3.51764	0.000435401	0.00287373	Upregulated	HW_vs_CW	obesity_upregulated
E2f1	Il7	TRUE	1	cisbp__M4672	4.36	r80__500bp_up_and_100bp_down_tss.mc9nr.feather	top50perTarget	0.8	0.0105622	130.517	1.03906	0.334445	3.10683	0.00189103	0.0097335	Upregulated	HW_vs_CW	obesity_upregulated
E2f1	Iqgap1	TRUE	4	cisbp__M4672	4.36	r80__500bp_up_and_100bp_down_tss.mc9nr.feather	top50perTarget	1	0.0100894	15928.5	0.714046	0.190179	3.75459	0.000173623	0.0013385	Upregulated	HW_vs_CW	obesity_upregulated
E2f1	Lmo2	TRUE	9	cisbp__M4672	4.36	r80__500bp_up_and_100bp_down_tss.mc9nr.feather	top50perTarget	0.9	0.0151485	2090.7	0.835825	0.244442	3.41932	0.000627783	0.00390076	Upregulated	HW_vs_CW	obesity_upregulated
E2f1	Mbnl3	TRUE	30	cisbp__M4672	4.36	r80__500bp_up_and_100bp_down_tss.mc9nr.feather	top50perTarget	0.9	0.00975082	364.986	1.31628	0.273579	4.81132	1.49934e-06	2.19592e-05	Upregulated	HW_vs_CW	obesity_upregulated
E2f1	Phf8	TRUE	14	cisbp__M4672	4.36	r80__500bp_up_and_100bp_down_tss.mc9nr.feather	top50perTarget	0.6	0.00806336	6404.81	0.750822	0.285171	2.63289	0.00846619	0.0329358	Upregulated	HW_vs_CW	obesity_upregulated
E2f1	Rtn4rl1	TRUE	11	cisbp__M4672	4.36	r80__500bp_up_and_100bp_down_tss.mc9nr.feather	top50perTarget	0.8	0.0123234	2574.61	1.54571	0.268097	5.7655	8.1414e-09	2.15878e-07	Upregulated	HW_vs_CW	obesity_upregulated
E2f1	Scn2a	TRUE	11	cisbp__M4672	4.36	r80__500bp_up_and_100bp_down_tss.mc9nr.feather	top50perTarget	0.7	0.013663	156.967	0.687502	0.231163	2.9741	0.00293854	0.0140061	Upregulated	HW_vs_CW	obesity_upregulated
E2f1	Sh3kbp1	TRUE	9	cisbp__M4672	4.36	r80__500bp_up_and_100bp_down_tss.mc9nr.feather	top50perTarget	0.7	0.00680021	4068.95	1.02109	0.205404	4.97112	6.65661e-07	1.07553e-05	Upregulated	HW_vs_CW	obesity_upregulated
E2f1	Ubash3b	TRUE	4	cisbp__M4672	4.36	r80__500bp_up_and_100bp_down_tss.mc9nr.feather	top50perTarget	0.7	0.0113775	628.666	1.63195	0.314717	5.18543	2.15517e-07	4.02727e-06	Upregulated	HW_vs_CW	obesity_upregulated
E2f1	Ube2c	TRUE	1	cisbp__M4672	4.36	r80__500bp_up_and_100bp_down_tss.mc9nr.feather	top50perTarget	0.7	0.0132603	303.662	1.87067	0.317172	5.89795	3.68043e-09	1.07408e-07	Upregulated	HW_vs_CW	obesity_upregulated
E2f1	Zwilch	TRUE	14	cisbp__M4672	4.36	r80__500bp_up_and_100bp_down_tss.mc9nr.feather	top50perTarget	0.9	0.0100978	149.743	1.48011	0.26275	5.63314	1.76956e-08	4.35828e-07	Upregulated	HW_vs_CW	obesity_upregulated
E2f1	Arhgap11a	TRUE	25	transfac_pro__M00918	4.3	r80__500bp_up_and_100bp_down_tss.mc9nr.feather	top1sd	0.9	0.0149049	798.367	1.02771	0.276666	3.71463	0.000203501	0.00153584	Upregulated	HW_vs_CW	obesity_upregulated
E2f1	6530402F18Rik	TRUE	4	cisbp__M5352	4.27	r80__10kb_up_and_down_tss.mc9nr.feather	top50perTarget	0.7	0.00597334	758.441	0.637878	0.242938	2.62569	0.00864744	0.0334586	Upregulated	HW_vs_CW	obesity_upregulated
E2f1	A930003O13Rik	TRUE	2	cisbp__M5352	4.27	r80__10kb_up_and_down_tss.mc9nr.feather	top50perTarget	0.9	0.0127481	23.2856	1.0556	0.426827	2.47314	0.0133932	0.0474196	Upregulated	HW_vs_CW	obesity_upregulated
E2f1	Abhd12	TRUE	2	cisbp__M5352	4.27	r80__10kb_up_and_down_tss.mc9nr.feather	top50perTarget	0.9	0.0122545	9758.48	0.686364	0.237459	2.89045	0.00384689	0.0174183	Upregulated	HW_vs_CW	obesity_upregulated
E2f1	Actb	TRUE	9	cisbp__M5352	4.27	r80__10kb_up_and_down_tss.mc9nr.feather	top50perTarget	1	0.0103779	115039	0.642913	0.200363	3.20873	0.00133321	0.00731462	Upregulated	HW_vs_CW	obesity_upregulated
E2f1	Alcam	TRUE	9	cisbp__M5352	4.27	r80__10kb_up_and_down_tss.mc9nr.feather	top50perTarget	0.9	0.00820169	3920.63	1.10878	0.16626	6.66896	2.57615e-11	1.21584e-09	Upregulated	HW_vs_CW	obesity_upregulated
E2f1	Bmp3	TRUE	4	cisbp__M5352	4.27	r80__10kb_up_and_down_tss.mc9nr.feather	top50perTarget	0.7	0.0114154	3749.47	2.4256	0.458725	5.28771	1.23857e-07	2.48823e-06	Upregulated	HW_vs_CW	obesity_upregulated
E2f1	Crtac1	TRUE	7	cisbp__M5352	4.27	r80__10kb_up_and_down_tss.mc9nr.feather	top50perTarget	0.7	0.0143009	2720.57	2.13794	0.465249	4.59527	4.32188e-06	5.58729e-05	Upregulated	HW_vs_CW	obesity_upregulated
E2f1	Gm21188	TRUE	2	cisbp__M5352	4.27	r80__10kb_up_and_down_tss.mc9nr.feather	top50perTarget	0.9	0.0123219	282.047	0.977081	0.379205	2.57666	0.00997608	0.0375487	Upregulated	HW_vs_CW	obesity_upregulated
E2f1	Jade3	TRUE	6	cisbp__M5352	4.27	r80__10kb_up_and_down_tss.mc9nr.feather	top50perTarget	1	0.00860461	816.832	0.720095	0.167296	4.30431	1.67505e-05	0.000180872	Upregulated	HW_vs_CW	obesity_upregulated
E2f1	Ncor2	TRUE	3	cisbp__M5352	4.27	r80__10kb_up_and_down_tss.mc9nr.feather	top50perTarget	0.5	0.00857409	8371.55	0.508756	0.0824863	6.16777	6.92597e-10	2.36803e-08	Upregulated	HW_vs_CW	obesity_upregulated
E2f1	Pdgfa	TRUE	2	cisbp__M5352	4.27	r80__10kb_up_and_down_tss.mc9nr.feather	top50perTarget	0.872082	0.00857537	837.872	0.843135	0.191895	4.39373	1.11425e-05	0.000127063	Upregulated	HW_vs_CW	obesity_upregulated
E2f1	Sash3	TRUE	3	cisbp__M5352	4.27	r80__10kb_up_and_down_tss.mc9nr.feather	top50perTarget	0.8	0.0124262	1095.44	1.36334	0.380949	3.57881	0.000345167	0.00237015	Upregulated	HW_vs_CW	obesity_upregulated
E2f1	Tmem229b	TRUE	6	cisbp__M5352	4.27	r80__10kb_up_and_down_tss.mc9nr.feather	top50perTarget	1	0.0117924	1573.49	0.81833	0.268525	3.0475	0.00230752	0.0114782	Upregulated	HW_vs_CW	obesity_upregulated
E2f1	Ifit3b	TRUE	2	tfdimers__MD00007	4.17	r80__10kb_up_and_down_tss.mc9nr.feather	top5perTarget	0.9	0.0128372	482.409	1.62086	0.176662	9.17495	4.51771e-20	9.38162e-18	Upregulated	HW_vs_CW	obesity_upregulated
E2f1	Lmntd1	TRUE	2	tfdimers__MD00007	4.17	r80__10kb_up_and_down_tss.mc9nr.feather	top5perTarget	1	0.0198398	265.719	1.56584	0.21729	7.20622	5.75256e-13	3.59135e-11	Upregulated	HW_vs_CW	obesity_upregulated
E2f1	Parp9	TRUE	1	tfdimers__MD00007	4.17	r80__10kb_up_and_down_tss.mc9nr.feather	top5perTarget	0.7	0.0160699	4367.29	0.779143	0.169676	4.59194	4.39145e-06	5.66914e-05	Upregulated	HW_vs_CW	obesity_upregulated
E2f1	Sdhaf4	TRUE	1	tfdimers__MD00007	4.17	r80__10kb_up_and_down_tss.mc9nr.feather	top5perTarget	0.5	0.014607	343.666	0.666856	0.151889	4.39041	1.13138e-05	0.000128719	Upregulated	HW_vs_CW	obesity_upregulated
E2f1	Taok3	TRUE	12	tfdimers__MD00007	4.17	r80__10kb_up_and_down_tss.mc9nr.feather	top5perTarget	0.9	0.0195198	2545.54	0.738437	0.202214	3.65176	0.000260454	0.00187527	Upregulated	HW_vs_CW	obesity_upregulated
E2f1	A730020E08Rik	TRUE	5	transfac_pro__M08875	4.03	r80__500bp_up_and_100bp_down_tss.mc9nr.feather	w0.005	0.666886	0.00584094	25.2191	1.42892	0.436061	3.27688	0.00104961	0.00599847	Upregulated	HW_vs_CW	obesity_upregulated
E2f1	Akirin1	TRUE	9	transfac_pro__M08875	4.03	r80__500bp_up_and_100bp_down_tss.mc9nr.feather	w0.005	1	0.0116209	4537.38	0.641876	0.127641	5.02874	4.93711e-07	8.34612e-06	Upregulated	HW_vs_CW	obesity_upregulated
E2f1	Alg3	TRUE	5	transfac_pro__M08875	4.03	r80__500bp_up_and_100bp_down_tss.mc9nr.feather	w0.005	0.5	0.00568399	749.361	0.729412	0.174057	4.19064	2.78168e-05	0.000281132	Upregulated	HW_vs_CW	obesity_upregulated
E2f1	Ammecr1	TRUE	4	transfac_pro__M08875	4.03	r80__500bp_up_and_100bp_down_tss.mc9nr.feather	w0.005	0.8	0.0056823	611.835	0.572174	0.188478	3.03576	0.00239934	0.0118424	Upregulated	HW_vs_CW	obesity_upregulated
E2f1	Asap1	TRUE	8	transfac_pro__M08875	4.03	r80__500bp_up_and_100bp_down_tss.mc9nr.feather	w0.005	0.9	0.00737099	5717.12	0.521856	0.135336	3.85602	0.00011525	0.000947393	Upregulated	HW_vs_CW	obesity_upregulated
E2f1	Bmf	TRUE	15	transfac_pro__M08875	4.03	r80__500bp_up_and_100bp_down_tss.mc9nr.feather	w0.005	0.8	0.00790737	1057.17	0.562653	0.220397	2.55291	0.0106828	0.0396372	Upregulated	HW_vs_CW	obesity_upregulated
E2f1	Bmp1	TRUE	8	transfac_pro__M08875	4.03	r80__500bp_up_and_100bp_down_tss.mc9nr.feather	w0.005	0.6	0.00614241	5240.52	0.680314	0.205815	3.30546	0.000948215	0.00551973	Upregulated	HW_vs_CW	obesity_upregulated
E2f1	Brca1	TRUE	12	transfac_pro__M08875	4.03	r80__500bp_up_and_100bp_down_tss.mc9nr.feather	w0.005	0.9	0.00701846	210.321	2.90219	0.440177	6.59325	4.30306e-11	1.92061e-09	Upregulated	HW_vs_CW	obesity_upregulated
E2f1	Camk1d	TRUE	7	transfac_pro__M08875	4.03	r80__500bp_up_and_100bp_down_tss.mc9nr.feather	w0.005	0.9	0.00771765	1353.73	0.873997	0.257001	3.40075	0.00067202	0.0041301	Upregulated	HW_vs_CW	obesity_upregulated
E2f1	Ccne1	TRUE	5	transfac_pro__M08875	4.03	r80__500bp_up_and_100bp_down_tss.mc9nr.feather	w0.005	1	0.00710292	224.865	1.50715	0.295136	5.10665	3.27926e-07	5.8277e-06	Upregulated	HW_vs_CW	obesity_upregulated
E2f1	Cdca7l	TRUE	7	transfac_pro__M08875	4.03	r80__500bp_up_and_100bp_down_tss.mc9nr.feather	w0.005	0.7	0.00693511	386.406	1.73566	0.294563	5.89231	3.80825e-09	1.10484e-07	Upregulated	HW_vs_CW	obesity_upregulated
E2f1	Cdk1	TRUE	10	transfac_pro__M08875	4.03	r80__500bp_up_and_100bp_down_tss.mc9nr.feather	w0.005	1	0.00740121	344.567	1.60868	0.383942	4.18989	2.79086e-05	0.000281915	Upregulated	HW_vs_CW	obesity_upregulated
E2f1	Cdk6	TRUE	8	transfac_pro__M08875	4.03	r80__500bp_up_and_100bp_down_tss.mc9nr.feather	w0.005	0.9	0.00758406	1224.96	0.546773	0.205221	2.66431	0.00771462	0.0305059	Upregulated	HW_vs_CW	obesity_upregulated
E2f1	Cenph	TRUE	9	transfac_pro__M08875	4.03	r80__500bp_up_and_100bp_down_tss.mc9nr.feather	w0.005	0.8	0.00686264	29.1249	2.89338	0.597771	4.84028	1.29656e-06	1.9363e-05	Upregulated	HW_vs_CW	obesity_upregulated
E2f1	Cfl1	TRUE	5	transfac_pro__M08875	4.03	r80__500bp_up_and_100bp_down_tss.mc9nr.feather	w0.005	1	0.0072902	18964.2	0.58941	0.167724	3.51417	0.000441138	0.00290389	Upregulated	HW_vs_CW	obesity_upregulated
E2f1	Cnpy4	TRUE	7	transfac_pro__M08875	4.03	r80__500bp_up_and_100bp_down_tss.mc9nr.feather	w0.005	0.9	0.00806071	1391	0.556968	0.103843	5.36357	8.15918e-08	1.73266e-06	Upregulated	HW_vs_CW	obesity_upregulated
E2f1	Cntln	TRUE	10	transfac_pro__M08875	4.03	r80__500bp_up_and_100bp_down_tss.mc9nr.feather	w0.005	0.8	0.00563036	1519.62	0.653437	0.188018	3.47539	0.000510116	0.0032727	Upregulated	HW_vs_CW	obesity_upregulated
E2f1	Cntrl	TRUE	10	transfac_pro__M08875	4.03	r80__500bp_up_and_100bp_down_tss.mc9nr.feather	w0.005	0.9	0.00743254	2086.66	0.551397	0.146525	3.76317	0.000167775	0.00130054	Upregulated	HW_vs_CW	obesity_upregulated
E2f1	Creb3l2	TRUE	9	transfac_pro__M08875	4.03	r80__500bp_up_and_100bp_down_tss.mc9nr.feather	w0.005	0.8	0.00514498	6430	0.694527	0.215936	3.21635	0.00129832	0.00716653	Upregulated	HW_vs_CW	obesity_upregulated
E2f1	D930048N14Rik	TRUE	8	transfac_pro__M08875	4.03	r80__500bp_up_and_100bp_down_tss.mc9nr.feather	w0.005	0.9	0.00552553	296.473	0.65275	0.186675	3.49672	0.000471011	0.0030738	Upregulated	HW_vs_CW	obesity_upregulated
E2f1	Ddias	TRUE	7	transfac_pro__M08875	4.03	r80__500bp_up_and_100bp_down_tss.mc9nr.feather	w0.005	0.8	0.00689216	55.1738	1.59376	0.365978	4.35479	1.33194e-05	0.000148622	Upregulated	HW_vs_CW	obesity_upregulated
E2f1	Disp1	TRUE	6	transfac_pro__M08875	4.03	r80__500bp_up_and_100bp_down_tss.mc9nr.feather	w0.005	0.8	0.0078319	885.351	0.716923	0.189713	3.779	0.000157462	0.00123368	Upregulated	HW_vs_CW	obesity_upregulated
E2f1	Dnmt1	TRUE	15	transfac_pro__M08875	4.03	r80__500bp_up_and_100bp_down_tss.mc9nr.feather	w0.005	0.9	0.00616217	2591.99	0.598304	0.196053	3.05174	0.00227518	0.0113374	Upregulated	HW_vs_CW	obesity_upregulated
E2f1	Dtl	TRUE	10	transfac_pro__M08875	4.03	r80__500bp_up_and_100bp_down_tss.mc9nr.feather	w0.005	0.9	0.00559948	159.623	2.28099	0.302233	7.54714	4.44926e-14	3.41537e-12	Upregulated	HW_vs_CW	obesity_upregulated
E2f1	Dusp10	TRUE	6	transfac_pro__M08875	4.03	r80__500bp_up_and_100bp_down_tss.mc9nr.feather	w0.005	0.6	0.00530343	2319.65	1.20637	0.319647	3.77407	0.000160608	0.00125385	Upregulated	HW_vs_CW	obesity_upregulated
E2f1	Dusp5	TRUE	9	transfac_pro__M08875	4.03	r80__500bp_up_and_100bp_down_tss.mc9nr.feather	w0.005	0.8	0.00829666	386.022	1.5546	0.544352	2.85586	0.00429198	0.0190489	Upregulated	HW_vs_CW	obesity_upregulated
E2f1	Espl1	TRUE	8	transfac_pro__M08875	4.03	r80__500bp_up_and_100bp_down_tss.mc9nr.feather	w0.005	0.9	0.00937293	249.114	0.858292	0.314311	2.73071	0.0063198	0.0260286	Upregulated	HW_vs_CW	obesity_upregulated
E2f1	Exo1	TRUE	6	transfac_pro__M08875	4.03	r80__500bp_up_and_100bp_down_tss.mc9nr.feather	w0.005	0.9	0.00638658	38.2746	3.28401	0.731062	4.49211	7.05196e-06	8.61431e-05	Upregulated	HW_vs_CW	obesity_upregulated
E2f1	Exoc4	TRUE	8	transfac_pro__M08875	4.03	r80__500bp_up_and_100bp_down_tss.mc9nr.feather	w0.005	0.3	0.00528529	4210.66	0.771572	0.11088	6.9586	3.43668e-12	1.8575e-10	Upregulated	HW_vs_CW	obesity_upregulated
E2f1	Fam184a	TRUE	3	transfac_pro__M08875	4.03	r80__500bp_up_and_100bp_down_tss.mc9nr.feather	w0.005	1	0.00866133	375.538	1.75645	0.228884	7.67399	1.66732e-14	1.4178e-12	Upregulated	HW_vs_CW	obesity_upregulated
E2f1	Fkbp10	TRUE	8	transfac_pro__M08875	4.03	r80__500bp_up_and_100bp_down_tss.mc9nr.feather	w0.005	0.8	0.00615426	1462.36	0.637623	0.156179	4.08264	4.45263e-05	0.000417497	Upregulated	HW_vs_CW	obesity_upregulated
E2f1	Fmnl1	TRUE	3	transfac_pro__M08875	4.03	r80__500bp_up_and_100bp_down_tss.mc9nr.feather	w0.005	0.9	0.00806746	2168.32	0.862328	0.204225	4.22245	2.4166e-05	0.000247919	Upregulated	HW_vs_CW	obesity_upregulated
E2f1	Gins2	TRUE	11	transfac_pro__M08875	4.03	r80__500bp_up_and_100bp_down_tss.mc9nr.feather	w0.005	1	0.00746076	341.141	0.874331	0.243135	3.59607	0.000323059	0.0022457	Upregulated	HW_vs_CW	obesity_upregulated
E2f1	Gins3	TRUE	10	transfac_pro__M08875	4.03	r80__500bp_up_and_100bp_down_tss.mc9nr.feather	w0.005	0.9	0.00740476	169.09	0.713568	0.21509	3.31753	0.000908159	0.00532743	Upregulated	HW_vs_CW	obesity_upregulated
E2f1	Gprin1	TRUE	9	transfac_pro__M08875	4.03	r80__500bp_up_and_100bp_down_tss.mc9nr.feather	w0.005	0.8	0.00782743	79.7895	1.64741	0.560381	2.9398	0.00328423	0.0153643	Upregulated	HW_vs_CW	obesity_upregulated
E2f1	Grb2	TRUE	7	transfac_pro__M08875	4.03	r80__500bp_up_and_100bp_down_tss.mc9nr.feather	w0.005	1	0.00865755	6848.97	0.510424	0.141729	3.60142	0.000316487	0.00220858	Upregulated	HW_vs_CW	obesity_upregulated
E2f1	Hmga2	TRUE	10	transfac_pro__M08875	4.03	r80__500bp_up_and_100bp_down_tss.mc9nr.feather	w0.005	1	0.00674694	44.1691	4.7283	1.23414	3.83126	0.000127489	0.00102741	Upregulated	HW_vs_CW	obesity_upregulated
E2f1	Hoxc5	TRUE	1	transfac_pro__M08875	4.03	r80__500bp_up_and_100bp_down_tss.mc9nr.feather	w0.005	0.4	0.00548745	785.687	0.887448	0.176587	5.02554	5.02006e-07	8.45736e-06	Upregulated	HW_vs_CW	obesity_upregulated
E2f1	Hspa14	TRUE	7	transfac_pro__M08875	4.03	r80__500bp_up_and_100bp_down_tss.mc9nr.feather	w0.005	0.9	0.00734399	1794.71	0.815771	0.142245	5.73498	9.75266e-09	2.55852e-07	Upregulated	HW_vs_CW	obesity_upregulated
E2f1	Kcnk2	TRUE	10	transfac_pro__M08875	4.03	r80__500bp_up_and_100bp_down_tss.mc9nr.feather	w0.005	0.4	0.0057934	584.257	1.33973	0.349099	3.83768	0.000124203	0.00100834	Upregulated	HW_vs_CW	obesity_upregulated
E2f1	Kif11	TRUE	11	transfac_pro__M08875	4.03	r80__500bp_up_and_100bp_down_tss.mc9nr.feather	w0.005	0.9	0.00521875	283.522	1.34989	0.280157	4.81834	1.44758e-06	2.13278e-05	Upregulated	HW_vs_CW	obesity_upregulated
E2f1	Kif15	TRUE	10	transfac_pro__M08875	4.03	r80__500bp_up_and_100bp_down_tss.mc9nr.feather	w0.005	0.7	0.00510402	100.323	1.20301	0.441855	2.72263	0.00647644	0.0264912	Upregulated	HW_vs_CW	obesity_upregulated
E2f1	Klf14	TRUE	7	transfac_pro__M08875	4.03	r80__500bp_up_and_100bp_down_tss.mc9nr.feather	w0.005	0.7	0.0110752	461.307	2.71956	0.623684	4.36048	1.29776e-05	0.000144973	Upregulated	HW_vs_CW	obesity_upregulated
E2f1	Kntc1	TRUE	11	transfac_pro__M08875	4.03	r80__500bp_up_and_100bp_down_tss.mc9nr.feather	w0.005	0.7	0.00733348	109.144	2.11238	0.387202	5.4555	4.88351e-08	1.08371e-06	Upregulated	HW_vs_CW	obesity_upregulated
E2f1	Lsp1	TRUE	2	transfac_pro__M08875	4.03	r80__500bp_up_and_100bp_down_tss.mc9nr.feather	w0.005	0.5	0.0138147	4757.98	0.806852	0.247201	3.26395	0.00109871	0.00623929	Upregulated	HW_vs_CW	obesity_upregulated
E2f1	Lypd1	TRUE	9	transfac_pro__M08875	4.03	r80__500bp_up_and_100bp_down_tss.mc9nr.feather	w0.005	0.7	0.00673622	61.6998	1.77056	0.390583	4.53311	5.81203e-06	7.26614e-05	Upregulated	HW_vs_CW	obesity_upregulated
E2f1	Mtss1	TRUE	9	transfac_pro__M08875	4.03	r80__500bp_up_and_100bp_down_tss.mc9nr.feather	w0.005	0.9	0.00828858	4349.7	0.608842	0.111096	5.48032	4.24546e-08	9.64912e-07	Upregulated	HW_vs_CW	obesity_upregulated
E2f1	Mybl2	TRUE	10	transfac_pro__M08875	4.03	r80__500bp_up_and_100bp_down_tss.mc9nr.feather	w0.005	0.9	0.00503339	125.315	0.801183	0.29732	2.69468	0.00704563	0.0283434	Upregulated	HW_vs_CW	obesity_upregulated
E2f1	Myo1c	TRUE	7	transfac_pro__M08875	4.03	r80__500bp_up_and_100bp_down_tss.mc9nr.feather	w0.005	0.7	0.00734512	27915.7	0.511407	0.131174	3.89869	9.67127e-05	0.000813624	Upregulated	HW_vs_CW	obesity_upregulated
E2f1	Nfkbid	TRUE	5	transfac_pro__M08875	4.03	r80__500bp_up_and_100bp_down_tss.mc9nr.feather	w0.005	0.9	0.00783248	150.329	1.51606	0.408228	3.71376	0.000204205	0.00154056	Upregulated	HW_vs_CW	obesity_upregulated
E2f1	Nup93	TRUE	4	transfac_pro__M08875	4.03	r80__500bp_up_and_100bp_down_tss.mc9nr.feather	w0.005	0.7	0.00945104	1630.02	0.67822	0.214138	3.1672	0.00153913	0.00823786	Upregulated	HW_vs_CW	obesity_upregulated
E2f1	Oip5	TRUE	11	transfac_pro__M08875	4.03	r80__500bp_up_and_100bp_down_tss.mc9nr.feather	w0.005	1	0.00593339	73.7118	1.20799	0.300077	4.02561	5.6828e-05	0.000514032	Upregulated	HW_vs_CW	obesity_upregulated
E2f1	Olfm1	TRUE	9	transfac_pro__M08875	4.03	r80__500bp_up_and_100bp_down_tss.mc9nr.feather	w0.005	0.9	0.00702628	4194.29	2.00828	0.22078	9.09629	9.34703e-20	1.82572e-17	Upregulated	HW_vs_CW	obesity_upregulated
E2f1	Parp3	TRUE	1	transfac_pro__M08875	4.03	r80__500bp_up_and_100bp_down_tss.mc9nr.feather	w0.005	0.6	0.00544453	6200.72	1.09178	0.174633	6.25188	4.05546e-10	1.4707e-08	Upregulated	HW_vs_CW	obesity_upregulated
E2f1	Pask	TRUE	11	transfac_pro__M08875	4.03	r80__500bp_up_and_100bp_down_tss.mc9nr.feather	w0.005	0.8	0.00566407	147.62	0.667956	0.197333	3.38492	0.000711995	0.00433526	Upregulated	HW_vs_CW	obesity_upregulated
E2f1	Plekha2	TRUE	3	transfac_pro__M08875	4.03	r80__500bp_up_and_100bp_down_tss.mc9nr.feather	w0.005	0.9	0.0107399	3028.16	0.743848	0.213475	3.48447	0.00049312	0.00317984	Upregulated	HW_vs_CW	obesity_upregulated
E2f1	Plekho2	TRUE	10	transfac_pro__M08875	4.03	r80__500bp_up_and_100bp_down_tss.mc9nr.feather	w0.005	1	0.00659597	4914.12	0.849224	0.268044	3.16822	0.00153375	0.00821998	Upregulated	HW_vs_CW	obesity_upregulated
E2f1	Ppil1	TRUE	12	transfac_pro__M08875	4.03	r80__500bp_up_and_100bp_down_tss.mc9nr.feather	w0.005	0.7	0.00648028	671.757	0.790573	0.176106	4.48918	7.14991e-06	8.71777e-05	Upregulated	HW_vs_CW	obesity_upregulated
E2f1	Prdm1	TRUE	9	transfac_pro__M08875	4.03	r80__500bp_up_and_100bp_down_tss.mc9nr.feather	w0.005	1	0.00838425	201.886	0.922945	0.369086	2.50062	0.0123975	0.0445902	Upregulated	HW_vs_CW	obesity_upregulated
E2f1	Psrc1	TRUE	10	transfac_pro__M08875	4.03	r80__500bp_up_and_100bp_down_tss.mc9nr.feather	w0.005	0.9	0.00606132	40.6828	1.92564	0.483497	3.98274	6.81247e-05	0.000601596	Upregulated	HW_vs_CW	obesity_upregulated
E2f1	Rab29	TRUE	1	transfac_pro__M08875	4.03	r80__500bp_up_and_100bp_down_tss.mc9nr.feather	w0.005	1	0.00546364	1381.59	1.13646	0.221568	5.12917	2.91019e-07	5.23834e-06	Upregulated	HW_vs_CW	obesity_upregulated
E2f1	Rasa1	TRUE	10	transfac_pro__M08875	4.03	r80__500bp_up_and_100bp_down_tss.mc9nr.feather	w0.005	1	0.0130581	3987.51	0.555405	0.181417	3.06148	0.00220248	0.0110505	Upregulated	HW_vs_CW	obesity_upregulated
E2f1	Rfc5	TRUE	7	transfac_pro__M08875	4.03	r80__500bp_up_and_100bp_down_tss.mc9nr.feather	w0.005	0.9	0.00502736	445.425	0.755949	0.230033	3.28627	0.00101525	0.0058351	Upregulated	HW_vs_CW	obesity_upregulated
E2f1	Sass6	TRUE	11	transfac_pro__M08875	4.03	r80__500bp_up_and_100bp_down_tss.mc9nr.feather	w0.005	0.9	0.00640328	126.123	0.842363	0.27384	3.07612	0.00209716	0.0106084	Upregulated	HW_vs_CW	obesity_upregulated
E2f1	Sh3bgrl	TRUE	10	transfac_pro__M08875	4.03	r80__500bp_up_and_100bp_down_tss.mc9nr.feather	w0.005	0.9	0.0147395	17267.4	0.780469	0.147989	5.27383	1.33607e-07	2.66511e-06	Upregulated	HW_vs_CW	obesity_upregulated
E2f1	Slf1	TRUE	9	transfac_pro__M08875	4.03	r80__500bp_up_and_100bp_down_tss.mc9nr.feather	w0.005	0.5	0.00832666	856.695	0.658352	0.151504	4.34545	1.3899e-05	0.000154392	Upregulated	HW_vs_CW	obesity_upregulated
E2f1	Tll1	TRUE	8	transfac_pro__M08875	4.03	r80__500bp_up_and_100bp_down_tss.mc9nr.feather	w0.005	0.6	0.00690584	350.625	1.11597	0.151474	7.36739	1.74004e-13	1.20027e-11	Upregulated	HW_vs_CW	obesity_upregulated
E2f1	Txndc16	TRUE	8	transfac_pro__M08875	4.03	r80__500bp_up_and_100bp_down_tss.mc9nr.feather	w0.005	0.8	0.00648304	2878.56	0.512652	0.126209	4.06193	4.86693e-05	0.000449928	Upregulated	HW_vs_CW	obesity_upregulated
E2f1	Ubtd2	TRUE	5	transfac_pro__M08875	4.03	r80__500bp_up_and_100bp_down_tss.mc9nr.feather	w0.005	0.9	0.00898281	466.977	0.51541	0.190371	2.7074	0.00678126	0.0275043	Upregulated	HW_vs_CW	obesity_upregulated
E2f1	Wdr44	TRUE	1	transfac_pro__M08875	4.03	r80__500bp_up_and_100bp_down_tss.mc9nr.feather	w0.005	0.3	0.00803701	1028.27	0.522749	0.148366	3.52338	0.000426072	0.00281782	Upregulated	HW_vs_CW	obesity_upregulated
E2f1	Wdr86	TRUE	7	transfac_pro__M08875	4.03	r80__500bp_up_and_100bp_down_tss.mc9nr.feather	w0.005	0.6	0.00783499	135.244	0.836306	0.301817	2.7709	0.00559011	0.0235846	Upregulated	HW_vs_CW	obesity_upregulated
E2f1	Xkr6	TRUE	8	transfac_pro__M08875	4.03	r80__500bp_up_and_100bp_down_tss.mc9nr.feather	w0.005	0.9	0.00583166	157.341	1.08628	0.404876	2.68301	0.00729637	0.0291618	Upregulated	HW_vs_CW	obesity_upregulated
E2f1	Zeb2	TRUE	9	transfac_pro__M08875	4.03	r80__500bp_up_and_100bp_down_tss.mc9nr.feather	w0.005	1	0.00638435	13623.4	0.849766	0.225525	3.76795	0.000164592	0.00127938	Upregulated	HW_vs_CW	obesity_upregulated
E2f1	Zfp710	TRUE	8	transfac_pro__M08875	4.03	r80__500bp_up_and_100bp_down_tss.mc9nr.feather	w0.005	1	0.00716874	1785.98	0.835706	0.193942	4.30906	1.63948e-05	0.000177575	Upregulated	HW_vs_CW	obesity_upregulated
E2f1	Pip4k2a	TRUE	4	transfac_pro__M07206	3.83	r80__500bp_up_and_100bp_down_tss.mc9nr.feather	top1sd	0.8	0.0122159	2852.07	0.986032	0.205397	4.80061	1.58186e-06	2.2976e-05	Upregulated	HW_vs_CW	obesity_upregulated
E2f1	Vat1	TRUE	5	transfac_pro__M07206	3.83	r80__500bp_up_and_100bp_down_tss.mc9nr.feather	top1sd	0.9	0.0132082	13594.2	0.757924	0.204368	3.70863	0.000208386	0.00156432	Upregulated	HW_vs_CW	obesity_upregulated
E2f1	Adamts7	TRUE	4	dbcorrdb__HA-E2F1__ENCSR000EWX_1__m1	3.76	r80__500bp_up_and_100bp_down_tss.mc9nr.feather	top50perTarget	1	0.011952	664.221	0.746782	0.24518	3.04586	0.00232018	0.0115238	Upregulated	HW_vs_CW	obesity_upregulated
E2f1	Ap3m1	TRUE	1	dbcorrdb__HA-E2F1__ENCSR000EWX_1__m1	3.76	r80__500bp_up_and_100bp_down_tss.mc9nr.feather	top50perTarget	0.8	0.00913264	3886.89	0.68902	0.143594	4.79839	1.5995e-06	2.31851e-05	Upregulated	HW_vs_CW	obesity_upregulated
E2f1	Entpd7	TRUE	2	dbcorrdb__HA-E2F1__ENCSR000EWX_1__m1	3.76	r80__500bp_up_and_100bp_down_tss.mc9nr.feather	top50perTarget	0.9	0.0100515	544.7	0.871002	0.2599	3.3513	0.00080433	0.00480989	Upregulated	HW_vs_CW	obesity_upregulated
E2f1	Ephb3	TRUE	3	dbcorrdb__HA-E2F1__ENCSR000EWX_1__m1	3.76	r80__500bp_up_and_100bp_down_tss.mc9nr.feather	top50perTarget	1	0.00946933	362.888	0.723176	0.243728	2.96715	0.00300576	0.0142748	Upregulated	HW_vs_CW	obesity_upregulated
E2f1	Kif4	TRUE	7	dbcorrdb__HA-E2F1__ENCSR000EWX_1__m1	3.76	r80__500bp_up_and_100bp_down_tss.mc9nr.feather	top50perTarget	0.5	0.00732523	115.426	1.62476	0.346188	4.6933	2.68836e-06	3.69331e-05	Upregulated	HW_vs_CW	obesity_upregulated
E2f1	Map4k1	TRUE	2	dbcorrdb__HA-E2F1__ENCSR000EWX_1__m1	3.76	r80__500bp_up_and_100bp_down_tss.mc9nr.feather	top50perTarget	0.5	0.0106527	766.778	1.62653	0.364296	4.46486	8.01214e-06	9.60289e-05	Upregulated	HW_vs_CW	obesity_upregulated
E2f1	Melk	TRUE	4	dbcorrdb__HA-E2F1__ENCSR000EWX_1__m1	3.76	r80__500bp_up_and_100bp_down_tss.mc9nr.feather	top50perTarget	0.9	0.0112674	82.6372	1.82784	0.512892	3.56378	0.000365551	0.00248504	Upregulated	HW_vs_CW	obesity_upregulated
E2f1	Ndc80	TRUE	3	dbcorrdb__HA-E2F1__ENCSR000EWX_1__m1	3.76	r80__500bp_up_and_100bp_down_tss.mc9nr.feather	top50perTarget	0.9	0.0115112	103.341	2.29158	0.345387	6.63481	3.24926e-11	1.4977e-09	Upregulated	HW_vs_CW	obesity_upregulated
E2f1	Ndnf	TRUE	7	dbcorrdb__HA-E2F1__ENCSR000EWX_1__m1	3.76	r80__500bp_up_and_100bp_down_tss.mc9nr.feather	top50perTarget	0.9	0.0116787	242.884	1.55427	0.498104	3.12037	0.00180622	0.00937466	Upregulated	HW_vs_CW	obesity_upregulated
E2f1	Rnaseh2b	TRUE	5	dbcorrdb__HA-E2F1__ENCSR000EWX_1__m1	3.76	r80__500bp_up_and_100bp_down_tss.mc9nr.feather	top50perTarget	0.9	0.0118423	460.187	0.785362	0.192648	4.07666	4.56868e-05	0.000426959	Upregulated	HW_vs_CW	obesity_upregulated
E2f1	Sdccag8	TRUE	9	dbcorrdb__HA-E2F1__ENCSR000EWX_1__m1	3.76	r80__500bp_up_and_100bp_down_tss.mc9nr.feather	top50perTarget	0.5	0.00839015	1614.21	0.535701	0.153367	3.49294	0.000477726	0.0031053	Upregulated	HW_vs_CW	obesity_upregulated
E2f1	St8sia4	TRUE	3	dbcorrdb__HA-E2F1__ENCSR000EWX_1__m1	3.76	r80__500bp_up_and_100bp_down_tss.mc9nr.feather	top50perTarget	1	0.0143032	1970.79	0.863189	0.309812	2.78617	0.00533348	0.0226765	Upregulated	HW_vs_CW	obesity_upregulated
E2f1	E2f8	TRUE	5	swissregulon__hs__E2F1..5.p2	3.67	r80__500bp_up_and_100bp_down_tss.mc9nr.feather	w0.001	0.5	0.00181744	73.848	2.07947	0.501464	4.1468	3.37149e-05	0.000331278	Upregulated	HW_vs_CW	obesity_upregulated
E2f1	Mcm2	TRUE	5	swissregulon__hs__E2F1..5.p2	3.67	r80__500bp_up_and_100bp_down_tss.mc9nr.feather	w0.001	0.8	0.00336105	712.777	1.36966	0.315934	4.33526	1.45586e-05	0.000160454	Upregulated	HW_vs_CW	obesity_upregulated
E2f1	Mycn	TRUE	5	swissregulon__hs__E2F1..5.p2	3.67	r80__500bp_up_and_100bp_down_tss.mc9nr.feather	w0.001	0.5	0.00138762	73.1845	2.89365	0.717605	4.03237	5.52174e-05	0.000501302	Upregulated	HW_vs_CW	obesity_upregulated
E2f1	Paqr4	TRUE	3	swissregulon__hs__E2F1..5.p2	3.67	r80__500bp_up_and_100bp_down_tss.mc9nr.feather	w0.001	0.1	0.00391444	1808.67	0.959348	0.193565	4.95622	7.18793e-07	1.1445e-05	Upregulated	HW_vs_CW	obesity_upregulated
E2f1	Pde4b	TRUE	2	swissregulon__hs__E2F1..5.p2	3.67	r80__500bp_up_and_100bp_down_tss.mc9nr.feather	w0.001	0.3	0.00157125	2165.25	0.584982	0.191159	3.06018	0.00221205	0.0110872	Upregulated	HW_vs_CW	obesity_upregulated
E2f1	Uhrf1	TRUE	5	swissregulon__hs__E2F1..5.p2	3.67	r80__500bp_up_and_100bp_down_tss.mc9nr.feather	w0.001	0.7	0.00324951	363.147	1.68097	0.242581	6.92955	4.22175e-12	2.23289e-10	Upregulated	HW_vs_CW	obesity_upregulated
E2f1	2810032G03Rik	TRUE	6	cisbp__M6190	3.59	r80__500bp_up_and_100bp_down_tss.mc9nr.feather	w0.005	0.8	0.00577825	199.712	1.54833	0.486739	3.18102	0.00146756	0.00791041	Upregulated	HW_vs_CW	obesity_upregulated
E2f1	A230028O05Rik	TRUE	4	cisbp__M6190	3.59	r80__500bp_up_and_100bp_down_tss.mc9nr.feather	w0.005	0.7	0.0141237	37.0636	2.95247	0.629753	4.68831	2.75474e-06	3.77779e-05	Upregulated	HW_vs_CW	obesity_upregulated
E2f1	A930004D18Rik	TRUE	4	cisbp__M6190	3.59	r80__500bp_up_and_100bp_down_tss.mc9nr.feather	w0.005	0.8	0.00741564	223.496	1.15084	0.33295	3.4565	0.00054723	0.00347801	Upregulated	HW_vs_CW	obesity_upregulated
E2f1	Adamts10	TRUE	1	cisbp__M6190	3.59	r80__500bp_up_and_100bp_down_tss.mc9nr.feather	w0.005	0.6	0.0102779	3570.82	0.670718	0.212059	3.16288	0.00156216	0.00833152	Upregulated	HW_vs_CW	obesity_upregulated
E2f1	Adamts5	TRUE	6	cisbp__M6190	3.59	r80__500bp_up_and_100bp_down_tss.mc9nr.feather	w0.005	0.7	0.00658634	17605.4	1.27302	0.354458	3.59145	0.000328844	0.00227789	Upregulated	HW_vs_CW	obesity_upregulated
E2f1	Aldh3b1	TRUE	4	cisbp__M6190	3.59	r80__500bp_up_and_100bp_down_tss.mc9nr.feather	w0.005	1	0.00754454	1119.61	1.33103	0.307876	4.32325	1.5375e-05	0.00016851	Upregulated	HW_vs_CW	obesity_upregulated
E2f1	Ankrd42	TRUE	5	cisbp__M6190	3.59	r80__500bp_up_and_100bp_down_tss.mc9nr.feather	w0.005	0.7	0.00975895	360.522	0.818866	0.129157	6.34008	2.29651e-10	8.93601e-09	Upregulated	HW_vs_CW	obesity_upregulated
E2f1	Apbb1	TRUE	5	cisbp__M6190	3.59	r80__500bp_up_and_100bp_down_tss.mc9nr.feather	w0.005	0.5	0.00528439	901.812	0.729544	0.248084	2.94072	0.00327455	0.0153336	Upregulated	HW_vs_CW	obesity_upregulated
E2f1	Armcx1	TRUE	2	cisbp__M6190	3.59	r80__500bp_up_and_100bp_down_tss.mc9nr.feather	w0.005	0.7	0.00667803	1246.36	0.891892	0.184009	4.84699	1.25348e-06	1.88075e-05	Upregulated	HW_vs_CW	obesity_upregulated
E2f1	Armcx6	TRUE	4	cisbp__M6190	3.59	r80__500bp_up_and_100bp_down_tss.mc9nr.feather	w0.005	0.9	0.00588982	198.717	1.14338	0.404867	2.82409	0.00474157	0.0206494	Upregulated	HW_vs_CW	obesity_upregulated
E2f1	Aunip	TRUE	7	cisbp__M6190	3.59	r80__500bp_up_and_100bp_down_tss.mc9nr.feather	w0.005	0.8	0.0074477	18.5993	2.27001	0.830656	2.73279	0.00627996	0.025897	Upregulated	HW_vs_CW	obesity_upregulated
E2f1	BC028528	TRUE	5	cisbp__M6190	3.59	r80__500bp_up_and_100bp_down_tss.mc9nr.feather	w0.005	0.6	0.0081343	171.736	1.07699	0.19036	5.65768	1.53436e-08	3.83163e-07	Upregulated	HW_vs_CW	obesity_upregulated
E2f1	Btbd3	TRUE	5	cisbp__M6190	3.59	r80__500bp_up_and_100bp_down_tss.mc9nr.feather	w0.005	0.1	0.00686674	2638.04	0.535906	0.119747	4.47532	7.62962e-06	9.22286e-05	Upregulated	HW_vs_CW	obesity_upregulated
E2f1	C1qtnf6	TRUE	7	cisbp__M6190	3.59	r80__500bp_up_and_100bp_down_tss.mc9nr.feather	w0.005	0.7	0.00712907	1308.23	0.977551	0.301977	3.23717	0.00120722	0.00674295	Upregulated	HW_vs_CW	obesity_upregulated
E2f1	C1qtnf7	TRUE	4	cisbp__M6190	3.59	r80__500bp_up_and_100bp_down_tss.mc9nr.feather	w0.005	0.8	0.00809422	577.669	0.622636	0.245782	2.53329	0.0112998	0.0413432	Upregulated	HW_vs_CW	obesity_upregulated
E2f1	Cacna1a	TRUE	7	cisbp__M6190	3.59	r80__500bp_up_and_100bp_down_tss.mc9nr.feather	w0.005	1	0.00935776	495.643	0.820367	0.227089	3.61253	0.000303224	0.0021258	Upregulated	HW_vs_CW	obesity_upregulated
E2f1	Calm1	TRUE	5	cisbp__M6190	3.59	r80__500bp_up_and_100bp_down_tss.mc9nr.feather	w0.005	0.3	0.00636115	31601.6	0.676199	0.0907191	7.45377	9.07117e-14	6.628e-12	Upregulated	HW_vs_CW	obesity_upregulated
E2f1	Cbx8	TRUE	6	cisbp__M6190	3.59	r80__500bp_up_and_100bp_down_tss.mc9nr.feather	w0.005	0.9	0.00623053	562.435	1.02953	0.229616	4.48372	7.33527e-06	8.91073e-05	Upregulated	HW_vs_CW	obesity_upregulated
E2f1	Ccdc85b	TRUE	3	cisbp__M6190	3.59	r80__500bp_up_and_100bp_down_tss.mc9nr.feather	w0.005	0.9	0.0106883	2504.01	0.542991	0.150252	3.61387	0.000301661	0.00211753	Upregulated	HW_vs_CW	obesity_upregulated
E2f1	Ccl22	TRUE	9	cisbp__M6190	3.59	r80__500bp_up_and_100bp_down_tss.mc9nr.feather	w0.005	0.5	0.0214145	152.622	1.4986	0.538986	2.78041	0.00542903	0.0230133	Upregulated	HW_vs_CW	obesity_upregulated
E2f1	Cd247	TRUE	2	cisbp__M6190	3.59	r80__500bp_up_and_100bp_down_tss.mc9nr.feather	w0.005	0.9	0.00642798	237.328	1.62951	0.276122	5.9014	3.60432e-09	1.05499e-07	Upregulated	HW_vs_CW	obesity_upregulated
E2f1	Cd34	TRUE	5	cisbp__M6190	3.59	r80__500bp_up_and_100bp_down_tss.mc9nr.feather	w0.005	0.3	0.00590467	9889.45	0.568184	0.205691	2.76232	0.00573927	0.0240698	Upregulated	HW_vs_CW	obesity_upregulated
E2f1	Cdc45	TRUE	6	cisbp__M6190	3.59	r80__500bp_up_and_100bp_down_tss.mc9nr.feather	w0.005	0.7	0.00768816	398.427	0.75453	0.134934	5.59183	2.24687e-08	5.41886e-07	Upregulated	HW_vs_CW	obesity_upregulated
E2f1	Cela1	TRUE	1	cisbp__M6190	3.59	r80__500bp_up_and_100bp_down_tss.mc9nr.feather	w0.005	0.9	0.0128205	1296.06	1.25432	0.373431	3.3589	0.00078254	0.00469953	Upregulated	HW_vs_CW	obesity_upregulated
E2f1	Cenpp	TRUE	5	cisbp__M6190	3.59	r80__500bp_up_and_100bp_down_tss.mc9nr.feather	w0.005	0.8	0.00732788	70.3691	1.35612	0.276612	4.9026	9.45743e-07	1.46013e-05	Upregulated	HW_vs_CW	obesity_upregulated
E2f1	Ckap2l	TRUE	6	cisbp__M6190	3.59	r80__500bp_up_and_100bp_down_tss.mc9nr.feather	w0.005	0.6	0.00743536	145.821	1.84973	0.279262	6.62365	3.50447e-11	1.58934e-09	Upregulated	HW_vs_CW	obesity_upregulated
E2f1	Cntn2	TRUE	1	cisbp__M6190	3.59	r80__500bp_up_and_100bp_down_tss.mc9nr.feather	w0.005	0.718185	0.011956	57.5428	2.002	0.422712	4.73609	2.17879e-06	3.06585e-05	Upregulated	HW_vs_CW	obesity_upregulated
E2f1	Cotl1	TRUE	2	cisbp__M6190	3.59	r80__500bp_up_and_100bp_down_tss.mc9nr.feather	w0.005	0.8	0.0112238	5674.64	1.38865	0.295087	4.70591	2.5274e-06	3.49898e-05	Upregulated	HW_vs_CW	obesity_upregulated
E2f1	Cxcl10	TRUE	5	cisbp__M6190	3.59	r80__500bp_up_and_100bp_down_tss.mc9nr.feather	w0.005	1	0.0056335	209.935	0.880256	0.213504	4.1229	3.74133e-05	0.00036102	Upregulated	HW_vs_CW	obesity_upregulated
E2f1	Cyb5r1	TRUE	1	cisbp__M6190	3.59	r80__500bp_up_and_100bp_down_tss.mc9nr.feather	w0.005	0.4	0.0053865	3076.77	0.522965	0.166129	3.14794	0.00164424	0.00868049	Upregulated	HW_vs_CW	obesity_upregulated
E2f1	Cyp4v3	TRUE	7	cisbp__M6190	3.59	r80__500bp_up_and_100bp_down_tss.mc9nr.feather	w0.005	1	0.00780682	7986.8	1.34397	0.261595	5.13761	2.78261e-07	5.04089e-06	Upregulated	HW_vs_CW	obesity_upregulated
E2f1	Degs1	TRUE	4	cisbp__M6190	3.59	r80__500bp_up_and_100bp_down_tss.mc9nr.feather	w0.005	0.9	0.00845629	10396.6	1.02058	0.171194	5.96155	2.49859e-09	7.4912e-08	Upregulated	HW_vs_CW	obesity_upregulated
E2f1	Deptor	TRUE	6	cisbp__M6190	3.59	r80__500bp_up_and_100bp_down_tss.mc9nr.feather	w0.005	0.9	0.00993974	14284.1	1.10761	0.231128	4.79221	1.64955e-06	2.38405e-05	Upregulated	HW_vs_CW	obesity_upregulated
E2f1	Dgkz	TRUE	7	cisbp__M6190	3.59	r80__500bp_up_and_100bp_down_tss.mc9nr.feather	w0.005	0.9	0.00887282	4729.48	0.66467	0.160071	4.15236	3.29071e-05	0.000325083	Upregulated	HW_vs_CW	obesity_upregulated
E2f1	Dhrs9	TRUE	1	cisbp__M6190	3.59	r80__500bp_up_and_100bp_down_tss.mc9nr.feather	w0.005	0.5	0.00516214	798.643	1.61076	0.545063	2.95518	0.00312482	0.0147692	Upregulated	HW_vs_CW	obesity_upregulated
E2f1	Dnmt3a	TRUE	4	cisbp__M6190	3.59	r80__500bp_up_and_100bp_down_tss.mc9nr.feather	w0.005	1	0.0117334	4380.17	0.979231	0.133088	7.35779	1.86981e-13	1.27169e-11	Upregulated	HW_vs_CW	obesity_upregulated
E2f1	E130310I04Rik	TRUE	4	cisbp__M6190	3.59	r80__500bp_up_and_100bp_down_tss.mc9nr.feather	w0.005	0.7	0.0121314	63.3536	1.87139	0.457059	4.09441	4.23248e-05	0.000401392	Upregulated	HW_vs_CW	obesity_upregulated
E2f1	Edem1	TRUE	6	cisbp__M6190	3.59	r80__500bp_up_and_100bp_down_tss.mc9nr.feather	w0.005	0.7	0.0057265	11856.9	0.774151	0.187736	4.12361	3.72975e-05	0.000360159	Upregulated	HW_vs_CW	obesity_upregulated
E2f1	Elmo1	TRUE	6	cisbp__M6190	3.59	r80__500bp_up_and_100bp_down_tss.mc9nr.feather	w0.005	0.9	0.00706731	1983.04	0.702025	0.103273	6.79774	1.06275e-11	5.33482e-10	Upregulated	HW_vs_CW	obesity_upregulated
E2f1	Emp3	TRUE	7	cisbp__M6190	3.59	r80__500bp_up_and_100bp_down_tss.mc9nr.feather	w0.005	0.9	0.00710349	3174.87	1.21619	0.278292	4.37021	1.24129e-05	0.000139059	Upregulated	HW_vs_CW	obesity_upregulated
E2f1	Enkd1	TRUE	7	cisbp__M6190	3.59	r80__500bp_up_and_100bp_down_tss.mc9nr.feather	w0.005	0.6	0.00642634	117.44	0.756489	0.283554	2.66788	0.00763315	0.0302444	Upregulated	HW_vs_CW	obesity_upregulated
E2f1	Ephb1	TRUE	3	cisbp__M6190	3.59	r80__500bp_up_and_100bp_down_tss.mc9nr.feather	w0.005	0.1	0.0057526	210.709	1.50339	0.342366	4.39118	1.12737e-05	0.000128337	Upregulated	HW_vs_CW	obesity_upregulated
E2f1	Eva1b	TRUE	5	cisbp__M6190	3.59	r80__500bp_up_and_100bp_down_tss.mc9nr.feather	w0.005	0.9	0.00545233	962.463	0.702912	0.253565	2.77212	0.00556925	0.0235016	Upregulated	HW_vs_CW	obesity_upregulated
E2f1	Fat3	TRUE	1	cisbp__M6190	3.59	r80__500bp_up_and_100bp_down_tss.mc9nr.feather	w0.005	0.9	0.00905974	125.399	4.58123	0.84515	5.42061	5.93958e-08	1.30486e-06	Upregulated	HW_vs_CW	obesity_upregulated
E2f1	Fbxl15	TRUE	5	cisbp__M6190	3.59	r80__500bp_up_and_100bp_down_tss.mc9nr.feather	w0.005	0.7	0.00609774	227.392	0.629641	0.200568	3.13929	0.00169358	0.00888119	Upregulated	HW_vs_CW	obesity_upregulated
E2f1	Fkbp1b	TRUE	7	cisbp__M6190	3.59	r80__500bp_up_and_100bp_down_tss.mc9nr.feather	w0.005	0.8	0.00705799	178.494	1.40336	0.31972	4.38934	1.13697e-05	0.000129206	Upregulated	HW_vs_CW	obesity_upregulated
E2f1	Gab1	TRUE	6	cisbp__M6190	3.59	r80__500bp_up_and_100bp_down_tss.mc9nr.feather	w0.005	0.9	0.00821689	2547.59	0.502201	0.154917	3.24175	0.00118798	0.00664866	Upregulated	HW_vs_CW	obesity_upregulated
E2f1	Gmppb	TRUE	5	cisbp__M6190	3.59	r80__500bp_up_and_100bp_down_tss.mc9nr.feather	w0.005	0.8	0.00529464	715.261	0.868647	0.176318	4.9266	8.36741e-07	1.31218e-05	Upregulated	HW_vs_CW	obesity_upregulated
E2f1	Gpr137b	TRUE	4	cisbp__M6190	3.59	r80__500bp_up_and_100bp_down_tss.mc9nr.feather	w0.005	1	0.0109368	2276.13	0.669642	0.262614	2.54992	0.0107749	0.0398738	Upregulated	HW_vs_CW	obesity_upregulated
E2f1	Hmga2-ps1	TRUE	7	cisbp__M6190	3.59	r80__500bp_up_and_100bp_down_tss.mc9nr.feather	w0.005	0.6	0.00529883	469.248	1.1753	0.333216	3.52714	0.000420073	0.00278727	Upregulated	HW_vs_CW	obesity_upregulated
E2f1	Hspa12a	TRUE	2	cisbp__M6190	3.59	r80__500bp_up_and_100bp_down_tss.mc9nr.feather	w0.005	0.3	0.00811601	6407.3	1.47896	0.243479	6.07428	1.24547e-09	4.04124e-08	Upregulated	HW_vs_CW	obesity_upregulated
E2f1	Itga5	TRUE	2	cisbp__M6190	3.59	r80__500bp_up_and_100bp_down_tss.mc9nr.feather	w0.005	0.6	0.00561728	4072.98	0.571801	0.139865	4.08823	4.34674e-05	0.000409711	Upregulated	HW_vs_CW	obesity_upregulated
E2f1	Kcnk13	TRUE	3	cisbp__M6190	3.59	r80__500bp_up_and_100bp_down_tss.mc9nr.feather	w0.005	0.7	0.00592818	277.473	0.757901	0.233535	3.24535	0.00117308	0.00658208	Upregulated	HW_vs_CW	obesity_upregulated
E2f1	Kif21b	TRUE	9	cisbp__M6190	3.59	r80__500bp_up_and_100bp_down_tss.mc9nr.feather	w0.005	0.9	0.00620106	1311.02	1.33758	0.313807	4.26244	2.02208e-05	0.00021321	Upregulated	HW_vs_CW	obesity_upregulated
E2f1	Klf8	TRUE	6	cisbp__M6190	3.59	r80__500bp_up_and_100bp_down_tss.mc9nr.feather	w0.005	1	0.00882634	253.392	0.906186	0.278283	3.25634	0.00112858	0.00637552	Upregulated	HW_vs_CW	obesity_upregulated
E2f1	Laptm5	TRUE	3	cisbp__M6190	3.59	r80__500bp_up_and_100bp_down_tss.mc9nr.feather	w0.005	0.8	0.00618369	10489.9	0.964391	0.311028	3.10065	0.00193095	0.00989965	Upregulated	HW_vs_CW	obesity_upregulated
E2f1	Large1	TRUE	13	cisbp__M6190	3.59	r80__500bp_up_and_100bp_down_tss.mc9nr.feather	w0.005	0.6	0.0158439	2411.91	0.722118	0.166546	4.33584	1.45204e-05	0.000160122	Upregulated	HW_vs_CW	obesity_upregulated
E2f1	Loxl1	TRUE	2	cisbp__M6190	3.59	r80__500bp_up_and_100bp_down_tss.mc9nr.feather	w0.005	0.6	0.00958108	5247.12	0.873783	0.211809	4.12534	3.70185e-05	0.000358166	Upregulated	HW_vs_CW	obesity_upregulated
E2f1	Ltc4s	TRUE	5	cisbp__M6190	3.59	r80__500bp_up_and_100bp_down_tss.mc9nr.feather	w0.005	0.7	0.0069541	1927.8	0.720861	0.265984	2.71017	0.00672488	0.0273261	Upregulated	HW_vs_CW	obesity_upregulated
E2f1	Lyn	TRUE	4	cisbp__M6190	3.59	r80__500bp_up_and_100bp_down_tss.mc9nr.feather	w0.005	0.9	0.00856602	4140.66	0.804393	0.19994	4.02317	5.74193e-05	0.000518429	Upregulated	HW_vs_CW	obesity_upregulated
E2f1	Mad2l1	TRUE	8	cisbp__M6190	3.59	r80__500bp_up_and_100bp_down_tss.mc9nr.feather	w0.005	1	0.0107614	438.871	0.605625	0.181243	3.34151	0.000833239	0.0049456	Upregulated	HW_vs_CW	obesity_upregulated
E2f1	Map1a	TRUE	7	cisbp__M6190	3.59	r80__500bp_up_and_100bp_down_tss.mc9nr.feather	w0.005	0.7	0.00745189	2565.9	1.3828	0.292883	4.72135	2.34283e-06	3.26177e-05	Upregulated	HW_vs_CW	obesity_upregulated
E2f1	Mapre2	TRUE	6	cisbp__M6190	3.59	r80__500bp_up_and_100bp_down_tss.mc9nr.feather	w0.005	0.8	0.0063552	6327.64	0.648796	0.146869	4.41752	9.98404e-06	0.000115726	Upregulated	HW_vs_CW	obesity_upregulated
E2f1	Mdp1	TRUE	4	cisbp__M6190	3.59	r80__500bp_up_and_100bp_down_tss.mc9nr.feather	w0.005	0.9	0.00918991	1781.67	0.506132	0.107829	4.69385	2.68107e-06	3.68586e-05	Upregulated	HW_vs_CW	obesity_upregulated
E2f1	Meis3	TRUE	3	cisbp__M6190	3.59	r80__500bp_up_and_100bp_down_tss.mc9nr.feather	w0.005	1	0.00595693	654.421	0.585081	0.203845	2.87022	0.00410187	0.0184117	Upregulated	HW_vs_CW	obesity_upregulated
E2f1	Mest	TRUE	5	cisbp__M6190	3.59	r80__500bp_up_and_100bp_down_tss.mc9nr.feather	w0.005	0.9	0.00543891	20384.4	3.65543	0.703545	5.19573	2.03914e-07	3.84958e-06	Upregulated	HW_vs_CW	obesity_upregulated
E2f1	Metrn	TRUE	7	cisbp__M6190	3.59	r80__500bp_up_and_100bp_down_tss.mc9nr.feather	w0.005	0.5	0.005228	497.243	1.91338	0.229684	8.33049	8.05065e-17	9.62564e-15	Upregulated	HW_vs_CW	obesity_upregulated
E2f1	Mettl24	TRUE	3	cisbp__M6190	3.59	r80__500bp_up_and_100bp_down_tss.mc9nr.feather	w0.005	0.2	0.014391	160.487	1.54109	0.266405	5.78475	7.26216e-09	1.95721e-07	Upregulated	HW_vs_CW	obesity_upregulated
E2f1	Mmp19	TRUE	1	cisbp__M6190	3.59	r80__500bp_up_and_100bp_down_tss.mc9nr.feather	w0.005	0.9	0.00794511	3393.83	1.08245	0.184311	5.87297	4.28055e-09	1.22742e-07	Upregulated	HW_vs_CW	obesity_upregulated
E2f1	Ocstamp	TRUE	6	cisbp__M6190	3.59	r80__500bp_up_and_100bp_down_tss.mc9nr.feather	w0.005	0.8	0.0117515	43.304	1.52537	0.555377	2.74654	0.00602272	0.0250456	Upregulated	HW_vs_CW	obesity_upregulated
E2f1	Pfn1	TRUE	12	cisbp__M6190	3.59	r80__500bp_up_and_100bp_down_tss.mc9nr.feather	w0.005	1	0.0095656	14605.4	0.754195	0.180833	4.17068	3.03695e-05	0.000302896	Upregulated	HW_vs_CW	obesity_upregulated
E2f1	Pianp	TRUE	5	cisbp__M6190	3.59	r80__500bp_up_and_100bp_down_tss.mc9nr.feather	w0.005	0.9	0.00523401	532.126	2.42388	0.454612	5.33175	9.72715e-08	2.02423e-06	Upregulated	HW_vs_CW	obesity_upregulated
E2f1	Plxdc1	TRUE	7	cisbp__M6190	3.59	r80__500bp_up_and_100bp_down_tss.mc9nr.feather	w0.005	0.9	0.00780677	367.248	1.33472	0.40392	3.3044	0.000951787	0.005534	Upregulated	HW_vs_CW	obesity_upregulated
E2f1	Pou2f2	TRUE	2	cisbp__M6190	3.59	r80__500bp_up_and_100bp_down_tss.mc9nr.feather	w0.005	0.8	0.0134941	189.171	0.830154	0.322703	2.57251	0.0100965	0.0379034	Upregulated	HW_vs_CW	obesity_upregulated
E2f1	Prcp	TRUE	6	cisbp__M6190	3.59	r80__500bp_up_and_100bp_down_tss.mc9nr.feather	w0.005	0.8	0.0202287	4204.09	0.586487	0.225114	2.60529	0.00917976	0.0351509	Upregulated	HW_vs_CW	obesity_upregulated
E2f1	Prelp	TRUE	2	cisbp__M6190	3.59	r80__500bp_up_and_100bp_down_tss.mc9nr.feather	w0.005	0.7	0.00980768	57388.1	1.69044	0.340817	4.95997	7.05055e-07	1.129e-05	Upregulated	HW_vs_CW	obesity_upregulated
E2f1	Psd2	TRUE	4	cisbp__M6190	3.59	r80__500bp_up_and_100bp_down_tss.mc9nr.feather	w0.005	0.6	0.0060136	36.4333	1.00502	0.349989	2.87157	0.00408444	0.0183507	Upregulated	HW_vs_CW	obesity_upregulated
E2f1	Rai2	TRUE	3	cisbp__M6190	3.59	r80__500bp_up_and_100bp_down_tss.mc9nr.feather	w0.005	0.3	0.0110989	1105.7	0.547531	0.193132	2.83502	0.00458232	0.02008	Upregulated	HW_vs_CW	obesity_upregulated
E2f1	Rap2b	TRUE	6	cisbp__M6190	3.59	r80__500bp_up_and_100bp_down_tss.mc9nr.feather	w0.005	1	0.007623	784.613	0.833447	0.230431	3.61691	0.000298143	0.00209913	Upregulated	HW_vs_CW	obesity_upregulated
E2f1	Rara	TRUE	7	cisbp__M6190	3.59	r80__500bp_up_and_100bp_down_tss.mc9nr.feather	w0.005	0.9	0.00520389	1347.23	0.580577	0.13658	4.25084	2.12972e-05	0.00022301	Upregulated	HW_vs_CW	obesity_upregulated
E2f1	Rbm28	TRUE	4	cisbp__M6190	3.59	r80__500bp_up_and_100bp_down_tss.mc9nr.feather	w0.005	0.6	0.00810376	4467.64	1.21856	0.148476	8.20713	2.26531e-16	2.51067e-14	Upregulated	HW_vs_CW	obesity_upregulated
E2f1	Rcor2	TRUE	5	cisbp__M6190	3.59	r80__500bp_up_and_100bp_down_tss.mc9nr.feather	w0.005	0.8	0.00781271	293.199	1.60355	0.327373	4.89823	9.67032e-07	1.48928e-05	Upregulated	HW_vs_CW	obesity_upregulated
E2f1	Rnf122	TRUE	6	cisbp__M6190	3.59	r80__500bp_up_and_100bp_down_tss.mc9nr.feather	w0.005	0.7	0.006769	751.538	1.42881	0.431856	3.30854	0.000937823	0.0054754	Upregulated	HW_vs_CW	obesity_upregulated
E2f1	Runx1	TRUE	2	cisbp__M6190	3.59	r80__500bp_up_and_100bp_down_tss.mc9nr.feather	w0.005	0.8	0.00563633	768.113	0.784226	0.274445	2.8575	0.00426994	0.0189892	Upregulated	HW_vs_CW	obesity_upregulated
E2f1	Sbk1	TRUE	8	cisbp__M6190	3.59	r80__500bp_up_and_100bp_down_tss.mc9nr.feather	w0.005	0.8	0.00811743	1766.55	0.719553	0.184281	3.90466	9.43586e-05	0.00079756	Upregulated	HW_vs_CW	obesity_upregulated
E2f1	Scarf2	TRUE	4	cisbp__M6190	3.59	r80__500bp_up_and_100bp_down_tss.mc9nr.feather	w0.005	0.9	0.00893907	1258.03	0.512553	0.161334	3.17697	0.00148822	0.00800642	Upregulated	HW_vs_CW	obesity_upregulated
E2f1	Sh3bgrl3	TRUE	1	cisbp__M6190	3.59	r80__500bp_up_and_100bp_down_tss.mc9nr.feather	w0.005	0.9	0.0184943	4870.97	1.29398	0.263951	4.90234	9.47025e-07	1.46074e-05	Upregulated	HW_vs_CW	obesity_upregulated
E2f1	Slc15a3	TRUE	3	cisbp__M6190	3.59	r80__500bp_up_and_100bp_down_tss.mc9nr.feather	w0.005	0.8	0.0102752	1327.96	1.69717	0.317338	5.34815	8.88556e-08	1.86935e-06	Upregulated	HW_vs_CW	obesity_upregulated
E2f1	Sncaip	TRUE	6	cisbp__M6190	3.59	r80__500bp_up_and_100bp_down_tss.mc9nr.feather	w0.005	0.2	0.00608796	832.421	0.750097	0.179118	4.18773	2.8176e-05	0.00028418	Upregulated	HW_vs_CW	obesity_upregulated
E2f1	Sod3	TRUE	1	cisbp__M6190	3.59	r80__500bp_up_and_100bp_down_tss.mc9nr.feather	w0.005	1	0.00808805	36861.7	0.847803	0.23767	3.56715	0.000360884	0.00246094	Upregulated	HW_vs_CW	obesity_upregulated
E2f1	Specc1	TRUE	2	cisbp__M6190	3.59	r80__500bp_up_and_100bp_down_tss.mc9nr.feather	w0.005	0.9	0.0118742	1543.38	1.32431	0.288187	4.59532	4.32084e-06	5.58729e-05	Upregulated	HW_vs_CW	obesity_upregulated
E2f1	Stim2	TRUE	5	cisbp__M6190	3.59	r80__500bp_up_and_100bp_down_tss.mc9nr.feather	w0.005	0.6	0.00602105	3058.56	0.677971	0.131838	5.14246	2.7117e-07	4.93055e-06	Upregulated	HW_vs_CW	obesity_upregulated
E2f1	Tekt2	TRUE	6	cisbp__M6190	3.59	r80__500bp_up_and_100bp_down_tss.mc9nr.feather	w0.005	0.9	0.00577925	116.027	0.633503	0.232744	2.72189	0.00649091	0.0265284	Upregulated	HW_vs_CW	obesity_upregulated
E2f1	Tfrc	TRUE	5	cisbp__M6190	3.59	r80__500bp_up_and_100bp_down_tss.mc9nr.feather	w0.005	0.1	0.00628292	1648.94	1.09203	0.208921	5.22701	1.72275e-07	3.31899e-06	Upregulated	HW_vs_CW	obesity_upregulated
E2f1	Tmem263	TRUE	4	cisbp__M6190	3.59	r80__500bp_up_and_100bp_down_tss.mc9nr.feather	w0.005	0.8	0.00591793	1415.68	0.627727	0.117816	5.32804	9.92789e-08	2.05567e-06	Upregulated	HW_vs_CW	obesity_upregulated
E2f1	Tomt	TRUE	3	cisbp__M6190	3.59	r80__500bp_up_and_100bp_down_tss.mc9nr.feather	w0.005	0.5	0.0107452	26.0707	1.16819	0.372882	3.13288	0.00173102	0.00904863	Upregulated	HW_vs_CW	obesity_upregulated
E2f1	Triqk	TRUE	4	cisbp__M6190	3.59	r80__500bp_up_and_100bp_down_tss.mc9nr.feather	w0.005	0.9	0.0117481	332.95	0.624815	0.165297	3.77995	0.000156857	0.00122992	Upregulated	HW_vs_CW	obesity_upregulated
E2f1	Trpc3	TRUE	5	cisbp__M6190	3.59	r80__500bp_up_and_100bp_down_tss.mc9nr.feather	w0.005	0.9	0.00710196	285.913	0.85744	0.221565	3.86993	0.000108867	0.000902029	Upregulated	HW_vs_CW	obesity_upregulated
E2f1	Tuba1a	TRUE	2	cisbp__M6190	3.59	r80__500bp_up_and_100bp_down_tss.mc9nr.feather	w0.005	0.3	0.0121427	13739.1	1.6504	0.271362	6.08189	1.18771e-09	3.87293e-08	Upregulated	HW_vs_CW	obesity_upregulated
E2f1	Vav1	TRUE	3	cisbp__M6190	3.59	r80__500bp_up_and_100bp_down_tss.mc9nr.feather	w0.005	0.8	0.0209762	782.408	1.01119	0.314019	3.22016	0.00128118	0.00708383	Upregulated	HW_vs_CW	obesity_upregulated
E2f1	Zc3h12d	TRUE	4	cisbp__M6190	3.59	r80__500bp_up_and_100bp_down_tss.mc9nr.feather	w0.005	1	0.0163132	116.303	1.64745	0.5356	3.0759	0.00209869	0.0106134	Upregulated	HW_vs_CW	obesity_upregulated
E2f1	Zfp414	TRUE	6	cisbp__M6190	3.59	r80__500bp_up_and_100bp_down_tss.mc9nr.feather	w0.005	0.9	0.00534185	535.163	0.533888	0.180276	2.96151	0.00306136	0.0145075	Upregulated	HW_vs_CW	obesity_upregulated
E2f1	Znrf2	TRUE	6	cisbp__M6190	3.59	r80__500bp_up_and_100bp_down_tss.mc9nr.feather	w0.005	0.8	0.00501292	7516.85	0.604884	0.0979927	6.17275	6.71124e-10	2.2986e-08	Upregulated	HW_vs_CW	obesity_upregulated
E2f1	Vstm2b	TRUE	5	transfac_pro__M00430	3.56	r80__500bp_up_and_100bp_down_tss.mc9nr.feather	top10perTarget	0.9	0.0137654	119.251	2.04817	0.355662	5.75875	8.47405e-09	2.24397e-07	Upregulated	HW_vs_CW	obesity_upregulated
E2f1	Wfs1	TRUE	2	transfac_pro__M00430	3.56	r80__500bp_up_and_100bp_down_tss.mc9nr.feather	top10perTarget	1	0.015032	2889.69	1.25102	0.168876	7.40793	1.28284e-13	9.13641e-12	Upregulated	HW_vs_CW	obesity_upregulated
E2f1	Angptl3	TRUE	1	tfdimers__MD00236	3.55	r80__500bp_up_and_100bp_down_tss.mc9nr.feather	top50perTarget	0.9	0.0173254	254.598	0.89576	0.330872	2.70727	0.00678397	0.0275096	Upregulated	HW_vs_CW	obesity_upregulated
E2f1	Anxa1	TRUE	1	tfdimers__MD00236	3.55	r80__500bp_up_and_100bp_down_tss.mc9nr.feather	top50perTarget	0.7	0.0127407	23756.7	1.7762	0.295987	6.00093	1.9619e-09	6.02872e-08	Upregulated	HW_vs_CW	obesity_upregulated
E2f1	Arhgap22	TRUE	1	tfdimers__MD00236	3.55	r80__500bp_up_and_100bp_down_tss.mc9nr.feather	top50perTarget	0.9	0.0135632	203.037	0.608905	0.227747	2.6736	0.0075042	0.0298353	Upregulated	HW_vs_CW	obesity_upregulated
E2f1	Bcl2a1d	TRUE	2	tfdimers__MD00236	3.55	r80__500bp_up_and_100bp_down_tss.mc9nr.feather	top50perTarget	0.8	0.0099812	158.105	1.21751	0.368003	3.30842	0.000938257	0.00547631	Upregulated	HW_vs_CW	obesity_upregulated
E2f1	Bfsp1	TRUE	1	tfdimers__MD00236	3.55	r80__500bp_up_and_100bp_down_tss.mc9nr.feather	top50perTarget	0.8	0.0108215	115.627	1.01061	0.208786	4.84043	1.29561e-06	1.9363e-05	Upregulated	HW_vs_CW	obesity_upregulated
E2f1	Bst2	TRUE	2	tfdimers__MD00236	3.55	r80__500bp_up_and_100bp_down_tss.mc9nr.feather	top50perTarget	0.6	0.00923211	3426.96	0.56167	0.134535	4.17491	2.98105e-05	0.00029868	Upregulated	HW_vs_CW	obesity_upregulated
E2f1	Calcrl	TRUE	3	tfdimers__MD00236	3.55	r80__500bp_up_and_100bp_down_tss.mc9nr.feather	top50perTarget	0.8	0.013144	1688.68	0.644083	0.15821	4.07106	4.67997e-05	0.000434682	Upregulated	HW_vs_CW	obesity_upregulated
E2f1	Clec1a	TRUE	1	tfdimers__MD00236	3.55	r80__500bp_up_and_100bp_down_tss.mc9nr.feather	top50perTarget	0.3	0.0116585	1214.07	0.783616	0.190594	4.11144	3.93203e-05	0.000376924	Upregulated	HW_vs_CW	obesity_upregulated
E2f1	Col6a3	TRUE	2	tfdimers__MD00236	3.55	r80__500bp_up_and_100bp_down_tss.mc9nr.feather	top50perTarget	0.6	0.00666646	19561.8	1.01893	0.282161	3.61118	0.000304812	0.00213537	Upregulated	HW_vs_CW	obesity_upregulated
E2f1	Fyb	TRUE	1	tfdimers__MD00236	3.55	r80__500bp_up_and_100bp_down_tss.mc9nr.feather	top50perTarget	0.9	0.0100227	1117.77	1.06202	0.347638	3.05497	0.00225083	0.0112281	Upregulated	HW_vs_CW	obesity_upregulated
E2f1	Gzma	TRUE	1	tfdimers__MD00236	3.55	r80__500bp_up_and_100bp_down_tss.mc9nr.feather	top50perTarget	0.9	0.0144155	95.0417	1.44179	0.330187	4.36658	1.26206e-05	0.000141145	Upregulated	HW_vs_CW	obesity_upregulated
E2f1	Paqr9	TRUE	3	tfdimers__MD00236	3.55	r80__500bp_up_and_100bp_down_tss.mc9nr.feather	top50perTarget	0.2	0.00694242	6551.17	1.84965	0.24051	7.69053	1.46524e-14	1.25135e-12	Upregulated	HW_vs_CW	obesity_upregulated
E2f1	Pik3cd	TRUE	3	tfdimers__MD00236	3.55	r80__500bp_up_and_100bp_down_tss.mc9nr.feather	top50perTarget	0.9	0.0125153	1624.19	1.01758	0.243679	4.1759	2.96807e-05	0.000297682	Upregulated	HW_vs_CW	obesity_upregulated
E2f1	Stap1	TRUE	1	tfdimers__MD00236	3.55	r80__500bp_up_and_100bp_down_tss.mc9nr.feather	top50perTarget	0.9	0.0143538	356.789	1.84256	0.343526	5.36368	8.15439e-08	1.73266e-06	Upregulated	HW_vs_CW	obesity_upregulated
E2f1	Tlr3	TRUE	1	tfdimers__MD00236	3.55	r80__500bp_up_and_100bp_down_tss.mc9nr.feather	top50perTarget	0.9	0.0129142	1246.34	0.717422	0.16039	4.47298	7.71373e-06	9.29606e-05	Upregulated	HW_vs_CW	obesity_upregulated
E2f1	Trim21	TRUE	2	tfdimers__MD00236	3.55	r80__500bp_up_and_100bp_down_tss.mc9nr.feather	top50perTarget	0.7	0.0106533	948.372	0.566615	0.13405	4.22689	2.36942e-05	0.000244477	Upregulated	HW_vs_CW	obesity_upregulated
E2f1	Wdfy4	TRUE	1	tfdimers__MD00236	3.55	r80__500bp_up_and_100bp_down_tss.mc9nr.feather	top50perTarget	0.8	0.00893139	1687.36	0.902248	0.332206	2.71593	0.00660908	0.0269388	Upregulated	HW_vs_CW	obesity_upregulated
E2f1	Xaf1	TRUE	2	tfdimers__MD00236	3.55	r80__500bp_up_and_100bp_down_tss.mc9nr.feather	top50perTarget	0.3	0.00785821	1284.12	0.535537	0.158937	3.3695	0.000753053	0.00454602	Upregulated	HW_vs_CW	obesity_upregulated
E2f1	Egr2	TRUE	9	cisbp__M5350	3.51	r80__500bp_up_and_100bp_down_tss.mc9nr.feather	top50perTarget	0.9	0.0118051	559.946	2.186	0.407357	5.36629	8.03732e-08	1.71291e-06	Upregulated	HW_vs_CW	obesity_upregulated
E2f1	Angpt2	TRUE	3	cisbp__M3133	3.46	r80__500bp_up_and_100bp_down_tss.mc9nr.feather	w0.005	0.2	0.0140928	933.986	0.763344	0.166779	4.57696	4.71771e-06	6.04749e-05	Upregulated	HW_vs_CW	obesity_upregulated
E2f1	Ccna2	TRUE	3	cisbp__M3133	3.46	r80__500bp_up_and_100bp_down_tss.mc9nr.feather	w0.005	0.7	0.00504542	258.89	1.77272	0.359855	4.92619	8.38465e-07	1.31384e-05	Upregulated	HW_vs_CW	obesity_upregulated
E2f1	Dcstamp	TRUE	2	cisbp__M3133	3.46	r80__500bp_up_and_100bp_down_tss.mc9nr.feather	w0.005	0.5	0.00909803	124.763	3.88866	0.540525	7.19422	6.28201e-13	3.8488e-11	Upregulated	HW_vs_CW	obesity_upregulated
E2f1	Gfra2	TRUE	4	cisbp__M3133	3.46	r80__500bp_up_and_100bp_down_tss.mc9nr.feather	w0.005	0.7	0.00684131	935.137	0.651156	0.26317	2.47428	0.0133507	0.0472773	Upregulated	HW_vs_CW	obesity_upregulated
E2f1	Gla	TRUE	2	cisbp__M3133	3.46	r80__500bp_up_and_100bp_down_tss.mc9nr.feather	w0.005	1	0.0063855	1023.24	1.44773	0.280101	5.16859	2.35872e-07	4.33267e-06	Upregulated	HW_vs_CW	obesity_upregulated
E2f1	Hgf	TRUE	4	cisbp__M3133	3.46	r80__500bp_up_and_100bp_down_tss.mc9nr.feather	w0.005	1	0.0120741	429.725	1.35955	0.188676	7.20576	5.77215e-13	3.59221e-11	Upregulated	HW_vs_CW	obesity_upregulated
E2f1	Kcnq1	TRUE	1	cisbp__M3133	3.46	r80__500bp_up_and_100bp_down_tss.mc9nr.feather	w0.005	0.8	0.00699258	325.725	0.868832	0.340958	2.54821	0.0108278	0.0400021	Upregulated	HW_vs_CW	obesity_upregulated
E2f1	Kpna2	TRUE	6	cisbp__M3133	3.46	r80__500bp_up_and_100bp_down_tss.mc9nr.feather	w0.005	0.6	0.00916186	1980.09	0.975656	0.120213	8.11608	4.81472e-16	5.0794e-14	Upregulated	HW_vs_CW	obesity_upregulated
E2f1	Lurap1l	TRUE	1	cisbp__M3133	3.46	r80__500bp_up_and_100bp_down_tss.mc9nr.feather	w0.005	0.4	0.00509248	968.502	0.528243	0.186294	2.83554	0.00457484	0.0200699	Upregulated	HW_vs_CW	obesity_upregulated
E2f1	Mansc1	TRUE	3	cisbp__M3133	3.46	r80__500bp_up_and_100bp_down_tss.mc9nr.feather	w0.005	0.8	0.00786527	447.665	0.745434	0.233984	3.18583	0.0014434	0.00780361	Upregulated	HW_vs_CW	obesity_upregulated
E2f1	Mpdz	TRUE	1	cisbp__M3133	3.46	r80__500bp_up_and_100bp_down_tss.mc9nr.feather	w0.005	0.5	0.00793348	8174.18	1.0149	0.144228	7.0368	1.9671e-12	1.09934e-10	Upregulated	HW_vs_CW	obesity_upregulated
E2f1	Shtn1	TRUE	2	cisbp__M3133	3.46	r80__500bp_up_and_100bp_down_tss.mc9nr.feather	w0.005	0.9	0.0137105	2013.39	1.08855	0.225793	4.82103	1.42821e-06	2.11055e-05	Upregulated	HW_vs_CW	obesity_upregulated
E2f1	Snx7	TRUE	2	cisbp__M3133	3.46	r80__500bp_up_and_100bp_down_tss.mc9nr.feather	w0.005	0.9	0.00974596	1561.07	0.737837	0.185997	3.96694	7.28017e-05	0.000638325	Upregulated	HW_vs_CW	obesity_upregulated
E2f1	Stard6	TRUE	3	cisbp__M3133	3.46	r80__500bp_up_and_100bp_down_tss.mc9nr.feather	w0.005	0.9	0.0062902	105.029	1.17149	0.383232	3.05687	0.00223658	0.0111818	Upregulated	HW_vs_CW	obesity_upregulated
E2f1	Ticrr	TRUE	5	cisbp__M3133	3.46	r80__500bp_up_and_100bp_down_tss.mc9nr.feather	w0.005	0.7	0.00651417	38.7343	1.95132	0.459377	4.24776	2.15923e-05	0.000225741	Upregulated	HW_vs_CW	obesity_upregulated
E2f1	Cdk18	TRUE	3	transfac_pro__M08874	3.44	r80__500bp_up_and_100bp_down_tss.mc9nr.feather	w0.005	0.9	0.00789676	990.237	0.935662	0.374143	2.50082	0.0123907	0.0445741	Upregulated	HW_vs_CW	obesity_upregulated
E2f1	Fam114a1	TRUE	3	transfac_pro__M08874	3.44	r80__500bp_up_and_100bp_down_tss.mc9nr.feather	w0.005	0.9	0.00799945	3879.37	1.17607	0.171709	6.84923	7.42477e-12	3.77515e-10	Upregulated	HW_vs_CW	obesity_upregulated
E2f1	Fmn1	TRUE	2	transfac_pro__M08874	3.44	r80__500bp_up_and_100bp_down_tss.mc9nr.feather	w0.005	0.9	0.00868775	648.472	0.822775	0.275163	2.99014	0.00278854	0.0134013	Upregulated	HW_vs_CW	obesity_upregulated
E2f1	Gadd45a	TRUE	1	transfac_pro__M08874	3.44	r80__500bp_up_and_100bp_down_tss.mc9nr.feather	w0.005	0.9	0.00547546	649.938	1.74245	0.287642	6.05769	1.38087e-09	4.40093e-08	Upregulated	HW_vs_CW	obesity_upregulated
E2f1	Hivep3	TRUE	4	transfac_pro__M08874	3.44	r80__500bp_up_and_100bp_down_tss.mc9nr.feather	w0.005	0.9	0.00509235	1074.37	0.618284	0.210739	2.93389	0.00334746	0.0156009	Upregulated	HW_vs_CW	obesity_upregulated
E2f1	Plekha7	TRUE	3	transfac_pro__M08874	3.44	r80__500bp_up_and_100bp_down_tss.mc9nr.feather	w0.005	0.8	0.0104195	1203.95	0.978265	0.319503	3.06183	0.00219985	0.0110419	Upregulated	HW_vs_CW	obesity_upregulated
E2f1	Tiam1	TRUE	3	transfac_pro__M08874	3.44	r80__500bp_up_and_100bp_down_tss.mc9nr.feather	w0.005	0.8	0.00564073	2000.14	1.10418	0.30491	3.62133	0.000293088	0.0020678	Upregulated	HW_vs_CW	obesity_upregulated
E2f1	Amotl2	TRUE	3	tfdimers__MD00007	3.4	r80__500bp_up_and_100bp_down_tss.mc9nr.feather	w0.001	0.4	0.004562	16514.4	0.575118	0.200712	2.8654	0.00416489	0.0186231	Upregulated	HW_vs_CW	obesity_upregulated
E2f1	Anln	TRUE	2	tfdimers__MD00007	3.4	r80__500bp_up_and_100bp_down_tss.mc9nr.feather	w0.001	0.6	0.0154759	1073.5	0.611562	0.228688	2.67422	0.00749032	0.0297922	Upregulated	HW_vs_CW	obesity_upregulated
E2f1	Car6	TRUE	1	tfdimers__MD00007	3.4	r80__500bp_up_and_100bp_down_tss.mc9nr.feather	w0.001	0.9	0.00865487	23.3181	2.76324	0.902829	3.06064	0.00220862	0.0110728	Upregulated	HW_vs_CW	obesity_upregulated
E2f1	Ccnd1	TRUE	2	tfdimers__MD00007	3.4	r80__500bp_up_and_100bp_down_tss.mc9nr.feather	w0.001	0.7	0.00196931	2440.17	1.19476	0.293808	4.06646	4.77324e-05	0.000442719	Upregulated	HW_vs_CW	obesity_upregulated
E2f1	Ctss	TRUE	1	tfdimers__MD00007	3.4	r80__500bp_up_and_100bp_down_tss.mc9nr.feather	w0.001	0.9	0.00699216	15275.1	2.12751	0.314401	6.76688	1.31591e-11	6.49008e-10	Upregulated	HW_vs_CW	obesity_upregulated
E2f1	Cybb	TRUE	1	tfdimers__MD00007	3.4	r80__500bp_up_and_100bp_down_tss.mc9nr.feather	w0.001	0.9	0.0051508	4709.81	1.24422	0.346584	3.58995	0.000330742	0.00228943	Upregulated	HW_vs_CW	obesity_upregulated
E2f1	Dapp1	TRUE	2	tfdimers__MD00007	3.4	r80__500bp_up_and_100bp_down_tss.mc9nr.feather	w0.001	0.8	0.00627856	690.358	0.821258	0.240644	3.41275	0.000643105	0.00398592	Upregulated	HW_vs_CW	obesity_upregulated
E2f1	Ddx60	TRUE	1	tfdimers__MD00007	3.4	r80__500bp_up_and_100bp_down_tss.mc9nr.feather	w0.001	0.8	0.0065864	562.008	1.04676	0.359127	2.91474	0.00355987	0.0163895	Upregulated	HW_vs_CW	obesity_upregulated
E2f1	Dhx58	TRUE	1	tfdimers__MD00007	3.4	r80__500bp_up_and_100bp_down_tss.mc9nr.feather	w0.001	0.9	0.00337405	565.923	1.2492	0.349578	3.57346	0.000352299	0.00240907	Upregulated	HW_vs_CW	obesity_upregulated
E2f1	Ifi44	TRUE	1	tfdimers__MD00007	3.4	r80__500bp_up_and_100bp_down_tss.mc9nr.feather	w0.001	0.4	0.00217867	398.806	1.13032	0.359076	3.14785	0.00164475	0.00868049	Upregulated	HW_vs_CW	obesity_upregulated
E2f1	Ifit1	TRUE	1	tfdimers__MD00007	3.4	r80__500bp_up_and_100bp_down_tss.mc9nr.feather	w0.001	0.4	0.00239292	733.798	0.506721	0.164794	3.07488	0.00210587	0.0106415	Upregulated	HW_vs_CW	obesity_upregulated
E2f1	Ifit3	TRUE	1	tfdimers__MD00007	3.4	r80__500bp_up_and_100bp_down_tss.mc9nr.feather	w0.001	0.5	0.0059203	1485.05	0.752659	0.211084	3.56569	0.000362906	0.00247132	Upregulated	HW_vs_CW	obesity_upregulated
E2f1	Isg15	TRUE	1	tfdimers__MD00007	3.4	r80__500bp_up_and_100bp_down_tss.mc9nr.feather	w0.001	0.7	0.00688033	484.766	0.71558	0.222924	3.20997	0.00132749	0.0072888	Upregulated	HW_vs_CW	obesity_upregulated
E2f1	Klhl29	TRUE	1	tfdimers__MD00007	3.4	r80__500bp_up_and_100bp_down_tss.mc9nr.feather	w0.001	0.8	0.00336866	1013.34	1.00733	0.396767	2.53883	0.0111223	0.0408148	Upregulated	HW_vs_CW	obesity_upregulated
E2f1	Mllt3	TRUE	1	tfdimers__MD00007	3.4	r80__500bp_up_and_100bp_down_tss.mc9nr.feather	w0.001	0.3	0.00141891	1736.9	0.895057	0.242591	3.68957	0.000224633	0.00166432	Upregulated	HW_vs_CW	obesity_upregulated
E2f1	Nin	TRUE	4	tfdimers__MD00007	3.4	r80__500bp_up_and_100bp_down_tss.mc9nr.feather	w0.001	0.9	0.00759452	4311.75	0.575738	0.101396	5.67813	1.36175e-08	3.44418e-07	Upregulated	HW_vs_CW	obesity_upregulated
E2f1	Plxnc1	TRUE	2	tfdimers__MD00007	3.4	r80__500bp_up_and_100bp_down_tss.mc9nr.feather	w0.001	0.820783	0.00222976	1124.32	0.697576	0.284755	2.44974	0.014296	0.0498794	Upregulated	HW_vs_CW	obesity_upregulated
E2f1	Rtp4	TRUE	1	tfdimers__MD00007	3.4	r80__500bp_up_and_100bp_down_tss.mc9nr.feather	w0.001	0.7	0.00662181	1035.97	0.66429	0.157014	4.23078	2.32887e-05	0.000240796	Upregulated	HW_vs_CW	obesity_upregulated
E2f1	Tsc22d1	TRUE	2	tfdimers__MD00007	3.4	r80__500bp_up_and_100bp_down_tss.mc9nr.feather	w0.001	0.3	0.00343932	17514.7	0.729001	0.261246	2.79047	0.00526308	0.0224207	Upregulated	HW_vs_CW	obesity_upregulated
E2f1	4930579G24Rik	TRUE	5	taipale__E2F1_DBD_TTTGGCGCCAAA	3.31	r80__500bp_up_and_100bp_down_tss.mc9nr.feather	w0.005	0.9	0.00730461	138.194	0.919723	0.196711	4.6755	2.93232e-06	3.99785e-05	Upregulated	HW_vs_CW	obesity_upregulated
E2f1	Arrdc4	TRUE	12	taipale__E2F1_DBD_TTTGGCGCCAAA	3.31	r80__500bp_up_and_100bp_down_tss.mc9nr.feather	w0.005	0.9	0.0164155	2310.68	0.533961	0.139356	3.83163	0.000127298	0.00102629	Upregulated	HW_vs_CW	obesity_upregulated
E2f1	Hck	TRUE	2	taipale__E2F1_DBD_TTTGGCGCCAAA	3.31	r80__500bp_up_and_100bp_down_tss.mc9nr.feather	w0.005	0.4	0.00630638	499.637	1.4317	0.374202	3.82602	0.000130234	0.00104654	Upregulated	HW_vs_CW	obesity_upregulated
E2f1	Sh3bp2	TRUE	6	transfac_pro__M00938	3.03	r80__10kb_up_and_down_tss.mc9nr.feather	top50	0.9	0.0187361	1247.44	1.22739	0.241666	5.07888	3.79656e-07	6.5952e-06	Upregulated	HW_vs_CW	obesity_upregulated
E2f2	Atad2	TRUE	88	taipale__E2F2_DBD_NNTTTTGGCGCCAAAANN	9.47	r80__10kb_up_and_down_tss.mc9nr.feather	top10perTarget	0.9	0.0143237	928.942	0.611163	0.156978	3.89331	9.88874e-05	0.000829796	Upregulated	HW_vs_CW	obesity_upregulated
E2f2	Cilp	TRUE	35	taipale__E2F2_DBD_NNTTTTGGCGCCAAAANN	9.47	r80__10kb_up_and_down_tss.mc9nr.feather	top10perTarget	0.4	0.0428869	1795.1	1.6096	0.470199	3.42323	0.000618827	0.00385463	Upregulated	HW_vs_CW	obesity_upregulated
E2f2	E2f2	TRUE	89	taipale__E2F2_DBD_NNTTTTGGCGCCAAAANN	9.47	r80__10kb_up_and_down_tss.mc9nr.feather	top10perTarget	1	NA	181.326	1.4183	0.341802	4.1495	3.33208e-05	0.000328348	Upregulated	HW_vs_CW	obesity_upregulated
E2f2	Ect2	TRUE	29	taipale__E2F2_DBD_NNTTTTGGCGCCAAAANN	9.47	r80__10kb_up_and_down_tss.mc9nr.feather	top10perTarget	0.6	0.0166609	176.066	1.30804	0.303509	4.30972	1.63459e-05	0.000177182	Upregulated	HW_vs_CW	obesity_upregulated
E2f2	Gins1	TRUE	93	taipale__E2F2_DBD_NNTTTTGGCGCCAAAANN	9.47	r80__10kb_up_and_down_tss.mc9nr.feather	top10perTarget	0.872082	0.0147408	136.144	0.539727	0.215098	2.50922	0.0120999	0.0437193	Upregulated	HW_vs_CW	obesity_upregulated
E2f2	Hgf	TRUE	27	taipale__E2F2_DBD_NNTTTTGGCGCCAAAANN	9.47	r80__10kb_up_and_down_tss.mc9nr.feather	top10perTarget	0.6	0.0157963	429.725	1.35955	0.188676	7.20576	5.77215e-13	3.59221e-11	Upregulated	HW_vs_CW	obesity_upregulated
E2f2	Jade3	TRUE	42	taipale__E2F2_DBD_NNTTTTGGCGCCAAAANN	9.47	r80__10kb_up_and_down_tss.mc9nr.feather	top10perTarget	0.6	0.0167448	816.832	0.720095	0.167296	4.30431	1.67505e-05	0.000180872	Upregulated	HW_vs_CW	obesity_upregulated
E2f2	Kcng2	TRUE	7	taipale__E2F2_DBD_NNTTTTGGCGCCAAAANN	9.47	r80__10kb_up_and_down_tss.mc9nr.feather	top10perTarget	0.3	0.0350291	22.8857	1.93711	0.665416	2.91113	0.00360119	0.0165373	Upregulated	HW_vs_CW	obesity_upregulated
E2f2	Nfkbie	TRUE	9	taipale__E2F2_DBD_NNTTTTGGCGCCAAAANN	9.47	r80__10kb_up_and_down_tss.mc9nr.feather	top10perTarget	0.5	0.0219574	377.874	0.899824	0.260076	3.45985	0.000540483	0.00344178	Upregulated	HW_vs_CW	obesity_upregulated
E2f2	Prps1	TRUE	49	taipale__E2F2_DBD_NNTTTTGGCGCCAAAANN	9.47	r80__10kb_up_and_down_tss.mc9nr.feather	top10perTarget	0.7	0.0150772	8348.48	0.870546	0.209751	4.15038	3.31917e-05	0.000327239	Upregulated	HW_vs_CW	obesity_upregulated
E2f2	Rnf145	TRUE	32	taipale__E2F2_DBD_NNTTTTGGCGCCAAAANN	9.47	r80__10kb_up_and_down_tss.mc9nr.feather	top10perTarget	0.7	0.0133814	5144.88	0.584147	0.167118	3.49542	0.000473321	0.0030853	Upregulated	HW_vs_CW	obesity_upregulated
E2f2	Rrm2	TRUE	54	taipale__E2F2_DBD_NNTTTTGGCGCCAAAANN	9.47	r80__10kb_up_and_down_tss.mc9nr.feather	top10perTarget	0.7	0.0169025	311.624	1.53804	0.302203	5.08942	3.59154e-07	6.29354e-06	Upregulated	HW_vs_CW	obesity_upregulated
E2f2	Srd5a3	TRUE	16	taipale__E2F2_DBD_NNTTTTGGCGCCAAAANN	9.47	r80__10kb_up_and_down_tss.mc9nr.feather	top10perTarget	0.6	0.0156523	1524.17	0.626699	0.215435	2.90899	0.00362602	0.0166204	Upregulated	HW_vs_CW	obesity_upregulated
E2f2	Ephb3	TRUE	17	cisbp__M5355	8.92	r80__10kb_up_and_down_tss.mc9nr.feather	top10perTarget	0.6	0.0128979	362.888	0.723176	0.243728	2.96715	0.00300576	0.0142748	Upregulated	HW_vs_CW	obesity_upregulated
E2f2	Dock10	TRUE	43	transfac_pro__M08875	6.18	r80__10kb_up_and_down_tss.mc9nr.feather	top10perTarget	0.7	0.0138297	3252.78	1.22306	0.216768	5.64226	1.67833e-08	4.14394e-07	Upregulated	HW_vs_CW	obesity_upregulated
E2f2	Hmga2	TRUE	16	transfac_pro__M08875	6.18	r80__10kb_up_and_down_tss.mc9nr.feather	top10perTarget	0.6	0.0136709	44.1691	4.7283	1.23414	3.83126	0.000127489	0.00102741	Upregulated	HW_vs_CW	obesity_upregulated
E2f2	Tcf3	TRUE	8	transfac_pro__M08875	6.18	r80__10kb_up_and_down_tss.mc9nr.feather	top10perTarget	0.7	0.0154336	2415.3	0.504912	0.143249	3.52472	0.000423933	0.00280838	Upregulated	HW_vs_CW	obesity_upregulated
E2f2	Tyms	TRUE	11	transfac_pro__M08875	6.18	r80__10kb_up_and_down_tss.mc9nr.feather	top10perTarget	0.7	0.0167688	367.094	0.709706	0.188413	3.76675	0.000165387	0.00128446	Upregulated	HW_vs_CW	obesity_upregulated
E2f2	Klhl5	TRUE	29	taipale_cyt_meth__E2F2_NWTTTGGCGCCAWWWN_eDBD_meth	6.16	r80__10kb_up_and_down_tss.mc9nr.feather	top10perTarget	0.6	0.0135172	7226.43	0.903586	0.189442	4.76972	1.84484e-06	2.64691e-05	Upregulated	HW_vs_CW	obesity_upregulated
E2f2	Megf9	TRUE	5	taipale_cyt_meth__E2F2_NWTTTGGCGCCAWWWN_eDBD_meth	6.16	r80__10kb_up_and_down_tss.mc9nr.feather	top10perTarget	1	0.0134691	3931.64	0.658729	0.137419	4.79356	1.63844e-06	2.36974e-05	Upregulated	HW_vs_CW	obesity_upregulated
E2f2	Ntng2	TRUE	24	taipale_cyt_meth__E2F2_NWTTTGGCGCCAWWWN_eDBD_meth	6.16	r80__10kb_up_and_down_tss.mc9nr.feather	top10perTarget	0.6	0.0171458	1428.79	0.808828	0.256073	3.15859	0.00158536	0.00843096	Upregulated	HW_vs_CW	obesity_upregulated
E2f2	Pkib	TRUE	24	taipale_cyt_meth__E2F2_NWTTTGGCGCCAWWWN_eDBD_meth	6.16	r80__10kb_up_and_down_tss.mc9nr.feather	top10perTarget	0.6	0.0190854	131.256	2.26264	0.421955	5.36228	8.21788e-08	1.73951e-06	Upregulated	HW_vs_CW	obesity_upregulated
E2f2	Plk4	TRUE	19	taipale_cyt_meth__E2F2_NWTTTGGCGCCAWWWN_eDBD_meth	6.16	r80__10kb_up_and_down_tss.mc9nr.feather	top10perTarget	0.7	0.01607	432.836	1.12547	0.211157	5.33001	9.82084e-08	2.03943e-06	Upregulated	HW_vs_CW	obesity_upregulated
E2f2	Tll1	TRUE	32	taipale_cyt_meth__E2F2_NWTTTGGCGCCAWWWN_eDBD_meth	6.16	r80__10kb_up_and_down_tss.mc9nr.feather	top10perTarget	1	0.0166903	350.625	1.11597	0.151474	7.36739	1.74004e-13	1.20027e-11	Upregulated	HW_vs_CW	obesity_upregulated
E2f2	Akirin1	TRUE	22	cisbp__M0670	5.58	r80__500bp_up_and_100bp_down_tss.mc9nr.feather	top10perTarget	0.6	0.0144604	4537.38	0.641876	0.127641	5.02874	4.93711e-07	8.34612e-06	Upregulated	HW_vs_CW	obesity_upregulated
E2f2	Apex2	TRUE	12	cisbp__M0670	5.58	r80__500bp_up_and_100bp_down_tss.mc9nr.feather	top10perTarget	0.7	0.0277369	690.25	0.52536	0.16682	3.14927	0.00163679	0.00865236	Upregulated	HW_vs_CW	obesity_upregulated
E2f2	Alpk1	TRUE	12	taipale_cyt_meth__E2F2_NWTTTGGCGCCAWWWN_eDBD_repr	5.54	r80__10kb_up_and_down_tss.mc9nr.feather	top10perTarget	1	0.0227526	828.718	0.627036	0.156504	4.0065	6.16239e-05	0.000551549	Upregulated	HW_vs_CW	obesity_upregulated
E2f2	Lbh	TRUE	12	taipale_cyt_meth__E2F2_NWTTTGGCGCCAWWWN_eDBD_repr	5.54	r80__10kb_up_and_down_tss.mc9nr.feather	top10perTarget	0.7	0.0162197	3769.79	0.625355	0.242759	2.57603	0.0099941	0.0375927	Upregulated	HW_vs_CW	obesity_upregulated
E2f2	Top2a	TRUE	5	taipale_cyt_meth__E2F2_NWTTTGGCGCCAWWWN_eDBD_repr	5.54	r80__10kb_up_and_down_tss.mc9nr.feather	top10perTarget	0.7	0.0142706	731.661	1.8284	0.287611	6.35719	2.05471e-10	8.07478e-09	Upregulated	HW_vs_CW	obesity_upregulated
E2f2	Sez6l	TRUE	15	transfac_pro__M02846	5.34	r80__10kb_up_and_down_tss.mc9nr.feather	top10perTarget	0.5	0.0169645	798.658	3.84294	0.528931	7.26547	3.71732e-13	2.38101e-11	Upregulated	HW_vs_CW	obesity_upregulated
E2f2	Ap1s1	TRUE	17	cisbp__M4672	4.92	r80__500bp_up_and_100bp_down_tss.mc9nr.feather	w0.005	0.3	0.00637851	3773.62	0.63383	0.14745	4.29861	1.71871e-05	0.000184678	Upregulated	HW_vs_CW	obesity_upregulated
E2f2	Asf1b	TRUE	8	cisbp__M4672	4.92	r80__500bp_up_and_100bp_down_tss.mc9nr.feather	w0.005	0.5	0.00500443	155.752	1.24151	0.353026	3.51675	0.000436865	0.00288147	Upregulated	HW_vs_CW	obesity_upregulated
E2f2	Aurka	TRUE	25	cisbp__M4672	4.92	r80__500bp_up_and_100bp_down_tss.mc9nr.feather	w0.005	0.1	0.00671768	178.475	0.63908	0.22402	2.85278	0.00433389	0.0192176	Upregulated	HW_vs_CW	obesity_upregulated
E2f2	Bahcc1	TRUE	24	cisbp__M4672	4.92	r80__500bp_up_and_100bp_down_tss.mc9nr.feather	w0.005	0.3	0.00780216	2053.31	1.13392	0.360898	3.14195	0.00167828	0.00882281	Upregulated	HW_vs_CW	obesity_upregulated
E2f2	Brca1	TRUE	23	cisbp__M4672	4.92	r80__500bp_up_and_100bp_down_tss.mc9nr.feather	w0.005	0.7	0.00509049	210.321	2.90219	0.440177	6.59325	4.30306e-11	1.92061e-09	Upregulated	HW_vs_CW	obesity_upregulated
E2f2	Bub1	TRUE	1	cisbp__M4672	4.92	r80__500bp_up_and_100bp_down_tss.mc9nr.feather	w0.005	0.6	0.00614129	89.8227	2.3688	0.485929	4.8748	1.08921e-06	1.65801e-05	Upregulated	HW_vs_CW	obesity_upregulated
E2f2	Ccdc88a	TRUE	2	cisbp__M4672	4.92	r80__500bp_up_and_100bp_down_tss.mc9nr.feather	w0.005	0.6	0.0135505	1716.82	0.7164	0.149245	4.80016	1.5854e-06	2.29976e-05	Upregulated	HW_vs_CW	obesity_upregulated
E2f2	Cd180	TRUE	2	cisbp__M4672	4.92	r80__500bp_up_and_100bp_down_tss.mc9nr.feather	w0.005	0.6	0.00575103	1032.65	2.67514	0.415604	6.43675	1.22057e-10	4.99571e-09	Upregulated	HW_vs_CW	obesity_upregulated
E2f2	Cdca5	TRUE	9	cisbp__M4672	4.92	r80__500bp_up_and_100bp_down_tss.mc9nr.feather	w0.005	0.6	0.007611	54.1365	2.05043	0.45736	4.48318	7.35388e-06	8.92235e-05	Upregulated	HW_vs_CW	obesity_upregulated
E2f2	Cep250	TRUE	5	cisbp__M4672	4.92	r80__500bp_up_and_100bp_down_tss.mc9nr.feather	w0.005	0.7	0.0082795	2439.13	0.584987	0.146024	4.00611	6.17269e-05	0.000551767	Upregulated	HW_vs_CW	obesity_upregulated
E2f2	Dnmt1	TRUE	35	cisbp__M4672	4.92	r80__500bp_up_and_100bp_down_tss.mc9nr.feather	w0.005	0.7	0.00665498	2591.99	0.598304	0.196053	3.05174	0.00227518	0.0113374	Upregulated	HW_vs_CW	obesity_upregulated
E2f2	Dnmt3aos	TRUE	1	cisbp__M4672	4.92	r80__500bp_up_and_100bp_down_tss.mc9nr.feather	w0.005	0.6	0.00915021	71.1393	4.76783	0.720879	6.61392	3.74283e-11	1.68197e-09	Upregulated	HW_vs_CW	obesity_upregulated
E2f2	Dscc1	TRUE	20	cisbp__M4672	4.92	r80__500bp_up_and_100bp_down_tss.mc9nr.feather	w0.005	0.6	0.0065503	35.7851	1.18914	0.466931	2.54672	0.010874	0.0401278	Upregulated	HW_vs_CW	obesity_upregulated
E2f2	Dtl	TRUE	21	cisbp__M4672	4.92	r80__500bp_up_and_100bp_down_tss.mc9nr.feather	w0.005	0.7	0.00736745	159.623	2.28099	0.302233	7.54714	4.44926e-14	3.41537e-12	Upregulated	HW_vs_CW	obesity_upregulated
E2f2	E2f1	TRUE	37	cisbp__M4672	4.92	r80__500bp_up_and_100bp_down_tss.mc9nr.feather	w0.005	0.6	0.00871021	937.562	1.38249	0.319895	4.32169	1.54838e-05	0.000169608	Upregulated	HW_vs_CW	obesity_upregulated
E2f2	E2f8	TRUE	33	cisbp__M4672	4.92	r80__500bp_up_and_100bp_down_tss.mc9nr.feather	w0.005	0.7	0.00534597	73.848	2.07947	0.501464	4.1468	3.37149e-05	0.000331278	Upregulated	HW_vs_CW	obesity_upregulated
E2f2	Frmd4a	TRUE	5	cisbp__M4672	4.92	r80__500bp_up_and_100bp_down_tss.mc9nr.feather	w0.005	0.6	0.00749922	2582.07	0.506797	0.163427	3.10106	0.00192832	0.00989131	Upregulated	HW_vs_CW	obesity_upregulated
E2f2	Gm11266	TRUE	13	cisbp__M4672	4.92	r80__500bp_up_and_100bp_down_tss.mc9nr.feather	w0.005	0.6	0.0136819	153.09	0.918052	0.270021	3.39993	0.000674038	0.00414121	Upregulated	HW_vs_CW	obesity_upregulated
E2f2	Gmppb	TRUE	15	cisbp__M4672	4.92	r80__500bp_up_and_100bp_down_tss.mc9nr.feather	w0.005	0.4	0.00543059	715.261	0.868647	0.176318	4.9266	8.36741e-07	1.31218e-05	Upregulated	HW_vs_CW	obesity_upregulated
E2f2	Haglr	TRUE	1	cisbp__M4672	4.92	r80__500bp_up_and_100bp_down_tss.mc9nr.feather	w0.005	0.1	0.0091369	26.6396	2.21388	0.718947	3.07934	0.00207458	0.010513	Upregulated	HW_vs_CW	obesity_upregulated
E2f2	Hdac9	TRUE	1	cisbp__M4672	4.92	r80__500bp_up_and_100bp_down_tss.mc9nr.feather	w0.005	0.6	0.0107817	813.247	1.33914	0.182387	7.34229	2.09972e-13	1.40896e-11	Upregulated	HW_vs_CW	obesity_upregulated
E2f2	Hells	TRUE	28	cisbp__M4672	4.92	r80__500bp_up_and_100bp_down_tss.mc9nr.feather	w0.005	0.6	0.01263	173.075	1.36648	0.320173	4.26793	1.97294e-05	0.00020881	Upregulated	HW_vs_CW	obesity_upregulated
E2f2	Il7	TRUE	1	cisbp__M4672	4.92	r80__500bp_up_and_100bp_down_tss.mc9nr.feather	w0.005	0.4	0.00635297	130.517	1.03906	0.334445	3.10683	0.00189103	0.0097335	Upregulated	HW_vs_CW	obesity_upregulated
E2f2	Knl1	TRUE	4	cisbp__M4672	4.92	r80__500bp_up_and_100bp_down_tss.mc9nr.feather	w0.005	0.5	0.00519413	115.819	1.63783	0.362671	4.51602	6.30118e-06	7.81822e-05	Upregulated	HW_vs_CW	obesity_upregulated
E2f2	Magi1	TRUE	14	cisbp__M4672	4.92	r80__500bp_up_and_100bp_down_tss.mc9nr.feather	w0.005	0.6	0.0116584	2889.76	0.707543	0.191197	3.7006	0.000215088	0.00160851	Upregulated	HW_vs_CW	obesity_upregulated
E2f2	Mcm5	TRUE	36	cisbp__M4672	4.92	r80__500bp_up_and_100bp_down_tss.mc9nr.feather	w0.005	0.6	0.00857086	613.744	1.34046	0.258414	5.18725	2.13426e-07	4.00616e-06	Upregulated	HW_vs_CW	obesity_upregulated
E2f2	Mcm6	TRUE	35	cisbp__M4672	4.92	r80__500bp_up_and_100bp_down_tss.mc9nr.feather	w0.005	0.7	0.0105802	1384.83	0.712588	0.180792	3.94149	8.09773e-05	0.000698217	Upregulated	HW_vs_CW	obesity_upregulated
E2f2	Metrn	TRUE	9	cisbp__M4672	4.92	r80__500bp_up_and_100bp_down_tss.mc9nr.feather	w0.005	0.3	0.00544968	497.243	1.91338	0.229684	8.33049	8.05065e-17	9.62564e-15	Upregulated	HW_vs_CW	obesity_upregulated
E2f2	Mms22l	TRUE	6	cisbp__M4672	4.92	r80__500bp_up_and_100bp_down_tss.mc9nr.feather	w0.005	0.6	0.00670587	219.102	1.66697	0.268566	6.20694	5.40252e-10	1.88973e-08	Upregulated	HW_vs_CW	obesity_upregulated
E2f2	Mst1r	TRUE	15	cisbp__M4672	4.92	r80__500bp_up_and_100bp_down_tss.mc9nr.feather	w0.005	0.7	0.00556345	1914.07	0.905696	0.269631	3.35902	0.000782204	0.00469894	Upregulated	HW_vs_CW	obesity_upregulated
E2f2	Oip5	TRUE	25	cisbp__M4672	4.92	r80__500bp_up_and_100bp_down_tss.mc9nr.feather	w0.005	0.6	0.00639188	73.7118	1.20799	0.300077	4.02561	5.6828e-05	0.000514032	Upregulated	HW_vs_CW	obesity_upregulated
E2f2	Oxtr	TRUE	2	cisbp__M4672	4.92	r80__500bp_up_and_100bp_down_tss.mc9nr.feather	w0.005	0.6	0.00798403	4139.78	4.49966	0.610662	7.36851	1.72551e-13	1.19441e-11	Upregulated	HW_vs_CW	obesity_upregulated
E2f2	Phf8	TRUE	15	cisbp__M4672	4.92	r80__500bp_up_and_100bp_down_tss.mc9nr.feather	w0.005	0.2	0.00628934	6404.81	0.750822	0.285171	2.63289	0.00846619	0.0329358	Upregulated	HW_vs_CW	obesity_upregulated
E2f2	Pola1	TRUE	34	cisbp__M4672	4.92	r80__500bp_up_and_100bp_down_tss.mc9nr.feather	w0.005	0.7	0.00644238	585.734	0.722206	0.139283	5.18516	2.15824e-07	4.02817e-06	Upregulated	HW_vs_CW	obesity_upregulated
E2f2	Rad51	TRUE	23	cisbp__M4672	4.92	r80__500bp_up_and_100bp_down_tss.mc9nr.feather	w0.005	0.4	0.00603248	92.4332	1.30867	0.366173	3.57392	0.000351674	0.00240562	Upregulated	HW_vs_CW	obesity_upregulated
E2f2	Rad51ap1	TRUE	13	cisbp__M4672	4.92	r80__500bp_up_and_100bp_down_tss.mc9nr.feather	w0.005	0.9	0.00707573	90.8718	1.86993	0.326892	5.72032	1.06322e-08	2.7599e-07	Upregulated	HW_vs_CW	obesity_upregulated
E2f2	Rbl1	TRUE	35	cisbp__M4672	4.92	r80__500bp_up_and_100bp_down_tss.mc9nr.feather	w0.005	0.7	0.00725915	1097.03	0.930003	0.212257	4.38149	1.17868e-05	0.000133408	Upregulated	HW_vs_CW	obesity_upregulated
E2f2	Rcor2	TRUE	10	cisbp__M4672	4.92	r80__500bp_up_and_100bp_down_tss.mc9nr.feather	w0.005	0.4	0.0106686	293.199	1.60355	0.327373	4.89823	9.67032e-07	1.48928e-05	Upregulated	HW_vs_CW	obesity_upregulated
E2f2	Rps6ka3	TRUE	20	cisbp__M4672	4.92	r80__500bp_up_and_100bp_down_tss.mc9nr.feather	w0.005	0.5	0.00678311	13111.4	0.889375	0.149152	5.96289	2.47811e-09	7.45246e-08	Upregulated	HW_vs_CW	obesity_upregulated
E2f2	Scn2a	TRUE	10	cisbp__M4672	4.92	r80__500bp_up_and_100bp_down_tss.mc9nr.feather	w0.005	0.9	0.0128826	156.967	0.687502	0.231163	2.9741	0.00293854	0.0140061	Upregulated	HW_vs_CW	obesity_upregulated
E2f2	Slx4ip	TRUE	17	cisbp__M4672	4.92	r80__500bp_up_and_100bp_down_tss.mc9nr.feather	w0.005	0.6	0.00930595	625.092	0.567742	0.11694	4.85498	1.20397e-06	1.81618e-05	Upregulated	HW_vs_CW	obesity_upregulated
E2f2	Stc2	TRUE	1	cisbp__M4672	4.92	r80__500bp_up_and_100bp_down_tss.mc9nr.feather	w0.005	0.3	0.00500676	1015.6	1.1666	0.252289	4.62404	3.76338e-06	4.95289e-05	Upregulated	HW_vs_CW	obesity_upregulated
E2f2	Tfpi2	TRUE	6	cisbp__M4672	4.92	r80__500bp_up_and_100bp_down_tss.mc9nr.feather	w0.005	0.2	0.00715323	508.109	2.09379	0.33987	6.16054	7.24955e-10	2.44896e-08	Upregulated	HW_vs_CW	obesity_upregulated
E2f2	Tfrc	TRUE	21	cisbp__M4672	4.92	r80__500bp_up_and_100bp_down_tss.mc9nr.feather	w0.005	0.3	0.00554601	1648.94	1.09203	0.208921	5.22701	1.72275e-07	3.31899e-06	Upregulated	HW_vs_CW	obesity_upregulated
E2f2	Topbp1	TRUE	32	cisbp__M4672	4.92	r80__500bp_up_and_100bp_down_tss.mc9nr.feather	w0.005	0.7	0.00611608	2190.42	0.649875	0.130371	4.9848	6.20245e-07	1.01714e-05	Upregulated	HW_vs_CW	obesity_upregulated
E2f2	Zfp36l2	TRUE	12	cisbp__M4672	4.92	r80__500bp_up_and_100bp_down_tss.mc9nr.feather	w0.005	0.6	0.00918645	9228.16	0.75992	0.257569	2.95036	0.00317409	0.0149662	Upregulated	HW_vs_CW	obesity_upregulated
E2f2	Scarf2	TRUE	6	cisbp__M5355	4.82	r80__500bp_up_and_100bp_down_tss.mc9nr.feather	top10perTarget	0.7	0.0158825	1258.03	0.512553	0.161334	3.17697	0.00148822	0.00800642	Upregulated	HW_vs_CW	obesity_upregulated
E2f2	Ccne1	TRUE	7	swissregulon__hs__E2F1..5.p2	4.72	r80__10kb_up_and_down_tss.mc9nr.feather	top10perTarget	0.6	0.0126749	224.865	1.50715	0.295136	5.10665	3.27926e-07	5.8277e-06	Upregulated	HW_vs_CW	obesity_upregulated
E2f2	Fzd2	TRUE	8	swissregulon__hs__E2F1..5.p2	4.72	r80__10kb_up_and_down_tss.mc9nr.feather	top10perTarget	0.7	0.0157584	546.524	0.715856	0.24537	2.91746	0.00352899	0.0162853	Upregulated	HW_vs_CW	obesity_upregulated
E2f2	Gins2	TRUE	21	swissregulon__hs__E2F1..5.p2	4.72	r80__10kb_up_and_down_tss.mc9nr.feather	top10perTarget	0.6	0.0129935	341.141	0.874331	0.243135	3.59607	0.000323059	0.0022457	Upregulated	HW_vs_CW	obesity_upregulated
E2f2	Irf8	TRUE	6	swissregulon__hs__E2F1..5.p2	4.72	r80__10kb_up_and_down_tss.mc9nr.feather	top10perTarget	0.7	0.02548	1910.35	0.783437	0.227515	3.44345	0.000574345	0.00362003	Upregulated	HW_vs_CW	obesity_upregulated
E2f2	Scimp	TRUE	1	swissregulon__hs__E2F1..5.p2	4.72	r80__10kb_up_and_down_tss.mc9nr.feather	top10perTarget	0.6	0.0164111	47.8207	0.949898	0.37945	2.50336	0.0123022	0.0443202	Upregulated	HW_vs_CW	obesity_upregulated
E2f2	St8sia4	TRUE	9	swissregulon__hs__E2F1..5.p2	4.72	r80__10kb_up_and_down_tss.mc9nr.feather	top10perTarget	0.6	0.0141552	1970.79	0.863189	0.309812	2.78617	0.00533348	0.0226765	Upregulated	HW_vs_CW	obesity_upregulated
E2f2	Angptl1	TRUE	3	cisbp__M6191	4.51	r80__500bp_up_and_100bp_down_tss.mc9nr.feather	w0.005	0.1	0.0069841	400.928	1.39173	0.246617	5.6433	1.66822e-08	4.12415e-07	Upregulated	HW_vs_CW	obesity_upregulated
E2f2	Arhgap11a	TRUE	17	cisbp__M6191	4.51	r80__500bp_up_and_100bp_down_tss.mc9nr.feather	w0.005	0.7	0.00762814	798.367	1.02771	0.276666	3.71463	0.000203501	0.00153584	Upregulated	HW_vs_CW	obesity_upregulated
E2f2	Arrdc4	TRUE	12	cisbp__M6191	4.51	r80__500bp_up_and_100bp_down_tss.mc9nr.feather	w0.005	0.7	0.0113831	2310.68	0.533961	0.139356	3.83163	0.000127298	0.00102629	Upregulated	HW_vs_CW	obesity_upregulated
E2f2	Aspm	TRUE	11	cisbp__M6191	4.51	r80__500bp_up_and_100bp_down_tss.mc9nr.feather	w0.005	0.2	0.0101757	193.927	1.6314	0.398415	4.09472	4.22679e-05	0.000401087	Upregulated	HW_vs_CW	obesity_upregulated
E2f2	Atad5	TRUE	28	cisbp__M6191	4.51	r80__500bp_up_and_100bp_down_tss.mc9nr.feather	w0.005	0.6	0.00688934	256.929	0.721713	0.258022	2.7971	0.00515631	0.0220946	Upregulated	HW_vs_CW	obesity_upregulated
E2f2	Atp6v0a1	TRUE	1	cisbp__M6191	4.51	r80__500bp_up_and_100bp_down_tss.mc9nr.feather	w0.005	0.6	0.00691149	12215.1	1.12709	0.210399	5.3569	8.46605e-08	1.7882e-06	Upregulated	HW_vs_CW	obesity_upregulated
E2f2	B3galt4	TRUE	4	cisbp__M6191	4.51	r80__500bp_up_and_100bp_down_tss.mc9nr.feather	w0.005	0.7	0.00746925	261.519	0.601247	0.183314	3.27987	0.00103854	0.00594553	Upregulated	HW_vs_CW	obesity_upregulated
E2f2	Bend4	TRUE	2	cisbp__M6191	4.51	r80__500bp_up_and_100bp_down_tss.mc9nr.feather	w0.005	0.7	0.0132852	366.988	0.691395	0.180312	3.83443	0.000125855	0.00101873	Upregulated	HW_vs_CW	obesity_upregulated
E2f2	Bmf	TRUE	30	cisbp__M6191	4.51	r80__500bp_up_and_100bp_down_tss.mc9nr.feather	w0.005	0.6	0.00720443	1057.17	0.562653	0.220397	2.55291	0.0106828	0.0396372	Upregulated	HW_vs_CW	obesity_upregulated
E2f2	C2cd5	TRUE	5	cisbp__M6191	4.51	r80__500bp_up_and_100bp_down_tss.mc9nr.feather	w0.005	0.9	0.00577926	1297.07	0.508483	0.145151	3.50313	0.00045982	0.00301173	Upregulated	HW_vs_CW	obesity_upregulated
E2f2	Cachd1	TRUE	3	cisbp__M6191	4.51	r80__500bp_up_and_100bp_down_tss.mc9nr.feather	w0.005	0.7	0.0127193	5115.68	1.18253	0.256578	4.60885	4.04903e-06	5.29001e-05	Upregulated	HW_vs_CW	obesity_upregulated
E2f2	Calm1	TRUE	9	cisbp__M6191	4.51	r80__500bp_up_and_100bp_down_tss.mc9nr.feather	w0.005	0.1	0.0057805	31601.6	0.676199	0.0907191	7.45377	9.07117e-14	6.628e-12	Upregulated	HW_vs_CW	obesity_upregulated
E2f2	Camk1	TRUE	1	cisbp__M6191	4.51	r80__500bp_up_and_100bp_down_tss.mc9nr.feather	w0.005	0.7	0.0104214	5538.05	0.625954	0.175491	3.56687	0.000361267	0.00246271	Upregulated	HW_vs_CW	obesity_upregulated
E2f2	Cav2	TRUE	3	cisbp__M6191	4.51	r80__500bp_up_and_100bp_down_tss.mc9nr.feather	w0.005	0.2	0.00648028	22965.7	1.24939	0.222266	5.62114	1.89706e-08	4.64332e-07	Upregulated	HW_vs_CW	obesity_upregulated
E2f2	Ccdc171	TRUE	5	cisbp__M6191	4.51	r80__500bp_up_and_100bp_down_tss.mc9nr.feather	w0.005	0.9	0.00546954	150.259	0.677554	0.175459	3.86161	0.000112643	0.000929408	Upregulated	HW_vs_CW	obesity_upregulated
E2f2	Cckbr	TRUE	2	cisbp__M6191	4.51	r80__500bp_up_and_100bp_down_tss.mc9nr.feather	w0.005	0.5	0.0110214	13.2292	2.75977	0.789549	3.49537	0.000473399	0.0030853	Upregulated	HW_vs_CW	obesity_upregulated
E2f2	Cdc7	TRUE	11	cisbp__M6191	4.51	r80__500bp_up_and_100bp_down_tss.mc9nr.feather	w0.005	0.6	0.0132728	249.923	0.98069	0.226589	4.32806	1.50429e-05	0.000165329	Upregulated	HW_vs_CW	obesity_upregulated
E2f2	Cdk1	TRUE	26	cisbp__M6191	4.51	r80__500bp_up_and_100bp_down_tss.mc9nr.feather	w0.005	0.6	0.0112987	344.567	1.60868	0.383942	4.18989	2.79086e-05	0.000281915	Upregulated	HW_vs_CW	obesity_upregulated
E2f2	Cenpf	TRUE	1	cisbp__M6191	4.51	r80__500bp_up_and_100bp_down_tss.mc9nr.feather	w0.005	0.1	0.00932837	185.701	1.88901	0.358086	5.27529	1.32545e-07	2.64661e-06	Upregulated	HW_vs_CW	obesity_upregulated
E2f2	Cenph	TRUE	9	cisbp__M6191	4.51	r80__500bp_up_and_100bp_down_tss.mc9nr.feather	w0.005	0.6	0.0056146	29.1249	2.89338	0.597771	4.84028	1.29656e-06	1.9363e-05	Upregulated	HW_vs_CW	obesity_upregulated
E2f2	Cep164	TRUE	4	cisbp__M6191	4.51	r80__500bp_up_and_100bp_down_tss.mc9nr.feather	w0.005	0.4	0.00690319	1423.14	0.83331	0.167072	4.98774	6.10899e-07	1.00432e-05	Upregulated	HW_vs_CW	obesity_upregulated
E2f2	Chaf1b	TRUE	6	cisbp__M6191	4.51	r80__500bp_up_and_100bp_down_tss.mc9nr.feather	w0.005	0.6	0.00749996	111.947	1.28071	0.357804	3.57936	0.000344433	0.00236676	Upregulated	HW_vs_CW	obesity_upregulated
E2f2	Chek1	TRUE	18	cisbp__M6191	4.51	r80__500bp_up_and_100bp_down_tss.mc9nr.feather	w0.005	0.8	0.00561197	72.0013	1.41857	0.274123	5.17495	2.27972e-07	4.20714e-06	Upregulated	HW_vs_CW	obesity_upregulated
E2f2	Chek2	TRUE	18	cisbp__M6191	4.51	r80__500bp_up_and_100bp_down_tss.mc9nr.feather	w0.005	0.9	0.00887832	490.65	1.39687	0.200186	6.97788	2.99671e-12	1.62862e-10	Upregulated	HW_vs_CW	obesity_upregulated
E2f2	Chst14	TRUE	5	cisbp__M6191	4.51	r80__500bp_up_and_100bp_down_tss.mc9nr.feather	w0.005	0.6	0.0148985	805.14	0.794736	0.23174	3.42944	0.000604838	0.00378321	Upregulated	HW_vs_CW	obesity_upregulated
E2f2	Ckap2l	TRUE	7	cisbp__M6191	4.51	r80__500bp_up_and_100bp_down_tss.mc9nr.feather	w0.005	0.2	0.00541742	145.821	1.84973	0.279262	6.62365	3.50447e-11	1.58934e-09	Upregulated	HW_vs_CW	obesity_upregulated
E2f2	Clspn	TRUE	32	cisbp__M6191	4.51	r80__500bp_up_and_100bp_down_tss.mc9nr.feather	w0.005	0.6	0.0090898	104.085	1.54697	0.440423	3.51246	0.00044398	0.00291977	Upregulated	HW_vs_CW	obesity_upregulated
E2f2	Cntrl	TRUE	8	cisbp__M6191	4.51	r80__500bp_up_and_100bp_down_tss.mc9nr.feather	w0.005	0.7	0.00809128	2086.66	0.551397	0.146525	3.76317	0.000167775	0.00130054	Upregulated	HW_vs_CW	obesity_upregulated
E2f2	Coro1c	TRUE	2	cisbp__M6191	4.51	r80__500bp_up_and_100bp_down_tss.mc9nr.feather	w0.005	0.6	0.00618372	7268.57	0.726988	0.196696	3.696	0.00021902	0.00162865	Upregulated	HW_vs_CW	obesity_upregulated
E2f2	Creb3l2	TRUE	12	cisbp__M6191	4.51	r80__500bp_up_and_100bp_down_tss.mc9nr.feather	w0.005	0.4	0.00573333	6430	0.694527	0.215936	3.21635	0.00129832	0.00716653	Upregulated	HW_vs_CW	obesity_upregulated
E2f2	D930048N14Rik	TRUE	8	cisbp__M6191	4.51	r80__500bp_up_and_100bp_down_tss.mc9nr.feather	w0.005	0.7	0.00520925	296.473	0.65275	0.186675	3.49672	0.000471011	0.0030738	Upregulated	HW_vs_CW	obesity_upregulated
E2f2	Dcbld2	TRUE	2	cisbp__M6191	4.51	r80__500bp_up_and_100bp_down_tss.mc9nr.feather	w0.005	0.5	0.00509871	3248.06	0.888452	0.183293	4.84717	1.25234e-06	1.88075e-05	Upregulated	HW_vs_CW	obesity_upregulated
E2f2	Dcp2	TRUE	7	cisbp__M6191	4.51	r80__500bp_up_and_100bp_down_tss.mc9nr.feather	w0.005	0.5	0.00770058	2543.62	0.568336	0.127837	4.44578	8.75719e-06	0.000103761	Upregulated	HW_vs_CW	obesity_upregulated
E2f2	Dgkz	TRUE	3	cisbp__M6191	4.51	r80__500bp_up_and_100bp_down_tss.mc9nr.feather	w0.005	0.3	0.00684943	4729.48	0.66467	0.160071	4.15236	3.29071e-05	0.000325083	Upregulated	HW_vs_CW	obesity_upregulated
E2f2	Dnmt3a	TRUE	2	cisbp__M6191	4.51	r80__500bp_up_and_100bp_down_tss.mc9nr.feather	w0.005	0.6	0.00888209	4380.17	0.979231	0.133088	7.35779	1.86981e-13	1.27169e-11	Upregulated	HW_vs_CW	obesity_upregulated
E2f2	Dpp3	TRUE	7	cisbp__M6191	4.51	r80__500bp_up_and_100bp_down_tss.mc9nr.feather	w0.005	0.4	0.00674726	2955.71	0.552498	0.164017	3.36855	0.000755644	0.00455603	Upregulated	HW_vs_CW	obesity_upregulated
E2f2	Epb41l2	TRUE	8	cisbp__M6191	4.51	r80__500bp_up_and_100bp_down_tss.mc9nr.feather	w0.005	0.6	0.00860745	31156.5	1.38411	0.195319	7.0864	1.37649e-12	7.96343e-11	Upregulated	HW_vs_CW	obesity_upregulated
E2f2	Evi2a	TRUE	1	cisbp__M6191	4.51	r80__500bp_up_and_100bp_down_tss.mc9nr.feather	w0.005	0.5	0.00562535	893.17	1.49302	0.408646	3.65359	0.000258598	0.00186541	Upregulated	HW_vs_CW	obesity_upregulated
E2f2	Exoc4	TRUE	9	cisbp__M6191	4.51	r80__500bp_up_and_100bp_down_tss.mc9nr.feather	w0.005	0.1	0.00520874	4210.66	0.771572	0.11088	6.9586	3.43668e-12	1.8575e-10	Upregulated	HW_vs_CW	obesity_upregulated
E2f2	Fanci	TRUE	7	cisbp__M6191	4.51	r80__500bp_up_and_100bp_down_tss.mc9nr.feather	w0.005	0.7	0.0131754	43.8029	2.02727	0.429709	4.71776	2.38454e-06	3.31751e-05	Upregulated	HW_vs_CW	obesity_upregulated
E2f2	Fbxl15	TRUE	1	cisbp__M6191	4.51	r80__500bp_up_and_100bp_down_tss.mc9nr.feather	w0.005	0.9	0.0136581	227.392	0.629641	0.200568	3.13929	0.00169358	0.00888119	Upregulated	HW_vs_CW	obesity_upregulated
E2f2	Fbxo33	TRUE	9	cisbp__M6191	4.51	r80__500bp_up_and_100bp_down_tss.mc9nr.feather	w0.005	0.7	0.00644928	1210.13	0.568651	0.222336	2.55762	0.010539	0.0392143	Upregulated	HW_vs_CW	obesity_upregulated
E2f2	Fmnl1	TRUE	4	cisbp__M6191	4.51	r80__500bp_up_and_100bp_down_tss.mc9nr.feather	w0.005	0.5	0.00970669	2168.32	0.862328	0.204225	4.22245	2.4166e-05	0.000247919	Upregulated	HW_vs_CW	obesity_upregulated
E2f2	Foxm1	TRUE	8	cisbp__M6191	4.51	r80__500bp_up_and_100bp_down_tss.mc9nr.feather	w0.005	0.6	0.0101857	261.072	0.982617	0.229452	4.28245	1.84843e-05	0.0001969	Upregulated	HW_vs_CW	obesity_upregulated
E2f2	Gin1	TRUE	2	cisbp__M6191	4.51	r80__500bp_up_and_100bp_down_tss.mc9nr.feather	w0.005	0.7	0.00716044	281.524	0.69516	0.184811	3.76147	0.000168916	0.00130835	Upregulated	HW_vs_CW	obesity_upregulated
E2f2	Gins3	TRUE	16	cisbp__M6191	4.51	r80__500bp_up_and_100bp_down_tss.mc9nr.feather	w0.005	0.7	0.00657723	169.09	0.713568	0.21509	3.31753	0.000908159	0.00532743	Upregulated	HW_vs_CW	obesity_upregulated
E2f2	Glcci1	TRUE	2	cisbp__M6191	4.51	r80__500bp_up_and_100bp_down_tss.mc9nr.feather	w0.005	0.5	0.00937403	95.5024	1.20599	0.387827	3.1096	0.00187339	0.00966479	Upregulated	HW_vs_CW	obesity_upregulated
E2f2	Gm5144	TRUE	12	cisbp__M6191	4.51	r80__500bp_up_and_100bp_down_tss.mc9nr.feather	w0.005	0.5	0.00582659	69.2005	2.07726	0.454679	4.56862	4.90939e-06	6.26066e-05	Upregulated	HW_vs_CW	obesity_upregulated
E2f2	Gmfb	TRUE	10	cisbp__M6191	4.51	r80__500bp_up_and_100bp_down_tss.mc9nr.feather	w0.005	0.7	0.0055668	9458.19	0.502391	0.118722	4.23165	2.31984e-05	0.000239989	Upregulated	HW_vs_CW	obesity_upregulated
E2f2	Gna15	TRUE	3	cisbp__M6191	4.51	r80__500bp_up_and_100bp_down_tss.mc9nr.feather	w0.005	0.5	0.00514937	244.89	0.700747	0.269205	2.60303	0.0092405	0.0353151	Upregulated	HW_vs_CW	obesity_upregulated
E2f2	Ifih1	TRUE	3	cisbp__M6191	4.51	r80__500bp_up_and_100bp_down_tss.mc9nr.feather	w0.005	0.8	0.00511738	2413.11	0.577699	0.159716	3.61705	0.000297983	0.00209875	Upregulated	HW_vs_CW	obesity_upregulated
E2f2	Igsf9	TRUE	4	cisbp__M6191	4.51	r80__500bp_up_and_100bp_down_tss.mc9nr.feather	w0.005	0.9	0.0145562	243.128	0.607146	0.21985	2.76164	0.00575118	0.0241044	Upregulated	HW_vs_CW	obesity_upregulated
E2f2	Ikbip	TRUE	6	cisbp__M6191	4.51	r80__500bp_up_and_100bp_down_tss.mc9nr.feather	w0.005	0.4	0.00630443	1815.21	0.859247	0.151394	5.67558	1.38221e-08	3.48698e-07	Upregulated	HW_vs_CW	obesity_upregulated
E2f2	Incenp	TRUE	1	cisbp__M6191	4.51	r80__500bp_up_and_100bp_down_tss.mc9nr.feather	w0.005	0.6	0.00574143	753.902	0.861274	0.259495	3.31904	0.000903274	0.00530509	Upregulated	HW_vs_CW	obesity_upregulated
E2f2	Itga5	TRUE	1	cisbp__M6191	4.51	r80__500bp_up_and_100bp_down_tss.mc9nr.feather	w0.005	0.2	0.00629624	4072.98	0.571801	0.139865	4.08823	4.34674e-05	0.000409711	Upregulated	HW_vs_CW	obesity_upregulated
E2f2	Itgb5	TRUE	1	cisbp__M6191	4.51	r80__500bp_up_and_100bp_down_tss.mc9nr.feather	w0.005	0.4	0.00550281	13472.6	0.653798	0.19327	3.38283	0.000717434	0.00436433	Upregulated	HW_vs_CW	obesity_upregulated
E2f2	Kcna3	TRUE	9	cisbp__M6191	4.51	r80__500bp_up_and_100bp_down_tss.mc9nr.feather	w0.005	0.3	0.00693407	13.9362	2.43938	0.868703	2.80807	0.00498397	0.0214842	Upregulated	HW_vs_CW	obesity_upregulated
E2f2	Kcne1l	TRUE	3	cisbp__M6191	4.51	r80__500bp_up_and_100bp_down_tss.mc9nr.feather	w0.005	0.6	0.00555245	266.885	2.10855	0.40105	5.25756	1.45978e-07	2.88608e-06	Upregulated	HW_vs_CW	obesity_upregulated
E2f2	Kif11	TRUE	14	cisbp__M6191	4.51	r80__500bp_up_and_100bp_down_tss.mc9nr.feather	w0.005	0.7	0.00700222	283.522	1.34989	0.280157	4.81834	1.44758e-06	2.13278e-05	Upregulated	HW_vs_CW	obesity_upregulated
E2f2	Kif18a	TRUE	21	cisbp__M6191	4.51	r80__500bp_up_and_100bp_down_tss.mc9nr.feather	w0.005	0.7	0.0105988	88.7621	1.43609	0.390952	3.67333	0.000239414	0.00175778	Upregulated	HW_vs_CW	obesity_upregulated
E2f2	Kif20a	TRUE	5	cisbp__M6191	4.51	r80__500bp_up_and_100bp_down_tss.mc9nr.feather	w0.005	0.5	0.00520864	215.947	1.34711	0.304398	4.42548	9.62288e-06	0.000112331	Upregulated	HW_vs_CW	obesity_upregulated
E2f2	Kif21b	TRUE	12	cisbp__M6191	4.51	r80__500bp_up_and_100bp_down_tss.mc9nr.feather	w0.005	0.5	0.006623	1311.02	1.33758	0.313807	4.26244	2.02208e-05	0.00021321	Upregulated	HW_vs_CW	obesity_upregulated
E2f2	Kif3b	TRUE	2	cisbp__M6191	4.51	r80__500bp_up_and_100bp_down_tss.mc9nr.feather	w0.005	0.7	0.00533311	3313.68	0.719944	0.131571	5.47193	4.45172e-08	1.0037e-06	Upregulated	HW_vs_CW	obesity_upregulated
E2f2	Klf14	TRUE	3	cisbp__M6191	4.51	r80__500bp_up_and_100bp_down_tss.mc9nr.feather	w0.005	0.1	0.00700157	461.307	2.71956	0.623684	4.36048	1.29776e-05	0.000144973	Upregulated	HW_vs_CW	obesity_upregulated
E2f2	Lasp1	TRUE	3	cisbp__M6191	4.51	r80__500bp_up_and_100bp_down_tss.mc9nr.feather	w0.005	0.5	0.011128	18309	0.610133	0.17979	3.39359	0.000689821	0.00421978	Upregulated	HW_vs_CW	obesity_upregulated
E2f2	Lmnb1	TRUE	5	cisbp__M6191	4.51	r80__500bp_up_and_100bp_down_tss.mc9nr.feather	w0.005	0.7	0.00843728	673.02	0.978508	0.156244	6.26269	3.78386e-10	1.38494e-08	Upregulated	HW_vs_CW	obesity_upregulated
E2f2	Lmo2	TRUE	2	cisbp__M6191	4.51	r80__500bp_up_and_100bp_down_tss.mc9nr.feather	w0.005	0.5	0.00665842	2090.7	0.835825	0.244442	3.41932	0.000627783	0.00390076	Upregulated	HW_vs_CW	obesity_upregulated
E2f2	Lrrn2	TRUE	1	cisbp__M6191	4.51	r80__500bp_up_and_100bp_down_tss.mc9nr.feather	w0.005	0.9	0.00608899	435.411	1.66933	0.265774	6.281	3.36401e-10	1.24279e-08	Upregulated	HW_vs_CW	obesity_upregulated
E2f2	Lypd1	TRUE	9	cisbp__M6191	4.51	r80__500bp_up_and_100bp_down_tss.mc9nr.feather	w0.005	0.9	0.0107013	61.6998	1.77056	0.390583	4.53311	5.81203e-06	7.26614e-05	Upregulated	HW_vs_CW	obesity_upregulated
E2f2	Map7	TRUE	2	cisbp__M6191	4.51	r80__500bp_up_and_100bp_down_tss.mc9nr.feather	w0.005	0.4	0.00510667	994.296	0.761171	0.22816	3.33613	0.000849545	0.00501941	Upregulated	HW_vs_CW	obesity_upregulated
E2f2	Mmd	TRUE	1	cisbp__M6191	4.51	r80__500bp_up_and_100bp_down_tss.mc9nr.feather	w0.005	0.5	0.00560276	41366.8	0.906448	0.240512	3.76883	0.000164013	0.00127588	Upregulated	HW_vs_CW	obesity_upregulated
E2f2	Mtss1	TRUE	10	cisbp__M6191	4.51	r80__500bp_up_and_100bp_down_tss.mc9nr.feather	w0.005	0.7	0.00798261	4349.7	0.608842	0.111096	5.48032	4.24546e-08	9.64912e-07	Upregulated	HW_vs_CW	obesity_upregulated
E2f2	Mvk	TRUE	4	cisbp__M6191	4.51	r80__500bp_up_and_100bp_down_tss.mc9nr.feather	w0.005	0.3	0.00635856	1130.23	0.93305	0.156275	5.97057	2.36427e-09	7.14276e-08	Upregulated	HW_vs_CW	obesity_upregulated
E2f2	Ncapg	TRUE	10	cisbp__M6191	4.51	r80__500bp_up_and_100bp_down_tss.mc9nr.feather	w0.005	0.7	0.00694655	87.3334	1.71843	0.36377	4.72395	2.31303e-06	3.22257e-05	Upregulated	HW_vs_CW	obesity_upregulated
E2f2	Ndnf	TRUE	7	cisbp__M6191	4.51	r80__500bp_up_and_100bp_down_tss.mc9nr.feather	w0.005	0.5	0.00929201	242.884	1.55427	0.498104	3.12037	0.00180622	0.00937466	Upregulated	HW_vs_CW	obesity_upregulated
E2f2	Nedd4l	TRUE	2	cisbp__M6191	4.51	r80__500bp_up_and_100bp_down_tss.mc9nr.feather	w0.005	0.5	0.00673987	3376.57	0.668336	0.18693	3.57532	0.000349802	0.00239531	Upregulated	HW_vs_CW	obesity_upregulated
E2f2	Nid2	TRUE	5	cisbp__M6191	4.51	r80__500bp_up_and_100bp_down_tss.mc9nr.feather	w0.005	0.2	0.00899491	4934.95	0.953022	0.274978	3.46581	0.000528631	0.00337612	Upregulated	HW_vs_CW	obesity_upregulated
E2f2	Nlrx1	TRUE	1	cisbp__M6191	4.51	r80__500bp_up_and_100bp_down_tss.mc9nr.feather	w0.005	0.1	0.00645862	1206.83	0.631538	0.174116	3.62712	0.000286597	0.00203089	Upregulated	HW_vs_CW	obesity_upregulated
E2f2	Nos1ap	TRUE	3	cisbp__M6191	4.51	r80__500bp_up_and_100bp_down_tss.mc9nr.feather	w0.005	0.6	0.00786614	235.332	1.35286	0.243214	5.56242	2.66064e-08	6.33162e-07	Upregulated	HW_vs_CW	obesity_upregulated
E2f2	Npr3	TRUE	29	cisbp__M6191	4.51	r80__500bp_up_and_100bp_down_tss.mc9nr.feather	w0.005	0.2	0.00606321	47961.2	2.69631	0.366478	7.35736	1.87581e-13	1.27169e-11	Upregulated	HW_vs_CW	obesity_upregulated
E2f2	Nptx1	TRUE	3	cisbp__M6191	4.51	r80__500bp_up_and_100bp_down_tss.mc9nr.feather	w0.005	0.7	0.00698797	73.63	3.72643	1.31003	2.84455	0.00444748	0.0196374	Upregulated	HW_vs_CW	obesity_upregulated
E2f2	Nrep	TRUE	5	cisbp__M6191	4.51	r80__500bp_up_and_100bp_down_tss.mc9nr.feather	w0.005	0.1	0.00558114	2319.31	1.81982	0.241798	7.52618	5.22457e-14	3.97955e-12	Upregulated	HW_vs_CW	obesity_upregulated
E2f2	Nubp1	TRUE	20	cisbp__M6191	4.51	r80__500bp_up_and_100bp_down_tss.mc9nr.feather	w0.005	0.6	0.00879821	505.59	0.596698	0.205099	2.90932	0.00362212	0.0166133	Upregulated	HW_vs_CW	obesity_upregulated
E2f2	Olfm1	TRUE	14	cisbp__M6191	4.51	r80__500bp_up_and_100bp_down_tss.mc9nr.feather	w0.005	0.7	0.00699484	4194.29	2.00828	0.22078	9.09629	9.34703e-20	1.82572e-17	Upregulated	HW_vs_CW	obesity_upregulated
E2f2	Ostf1	TRUE	1	cisbp__M6191	4.51	r80__500bp_up_and_100bp_down_tss.mc9nr.feather	w0.005	0.6	0.00944383	5639.29	0.702235	0.156247	4.49439	6.97707e-06	8.54399e-05	Upregulated	HW_vs_CW	obesity_upregulated
E2f2	Palld	TRUE	9	cisbp__M6191	4.51	r80__500bp_up_and_100bp_down_tss.mc9nr.feather	w0.005	0.2	0.00791617	7069.25	0.845795	0.215968	3.91629	8.99217e-05	0.000763986	Upregulated	HW_vs_CW	obesity_upregulated
E2f2	Pask	TRUE	17	cisbp__M6191	4.51	r80__500bp_up_and_100bp_down_tss.mc9nr.feather	w0.005	0.4	0.00795655	147.62	0.667956	0.197333	3.38492	0.000711995	0.00433526	Upregulated	HW_vs_CW	obesity_upregulated
E2f2	Pcyox1	TRUE	1	cisbp__M6191	4.51	r80__500bp_up_and_100bp_down_tss.mc9nr.feather	w0.005	0.6	0.00640298	13471.8	0.585283	0.160404	3.64879	0.000263473	0.00189217	Upregulated	HW_vs_CW	obesity_upregulated
E2f2	Pde7a	TRUE	8	cisbp__M6191	4.51	r80__500bp_up_and_100bp_down_tss.mc9nr.feather	w0.005	0.2	0.00755706	3839.71	1.20157	0.246915	4.86635	1.13679e-06	1.7238e-05	Upregulated	HW_vs_CW	obesity_upregulated
E2f2	Pianp	TRUE	6	cisbp__M6191	4.51	r80__500bp_up_and_100bp_down_tss.mc9nr.feather	w0.005	0.5	0.0108132	532.126	2.42388	0.454612	5.33175	9.72715e-08	2.02423e-06	Upregulated	HW_vs_CW	obesity_upregulated
E2f2	Pip4k2a	TRUE	1	cisbp__M6191	4.51	r80__500bp_up_and_100bp_down_tss.mc9nr.feather	w0.005	0.6	0.00730403	2852.07	0.986032	0.205397	4.80061	1.58186e-06	2.2976e-05	Upregulated	HW_vs_CW	obesity_upregulated
E2f2	Plekho2	TRUE	9	cisbp__M6191	4.51	r80__500bp_up_and_100bp_down_tss.mc9nr.feather	w0.005	0.6	0.0082584	4914.12	0.849224	0.268044	3.16822	0.00153375	0.00821998	Upregulated	HW_vs_CW	obesity_upregulated
E2f2	Pou2f2	TRUE	2	cisbp__M6191	4.51	r80__500bp_up_and_100bp_down_tss.mc9nr.feather	w0.005	0.6	0.00821603	189.171	0.830154	0.322703	2.57251	0.0100965	0.0379034	Upregulated	HW_vs_CW	obesity_upregulated
E2f2	Ppip5k2	TRUE	2	cisbp__M6191	4.51	r80__500bp_up_and_100bp_down_tss.mc9nr.feather	w0.005	0.7	0.00805106	1469.85	0.818683	0.154294	5.306	1.12056e-07	2.27501e-06	Upregulated	HW_vs_CW	obesity_upregulated
E2f2	Ppp1r35	TRUE	4	cisbp__M6191	4.51	r80__500bp_up_and_100bp_down_tss.mc9nr.feather	w0.005	0.6	0.00606491	405.092	0.531333	0.144485	3.67742	0.000235607	0.00173306	Upregulated	HW_vs_CW	obesity_upregulated
E2f2	Pqlc3	TRUE	1	cisbp__M6191	4.51	r80__500bp_up_and_100bp_down_tss.mc9nr.feather	w0.005	0.5	0.00626308	2691.94	1.55266	0.232262	6.68493	2.31035e-11	1.09828e-09	Upregulated	HW_vs_CW	obesity_upregulated
E2f2	Prc1	TRUE	2	cisbp__M6191	4.51	r80__500bp_up_and_100bp_down_tss.mc9nr.feather	w0.005	0.6	0.00730919	280.797	1.6891	0.261176	6.46731	9.97654e-11	4.16219e-09	Upregulated	HW_vs_CW	obesity_upregulated
E2f2	Prdm1	TRUE	10	cisbp__M6191	4.51	r80__500bp_up_and_100bp_down_tss.mc9nr.feather	w0.005	0.6	0.00711468	201.886	0.922945	0.369086	2.50062	0.0123975	0.0445902	Upregulated	HW_vs_CW	obesity_upregulated
E2f2	Prrg1	TRUE	3	cisbp__M6191	4.51	r80__500bp_up_and_100bp_down_tss.mc9nr.feather	w0.005	0.1	0.00511855	690.036	0.815982	0.204754	3.98518	6.74301e-05	0.000595995	Upregulated	HW_vs_CW	obesity_upregulated
E2f2	Psat1	TRUE	15	cisbp__M6191	4.51	r80__500bp_up_and_100bp_down_tss.mc9nr.feather	w0.005	0.7	0.00527522	9530.68	0.981226	0.230271	4.26117	2.03361e-05	0.000214312	Upregulated	HW_vs_CW	obesity_upregulated
E2f2	Psd2	TRUE	1	cisbp__M6191	4.51	r80__500bp_up_and_100bp_down_tss.mc9nr.feather	w0.005	0.8	0.00734163	36.4333	1.00502	0.349989	2.87157	0.00408444	0.0183507	Upregulated	HW_vs_CW	obesity_upregulated
E2f2	Rad50	TRUE	5	cisbp__M6191	4.51	r80__500bp_up_and_100bp_down_tss.mc9nr.feather	w0.005	0.4	0.00655609	3111.03	1.48137	0.216462	6.84355	7.72528e-12	3.91785e-10	Upregulated	HW_vs_CW	obesity_upregulated
E2f2	Rara	TRUE	2	cisbp__M6191	4.51	r80__500bp_up_and_100bp_down_tss.mc9nr.feather	w0.005	0.3	0.00601085	1347.23	0.580577	0.13658	4.25084	2.12972e-05	0.00022301	Upregulated	HW_vs_CW	obesity_upregulated
E2f2	Rel	TRUE	11	cisbp__M6191	4.51	r80__500bp_up_and_100bp_down_tss.mc9nr.feather	w0.005	0.7	0.00603778	870.514	0.537063	0.184515	2.91067	0.00360656	0.016555	Upregulated	HW_vs_CW	obesity_upregulated
E2f2	Rock2	TRUE	1	cisbp__M6191	4.51	r80__500bp_up_and_100bp_down_tss.mc9nr.feather	w0.005	0.3	0.00988146	17341.2	0.579924	0.138281	4.19382	2.74293e-05	0.000277902	Upregulated	HW_vs_CW	obesity_upregulated
E2f2	S1pr2	TRUE	3	cisbp__M6191	4.51	r80__500bp_up_and_100bp_down_tss.mc9nr.feather	w0.005	0.6	0.00640515	981.389	1.15686	0.292449	3.95578	7.62845e-05	0.000663846	Upregulated	HW_vs_CW	obesity_upregulated
E2f2	Sass6	TRUE	20	cisbp__M6191	4.51	r80__500bp_up_and_100bp_down_tss.mc9nr.feather	w0.005	0.7	0.00655914	126.123	0.842363	0.27384	3.07612	0.00209716	0.0106084	Upregulated	HW_vs_CW	obesity_upregulated
E2f2	Sbk1	TRUE	4	cisbp__M6191	4.51	r80__500bp_up_and_100bp_down_tss.mc9nr.feather	w0.005	0.4	0.0081824	1766.55	0.719553	0.184281	3.90466	9.43586e-05	0.00079756	Upregulated	HW_vs_CW	obesity_upregulated
E2f2	Spats2	TRUE	7	cisbp__M6191	4.51	r80__500bp_up_and_100bp_down_tss.mc9nr.feather	w0.005	0.3	0.00921543	1338.6	0.527531	0.120661	4.37201	1.2311e-05	0.000137996	Upregulated	HW_vs_CW	obesity_upregulated
E2f2	Spdl1	TRUE	11	cisbp__M6191	4.51	r80__500bp_up_and_100bp_down_tss.mc9nr.feather	w0.005	0.7	0.00713367	104.839	2.1526	0.415912	5.17561	2.27164e-07	4.19615e-06	Upregulated	HW_vs_CW	obesity_upregulated
E2f2	Src	TRUE	1	cisbp__M6191	4.51	r80__500bp_up_and_100bp_down_tss.mc9nr.feather	w0.005	0.7	0.0119425	1374.86	0.764924	0.144653	5.288	1.23662e-07	2.48685e-06	Upregulated	HW_vs_CW	obesity_upregulated
E2f2	Stil	TRUE	10	cisbp__M6191	4.51	r80__500bp_up_and_100bp_down_tss.mc9nr.feather	w0.005	0.7	0.00636073	71.6086	2.12058	0.426328	4.97406	6.55641e-07	1.06194e-05	Upregulated	HW_vs_CW	obesity_upregulated
E2f2	Tcf19	TRUE	8	cisbp__M6191	4.51	r80__500bp_up_and_100bp_down_tss.mc9nr.feather	w0.005	0.4	0.00589519	269.274	1.16634	0.177747	6.56178	5.31701e-11	2.34662e-09	Upregulated	HW_vs_CW	obesity_upregulated
E2f2	Tenm4	TRUE	15	cisbp__M6191	4.51	r80__500bp_up_and_100bp_down_tss.mc9nr.feather	w0.005	0.7	0.0129726	13755.5	1.91131	0.292784	6.52806	6.66263e-11	2.88246e-09	Upregulated	HW_vs_CW	obesity_upregulated
E2f2	Tet3	TRUE	7	cisbp__M6191	4.51	r80__500bp_up_and_100bp_down_tss.mc9nr.feather	w0.005	0.9	0.00660404	5667.6	0.786153	0.182666	4.30377	1.67915e-05	0.000181216	Upregulated	HW_vs_CW	obesity_upregulated
E2f2	Timeless	TRUE	6	cisbp__M6191	4.51	r80__500bp_up_and_100bp_down_tss.mc9nr.feather	w0.005	0.7	0.00933429	784.275	1.04897	0.154847	6.77426	1.25047e-11	6.2139e-10	Upregulated	HW_vs_CW	obesity_upregulated
E2f2	Tmem158	TRUE	4	cisbp__M6191	4.51	r80__500bp_up_and_100bp_down_tss.mc9nr.feather	w0.005	0.5	0.00585971	238.844	1.02879	0.265129	3.88035	0.000104304	0.000870069	Upregulated	HW_vs_CW	obesity_upregulated
E2f2	Tmem263	TRUE	1	cisbp__M6191	4.51	r80__500bp_up_and_100bp_down_tss.mc9nr.feather	w0.005	0.4	0.00879239	1415.68	0.627727	0.117816	5.32804	9.92789e-08	2.05567e-06	Upregulated	HW_vs_CW	obesity_upregulated
E2f2	Trim59	TRUE	7	cisbp__M6191	4.51	r80__500bp_up_and_100bp_down_tss.mc9nr.feather	w0.005	0.9	0.00703102	153.412	1.2061	0.264955	4.5521	5.31141e-06	6.69971e-05	Upregulated	HW_vs_CW	obesity_upregulated
E2f2	Tsc22d2	TRUE	3	cisbp__M6191	4.51	r80__500bp_up_and_100bp_down_tss.mc9nr.feather	w0.005	0.6	0.0097772	4842.27	1.31449	0.273455	4.80698	1.53228e-06	2.24083e-05	Upregulated	HW_vs_CW	obesity_upregulated
E2f2	Ttk	TRUE	2	cisbp__M6191	4.51	r80__500bp_up_and_100bp_down_tss.mc9nr.feather	w0.005	0.7	0.00546864	51.8106	2.30161	0.622562	3.697	0.00021816	0.0016241	Upregulated	HW_vs_CW	obesity_upregulated
E2f2	Tuba1a	TRUE	4	cisbp__M6191	4.51	r80__500bp_up_and_100bp_down_tss.mc9nr.feather	w0.005	0.1	0.00702033	13739.1	1.6504	0.271362	6.08189	1.18771e-09	3.87293e-08	Upregulated	HW_vs_CW	obesity_upregulated
E2f2	Twf2	TRUE	6	cisbp__M6191	4.51	r80__500bp_up_and_100bp_down_tss.mc9nr.feather	w0.005	0.1	0.00638774	1826.94	0.738532	0.18238	4.04942	5.13444e-05	0.000471127	Upregulated	HW_vs_CW	obesity_upregulated
E2f2	Vac14	TRUE	1	cisbp__M6191	4.51	r80__500bp_up_and_100bp_down_tss.mc9nr.feather	w0.005	0.7	0.00542443	3299.23	0.826951	0.14129	5.85285	4.8323e-09	1.36188e-07	Upregulated	HW_vs_CW	obesity_upregulated
E2f2	Vat1	TRUE	8	cisbp__M6191	4.51	r80__500bp_up_and_100bp_down_tss.mc9nr.feather	w0.005	0.5	0.00577714	13594.2	0.757924	0.204368	3.70863	0.000208386	0.00156432	Upregulated	HW_vs_CW	obesity_upregulated
E2f2	Wdr76	TRUE	9	cisbp__M6191	4.51	r80__500bp_up_and_100bp_down_tss.mc9nr.feather	w0.005	0.7	0.00717714	331.69	0.556497	0.207048	2.68777	0.00719304	0.0288189	Upregulated	HW_vs_CW	obesity_upregulated
E2f2	Xrcc2	TRUE	4	cisbp__M6191	4.51	r80__500bp_up_and_100bp_down_tss.mc9nr.feather	w0.005	0.7	0.00660132	563.901	0.581188	0.152189	3.81886	0.000134068	0.00107298	Upregulated	HW_vs_CW	obesity_upregulated
E2f2	Zeb2	TRUE	9	cisbp__M6191	4.51	r80__500bp_up_and_100bp_down_tss.mc9nr.feather	w0.005	0.6	0.00842333	13623.4	0.849766	0.225525	3.76795	0.000164592	0.00127938	Upregulated	HW_vs_CW	obesity_upregulated
E2f2	Zfp423	TRUE	4	cisbp__M6191	4.51	r80__500bp_up_and_100bp_down_tss.mc9nr.feather	w0.005	0.9	0.0101218	3672.15	0.620015	0.242983	2.55168	0.0107206	0.0397251	Upregulated	HW_vs_CW	obesity_upregulated
E2f2	Zfp710	TRUE	2	cisbp__M6191	4.51	r80__500bp_up_and_100bp_down_tss.mc9nr.feather	w0.005	0.6	0.00851948	1785.98	0.835706	0.193942	4.30906	1.63948e-05	0.000177575	Upregulated	HW_vs_CW	obesity_upregulated
E2f2	Zwilch	TRUE	13	cisbp__M6191	4.51	r80__500bp_up_and_100bp_down_tss.mc9nr.feather	w0.005	0.7	0.00795915	149.743	1.48011	0.26275	5.63314	1.76956e-08	4.35828e-07	Upregulated	HW_vs_CW	obesity_upregulated
E2f2	Polq	TRUE	3	transfac_pro__M08875	4.46	r80__500bp_up_and_100bp_down_tss.mc9nr.feather	top10perTarget	0.6	0.0145195	77.6956	1.40082	0.342247	4.093	4.2582e-05	0.00040259	Upregulated	HW_vs_CW	obesity_upregulated
E2f2	Tomt	TRUE	5	transfac_pro__M08875	4.46	r80__500bp_up_and_100bp_down_tss.mc9nr.feather	top10perTarget	0.9	0.0168298	26.0707	1.16819	0.372882	3.13288	0.00173102	0.00904863	Upregulated	HW_vs_CW	obesity_upregulated
E2f2	Cdt1	TRUE	7	swissregulon__hs__E2F1..5.p2	3.81	r80__500bp_up_and_100bp_down_tss.mc9nr.feather	w0.001	0.6	0.00467511	326.286	1.08588	0.283079	3.83595	0.000125079	0.00101379	Upregulated	HW_vs_CW	obesity_upregulated
E2f2	Cntln	TRUE	6	swissregulon__hs__E2F1..5.p2	3.81	r80__500bp_up_and_100bp_down_tss.mc9nr.feather	w0.001	0.4	0.00325084	1519.62	0.653437	0.188018	3.47539	0.000510116	0.0032727	Upregulated	HW_vs_CW	obesity_upregulated
E2f2	Dbp	TRUE	7	swissregulon__hs__E2F1..5.p2	3.81	r80__500bp_up_and_100bp_down_tss.mc9nr.feather	w0.001	0.3	0.00281543	3093.23	4.51913	0.221496	20.4028	1.57972e-92	1.03882e-88	Upregulated	HW_vs_CW	obesity_upregulated
E2f2	Ier5l	TRUE	7	swissregulon__hs__E2F1..5.p2	3.81	r80__500bp_up_and_100bp_down_tss.mc9nr.feather	w0.001	0.7	0.00322553	460.155	0.830753	0.270605	3.06998	0.00214075	0.0107847	Upregulated	HW_vs_CW	obesity_upregulated
E2f2	Kif15	TRUE	7	swissregulon__hs__E2F1..5.p2	3.81	r80__500bp_up_and_100bp_down_tss.mc9nr.feather	w0.001	0.5	0.00392506	100.323	1.20301	0.441855	2.72263	0.00647644	0.0264912	Upregulated	HW_vs_CW	obesity_upregulated
E2f2	Mbnl3	TRUE	7	swissregulon__hs__E2F1..5.p2	3.81	r80__500bp_up_and_100bp_down_tss.mc9nr.feather	w0.001	0.7	0.00275293	364.986	1.31628	0.273579	4.81132	1.49934e-06	2.19592e-05	Upregulated	HW_vs_CW	obesity_upregulated
E2f2	Mcm2	TRUE	7	swissregulon__hs__E2F1..5.p2	3.81	r80__500bp_up_and_100bp_down_tss.mc9nr.feather	w0.001	0.4	0.00290279	712.777	1.36966	0.315934	4.33526	1.45586e-05	0.000160454	Upregulated	HW_vs_CW	obesity_upregulated
E2f2	Mki67	TRUE	6	swissregulon__hs__E2F1..5.p2	3.81	r80__500bp_up_and_100bp_down_tss.mc9nr.feather	w0.001	0.5	0.00337523	1260.85	2.0237	0.29865	6.77614	1.23429e-11	6.14903e-10	Upregulated	HW_vs_CW	obesity_upregulated
E2f2	Paqr4	TRUE	7	swissregulon__hs__E2F1..5.p2	3.81	r80__500bp_up_and_100bp_down_tss.mc9nr.feather	w0.001	0.3	0.00206324	1808.67	0.959348	0.193565	4.95622	7.18793e-07	1.1445e-05	Upregulated	HW_vs_CW	obesity_upregulated
E2f2	Pclaf	TRUE	7	swissregulon__hs__E2F1..5.p2	3.81	r80__500bp_up_and_100bp_down_tss.mc9nr.feather	w0.001	0.2	0.00235563	162.962	2.55676	0.300806	8.49969	1.90102e-17	2.53401e-15	Upregulated	HW_vs_CW	obesity_upregulated
E2f2	Pde4b	TRUE	5	swissregulon__hs__E2F1..5.p2	3.81	r80__500bp_up_and_100bp_down_tss.mc9nr.feather	w0.001	0.1	0.00394363	2165.25	0.584982	0.191159	3.06018	0.00221205	0.0110872	Upregulated	HW_vs_CW	obesity_upregulated
E2f2	Peg10	TRUE	7	swissregulon__hs__E2F1..5.p2	3.81	r80__500bp_up_and_100bp_down_tss.mc9nr.feather	w0.001	0.7	0.00435823	5442.65	3.47012	0.872792	3.97588	7.01188e-05	0.000617547	Upregulated	HW_vs_CW	obesity_upregulated
E2f2	Pole	TRUE	7	swissregulon__hs__E2F1..5.p2	3.81	r80__500bp_up_and_100bp_down_tss.mc9nr.feather	w0.001	0.5	0.00485516	284.26	1.38968	0.293075	4.7417	2.1193e-06	2.99067e-05	Upregulated	HW_vs_CW	obesity_upregulated
E2f2	Rfc3	TRUE	7	swissregulon__hs__E2F1..5.p2	3.81	r80__500bp_up_and_100bp_down_tss.mc9nr.feather	w0.001	0.7	0.00461688	349.374	0.651626	0.18686	3.48724	0.000488038	0.00315679	Upregulated	HW_vs_CW	obesity_upregulated
E2f2	Uhrf1	TRUE	7	swissregulon__hs__E2F1..5.p2	3.81	r80__500bp_up_and_100bp_down_tss.mc9nr.feather	w0.001	0.5	0.00116189	363.147	1.68097	0.242581	6.92955	4.22175e-12	2.23289e-10	Upregulated	HW_vs_CW	obesity_upregulated
E2f2	Wdr62	TRUE	5	swissregulon__hs__E2F1..5.p2	3.81	r80__500bp_up_and_100bp_down_tss.mc9nr.feather	w0.001	0.2	0.00402125	1107.38	0.691034	0.243053	2.84315	0.00446704	0.0197193	Upregulated	HW_vs_CW	obesity_upregulated
E2f2	Nmral1	TRUE	4	taipale__E2F2_DBD_NNTTTTGGCGCCAAAANN	3.75	r80__500bp_up_and_100bp_down_tss.mc9nr.feather	top10perTarget	0.7	0.0149378	405.905	1.10016	0.151693	7.2525	4.09141e-13	2.59535e-11	Upregulated	HW_vs_CW	obesity_upregulated
E2f2	Ajuba	TRUE	2	taipale_cyt_meth__E2F2_NWTTTGGCGCCAWWWN_eDBD_repr	3.69	r80__500bp_up_and_100bp_down_tss.mc9nr.feather	w0.005	0.7	0.00593449	1581.67	0.855571	0.281877	3.03527	0.00240324	0.0118528	Upregulated	HW_vs_CW	obesity_upregulated
E2f2	Amigo3	TRUE	2	taipale_cyt_meth__E2F2_NWTTTGGCGCCAWWWN_eDBD_repr	3.69	r80__500bp_up_and_100bp_down_tss.mc9nr.feather	w0.005	0.5	0.00558913	169.387	0.98838	0.24418	4.04775	5.17128e-05	0.000472967	Upregulated	HW_vs_CW	obesity_upregulated
E2f2	Ankrd42	TRUE	6	taipale_cyt_meth__E2F2_NWTTTGGCGCCAWWWN_eDBD_repr	3.69	r80__500bp_up_and_100bp_down_tss.mc9nr.feather	w0.005	0.9	0.0123213	360.522	0.818866	0.129157	6.34008	2.29651e-10	8.93601e-09	Upregulated	HW_vs_CW	obesity_upregulated
E2f2	Atf3	TRUE	11	taipale_cyt_meth__E2F2_NWTTTGGCGCCAWWWN_eDBD_repr	3.69	r80__500bp_up_and_100bp_down_tss.mc9nr.feather	w0.005	0.5	0.0119946	2915.79	2.45989	0.210676	11.6762	1.68758e-31	1.3317e-28	Upregulated	HW_vs_CW	obesity_upregulated
E2f2	B3glct	TRUE	2	taipale_cyt_meth__E2F2_NWTTTGGCGCCAWWWN_eDBD_repr	3.69	r80__500bp_up_and_100bp_down_tss.mc9nr.feather	w0.005	0.4	0.00783588	2016.56	0.552305	0.198936	2.77629	0.00549824	0.0232617	Upregulated	HW_vs_CW	obesity_upregulated
E2f2	Bard1	TRUE	7	taipale_cyt_meth__E2F2_NWTTTGGCGCCAWWWN_eDBD_repr	3.69	r80__500bp_up_and_100bp_down_tss.mc9nr.feather	w0.005	0.820783	0.00922637	61.8934	1.48042	0.368202	4.02067	5.80337e-05	0.000523259	Upregulated	HW_vs_CW	obesity_upregulated
E2f2	Camk1d	TRUE	11	taipale_cyt_meth__E2F2_NWTTTGGCGCCAWWWN_eDBD_repr	3.69	r80__500bp_up_and_100bp_down_tss.mc9nr.feather	w0.005	0.5	0.0116877	1353.73	0.873997	0.257001	3.40075	0.00067202	0.0041301	Upregulated	HW_vs_CW	obesity_upregulated
E2f2	Ccna2	TRUE	5	taipale_cyt_meth__E2F2_NWTTTGGCGCCAWWWN_eDBD_repr	3.69	r80__500bp_up_and_100bp_down_tss.mc9nr.feather	w0.005	0.5	0.00554589	258.89	1.77272	0.359855	4.92619	8.38465e-07	1.31384e-05	Upregulated	HW_vs_CW	obesity_upregulated
E2f2	Ccser2	TRUE	5	taipale_cyt_meth__E2F2_NWTTTGGCGCCAWWWN_eDBD_repr	3.69	r80__500bp_up_and_100bp_down_tss.mc9nr.feather	w0.005	0.6	0.00688824	10146	0.701635	0.131907	5.31918	1.04235e-07	2.13758e-06	Upregulated	HW_vs_CW	obesity_upregulated
E2f2	Cdc25c	TRUE	2	taipale_cyt_meth__E2F2_NWTTTGGCGCCAWWWN_eDBD_repr	3.69	r80__500bp_up_and_100bp_down_tss.mc9nr.feather	w0.005	0.5	0.00615533	20.5257	2.7785	0.671411	4.13831	3.49879e-05	0.000341535	Upregulated	HW_vs_CW	obesity_upregulated
E2f2	Cdca8	TRUE	2	taipale_cyt_meth__E2F2_NWTTTGGCGCCAWWWN_eDBD_repr	3.69	r80__500bp_up_and_100bp_down_tss.mc9nr.feather	w0.005	0.7	0.00865317	203.448	2.08566	0.275762	7.56325	3.93136e-14	3.05346e-12	Upregulated	HW_vs_CW	obesity_upregulated
E2f2	Cdkn2b	TRUE	1	taipale_cyt_meth__E2F2_NWTTTGGCGCCAWWWN_eDBD_repr	3.69	r80__500bp_up_and_100bp_down_tss.mc9nr.feather	w0.005	0.7	0.0120289	385.822	0.886368	0.169199	5.23861	1.61793e-07	3.15401e-06	Upregulated	HW_vs_CW	obesity_upregulated
E2f2	Cdr2	TRUE	1	taipale_cyt_meth__E2F2_NWTTTGGCGCCAWWWN_eDBD_repr	3.69	r80__500bp_up_and_100bp_down_tss.mc9nr.feather	w0.005	0.5	0.00883441	4093.82	1.44575	0.245391	5.89162	3.82436e-09	1.10788e-07	Upregulated	HW_vs_CW	obesity_upregulated
E2f2	D430019H16Rik	TRUE	4	taipale_cyt_meth__E2F2_NWTTTGGCGCCAWWWN_eDBD_repr	3.69	r80__500bp_up_and_100bp_down_tss.mc9nr.feather	w0.005	0.7	0.0064587	2249.55	3.21258	0.557172	5.76587	8.12375e-09	2.15878e-07	Upregulated	HW_vs_CW	obesity_upregulated
E2f2	Daam1	TRUE	10	taipale_cyt_meth__E2F2_NWTTTGGCGCCAWWWN_eDBD_repr	3.69	r80__500bp_up_and_100bp_down_tss.mc9nr.feather	w0.005	0.7	0.00968885	3486.85	0.546531	0.105425	5.18408	2.17089e-07	4.04412e-06	Upregulated	HW_vs_CW	obesity_upregulated
E2f2	Diras2	TRUE	6	taipale_cyt_meth__E2F2_NWTTTGGCGCCAWWWN_eDBD_repr	3.69	r80__500bp_up_and_100bp_down_tss.mc9nr.feather	w0.005	0.6	0.00707316	319.469	1.36713	0.35524	3.84848	0.000118854	0.000970507	Upregulated	HW_vs_CW	obesity_upregulated
E2f2	Dph6	TRUE	3	taipale_cyt_meth__E2F2_NWTTTGGCGCCAWWWN_eDBD_repr	3.69	r80__500bp_up_and_100bp_down_tss.mc9nr.feather	w0.005	0.7	0.00508568	747.337	0.501937	0.184596	2.71911	0.00654569	0.026708	Upregulated	HW_vs_CW	obesity_upregulated
E2f2	E130018N17Rik	TRUE	2	taipale_cyt_meth__E2F2_NWTTTGGCGCCAWWWN_eDBD_repr	3.69	r80__500bp_up_and_100bp_down_tss.mc9nr.feather	w0.005	0.5	0.00690695	18.1723	3.24247	0.85486	3.79299	0.000148844	0.00117409	Upregulated	HW_vs_CW	obesity_upregulated
E2f2	Elmo1	TRUE	10	taipale_cyt_meth__E2F2_NWTTTGGCGCCAWWWN_eDBD_repr	3.69	r80__500bp_up_and_100bp_down_tss.mc9nr.feather	w0.005	0.7	0.00739024	1983.04	0.702025	0.103273	6.79774	1.06275e-11	5.33482e-10	Upregulated	HW_vs_CW	obesity_upregulated
E2f2	Endod1	TRUE	6	taipale_cyt_meth__E2F2_NWTTTGGCGCCAWWWN_eDBD_repr	3.69	r80__500bp_up_and_100bp_down_tss.mc9nr.feather	w0.005	0.6	0.00635997	2648.55	0.631088	0.207526	3.04101	0.00235786	0.0116669	Upregulated	HW_vs_CW	obesity_upregulated
E2f2	Ephb1	TRUE	5	taipale_cyt_meth__E2F2_NWTTTGGCGCCAWWWN_eDBD_repr	3.69	r80__500bp_up_and_100bp_down_tss.mc9nr.feather	w0.005	0.7	0.00728928	210.709	1.50339	0.342366	4.39118	1.12737e-05	0.000128337	Upregulated	HW_vs_CW	obesity_upregulated
E2f2	Exoc3l	TRUE	2	taipale_cyt_meth__E2F2_NWTTTGGCGCCAWWWN_eDBD_repr	3.69	r80__500bp_up_and_100bp_down_tss.mc9nr.feather	w0.005	0.7	0.00695319	447.908	0.887977	0.211578	4.19693	2.7056e-05	0.000274709	Upregulated	HW_vs_CW	obesity_upregulated
E2f2	Fabp5	TRUE	2	taipale_cyt_meth__E2F2_NWTTTGGCGCCAWWWN_eDBD_repr	3.69	r80__500bp_up_and_100bp_down_tss.mc9nr.feather	w0.005	0.7	0.00590375	24702.3	1.05866	0.256415	4.12868	3.6485e-05	0.000354395	Upregulated	HW_vs_CW	obesity_upregulated
E2f2	Fam122b	TRUE	14	taipale_cyt_meth__E2F2_NWTTTGGCGCCAWWWN_eDBD_repr	3.69	r80__500bp_up_and_100bp_down_tss.mc9nr.feather	w0.005	0.7	0.00863914	559.762	0.869114	0.165314	5.25735	1.46147e-07	2.88608e-06	Upregulated	HW_vs_CW	obesity_upregulated
E2f2	Fkbp1b	TRUE	3	taipale_cyt_meth__E2F2_NWTTTGGCGCCAWWWN_eDBD_repr	3.69	r80__500bp_up_and_100bp_down_tss.mc9nr.feather	w0.005	0.6	0.00578875	178.494	1.40336	0.31972	4.38934	1.13697e-05	0.000129206	Upregulated	HW_vs_CW	obesity_upregulated
E2f2	Fzd4	TRUE	6	taipale_cyt_meth__E2F2_NWTTTGGCGCCAWWWN_eDBD_repr	3.69	r80__500bp_up_and_100bp_down_tss.mc9nr.feather	w0.005	0.2	0.00986077	39272.6	0.692541	0.206027	3.36141	0.000775443	0.00466116	Upregulated	HW_vs_CW	obesity_upregulated
E2f2	Hr	TRUE	1	taipale_cyt_meth__E2F2_NWTTTGGCGCCAWWWN_eDBD_repr	3.69	r80__500bp_up_and_100bp_down_tss.mc9nr.feather	w0.005	0.2	0.0081817	8345.82	0.804354	0.319646	2.51639	0.0118563	0.0429807	Upregulated	HW_vs_CW	obesity_upregulated
E2f2	Hspa14	TRUE	5	taipale_cyt_meth__E2F2_NWTTTGGCGCCAWWWN_eDBD_repr	3.69	r80__500bp_up_and_100bp_down_tss.mc9nr.feather	w0.005	0.3	0.00910547	1794.71	0.815771	0.142245	5.73498	9.75266e-09	2.55852e-07	Upregulated	HW_vs_CW	obesity_upregulated
E2f2	Hydin	TRUE	2	taipale_cyt_meth__E2F2_NWTTTGGCGCCAWWWN_eDBD_repr	3.69	r80__500bp_up_and_100bp_down_tss.mc9nr.feather	w0.005	0.7	0.00568548	147.169	2.94079	0.508725	5.78071	7.43857e-09	1.99479e-07	Upregulated	HW_vs_CW	obesity_upregulated
E2f2	Kif4	TRUE	8	taipale_cyt_meth__E2F2_NWTTTGGCGCCAWWWN_eDBD_repr	3.69	r80__500bp_up_and_100bp_down_tss.mc9nr.feather	w0.005	0.7	0.00779739	115.426	1.62476	0.346188	4.6933	2.68836e-06	3.69331e-05	Upregulated	HW_vs_CW	obesity_upregulated
E2f2	Lcp1	TRUE	5	taipale_cyt_meth__E2F2_NWTTTGGCGCCAWWWN_eDBD_repr	3.69	r80__500bp_up_and_100bp_down_tss.mc9nr.feather	w0.005	0.5	0.0050036	11505.3	1.50297	0.314735	4.77534	1.79403e-06	2.57964e-05	Upregulated	HW_vs_CW	obesity_upregulated
E2f2	Lix1l	TRUE	4	taipale_cyt_meth__E2F2_NWTTTGGCGCCAWWWN_eDBD_repr	3.69	r80__500bp_up_and_100bp_down_tss.mc9nr.feather	w0.005	0.7	0.0074005	4759.87	0.501104	0.184987	2.70887	0.00675137	0.0274112	Upregulated	HW_vs_CW	obesity_upregulated
E2f2	Map1lc3a	TRUE	1	taipale_cyt_meth__E2F2_NWTTTGGCGCCAWWWN_eDBD_repr	3.69	r80__500bp_up_and_100bp_down_tss.mc9nr.feather	w0.005	0.6	0.0102094	8558.63	0.515053	0.175888	2.9283	0.00340819	0.0158319	Upregulated	HW_vs_CW	obesity_upregulated
E2f2	Mdp1	TRUE	4	taipale_cyt_meth__E2F2_NWTTTGGCGCCAWWWN_eDBD_repr	3.69	r80__500bp_up_and_100bp_down_tss.mc9nr.feather	w0.005	0.7	0.00526736	1781.67	0.506132	0.107829	4.69385	2.68107e-06	3.68586e-05	Upregulated	HW_vs_CW	obesity_upregulated
E2f2	Mest	TRUE	3	taipale_cyt_meth__E2F2_NWTTTGGCGCCAWWWN_eDBD_repr	3.69	r80__500bp_up_and_100bp_down_tss.mc9nr.feather	w0.005	0.7	0.0103471	20384.4	3.65543	0.703545	5.19573	2.03914e-07	3.84958e-06	Upregulated	HW_vs_CW	obesity_upregulated
E2f2	Mis18bp1	TRUE	1	taipale_cyt_meth__E2F2_NWTTTGGCGCCAWWWN_eDBD_repr	3.69	r80__500bp_up_and_100bp_down_tss.mc9nr.feather	w0.005	0.7	0.00919858	93.6449	1.51555	0.430098	3.52373	0.000425522	0.00281512	Upregulated	HW_vs_CW	obesity_upregulated
E2f2	Mthfd2	TRUE	2	taipale_cyt_meth__E2F2_NWTTTGGCGCCAWWWN_eDBD_repr	3.69	r80__500bp_up_and_100bp_down_tss.mc9nr.feather	w0.005	0.7	0.00750684	616.168	0.782992	0.267889	2.92282	0.00346874	0.0160637	Upregulated	HW_vs_CW	obesity_upregulated
E2f2	Ndc80	TRUE	8	taipale_cyt_meth__E2F2_NWTTTGGCGCCAWWWN_eDBD_repr	3.69	r80__500bp_up_and_100bp_down_tss.mc9nr.feather	w0.005	0.7	0.00546869	103.341	2.29158	0.345387	6.63481	3.24926e-11	1.4977e-09	Upregulated	HW_vs_CW	obesity_upregulated
E2f2	Nos2	TRUE	7	taipale_cyt_meth__E2F2_NWTTTGGCGCCAWWWN_eDBD_repr	3.69	r80__500bp_up_and_100bp_down_tss.mc9nr.feather	w0.005	0.7	0.00768517	664.404	0.894021	0.345106	2.59057	0.00958179	0.0363518	Upregulated	HW_vs_CW	obesity_upregulated
E2f2	Panx1	TRUE	3	taipale_cyt_meth__E2F2_NWTTTGGCGCCAWWWN_eDBD_repr	3.69	r80__500bp_up_and_100bp_down_tss.mc9nr.feather	w0.005	0.615587	0.00522816	385.364	1.26087	0.224035	5.62801	1.82304e-08	4.47326e-07	Upregulated	HW_vs_CW	obesity_upregulated
E2f2	Pfn1	TRUE	4	taipale_cyt_meth__E2F2_NWTTTGGCGCCAWWWN_eDBD_repr	3.69	r80__500bp_up_and_100bp_down_tss.mc9nr.feather	w0.005	0.6	0.0071435	14605.4	0.754195	0.180833	4.17068	3.03695e-05	0.000302896	Upregulated	HW_vs_CW	obesity_upregulated
E2f2	Pik3ap1	TRUE	4	taipale_cyt_meth__E2F2_NWTTTGGCGCCAWWWN_eDBD_repr	3.69	r80__500bp_up_and_100bp_down_tss.mc9nr.feather	w0.005	0.6	0.010002	2154.71	1.73535	0.385031	4.50704	6.57395e-06	8.09051e-05	Upregulated	HW_vs_CW	obesity_upregulated
E2f2	Pxdn	TRUE	5	taipale_cyt_meth__E2F2_NWTTTGGCGCCAWWWN_eDBD_repr	3.69	r80__500bp_up_and_100bp_down_tss.mc9nr.feather	w0.005	0.3	0.00822805	24989.7	0.760391	0.246704	3.0822	0.00205476	0.0104314	Upregulated	HW_vs_CW	obesity_upregulated
E2f2	Rap1gap2	TRUE	2	taipale_cyt_meth__E2F2_NWTTTGGCGCCAWWWN_eDBD_repr	3.69	r80__500bp_up_and_100bp_down_tss.mc9nr.feather	w0.005	0.2	0.00672483	3516.83	0.883384	0.228291	3.86956	0.000109034	0.000902651	Upregulated	HW_vs_CW	obesity_upregulated
E2f2	Rasa1	TRUE	9	taipale_cyt_meth__E2F2_NWTTTGGCGCCAWWWN_eDBD_repr	3.69	r80__500bp_up_and_100bp_down_tss.mc9nr.feather	w0.005	0.6	0.00601913	3987.51	0.555405	0.181417	3.06148	0.00220248	0.0110505	Upregulated	HW_vs_CW	obesity_upregulated
E2f2	Rfxap	TRUE	3	taipale_cyt_meth__E2F2_NWTTTGGCGCCAWWWN_eDBD_repr	3.69	r80__500bp_up_and_100bp_down_tss.mc9nr.feather	w0.005	0.7	0.00514866	1124.74	0.578432	0.197932	2.92237	0.00347374	0.0160787	Upregulated	HW_vs_CW	obesity_upregulated
E2f2	Rnaseh2b	TRUE	3	taipale_cyt_meth__E2F2_NWTTTGGCGCCAWWWN_eDBD_repr	3.69	r80__500bp_up_and_100bp_down_tss.mc9nr.feather	w0.005	0.7	0.0122149	460.187	0.785362	0.192648	4.07666	4.56868e-05	0.000426959	Upregulated	HW_vs_CW	obesity_upregulated
E2f2	Rrm1	TRUE	6	taipale_cyt_meth__E2F2_NWTTTGGCGCCAWWWN_eDBD_repr	3.69	r80__500bp_up_and_100bp_down_tss.mc9nr.feather	w0.005	0.7	0.00815966	1745.52	0.50975	0.0958144	5.32018	1.03662e-07	2.12804e-06	Upregulated	HW_vs_CW	obesity_upregulated
E2f2	Sc5d	TRUE	7	taipale_cyt_meth__E2F2_NWTTTGGCGCCAWWWN_eDBD_repr	3.69	r80__500bp_up_and_100bp_down_tss.mc9nr.feather	w0.005	0.7	0.00811905	8113.98	1.05937	0.200709	5.27812	1.30514e-07	2.61398e-06	Upregulated	HW_vs_CW	obesity_upregulated
E2f2	Serpinh1	TRUE	3	taipale_cyt_meth__E2F2_NWTTTGGCGCCAWWWN_eDBD_repr	3.69	r80__500bp_up_and_100bp_down_tss.mc9nr.feather	w0.005	0.6	0.00839023	31701	1.31192	0.162211	8.08776	6.07707e-16	6.3433e-14	Upregulated	HW_vs_CW	obesity_upregulated
E2f2	Smc2	TRUE	8	taipale_cyt_meth__E2F2_NWTTTGGCGCCAWWWN_eDBD_repr	3.69	r80__500bp_up_and_100bp_down_tss.mc9nr.feather	w0.005	0.6	0.0121675	741.62	1.27486	0.145558	8.75844	1.97966e-18	3.25456e-16	Upregulated	HW_vs_CW	obesity_upregulated
E2f2	Stim2	TRUE	6	taipale_cyt_meth__E2F2_NWTTTGGCGCCAWWWN_eDBD_repr	3.69	r80__500bp_up_and_100bp_down_tss.mc9nr.feather	w0.005	0.2	0.0127265	3058.56	0.677971	0.131838	5.14246	2.7117e-07	4.93055e-06	Upregulated	HW_vs_CW	obesity_upregulated
E2f2	Tcirg1	TRUE	5	taipale_cyt_meth__E2F2_NWTTTGGCGCCAWWWN_eDBD_repr	3.69	r80__500bp_up_and_100bp_down_tss.mc9nr.feather	w0.005	0.6	0.00548702	4329.2	1.41217	0.274652	5.14168	2.72296e-07	4.94645e-06	Upregulated	HW_vs_CW	obesity_upregulated
E2f2	Vasn	TRUE	2	taipale_cyt_meth__E2F2_NWTTTGGCGCCAWWWN_eDBD_repr	3.69	r80__500bp_up_and_100bp_down_tss.mc9nr.feather	w0.005	0.1	0.00540507	2227.91	0.702965	0.150028	4.68555	2.79215e-06	3.81729e-05	Upregulated	HW_vs_CW	obesity_upregulated
E2f2	Xkr6	TRUE	7	taipale_cyt_meth__E2F2_NWTTTGGCGCCAWWWN_eDBD_repr	3.69	r80__500bp_up_and_100bp_down_tss.mc9nr.feather	w0.005	0.7	0.006983	157.341	1.08628	0.404876	2.68301	0.00729637	0.0291618	Upregulated	HW_vs_CW	obesity_upregulated
E2f2	Zdhhc20	TRUE	1	taipale_cyt_meth__E2F2_NWTTTGGCGCCAWWWN_eDBD_repr	3.69	r80__500bp_up_and_100bp_down_tss.mc9nr.feather	w0.005	0.7	0.00659909	3577.15	0.629559	0.187959	3.34945	0.000809707	0.00483325	Upregulated	HW_vs_CW	obesity_upregulated
E2f2	Zfp518b	TRUE	2	taipale_cyt_meth__E2F2_NWTTTGGCGCCAWWWN_eDBD_repr	3.69	r80__500bp_up_and_100bp_down_tss.mc9nr.feather	w0.005	0.8	0.00621409	661.531	0.663363	0.201707	3.28874	0.00100636	0.00579831	Upregulated	HW_vs_CW	obesity_upregulated
E2f2	6530402F18Rik	TRUE	2	cisbp__M5354	3.47	r80__10kb_up_and_down_tss.mc9nr.feather	top50perTarget	0.9	0.00841533	758.441	0.637878	0.242938	2.62569	0.00864744	0.0334586	Upregulated	HW_vs_CW	obesity_upregulated
E2f2	Ccnd2	TRUE	7	cisbp__M5354	3.47	r80__10kb_up_and_down_tss.mc9nr.feather	top50perTarget	0.8	0.00876744	18310	0.57945	0.226083	2.563	0.0103774	0.0387149	Upregulated	HW_vs_CW	obesity_upregulated
E2f2	Cd247	TRUE	3	cisbp__M5354	3.47	r80__10kb_up_and_down_tss.mc9nr.feather	top50perTarget	0.7	0.00957244	237.328	1.62951	0.276122	5.9014	3.60432e-09	1.05499e-07	Upregulated	HW_vs_CW	obesity_upregulated
E2f2	Iscu	TRUE	5	cisbp__M5354	3.47	r80__10kb_up_and_down_tss.mc9nr.feather	top50perTarget	0.6	0.0100466	8604.48	0.634199	0.166969	3.79831	0.000145687	0.00115148	Upregulated	HW_vs_CW	obesity_upregulated
E2f2	Nepn	TRUE	1	cisbp__M5354	3.47	r80__10kb_up_and_down_tss.mc9nr.feather	top50perTarget	0.9	0.0136297	317.774	0.816951	0.275686	2.96333	0.00304325	0.0144321	Upregulated	HW_vs_CW	obesity_upregulated
E2f2	Shtn1	TRUE	3	cisbp__M5354	3.47	r80__10kb_up_and_down_tss.mc9nr.feather	top50perTarget	0.5	0.011792	2013.39	1.08855	0.225793	4.82103	1.42821e-06	2.11055e-05	Upregulated	HW_vs_CW	obesity_upregulated
E2f2	Taok3	TRUE	6	cisbp__M5354	3.47	r80__10kb_up_and_down_tss.mc9nr.feather	top50perTarget	0.5	0.0148499	2545.54	0.738437	0.202214	3.65176	0.000260454	0.00187527	Upregulated	HW_vs_CW	obesity_upregulated
E2f2	Tmem229b	TRUE	2	cisbp__M5354	3.47	r80__10kb_up_and_down_tss.mc9nr.feather	top50perTarget	0.6	0.00959899	1573.49	0.81833	0.268525	3.0475	0.00230752	0.0114782	Upregulated	HW_vs_CW	obesity_upregulated
E2f2	Trim21	TRUE	1	cisbp__M5354	3.47	r80__10kb_up_and_down_tss.mc9nr.feather	top50perTarget	0.9	0.0121391	948.372	0.566615	0.13405	4.22689	2.36942e-05	0.000244477	Upregulated	HW_vs_CW	obesity_upregulated
E2f2	Parp14	TRUE	5	cisbp__M5354	3.29	r80__500bp_up_and_100bp_down_tss.mc9nr.feather	top10perTarget	0.7	0.014477	6507.3	0.557328	0.187638	2.97023	0.00297574	0.0141493	Upregulated	HW_vs_CW	obesity_upregulated
E2f6	1700025G04Rik	TRUE	24	factorbook__E2F4	7.76	r80__500bp_up_and_100bp_down_tss.mc9nr.feather	w0.001	0.6	0.0135052	1501.8	0.87489	0.356212	2.45609	0.0140457	0.0491999	Upregulated	HW_vs_CW	obesity_upregulated
E2f6	2310022A10Rik	TRUE	8	factorbook__E2F4	7.76	r80__500bp_up_and_100bp_down_tss.mc9nr.feather	w0.001	0.4	0.0080596	1541.12	0.758036	0.199822	3.79356	0.000148502	0.00117186	Upregulated	HW_vs_CW	obesity_upregulated
E2f6	2510009E07Rik	TRUE	17	factorbook__E2F4	7.76	r80__500bp_up_and_100bp_down_tss.mc9nr.feather	w0.001	0.9	0.00864182	2746.87	0.699672	0.164899	4.24303	2.20525e-05	0.000229942	Upregulated	HW_vs_CW	obesity_upregulated
E2f6	4930579G24Rik	TRUE	8	factorbook__E2F4	7.76	r80__500bp_up_and_100bp_down_tss.mc9nr.feather	w0.001	0.3	0.00334774	138.194	0.919723	0.196711	4.6755	2.93232e-06	3.99785e-05	Upregulated	HW_vs_CW	obesity_upregulated
E2f6	Actb	TRUE	14	factorbook__E2F4	7.76	r80__500bp_up_and_100bp_down_tss.mc9nr.feather	w0.001	0.1	0.00231777	115039	0.642913	0.200363	3.20873	0.00133321	0.00731462	Upregulated	HW_vs_CW	obesity_upregulated
E2f6	Adamts17	TRUE	21	factorbook__E2F4	7.76	r80__500bp_up_and_100bp_down_tss.mc9nr.feather	w0.001	0.7	0.0206651	92.8925	2.13255	0.472765	4.5108	6.45849e-06	7.97828e-05	Upregulated	HW_vs_CW	obesity_upregulated
E2f6	Agfg2	TRUE	26	factorbook__E2F4	7.76	r80__500bp_up_and_100bp_down_tss.mc9nr.feather	w0.001	0.7	0.0206371	2483.47	0.607426	0.100763	6.02827	1.65724e-09	5.18953e-08	Upregulated	HW_vs_CW	obesity_upregulated
E2f6	Amer1	TRUE	8	factorbook__E2F4	7.76	r80__500bp_up_and_100bp_down_tss.mc9nr.feather	w0.001	0.7	0.00350453	1573.14	0.968638	0.184948	5.23735	1.62895e-07	3.17234e-06	Upregulated	HW_vs_CW	obesity_upregulated
E2f6	Amotl2	TRUE	12	factorbook__E2F4	7.76	r80__500bp_up_and_100bp_down_tss.mc9nr.feather	w0.001	0.7	0.00574315	16514.4	0.575118	0.200712	2.8654	0.00416489	0.0186231	Upregulated	HW_vs_CW	obesity_upregulated
E2f6	Angptl1	TRUE	11	factorbook__E2F4	7.76	r80__500bp_up_and_100bp_down_tss.mc9nr.feather	w0.001	0.4	0.00658063	400.928	1.39173	0.246617	5.6433	1.66822e-08	4.12415e-07	Upregulated	HW_vs_CW	obesity_upregulated
E2f6	Anln	TRUE	10	factorbook__E2F4	7.76	r80__500bp_up_and_100bp_down_tss.mc9nr.feather	w0.001	0.3	0.0081325	1073.5	0.611562	0.228688	2.67422	0.00749032	0.0297922	Upregulated	HW_vs_CW	obesity_upregulated
E2f6	Ano8	TRUE	1	factorbook__E2F4	7.76	r80__500bp_up_and_100bp_down_tss.mc9nr.feather	w0.001	0.3	0.00713657	1456.65	0.93048	0.145635	6.38911	1.66855e-10	6.66337e-09	Upregulated	HW_vs_CW	obesity_upregulated
E2f6	Ap1s1	TRUE	18	factorbook__E2F4	7.76	r80__500bp_up_and_100bp_down_tss.mc9nr.feather	w0.001	0.3	0.00501725	3773.62	0.63383	0.14745	4.29861	1.71871e-05	0.000184678	Upregulated	HW_vs_CW	obesity_upregulated
E2f6	Ap3b2	TRUE	18	factorbook__E2F4	7.76	r80__500bp_up_and_100bp_down_tss.mc9nr.feather	w0.001	0.1	0.00245341	144.914	1.4501	0.578072	2.50852	0.0121238	0.043783	Upregulated	HW_vs_CW	obesity_upregulated
E2f6	Apex2	TRUE	21	factorbook__E2F4	7.76	r80__500bp_up_and_100bp_down_tss.mc9nr.feather	w0.001	0.5	0.00895316	690.25	0.52536	0.16682	3.14927	0.00163679	0.00865236	Upregulated	HW_vs_CW	obesity_upregulated
E2f6	Apoo-ps	TRUE	19	factorbook__E2F4	7.76	r80__500bp_up_and_100bp_down_tss.mc9nr.feather	w0.001	0.6	0.0222809	118.29	1.55825	0.633859	2.45835	0.0139575	0.048959	Upregulated	HW_vs_CW	obesity_upregulated
E2f6	Arhgap33	TRUE	9	factorbook__E2F4	7.76	r80__500bp_up_and_100bp_down_tss.mc9nr.feather	w0.001	0.5	0.00407619	183.034	0.597794	0.12634	4.73161	2.22744e-06	3.12762e-05	Upregulated	HW_vs_CW	obesity_upregulated
E2f6	Arhgap6	TRUE	20	factorbook__E2F4	7.76	r80__500bp_up_and_100bp_down_tss.mc9nr.feather	w0.001	0.3	0.00345235	764.633	0.518375	0.165041	3.14088	0.00168441	0.00884012	Upregulated	HW_vs_CW	obesity_upregulated
E2f6	Armc6	TRUE	24	factorbook__E2F4	7.76	r80__500bp_up_and_100bp_down_tss.mc9nr.feather	w0.001	0.7	0.0181567	487.603	0.606663	0.171025	3.54723	0.00038931	0.00261235	Upregulated	HW_vs_CW	obesity_upregulated
E2f6	Armcx3	TRUE	14	factorbook__E2F4	7.76	r80__500bp_up_and_100bp_down_tss.mc9nr.feather	w0.001	0.5	0.0040521	1939.95	0.599472	0.129264	4.63756	3.52549e-06	4.66784e-05	Upregulated	HW_vs_CW	obesity_upregulated
E2f6	Arsi	TRUE	12	factorbook__E2F4	7.76	r80__500bp_up_and_100bp_down_tss.mc9nr.feather	w0.001	0.4	0.00351788	595.637	1.18353	0.397873	2.97465	0.00293325	0.0139911	Upregulated	HW_vs_CW	obesity_upregulated
E2f6	Arvcf	TRUE	6	factorbook__E2F4	7.76	r80__500bp_up_and_100bp_down_tss.mc9nr.feather	w0.001	0.3	0.00134236	1137.08	0.685838	0.247866	2.76697	0.00565797	0.0237996	Upregulated	HW_vs_CW	obesity_upregulated
E2f6	Aspm	TRUE	21	factorbook__E2F4	7.76	r80__500bp_up_and_100bp_down_tss.mc9nr.feather	w0.001	0.3	0.0149645	193.927	1.6314	0.398415	4.09472	4.22679e-05	0.000401087	Upregulated	HW_vs_CW	obesity_upregulated
E2f6	Atad2	TRUE	35	factorbook__E2F4	7.76	r80__500bp_up_and_100bp_down_tss.mc9nr.feather	w0.001	0.4	0.00799996	928.942	0.611163	0.156978	3.89331	9.88874e-05	0.000829796	Upregulated	HW_vs_CW	obesity_upregulated
E2f6	Atp10a	TRUE	15	factorbook__E2F4	7.76	r80__500bp_up_and_100bp_down_tss.mc9nr.feather	w0.001	0.3	0.00413863	1830.28	1.2571	0.390004	3.2233	0.00126722	0.00702041	Upregulated	HW_vs_CW	obesity_upregulated
E2f6	Atp7b	TRUE	10	factorbook__E2F4	7.76	r80__500bp_up_and_100bp_down_tss.mc9nr.feather	w0.001	0.3	0.00210518	32.0395	2.39427	0.493953	4.84716	1.25241e-06	1.88075e-05	Upregulated	HW_vs_CW	obesity_upregulated
E2f6	Aunip	TRUE	20	factorbook__E2F4	7.76	r80__500bp_up_and_100bp_down_tss.mc9nr.feather	w0.001	0.5	0.00533802	18.5993	2.27001	0.830656	2.73279	0.00627996	0.025897	Upregulated	HW_vs_CW	obesity_upregulated
E2f6	Aurka	TRUE	6	factorbook__E2F4	7.76	r80__500bp_up_and_100bp_down_tss.mc9nr.feather	w0.001	0.4	0.00272595	178.475	0.63908	0.22402	2.85278	0.00433389	0.0192176	Upregulated	HW_vs_CW	obesity_upregulated
E2f6	Aurkb	TRUE	24	factorbook__E2F4	7.76	r80__500bp_up_and_100bp_down_tss.mc9nr.feather	w0.001	0.1	0.00924208	165.814	1.78324	0.351113	5.07883	3.79772e-07	6.5952e-06	Upregulated	HW_vs_CW	obesity_upregulated
E2f6	Bace1	TRUE	11	factorbook__E2F4	7.76	r80__500bp_up_and_100bp_down_tss.mc9nr.feather	w0.001	0.8	0.0119912	2509.35	0.5266	0.081858	6.43309	1.25032e-10	5.10691e-09	Upregulated	HW_vs_CW	obesity_upregulated
E2f6	Bahcc1	TRUE	31	factorbook__E2F4	7.76	r80__500bp_up_and_100bp_down_tss.mc9nr.feather	w0.001	0.8	0.00669244	2053.31	1.13392	0.360898	3.14195	0.00167828	0.00882281	Upregulated	HW_vs_CW	obesity_upregulated
E2f6	Bcar1	TRUE	9	factorbook__E2F4	7.76	r80__500bp_up_and_100bp_down_tss.mc9nr.feather	w0.001	0.9	0.00447642	2980.99	0.502143	0.152736	3.28766	0.00101023	0.00581476	Upregulated	HW_vs_CW	obesity_upregulated
E2f6	Bdnf	TRUE	22	factorbook__E2F4	7.76	r80__500bp_up_and_100bp_down_tss.mc9nr.feather	w0.001	0.1	0.00243878	136.106	2.00608	0.559342	3.58649	0.000335156	0.00231349	Upregulated	HW_vs_CW	obesity_upregulated
E2f6	Bmp1	TRUE	13	factorbook__E2F4	7.76	r80__500bp_up_and_100bp_down_tss.mc9nr.feather	w0.001	0.3	0.00415082	5240.52	0.680314	0.205815	3.30546	0.000948215	0.00551973	Upregulated	HW_vs_CW	obesity_upregulated
E2f6	Boc	TRUE	21	factorbook__E2F4	7.76	r80__500bp_up_and_100bp_down_tss.mc9nr.feather	w0.001	0.3	0.00357344	2808.63	0.823677	0.281468	2.92636	0.00342954	0.0159008	Upregulated	HW_vs_CW	obesity_upregulated
E2f6	Btbd3	TRUE	15	factorbook__E2F4	7.76	r80__500bp_up_and_100bp_down_tss.mc9nr.feather	w0.001	1	0.00969659	2638.04	0.535906	0.119747	4.47532	7.62962e-06	9.22286e-05	Upregulated	HW_vs_CW	obesity_upregulated
E2f6	Bub1	TRUE	15	factorbook__E2F4	7.76	r80__500bp_up_and_100bp_down_tss.mc9nr.feather	w0.001	0.1	0.00228369	89.8227	2.3688	0.485929	4.8748	1.08921e-06	1.65801e-05	Upregulated	HW_vs_CW	obesity_upregulated
E2f6	Bub1b	TRUE	14	factorbook__E2F4	7.76	r80__500bp_up_and_100bp_down_tss.mc9nr.feather	w0.001	0.1	0.00472171	389.863	0.905812	0.304085	2.97882	0.00289365	0.0138222	Upregulated	HW_vs_CW	obesity_upregulated
E2f6	C1qtnf6	TRUE	15	factorbook__E2F4	7.76	r80__500bp_up_and_100bp_down_tss.mc9nr.feather	w0.001	0.1	0.00697939	1308.23	0.977551	0.301977	3.23717	0.00120722	0.00674295	Upregulated	HW_vs_CW	obesity_upregulated
E2f6	Cachd1	TRUE	22	factorbook__E2F4	7.76	r80__500bp_up_and_100bp_down_tss.mc9nr.feather	w0.001	0.7	0.0143751	5115.68	1.18253	0.256578	4.60885	4.04903e-06	5.29001e-05	Upregulated	HW_vs_CW	obesity_upregulated
E2f6	Calm1	TRUE	18	factorbook__E2F4	7.76	r80__500bp_up_and_100bp_down_tss.mc9nr.feather	w0.001	0.9	0.0077209	31601.6	0.676199	0.0907191	7.45377	9.07117e-14	6.628e-12	Upregulated	HW_vs_CW	obesity_upregulated
E2f6	Calm2	TRUE	14	factorbook__E2F4	7.76	r80__500bp_up_and_100bp_down_tss.mc9nr.feather	w0.001	0.5	0.00202395	15782.3	0.654261	0.139243	4.69868	2.61849e-06	3.61622e-05	Upregulated	HW_vs_CW	obesity_upregulated
E2f6	Calm3	TRUE	13	factorbook__E2F4	7.76	r80__500bp_up_and_100bp_down_tss.mc9nr.feather	w0.001	0.8	0.00478399	13308.9	0.841534	0.106476	7.90349	2.71204e-15	2.55995e-13	Upregulated	HW_vs_CW	obesity_upregulated
E2f6	Cand2	TRUE	10	factorbook__E2F4	7.76	r80__500bp_up_and_100bp_down_tss.mc9nr.feather	w0.001	0.6	0.0126485	618.51	2.44025	0.710171	3.43614	0.000590068	0.00370492	Upregulated	HW_vs_CW	obesity_upregulated
E2f6	Cav1	TRUE	15	factorbook__E2F4	7.76	r80__500bp_up_and_100bp_down_tss.mc9nr.feather	w0.001	0.6	0.00248464	122491	1.23994	0.216818	5.7188	1.07281e-08	2.77383e-07	Upregulated	HW_vs_CW	obesity_upregulated
E2f6	Cbx8	TRUE	14	factorbook__E2F4	7.76	r80__500bp_up_and_100bp_down_tss.mc9nr.feather	w0.001	0.3	0.00355292	562.435	1.02953	0.229616	4.48372	7.33527e-06	8.91073e-05	Upregulated	HW_vs_CW	obesity_upregulated
E2f6	Ccdc102a	TRUE	13	factorbook__E2F4	7.76	r80__500bp_up_and_100bp_down_tss.mc9nr.feather	w0.001	0.1	0.00488532	918.424	0.626528	0.198118	3.16239	0.00156479	0.00833877	Upregulated	HW_vs_CW	obesity_upregulated
E2f6	Ccdc171	TRUE	15	factorbook__E2F4	7.76	r80__500bp_up_and_100bp_down_tss.mc9nr.feather	w0.001	0.4	0.00527221	150.259	0.677554	0.175459	3.86161	0.000112643	0.000929408	Upregulated	HW_vs_CW	obesity_upregulated
E2f6	Ccdc28b	TRUE	6	factorbook__E2F4	7.76	r80__500bp_up_and_100bp_down_tss.mc9nr.feather	w0.001	0.5	0.00101831	929.972	0.568861	0.101142	5.62437	1.86185e-08	4.56281e-07	Upregulated	HW_vs_CW	obesity_upregulated
E2f6	Ccdc88a	TRUE	11	factorbook__E2F4	7.76	r80__500bp_up_and_100bp_down_tss.mc9nr.feather	w0.001	0.1	0.00160395	1716.82	0.7164	0.149245	4.80016	1.5854e-06	2.29976e-05	Upregulated	HW_vs_CW	obesity_upregulated
E2f6	Ccna2	TRUE	13	factorbook__E2F4	7.76	r80__500bp_up_and_100bp_down_tss.mc9nr.feather	w0.001	0.1	0.0044349	258.89	1.77272	0.359855	4.92619	8.38465e-07	1.31384e-05	Upregulated	HW_vs_CW	obesity_upregulated
E2f6	Ccnb2	TRUE	7	factorbook__E2F4	7.76	r80__500bp_up_and_100bp_down_tss.mc9nr.feather	w0.001	0.1	0.00313932	166.044	1.85735	0.35236	5.27118	1.35547e-07	2.69835e-06	Upregulated	HW_vs_CW	obesity_upregulated
E2f6	Ccne1	TRUE	17	factorbook__E2F4	7.76	r80__500bp_up_and_100bp_down_tss.mc9nr.feather	w0.001	0.1	0.00451958	224.865	1.50715	0.295136	5.10665	3.27926e-07	5.8277e-06	Upregulated	HW_vs_CW	obesity_upregulated
E2f6	Ccne2	TRUE	27	factorbook__E2F4	7.76	r80__500bp_up_and_100bp_down_tss.mc9nr.feather	w0.001	0.7	0.00632169	250.26	0.692878	0.240451	2.88158	0.00395686	0.0178425	Upregulated	HW_vs_CW	obesity_upregulated
E2f6	Cdc25c	TRUE	15	factorbook__E2F4	7.76	r80__500bp_up_and_100bp_down_tss.mc9nr.feather	w0.001	0.1	0.00293699	20.5257	2.7785	0.671411	4.13831	3.49879e-05	0.000341535	Upregulated	HW_vs_CW	obesity_upregulated
E2f6	Cdc42ep1	TRUE	19	factorbook__E2F4	7.76	r80__500bp_up_and_100bp_down_tss.mc9nr.feather	w0.001	0.3	0.00561884	9568.29	0.593748	0.203953	2.9112	0.00360041	0.0165373	Upregulated	HW_vs_CW	obesity_upregulated
E2f6	Cdc45	TRUE	16	factorbook__E2F4	7.76	r80__500bp_up_and_100bp_down_tss.mc9nr.feather	w0.001	0.4	0.0114434	398.427	0.75453	0.134934	5.59183	2.24687e-08	5.41886e-07	Upregulated	HW_vs_CW	obesity_upregulated
E2f6	Cdc7	TRUE	20	factorbook__E2F4	7.76	r80__500bp_up_and_100bp_down_tss.mc9nr.feather	w0.001	0.1	0.0039146	249.923	0.98069	0.226589	4.32806	1.50429e-05	0.000165329	Upregulated	HW_vs_CW	obesity_upregulated
E2f6	Cdca3	TRUE	22	factorbook__E2F4	7.76	r80__500bp_up_and_100bp_down_tss.mc9nr.feather	w0.001	0.1	0.00668509	270.967	1.35935	0.280871	4.83977	1.2999e-06	1.93982e-05	Upregulated	HW_vs_CW	obesity_upregulated
E2f6	Cdca5	TRUE	20	factorbook__E2F4	7.76	r80__500bp_up_and_100bp_down_tss.mc9nr.feather	w0.001	0.1	0.00399316	54.1365	2.05043	0.45736	4.48318	7.35388e-06	8.92235e-05	Upregulated	HW_vs_CW	obesity_upregulated
E2f6	Cdca7l	TRUE	25	factorbook__E2F4	7.76	r80__500bp_up_and_100bp_down_tss.mc9nr.feather	w0.001	0.1	0.0080498	386.406	1.73566	0.294563	5.89231	3.80825e-09	1.10484e-07	Upregulated	HW_vs_CW	obesity_upregulated
E2f6	Cdk1	TRUE	18	factorbook__E2F4	7.76	r80__500bp_up_and_100bp_down_tss.mc9nr.feather	w0.001	0.1	0.00528423	344.567	1.60868	0.383942	4.18989	2.79086e-05	0.000281915	Upregulated	HW_vs_CW	obesity_upregulated
E2f6	Cdk14	TRUE	19	factorbook__E2F4	7.76	r80__500bp_up_and_100bp_down_tss.mc9nr.feather	w0.001	0.3	0.00378008	3607.33	0.710943	0.195165	3.64278	0.000269714	0.00193277	Upregulated	HW_vs_CW	obesity_upregulated
E2f6	Cdkn2d	TRUE	22	factorbook__E2F4	7.76	r80__500bp_up_and_100bp_down_tss.mc9nr.feather	w0.001	0.8	0.00694818	703.191	0.643566	0.135703	4.74247	2.11131e-06	2.98153e-05	Upregulated	HW_vs_CW	obesity_upregulated
E2f6	Cdkn3	TRUE	27	factorbook__E2F4	7.76	r80__500bp_up_and_100bp_down_tss.mc9nr.feather	w0.001	0.1	0.00622448	49.7619	1.36051	0.346654	3.92469	8.68423e-05	0.000741656	Upregulated	HW_vs_CW	obesity_upregulated
E2f6	Cdt1	TRUE	26	factorbook__E2F4	7.76	r80__500bp_up_and_100bp_down_tss.mc9nr.feather	w0.001	0.1	0.00574822	326.286	1.08588	0.283079	3.83595	0.000125079	0.00101379	Upregulated	HW_vs_CW	obesity_upregulated
E2f6	Cenpc1	TRUE	7	factorbook__E2F4	7.76	r80__500bp_up_and_100bp_down_tss.mc9nr.feather	w0.001	0.3	0.00267565	874.214	0.827538	0.175106	4.72593	2.2906e-06	3.19809e-05	Upregulated	HW_vs_CW	obesity_upregulated
E2f6	Cenpf	TRUE	8	factorbook__E2F4	7.76	r80__500bp_up_and_100bp_down_tss.mc9nr.feather	w0.001	0.4	0.0065353	185.701	1.88901	0.358086	5.27529	1.32545e-07	2.64661e-06	Upregulated	HW_vs_CW	obesity_upregulated
E2f6	Cenpm	TRUE	18	factorbook__E2F4	7.76	r80__500bp_up_and_100bp_down_tss.mc9nr.feather	w0.001	0.1	0.00443867	58.2154	1.43174	0.478488	2.99222	0.00276959	0.0133395	Upregulated	HW_vs_CW	obesity_upregulated
E2f6	Cenpp	TRUE	12	factorbook__E2F4	7.76	r80__500bp_up_and_100bp_down_tss.mc9nr.feather	w0.001	0.5	0.00266137	70.3691	1.35612	0.276612	4.9026	9.45743e-07	1.46013e-05	Upregulated	HW_vs_CW	obesity_upregulated
E2f6	Cenpu	TRUE	3	factorbook__E2F4	7.76	r80__500bp_up_and_100bp_down_tss.mc9nr.feather	w0.001	0.3	0.00377706	59.0795	1.03303	0.360456	2.8659	0.00415826	0.0185976	Upregulated	HW_vs_CW	obesity_upregulated
E2f6	Cenpw	TRUE	9	factorbook__E2F4	7.76	r80__500bp_up_and_100bp_down_tss.mc9nr.feather	w0.001	0.3	0.00202551	71.8682	0.978838	0.354759	2.75917	0.00579491	0.0242413	Upregulated	HW_vs_CW	obesity_upregulated
E2f6	Cep162	TRUE	10	factorbook__E2F4	7.76	r80__500bp_up_and_100bp_down_tss.mc9nr.feather	w0.001	0.3	0.00430926	844.656	0.764594	0.178176	4.29122	1.77694e-05	0.000190209	Upregulated	HW_vs_CW	obesity_upregulated
E2f6	Cep250	TRUE	24	factorbook__E2F4	7.76	r80__500bp_up_and_100bp_down_tss.mc9nr.feather	w0.001	0.3	0.00653908	2439.13	0.584987	0.146024	4.00611	6.17269e-05	0.000551767	Upregulated	HW_vs_CW	obesity_upregulated
E2f6	Cep55	TRUE	18	factorbook__E2F4	7.76	r80__500bp_up_and_100bp_down_tss.mc9nr.feather	w0.001	0.3	0.00678316	102.886	1.97213	0.392973	5.0185	5.20777e-07	8.71912e-06	Upregulated	HW_vs_CW	obesity_upregulated
E2f6	Chaf1b	TRUE	14	factorbook__E2F4	7.76	r80__500bp_up_and_100bp_down_tss.mc9nr.feather	w0.001	0.1	0.003556	111.947	1.28071	0.357804	3.57936	0.000344433	0.00236676	Upregulated	HW_vs_CW	obesity_upregulated
E2f6	Chek1	TRUE	25	factorbook__E2F4	7.76	r80__500bp_up_and_100bp_down_tss.mc9nr.feather	w0.001	0.7	0.00503866	72.0013	1.41857	0.274123	5.17495	2.27972e-07	4.20714e-06	Upregulated	HW_vs_CW	obesity_upregulated
E2f6	Ciart	TRUE	7	factorbook__E2F4	7.76	r80__500bp_up_and_100bp_down_tss.mc9nr.feather	w0.001	0.3	0.00437565	297.75	2.15671	0.490588	4.39616	1.1018e-05	0.000125935	Upregulated	HW_vs_CW	obesity_upregulated
E2f6	Ckap2l	TRUE	9	factorbook__E2F4	7.76	r80__500bp_up_and_100bp_down_tss.mc9nr.feather	w0.001	0.3	0.00364889	145.821	1.84973	0.279262	6.62365	3.50447e-11	1.58934e-09	Upregulated	HW_vs_CW	obesity_upregulated
E2f6	Cks1b	TRUE	18	factorbook__E2F4	7.76	r80__500bp_up_and_100bp_down_tss.mc9nr.feather	w0.001	0.5	0.00192105	786.979	0.73217	0.152685	4.79529	1.62437e-06	2.35283e-05	Upregulated	HW_vs_CW	obesity_upregulated
E2f6	Clspn	TRUE	20	factorbook__E2F4	7.76	r80__500bp_up_and_100bp_down_tss.mc9nr.feather	w0.001	0.1	0.00296819	104.085	1.54697	0.440423	3.51246	0.00044398	0.00291977	Upregulated	HW_vs_CW	obesity_upregulated
E2f6	Cmc2	TRUE	11	factorbook__E2F4	7.76	r80__500bp_up_and_100bp_down_tss.mc9nr.feather	w0.001	0.9	0.00788822	816.452	0.620653	0.178374	3.4795	0.000502352	0.00322604	Upregulated	HW_vs_CW	obesity_upregulated
E2f6	Cntln	TRUE	29	factorbook__E2F4	7.76	r80__500bp_up_and_100bp_down_tss.mc9nr.feather	w0.001	0.5	0.00804616	1519.62	0.653437	0.188018	3.47539	0.000510116	0.0032727	Upregulated	HW_vs_CW	obesity_upregulated
E2f6	Cntrl	TRUE	20	factorbook__E2F4	7.76	r80__500bp_up_and_100bp_down_tss.mc9nr.feather	w0.001	0.3	0.00709102	2086.66	0.551397	0.146525	3.76317	0.000167775	0.00130054	Upregulated	HW_vs_CW	obesity_upregulated
E2f6	Col5a1	TRUE	12	factorbook__E2F4	7.76	r80__500bp_up_and_100bp_down_tss.mc9nr.feather	w0.001	0.3	0.00407425	13984.2	1.09129	0.266994	4.08733	4.36365e-05	0.000410912	Upregulated	HW_vs_CW	obesity_upregulated
E2f6	Creb3l2	TRUE	19	factorbook__E2F4	7.76	r80__500bp_up_and_100bp_down_tss.mc9nr.feather	w0.001	0.5	0.00464814	6430	0.694527	0.215936	3.21635	0.00129832	0.00716653	Upregulated	HW_vs_CW	obesity_upregulated
E2f6	Crtac1	TRUE	13	factorbook__E2F4	7.76	r80__500bp_up_and_100bp_down_tss.mc9nr.feather	w0.001	0.1	0.00439946	2720.57	2.13794	0.465249	4.59527	4.32188e-06	5.58729e-05	Upregulated	HW_vs_CW	obesity_upregulated
E2f6	Csgalnact1	TRUE	3	factorbook__E2F4	7.76	r80__500bp_up_and_100bp_down_tss.mc9nr.feather	w0.001	0.3	0.00709725	747.918	0.979296	0.140636	6.96334	3.32298e-12	1.80098e-10	Upregulated	HW_vs_CW	obesity_upregulated
E2f6	Cxcl1	TRUE	12	factorbook__E2F4	7.76	r80__500bp_up_and_100bp_down_tss.mc9nr.feather	w0.001	0.4	0.00129335	141.777	2.05632	0.469872	4.37635	1.20685e-05	0.00013574	Upregulated	HW_vs_CW	obesity_upregulated
E2f6	Cxcl10	TRUE	7	factorbook__E2F4	7.76	r80__500bp_up_and_100bp_down_tss.mc9nr.feather	w0.001	0.1	0.0032781	209.935	0.880256	0.213504	4.1229	3.74133e-05	0.00036102	Upregulated	HW_vs_CW	obesity_upregulated
E2f6	Cxcr4	TRUE	20	factorbook__E2F4	7.76	r80__500bp_up_and_100bp_down_tss.mc9nr.feather	w0.001	0.2	0.00329237	2586.35	1.41723	0.557926	2.54018	0.0110796	0.040711	Upregulated	HW_vs_CW	obesity_upregulated
E2f6	Cyp4v3	TRUE	12	factorbook__E2F4	7.76	r80__500bp_up_and_100bp_down_tss.mc9nr.feather	w0.001	0.1	0.0048291	7986.8	1.34397	0.261595	5.13761	2.78261e-07	5.04089e-06	Upregulated	HW_vs_CW	obesity_upregulated
E2f6	D430019H16Rik	TRUE	13	factorbook__E2F4	7.76	r80__500bp_up_and_100bp_down_tss.mc9nr.feather	w0.001	0.7	0.0208514	2249.55	3.21258	0.557172	5.76587	8.12375e-09	2.15878e-07	Upregulated	HW_vs_CW	obesity_upregulated
E2f6	D930048N14Rik	TRUE	24	factorbook__E2F4	7.76	r80__500bp_up_and_100bp_down_tss.mc9nr.feather	w0.001	0.3	0.00605709	296.473	0.65275	0.186675	3.49672	0.000471011	0.0030738	Upregulated	HW_vs_CW	obesity_upregulated
E2f6	Dbp	TRUE	29	factorbook__E2F4	7.76	r80__500bp_up_and_100bp_down_tss.mc9nr.feather	w0.001	0.8	0.0177153	3093.23	4.51913	0.221496	20.4028	1.57972e-92	1.03882e-88	Upregulated	HW_vs_CW	obesity_upregulated
E2f6	Dcp2	TRUE	15	factorbook__E2F4	7.76	r80__500bp_up_and_100bp_down_tss.mc9nr.feather	w0.001	0.9	0.00427457	2543.62	0.568336	0.127837	4.44578	8.75719e-06	0.000103761	Upregulated	HW_vs_CW	obesity_upregulated
E2f6	Ddias	TRUE	25	factorbook__E2F4	7.76	r80__500bp_up_and_100bp_down_tss.mc9nr.feather	w0.001	0.5	0.0104222	55.1738	1.59376	0.365978	4.35479	1.33194e-05	0.000148622	Upregulated	HW_vs_CW	obesity_upregulated
E2f6	Dgat2	TRUE	11	factorbook__E2F4	7.76	r80__500bp_up_and_100bp_down_tss.mc9nr.feather	w0.001	0.6	0.00195799	58157.2	1.13513	0.32852	3.45528	0.000549723	0.00349273	Upregulated	HW_vs_CW	obesity_upregulated
E2f6	Dgkz	TRUE	14	factorbook__E2F4	7.76	r80__500bp_up_and_100bp_down_tss.mc9nr.feather	w0.001	0.3	0.00499978	4729.48	0.66467	0.160071	4.15236	3.29071e-05	0.000325083	Upregulated	HW_vs_CW	obesity_upregulated
E2f6	Diaph3	TRUE	15	factorbook__E2F4	7.76	r80__500bp_up_and_100bp_down_tss.mc9nr.feather	w0.001	0.1	0.0120925	132.361	1.6957	0.401586	4.2225	2.41612e-05	0.000247919	Upregulated	HW_vs_CW	obesity_upregulated
E2f6	Dnajb1	TRUE	13	factorbook__E2F4	7.76	r80__500bp_up_and_100bp_down_tss.mc9nr.feather	w0.001	0.2	0.00257164	6884.56	1.21714	0.459287	2.65007	0.00804747	0.0315753	Upregulated	HW_vs_CW	obesity_upregulated
E2f6	Dnajb4	TRUE	24	factorbook__E2F4	7.76	r80__500bp_up_and_100bp_down_tss.mc9nr.feather	w0.001	0.8	0.0148746	5671.43	0.723365	0.176262	4.10392	4.06207e-05	0.000387507	Upregulated	HW_vs_CW	obesity_upregulated
E2f6	Dnmt1	TRUE	28	factorbook__E2F4	7.76	r80__500bp_up_and_100bp_down_tss.mc9nr.feather	w0.001	0.3	0.00531264	2591.99	0.598304	0.196053	3.05174	0.00227518	0.0113374	Upregulated	HW_vs_CW	obesity_upregulated
E2f6	Dtx3l	TRUE	17	factorbook__E2F4	7.76	r80__500bp_up_and_100bp_down_tss.mc9nr.feather	w0.001	0.7	0.00939809	3507.26	0.542	0.166427	3.25669	0.00112718	0.00637528	Upregulated	HW_vs_CW	obesity_upregulated
E2f6	Dusp10	TRUE	13	factorbook__E2F4	7.76	r80__500bp_up_and_100bp_down_tss.mc9nr.feather	w0.001	0.3	0.00519063	2319.65	1.20637	0.319647	3.77407	0.000160608	0.00125385	Upregulated	HW_vs_CW	obesity_upregulated
E2f6	E130310I04Rik	TRUE	2	factorbook__E2F4	7.76	r80__500bp_up_and_100bp_down_tss.mc9nr.feather	w0.001	0.4	0.00296007	63.3536	1.87139	0.457059	4.09441	4.23248e-05	0.000401392	Upregulated	HW_vs_CW	obesity_upregulated
E2f6	E2f1	TRUE	34	factorbook__E2F4	7.76	r80__500bp_up_and_100bp_down_tss.mc9nr.feather	w0.001	0.1	0.00674942	937.562	1.38249	0.319895	4.32169	1.54838e-05	0.000169608	Upregulated	HW_vs_CW	obesity_upregulated
E2f6	E2f2	TRUE	24	factorbook__E2F4	7.76	r80__500bp_up_and_100bp_down_tss.mc9nr.feather	w0.001	0.3	0.00109775	181.326	1.4183	0.341802	4.1495	3.33208e-05	0.000328348	Upregulated	HW_vs_CW	obesity_upregulated
E2f6	E2f6	TRUE	19	factorbook__E2F4	7.76	r80__500bp_up_and_100bp_down_tss.mc9nr.feather	w0.001	1	NA	2323.53	0.519289	0.176602	2.94045	0.00327738	0.0153432	Upregulated	HW_vs_CW	obesity_upregulated
E2f6	E2f8	TRUE	24	factorbook__E2F4	7.76	r80__500bp_up_and_100bp_down_tss.mc9nr.feather	w0.001	0.2	0.00443781	73.848	2.07947	0.501464	4.1468	3.37149e-05	0.000331278	Upregulated	HW_vs_CW	obesity_upregulated
E2f6	Edem1	TRUE	21	factorbook__E2F4	7.76	r80__500bp_up_and_100bp_down_tss.mc9nr.feather	w0.001	0.1	0.00922715	11856.9	0.774151	0.187736	4.12361	3.72975e-05	0.000360159	Upregulated	HW_vs_CW	obesity_upregulated
E2f6	Eepd1	TRUE	8	factorbook__E2F4	7.76	r80__500bp_up_and_100bp_down_tss.mc9nr.feather	w0.001	0.6	0.00884414	10827	1.9159	0.214745	8.92175	4.58978e-19	8.08457e-17	Upregulated	HW_vs_CW	obesity_upregulated
E2f6	Eif2ak2	TRUE	5	factorbook__E2F4	7.76	r80__500bp_up_and_100bp_down_tss.mc9nr.feather	w0.001	0.3	0.00520541	2287.09	0.789474	0.143162	5.51457	3.49639e-08	8.10538e-07	Upregulated	HW_vs_CW	obesity_upregulated
E2f6	Elmo2	TRUE	19	factorbook__E2F4	7.76	r80__500bp_up_and_100bp_down_tss.mc9nr.feather	w0.001	0.1	0.00522534	4319.68	0.718671	0.181206	3.96603	7.30785e-05	0.000640183	Upregulated	HW_vs_CW	obesity_upregulated
E2f6	Eme1	TRUE	11	factorbook__E2F4	7.76	r80__500bp_up_and_100bp_down_tss.mc9nr.feather	w0.001	0.9	0.0160308	32.9025	1.5037	0.411422	3.65489	0.000257289	0.00185791	Upregulated	HW_vs_CW	obesity_upregulated
E2f6	Emilin1	TRUE	17	factorbook__E2F4	7.76	r80__500bp_up_and_100bp_down_tss.mc9nr.feather	w0.001	0.3	0.00102157	1993.95	0.540999	0.164358	3.2916	0.000996204	0.00574759	Upregulated	HW_vs_CW	obesity_upregulated
E2f6	Entpd7	TRUE	8	factorbook__E2F4	7.76	r80__500bp_up_and_100bp_down_tss.mc9nr.feather	w0.001	0.3	0.00236325	544.7	0.871002	0.2599	3.3513	0.00080433	0.00480989	Upregulated	HW_vs_CW	obesity_upregulated
E2f6	Ephb6	TRUE	8	factorbook__E2F4	7.76	r80__500bp_up_and_100bp_down_tss.mc9nr.feather	w0.001	0.820783	0.0127278	519.109	0.831482	0.117043	7.10406	1.21141e-12	7.0706e-11	Upregulated	HW_vs_CW	obesity_upregulated
E2f6	Esco2	TRUE	17	factorbook__E2F4	7.76	r80__500bp_up_and_100bp_down_tss.mc9nr.feather	w0.001	0.3	0.00310424	50.7175	1.54837	0.43882	3.52849	0.000417937	0.00277705	Upregulated	HW_vs_CW	obesity_upregulated
E2f6	Espl1	TRUE	17	factorbook__E2F4	7.76	r80__500bp_up_and_100bp_down_tss.mc9nr.feather	w0.001	0.3	0.00270686	249.114	0.858292	0.314311	2.73071	0.0063198	0.0260286	Upregulated	HW_vs_CW	obesity_upregulated
E2f6	Esyt1	TRUE	14	factorbook__E2F4	7.76	r80__500bp_up_and_100bp_down_tss.mc9nr.feather	w0.001	0.2	0.00607183	17549.4	0.551908	0.198358	2.78238	0.00539624	0.0229038	Upregulated	HW_vs_CW	obesity_upregulated
E2f6	Eva1b	TRUE	16	factorbook__E2F4	7.76	r80__500bp_up_and_100bp_down_tss.mc9nr.feather	w0.001	0.3	0.00518545	962.463	0.702912	0.253565	2.77212	0.00556925	0.0235016	Upregulated	HW_vs_CW	obesity_upregulated
E2f6	Evi5l	TRUE	17	factorbook__E2F4	7.76	r80__500bp_up_and_100bp_down_tss.mc9nr.feather	w0.001	0.8	0.00761519	2453.03	0.560826	0.0947782	5.91725	3.2737e-09	9.61065e-08	Upregulated	HW_vs_CW	obesity_upregulated
E2f6	Exoc4	TRUE	26	factorbook__E2F4	7.76	r80__500bp_up_and_100bp_down_tss.mc9nr.feather	w0.001	0.9	0.012691	4210.66	0.771572	0.11088	6.9586	3.43668e-12	1.8575e-10	Upregulated	HW_vs_CW	obesity_upregulated
E2f6	Fam122b	TRUE	20	factorbook__E2F4	7.76	r80__500bp_up_and_100bp_down_tss.mc9nr.feather	w0.001	0.3	0.0041323	559.762	0.869114	0.165314	5.25735	1.46147e-07	2.88608e-06	Upregulated	HW_vs_CW	obesity_upregulated
E2f6	Fam171b	TRUE	7	factorbook__E2F4	7.76	r80__500bp_up_and_100bp_down_tss.mc9nr.feather	w0.001	0.1	0.00310668	385.299	0.690888	0.233376	2.9604	0.00307236	0.0145526	Upregulated	HW_vs_CW	obesity_upregulated
E2f6	Fam184a	TRUE	10	factorbook__E2F4	7.76	r80__500bp_up_and_100bp_down_tss.mc9nr.feather	w0.001	0.1	0.00491921	375.538	1.75645	0.228884	7.67399	1.66732e-14	1.4178e-12	Upregulated	HW_vs_CW	obesity_upregulated
E2f6	Fam234b	TRUE	12	factorbook__E2F4	7.76	r80__500bp_up_and_100bp_down_tss.mc9nr.feather	w0.001	0.5	0.00309545	883.924	1.35091	0.443697	3.04467	0.00232937	0.0115607	Upregulated	HW_vs_CW	obesity_upregulated
E2f6	Fam53b	TRUE	25	factorbook__E2F4	7.76	r80__500bp_up_and_100bp_down_tss.mc9nr.feather	w0.001	1	0.0160536	7031.45	1.29401	0.202363	6.39451	1.61066e-10	6.45834e-09	Upregulated	HW_vs_CW	obesity_upregulated
E2f6	Fam78a	TRUE	12	factorbook__E2F4	7.76	r80__500bp_up_and_100bp_down_tss.mc9nr.feather	w0.001	0.1	0.00212843	349.854	1.28636	0.33468	3.84356	0.000121262	0.000988127	Upregulated	HW_vs_CW	obesity_upregulated
E2f6	Fancg	TRUE	21	factorbook__E2F4	7.76	r80__500bp_up_and_100bp_down_tss.mc9nr.feather	w0.001	0.1	0.00906838	623.012	0.561455	0.191517	2.93161	0.00337205	0.015697	Upregulated	HW_vs_CW	obesity_upregulated
E2f6	Fanci	TRUE	20	factorbook__E2F4	7.76	r80__500bp_up_and_100bp_down_tss.mc9nr.feather	w0.001	0.2	0.00726247	43.8029	2.02727	0.429709	4.71776	2.38454e-06	3.31751e-05	Upregulated	HW_vs_CW	obesity_upregulated
E2f6	Fbxo33	TRUE	17	factorbook__E2F4	7.76	r80__500bp_up_and_100bp_down_tss.mc9nr.feather	w0.001	0.3	0.00297619	1210.13	0.568651	0.222336	2.55762	0.010539	0.0392143	Upregulated	HW_vs_CW	obesity_upregulated
E2f6	Fchsd2	TRUE	17	factorbook__E2F4	7.76	r80__500bp_up_and_100bp_down_tss.mc9nr.feather	w0.001	0.7	0.00272138	1726.46	0.512377	0.150761	3.39861	0.0006773	0.00415996	Upregulated	HW_vs_CW	obesity_upregulated
E2f6	Fen1	TRUE	7	factorbook__E2F4	7.76	r80__500bp_up_and_100bp_down_tss.mc9nr.feather	w0.001	0.8	0.00493967	49.1726	1.07372	0.268436	3.99991	6.33659e-05	0.000564372	Upregulated	HW_vs_CW	obesity_upregulated
E2f6	Fgf13	TRUE	17	factorbook__E2F4	7.76	r80__500bp_up_and_100bp_down_tss.mc9nr.feather	w0.001	0.3	0.00259956	2441.41	3.64055	0.342941	10.6157	2.51953e-26	1.18346e-23	Upregulated	HW_vs_CW	obesity_upregulated
E2f6	Fhod1	TRUE	25	factorbook__E2F4	7.76	r80__500bp_up_and_100bp_down_tss.mc9nr.feather	w0.001	0.6	0.0076567	2822.51	0.503221	0.195524	2.5737	0.0100617	0.0378091	Upregulated	HW_vs_CW	obesity_upregulated
E2f6	Fkbp10	TRUE	15	factorbook__E2F4	7.76	r80__500bp_up_and_100bp_down_tss.mc9nr.feather	w0.001	0.5	0.00709075	1462.36	0.637623	0.156179	4.08264	4.45263e-05	0.000417497	Upregulated	HW_vs_CW	obesity_upregulated
E2f6	Flot1	TRUE	16	factorbook__E2F4	7.76	r80__500bp_up_and_100bp_down_tss.mc9nr.feather	w0.001	0.3	0.00513689	5285.36	1.07016	0.17224	6.2132	5.19149e-10	1.82559e-08	Upregulated	HW_vs_CW	obesity_upregulated
E2f6	Fmr1	TRUE	22	factorbook__E2F4	7.76	r80__500bp_up_and_100bp_down_tss.mc9nr.feather	w0.001	0.9	0.0102029	17442.7	2.40433	0.234991	10.2316	1.43167e-24	5.64881e-22	Upregulated	HW_vs_CW	obesity_upregulated
E2f6	Foxm1	TRUE	16	factorbook__E2F4	7.76	r80__500bp_up_and_100bp_down_tss.mc9nr.feather	w0.001	0.1	0.00407073	261.072	0.982617	0.229452	4.28245	1.84843e-05	0.0001969	Upregulated	HW_vs_CW	obesity_upregulated
E2f6	Frmd4a	TRUE	18	factorbook__E2F4	7.76	r80__500bp_up_and_100bp_down_tss.mc9nr.feather	w0.001	0.1	0.00564716	2582.07	0.506797	0.163427	3.10106	0.00192832	0.00989131	Upregulated	HW_vs_CW	obesity_upregulated
E2f6	Gab1	TRUE	12	factorbook__E2F4	7.76	r80__500bp_up_and_100bp_down_tss.mc9nr.feather	w0.001	0.3	0.00489658	2547.59	0.502201	0.154917	3.24175	0.00118798	0.00664866	Upregulated	HW_vs_CW	obesity_upregulated
E2f6	Galnt7	TRUE	20	factorbook__E2F4	7.76	r80__500bp_up_and_100bp_down_tss.mc9nr.feather	w0.001	0.3	0.00297861	944.293	0.734173	0.171638	4.27744	1.89053e-05	0.000200842	Upregulated	HW_vs_CW	obesity_upregulated
E2f6	Gins1	TRUE	29	factorbook__E2F4	7.76	r80__500bp_up_and_100bp_down_tss.mc9nr.feather	w0.001	0.205196	0.00594786	136.144	0.539727	0.215098	2.50922	0.0120999	0.0437193	Upregulated	HW_vs_CW	obesity_upregulated
E2f6	Gins2	TRUE	24	factorbook__E2F4	7.76	r80__500bp_up_and_100bp_down_tss.mc9nr.feather	w0.001	0.1	0.00899585	341.141	0.874331	0.243135	3.59607	0.000323059	0.0022457	Upregulated	HW_vs_CW	obesity_upregulated
E2f6	Gins3	TRUE	19	factorbook__E2F4	7.76	r80__500bp_up_and_100bp_down_tss.mc9nr.feather	w0.001	0.3	0.00135496	169.09	0.713568	0.21509	3.31753	0.000908159	0.00532743	Upregulated	HW_vs_CW	obesity_upregulated
E2f6	Gm10584	TRUE	10	factorbook__E2F4	7.76	r80__500bp_up_and_100bp_down_tss.mc9nr.feather	w0.001	0.7	0.0069313	21.1588	1.34852	0.470052	2.86887	0.00411946	0.0184701	Upregulated	HW_vs_CW	obesity_upregulated
E2f6	Gm11266	TRUE	33	factorbook__E2F4	7.76	r80__500bp_up_and_100bp_down_tss.mc9nr.feather	w0.001	0.6	0.0119038	153.09	0.918052	0.270021	3.39993	0.000674038	0.00414121	Upregulated	HW_vs_CW	obesity_upregulated
E2f6	Gm13375	TRUE	20	factorbook__E2F4	7.76	r80__500bp_up_and_100bp_down_tss.mc9nr.feather	w0.001	0.3	0.0023298	251.155	0.621199	0.235238	2.64073	0.00827278	0.0323179	Upregulated	HW_vs_CW	obesity_upregulated
E2f6	Gm5144	TRUE	18	factorbook__E2F4	7.76	r80__500bp_up_and_100bp_down_tss.mc9nr.feather	w0.001	0.1	0.0109486	69.2005	2.07726	0.454679	4.56862	4.90939e-06	6.26066e-05	Upregulated	HW_vs_CW	obesity_upregulated
E2f6	Gmfb	TRUE	10	factorbook__E2F4	7.76	r80__500bp_up_and_100bp_down_tss.mc9nr.feather	w0.001	0.3	0.00326262	9458.19	0.502391	0.118722	4.23165	2.31984e-05	0.000239989	Upregulated	HW_vs_CW	obesity_upregulated
E2f6	Grb2	TRUE	18	factorbook__E2F4	7.76	r80__500bp_up_and_100bp_down_tss.mc9nr.feather	w0.001	0.1	0.00219813	6848.97	0.510424	0.141729	3.60142	0.000316487	0.00220858	Upregulated	HW_vs_CW	obesity_upregulated
E2f6	Gypc	TRUE	5	factorbook__E2F4	7.76	r80__500bp_up_and_100bp_down_tss.mc9nr.feather	w0.001	0.6	0.0115851	2249.4	0.683927	0.193788	3.52926	0.000416725	0.00276993	Upregulated	HW_vs_CW	obesity_upregulated
E2f6	Haus6	TRUE	19	factorbook__E2F4	7.76	r80__500bp_up_and_100bp_down_tss.mc9nr.feather	w0.001	0.5	0.00801883	673.89	0.54594	0.131767	4.14321	3.42475e-05	0.000335469	Upregulated	HW_vs_CW	obesity_upregulated
E2f6	Hells	TRUE	17	factorbook__E2F4	7.76	r80__500bp_up_and_100bp_down_tss.mc9nr.feather	w0.001	0.1	0.00228362	173.075	1.36648	0.320173	4.26793	1.97294e-05	0.00020881	Upregulated	HW_vs_CW	obesity_upregulated
E2f6	Hhex	TRUE	16	factorbook__E2F4	7.76	r80__500bp_up_and_100bp_down_tss.mc9nr.feather	w0.001	0.3	0.00126961	590.829	1.66559	0.45165	3.68779	0.000226211	0.00167393	Upregulated	HW_vs_CW	obesity_upregulated
E2f6	Hic1	TRUE	14	factorbook__E2F4	7.76	r80__500bp_up_and_100bp_down_tss.mc9nr.feather	w0.001	0.3	0.00122851	1927.24	0.636726	0.241293	2.63881	0.00831978	0.0324629	Upregulated	HW_vs_CW	obesity_upregulated
E2f6	Hivep2	TRUE	18	factorbook__E2F4	7.76	r80__500bp_up_and_100bp_down_tss.mc9nr.feather	w0.001	0.9	0.0096022	5055.44	0.620444	0.175869	3.52788	0.000418899	0.00278063	Upregulated	HW_vs_CW	obesity_upregulated
E2f6	Hltf	TRUE	21	factorbook__E2F4	7.76	r80__500bp_up_and_100bp_down_tss.mc9nr.feather	w0.001	0.5	0.00398393	1656.38	0.718552	0.11859	6.05911	1.36874e-09	4.36933e-08	Upregulated	HW_vs_CW	obesity_upregulated
E2f6	Hmga2	TRUE	28	factorbook__E2F4	7.76	r80__500bp_up_and_100bp_down_tss.mc9nr.feather	w0.001	0.1	0.00532991	44.1691	4.7283	1.23414	3.83126	0.000127489	0.00102741	Upregulated	HW_vs_CW	obesity_upregulated
E2f6	Hmga2-ps1	TRUE	15	factorbook__E2F4	7.76	r80__500bp_up_and_100bp_down_tss.mc9nr.feather	w0.001	0.3	0.00397436	469.248	1.1753	0.333216	3.52714	0.000420073	0.00278727	Upregulated	HW_vs_CW	obesity_upregulated
E2f6	Hmgn5	TRUE	22	factorbook__E2F4	7.76	r80__500bp_up_and_100bp_down_tss.mc9nr.feather	w0.001	0.5	0.00398084	1748.64	0.568147	0.174161	3.2622	0.00110552	0.00627078	Upregulated	HW_vs_CW	obesity_upregulated
E2f6	Hmmr	TRUE	5	factorbook__E2F4	7.76	r80__500bp_up_and_100bp_down_tss.mc9nr.feather	w0.001	0.1	0.00220042	101.801	2.40557	0.378019	6.36362	1.97049e-10	7.77476e-09	Upregulated	HW_vs_CW	obesity_upregulated
E2f6	Hspa13	TRUE	18	factorbook__E2F4	7.76	r80__500bp_up_and_100bp_down_tss.mc9nr.feather	w0.001	0.3	0.00518213	2991.85	0.507783	0.151586	3.34981	0.000808676	0.00483002	Upregulated	HW_vs_CW	obesity_upregulated
E2f6	Hspa14	TRUE	19	factorbook__E2F4	7.76	r80__500bp_up_and_100bp_down_tss.mc9nr.feather	w0.001	0.3	0.00201895	1794.71	0.815771	0.142245	5.73498	9.75266e-09	2.55852e-07	Upregulated	HW_vs_CW	obesity_upregulated
E2f6	Hspa1a	TRUE	11	factorbook__E2F4	7.76	r80__500bp_up_and_100bp_down_tss.mc9nr.feather	w0.001	0.2	0.00377199	3215.57	2.93346	1.07667	2.72455	0.0064389	0.0263818	Upregulated	HW_vs_CW	obesity_upregulated
E2f6	Hspbap1	TRUE	15	factorbook__E2F4	7.76	r80__500bp_up_and_100bp_down_tss.mc9nr.feather	w0.001	0.3	0.00363217	400.08	0.602522	0.152767	3.94405	8.01166e-05	0.000692916	Upregulated	HW_vs_CW	obesity_upregulated
E2f6	Hspg2	TRUE	14	factorbook__E2F4	7.76	r80__500bp_up_and_100bp_down_tss.mc9nr.feather	w0.001	0.3	0.0101152	77646.8	0.582711	0.237058	2.45809	0.0139677	0.0489788	Upregulated	HW_vs_CW	obesity_upregulated
E2f6	Ifih1	TRUE	16	factorbook__E2F4	7.76	r80__500bp_up_and_100bp_down_tss.mc9nr.feather	w0.001	0.7	0.00850066	2413.11	0.577699	0.159716	3.61705	0.000297983	0.00209875	Upregulated	HW_vs_CW	obesity_upregulated
E2f6	Igdcc4	TRUE	3	factorbook__E2F4	7.76	r80__500bp_up_and_100bp_down_tss.mc9nr.feather	w0.001	0.6	0.00368362	609.897	1.53348	0.617167	2.48471	0.0129658	0.0462382	Upregulated	HW_vs_CW	obesity_upregulated
E2f6	Igsf8	TRUE	14	factorbook__E2F4	7.76	r80__500bp_up_and_100bp_down_tss.mc9nr.feather	w0.001	0.1	0.00100357	2038.4	0.712823	0.190064	3.75044	0.000176522	0.00135714	Upregulated	HW_vs_CW	obesity_upregulated
E2f6	Igsf9	TRUE	11	factorbook__E2F4	7.76	r80__500bp_up_and_100bp_down_tss.mc9nr.feather	w0.001	0.4	0.00288086	243.128	0.607146	0.21985	2.76164	0.00575118	0.0241044	Upregulated	HW_vs_CW	obesity_upregulated
E2f6	Ikbip	TRUE	5	factorbook__E2F4	7.76	r80__500bp_up_and_100bp_down_tss.mc9nr.feather	w0.001	0.5	0.0033086	1815.21	0.859247	0.151394	5.67558	1.38221e-08	3.48698e-07	Upregulated	HW_vs_CW	obesity_upregulated
E2f6	Incenp	TRUE	9	factorbook__E2F4	7.76	r80__500bp_up_and_100bp_down_tss.mc9nr.feather	w0.001	0.1	0.00305825	753.902	0.861274	0.259495	3.31904	0.000903274	0.00530509	Upregulated	HW_vs_CW	obesity_upregulated
E2f6	Iqgap1	TRUE	6	factorbook__E2F4	7.76	r80__500bp_up_and_100bp_down_tss.mc9nr.feather	w0.001	0.1	0.00474896	15928.5	0.714046	0.190179	3.75459	0.000173623	0.0013385	Upregulated	HW_vs_CW	obesity_upregulated
E2f6	Iqgap3	TRUE	21	factorbook__E2F4	7.76	r80__500bp_up_and_100bp_down_tss.mc9nr.feather	w0.001	0.1	0.00648574	198.003	1.90124	0.407711	4.66322	3.11307e-06	4.19212e-05	Upregulated	HW_vs_CW	obesity_upregulated
E2f6	Iscu	TRUE	18	factorbook__E2F4	7.76	r80__500bp_up_and_100bp_down_tss.mc9nr.feather	w0.001	0.1	0.00207709	8604.48	0.634199	0.166969	3.79831	0.000145687	0.00115148	Upregulated	HW_vs_CW	obesity_upregulated
E2f6	Itm2c	TRUE	16	factorbook__E2F4	7.76	r80__500bp_up_and_100bp_down_tss.mc9nr.feather	w0.001	0.3	0.00117059	10981	1.01594	0.327678	3.10043	0.00193239	0.00990187	Upregulated	HW_vs_CW	obesity_upregulated
E2f6	Kcnh2	TRUE	18	factorbook__E2F4	7.76	r80__500bp_up_and_100bp_down_tss.mc9nr.feather	w0.001	0.5	0.00704462	1195.01	2.41158	0.459837	5.24441	1.56783e-07	3.06542e-06	Upregulated	HW_vs_CW	obesity_upregulated
E2f6	Kcnk2	TRUE	14	factorbook__E2F4	7.76	r80__500bp_up_and_100bp_down_tss.mc9nr.feather	w0.001	0.7	0.00447806	584.257	1.33973	0.349099	3.83768	0.000124203	0.00100834	Upregulated	HW_vs_CW	obesity_upregulated
E2f6	Kif15	TRUE	27	factorbook__E2F4	7.76	r80__500bp_up_and_100bp_down_tss.mc9nr.feather	w0.001	0.1	0.00552667	100.323	1.20301	0.441855	2.72263	0.00647644	0.0264912	Upregulated	HW_vs_CW	obesity_upregulated
E2f6	Kif18a	TRUE	6	factorbook__E2F4	7.76	r80__500bp_up_and_100bp_down_tss.mc9nr.feather	w0.001	0.3	0.00353746	88.7621	1.43609	0.390952	3.67333	0.000239414	0.00175778	Upregulated	HW_vs_CW	obesity_upregulated
E2f6	Kif20a	TRUE	14	factorbook__E2F4	7.76	r80__500bp_up_and_100bp_down_tss.mc9nr.feather	w0.001	0.1	0.00839784	215.947	1.34711	0.304398	4.42548	9.62288e-06	0.000112331	Upregulated	HW_vs_CW	obesity_upregulated
E2f6	Kif23	TRUE	10	factorbook__E2F4	7.76	r80__500bp_up_and_100bp_down_tss.mc9nr.feather	w0.001	0.7	0.00487937	355.851	0.659676	0.208084	3.17025	0.00152309	0.00817177	Upregulated	HW_vs_CW	obesity_upregulated
E2f6	Kif4	TRUE	9	factorbook__E2F4	7.76	r80__500bp_up_and_100bp_down_tss.mc9nr.feather	w0.001	0.2	0.00459501	115.426	1.62476	0.346188	4.6933	2.68836e-06	3.69331e-05	Upregulated	HW_vs_CW	obesity_upregulated
E2f6	Klf14	TRUE	9	factorbook__E2F4	7.76	r80__500bp_up_and_100bp_down_tss.mc9nr.feather	w0.001	0.4	0.00367959	461.307	2.71956	0.623684	4.36048	1.29776e-05	0.000144973	Upregulated	HW_vs_CW	obesity_upregulated
E2f6	Klf8	TRUE	13	factorbook__E2F4	7.76	r80__500bp_up_and_100bp_down_tss.mc9nr.feather	w0.001	0.1	0.00673934	253.392	0.906186	0.278283	3.25634	0.00112858	0.00637552	Upregulated	HW_vs_CW	obesity_upregulated
E2f6	Klhl5	TRUE	15	factorbook__E2F4	7.76	r80__500bp_up_and_100bp_down_tss.mc9nr.feather	w0.001	0.1	0.00475691	7226.43	0.903586	0.189442	4.76972	1.84484e-06	2.64691e-05	Upregulated	HW_vs_CW	obesity_upregulated
E2f6	Knstrn	TRUE	2	factorbook__E2F4	7.76	r80__500bp_up_and_100bp_down_tss.mc9nr.feather	w0.001	0.1	0.00128215	179.078	1.43462	0.36046	3.97996	6.89254e-05	0.000608122	Upregulated	HW_vs_CW	obesity_upregulated
E2f6	Kntc1	TRUE	28	factorbook__E2F4	7.76	r80__500bp_up_and_100bp_down_tss.mc9nr.feather	w0.001	0.1	0.00612458	109.144	2.11238	0.387202	5.4555	4.88351e-08	1.08371e-06	Upregulated	HW_vs_CW	obesity_upregulated
E2f6	Kpna2	TRUE	19	factorbook__E2F4	7.76	r80__500bp_up_and_100bp_down_tss.mc9nr.feather	w0.001	0.3	0.0115321	1980.09	0.975656	0.120213	8.11608	4.81472e-16	5.0794e-14	Upregulated	HW_vs_CW	obesity_upregulated
E2f6	Ksr1	TRUE	21	factorbook__E2F4	7.76	r80__500bp_up_and_100bp_down_tss.mc9nr.feather	w0.001	0.9	0.0342531	2296.34	0.718824	0.282285	2.54645	0.0108826	0.0401445	Upregulated	HW_vs_CW	obesity_upregulated
E2f6	Large1	TRUE	21	factorbook__E2F4	7.76	r80__500bp_up_and_100bp_down_tss.mc9nr.feather	w0.001	0.3	0.0146303	2411.91	0.722118	0.166546	4.33584	1.45204e-05	0.000160122	Upregulated	HW_vs_CW	obesity_upregulated
E2f6	Lbh	TRUE	7	factorbook__E2F4	7.76	r80__500bp_up_and_100bp_down_tss.mc9nr.feather	w0.001	0.3	0.00299932	3769.79	0.625355	0.242759	2.57603	0.0099941	0.0375927	Upregulated	HW_vs_CW	obesity_upregulated
E2f6	Lgals1	TRUE	10	factorbook__E2F4	7.76	r80__500bp_up_and_100bp_down_tss.mc9nr.feather	w0.001	0.3	0.00793927	65481.3	0.859495	0.234119	3.67119	0.000241425	0.0017686	Upregulated	HW_vs_CW	obesity_upregulated
E2f6	Lhfpl2	TRUE	14	factorbook__E2F4	7.76	r80__500bp_up_and_100bp_down_tss.mc9nr.feather	w0.001	0.2	0.0073495	9925.56	1.87792	0.378028	4.96767	6.77614e-07	1.08931e-05	Upregulated	HW_vs_CW	obesity_upregulated
E2f6	Limch1	TRUE	20	factorbook__E2F4	7.76	r80__500bp_up_and_100bp_down_tss.mc9nr.feather	w0.001	0.5	0.00445862	4997.38	0.703471	0.210379	3.34383	0.000826317	0.00491604	Upregulated	HW_vs_CW	obesity_upregulated
E2f6	Lmnb1	TRUE	26	factorbook__E2F4	7.76	r80__500bp_up_and_100bp_down_tss.mc9nr.feather	w0.001	0.3	0.00527409	673.02	0.978508	0.156244	6.26269	3.78386e-10	1.38494e-08	Upregulated	HW_vs_CW	obesity_upregulated
E2f6	Lmnb2	TRUE	13	factorbook__E2F4	7.76	r80__500bp_up_and_100bp_down_tss.mc9nr.feather	w0.001	0.8	0.00470482	697.299	0.536597	0.168103	3.19206	0.0014126	0.00766861	Upregulated	HW_vs_CW	obesity_upregulated
E2f6	Lsm3	TRUE	25	factorbook__E2F4	7.76	r80__500bp_up_and_100bp_down_tss.mc9nr.feather	w0.001	0.1	0.00529298	1211.03	0.657426	0.165913	3.96247	7.41784e-05	0.000648954	Upregulated	HW_vs_CW	obesity_upregulated
E2f6	Lxn	TRUE	11	factorbook__E2F4	7.76	r80__500bp_up_and_100bp_down_tss.mc9nr.feather	w0.001	0.1	0.00125662	704.5	0.835346	0.196241	4.25673	2.07438e-05	0.000217793	Upregulated	HW_vs_CW	obesity_upregulated
E2f6	Ly6h	TRUE	10	factorbook__E2F4	7.76	r80__500bp_up_and_100bp_down_tss.mc9nr.feather	w0.001	0.1	0.00207027	130.675	1.66726	0.347045	4.80418	1.5539e-06	2.26909e-05	Upregulated	HW_vs_CW	obesity_upregulated
E2f6	Lypd1	TRUE	26	factorbook__E2F4	7.76	r80__500bp_up_and_100bp_down_tss.mc9nr.feather	w0.001	0.4	0.0052701	61.6998	1.77056	0.390583	4.53311	5.81203e-06	7.26614e-05	Upregulated	HW_vs_CW	obesity_upregulated
E2f6	Magi1	TRUE	22	factorbook__E2F4	7.76	r80__500bp_up_and_100bp_down_tss.mc9nr.feather	w0.001	0.1	0.00333171	2889.76	0.707543	0.191197	3.7006	0.000215088	0.00160851	Upregulated	HW_vs_CW	obesity_upregulated
E2f6	Map2k6	TRUE	12	factorbook__E2F4	7.76	r80__500bp_up_and_100bp_down_tss.mc9nr.feather	w0.001	1	0.0206005	254.249	2.09555	0.285839	7.33124	2.28041e-13	1.51986e-11	Upregulated	HW_vs_CW	obesity_upregulated
E2f6	Map4	TRUE	15	factorbook__E2F4	7.76	r80__500bp_up_and_100bp_down_tss.mc9nr.feather	w0.001	0.7	0.0267217	17933.7	0.634699	0.185701	3.41786	0.000631164	0.00391929	Upregulated	HW_vs_CW	obesity_upregulated
E2f6	Mapre2	TRUE	17	factorbook__E2F4	7.76	r80__500bp_up_and_100bp_down_tss.mc9nr.feather	w0.001	0.5	0.00671538	6327.64	0.648796	0.146869	4.41752	9.98404e-06	0.000115726	Upregulated	HW_vs_CW	obesity_upregulated
E2f6	Marcks	TRUE	16	factorbook__E2F4	7.76	r80__500bp_up_and_100bp_down_tss.mc9nr.feather	w0.001	0.1	0.00175865	7219.73	0.891335	0.291929	3.05326	0.00226368	0.0112887	Upregulated	HW_vs_CW	obesity_upregulated
E2f6	Mastl	TRUE	12	factorbook__E2F4	7.76	r80__500bp_up_and_100bp_down_tss.mc9nr.feather	w0.001	0.4	0.00261536	112.919	1.34462	0.307549	4.37206	1.23077e-05	0.000137996	Upregulated	HW_vs_CW	obesity_upregulated
E2f6	Mblac2	TRUE	9	factorbook__E2F4	7.76	r80__500bp_up_and_100bp_down_tss.mc9nr.feather	w0.001	0.4	0.00342206	621.052	0.64603	0.184155	3.50808	0.00045136	0.00296025	Upregulated	HW_vs_CW	obesity_upregulated
E2f6	Mcm10	TRUE	8	factorbook__E2F4	7.76	r80__500bp_up_and_100bp_down_tss.mc9nr.feather	w0.001	0.4	0.0107706	151.643	1.4563	0.294659	4.94231	7.72005e-07	1.22232e-05	Upregulated	HW_vs_CW	obesity_upregulated
E2f6	Mcm2	TRUE	28	factorbook__E2F4	7.76	r80__500bp_up_and_100bp_down_tss.mc9nr.feather	w0.001	0.5	0.00748679	712.777	1.36966	0.315934	4.33526	1.45586e-05	0.000160454	Upregulated	HW_vs_CW	obesity_upregulated
E2f6	Mcm5	TRUE	20	factorbook__E2F4	7.76	r80__500bp_up_and_100bp_down_tss.mc9nr.feather	w0.001	0.1	0.00456301	613.744	1.34046	0.258414	5.18725	2.13426e-07	4.00616e-06	Upregulated	HW_vs_CW	obesity_upregulated
E2f6	Mcm6	TRUE	24	factorbook__E2F4	7.76	r80__500bp_up_and_100bp_down_tss.mc9nr.feather	w0.001	0.3	0.00775036	1384.83	0.712588	0.180792	3.94149	8.09773e-05	0.000698217	Upregulated	HW_vs_CW	obesity_upregulated
E2f6	Mdga1	TRUE	32	factorbook__E2F4	7.76	r80__500bp_up_and_100bp_down_tss.mc9nr.feather	w0.001	0.3	0.0118382	96.0417	1.4865	0.272214	5.46077	4.7408e-08	1.0568e-06	Upregulated	HW_vs_CW	obesity_upregulated
E2f6	Mdp1	TRUE	6	factorbook__E2F4	7.76	r80__500bp_up_and_100bp_down_tss.mc9nr.feather	w0.001	0.3	0.00260624	1781.67	0.506132	0.107829	4.69385	2.68107e-06	3.68586e-05	Upregulated	HW_vs_CW	obesity_upregulated
E2f6	Me2	TRUE	5	factorbook__E2F4	7.76	r80__500bp_up_and_100bp_down_tss.mc9nr.feather	w0.001	0.3	0.00381356	1675.16	0.511832	0.175992	2.90827	0.0036343	0.0166467	Upregulated	HW_vs_CW	obesity_upregulated
E2f6	Mef2c	TRUE	45	factorbook__E2F4	7.76	r80__500bp_up_and_100bp_down_tss.mc9nr.feather	w0.001	0.9	0.0238301	4064.35	1.14368	0.347125	3.29473	0.000985171	0.0056962	Upregulated	HW_vs_CW	obesity_upregulated
E2f6	Megf9	TRUE	16	factorbook__E2F4	7.76	r80__500bp_up_and_100bp_down_tss.mc9nr.feather	w0.001	0.3	0.0126018	3931.64	0.658729	0.137419	4.79356	1.63844e-06	2.36974e-05	Upregulated	HW_vs_CW	obesity_upregulated
E2f6	Meis3	TRUE	9	factorbook__E2F4	7.76	r80__500bp_up_and_100bp_down_tss.mc9nr.feather	w0.001	0.1	0.00243062	654.421	0.585081	0.203845	2.87022	0.00410187	0.0184117	Upregulated	HW_vs_CW	obesity_upregulated
E2f6	Melk	TRUE	20	factorbook__E2F4	7.76	r80__500bp_up_and_100bp_down_tss.mc9nr.feather	w0.001	0.3	0.0128283	82.6372	1.82784	0.512892	3.56378	0.000365551	0.00248504	Upregulated	HW_vs_CW	obesity_upregulated
E2f6	Meox2	TRUE	23	factorbook__E2F4	7.76	r80__500bp_up_and_100bp_down_tss.mc9nr.feather	w0.001	0.7	0.00713407	3070.35	0.837891	0.231365	3.62152	0.000292881	0.0020678	Upregulated	HW_vs_CW	obesity_upregulated
E2f6	Metrn	TRUE	17	factorbook__E2F4	7.76	r80__500bp_up_and_100bp_down_tss.mc9nr.feather	w0.001	0.8	0.0110244	497.243	1.91338	0.229684	8.33049	8.05065e-17	9.62564e-15	Upregulated	HW_vs_CW	obesity_upregulated
E2f6	Mid1ip1	TRUE	12	factorbook__E2F4	7.76	r80__500bp_up_and_100bp_down_tss.mc9nr.feather	w0.001	0.8	0.00426439	1474.18	0.567937	0.193073	2.94156	0.00326565	0.0153064	Upregulated	HW_vs_CW	obesity_upregulated
E2f6	Mki67	TRUE	15	factorbook__E2F4	7.76	r80__500bp_up_and_100bp_down_tss.mc9nr.feather	w0.001	0.1	0.00277891	1260.85	2.0237	0.29865	6.77614	1.23429e-11	6.14903e-10	Upregulated	HW_vs_CW	obesity_upregulated
E2f6	Mms22l	TRUE	17	factorbook__E2F4	7.76	r80__500bp_up_and_100bp_down_tss.mc9nr.feather	w0.001	0.1	0.00540917	219.102	1.66697	0.268566	6.20694	5.40252e-10	1.88973e-08	Upregulated	HW_vs_CW	obesity_upregulated
E2f6	Morf4l2	TRUE	28	factorbook__E2F4	7.76	r80__500bp_up_and_100bp_down_tss.mc9nr.feather	w0.001	0.8	0.00803659	10463.3	0.500236	0.110644	4.52114	6.15082e-06	7.65574e-05	Upregulated	HW_vs_CW	obesity_upregulated
E2f6	Mtss1	TRUE	24	factorbook__E2F4	7.76	r80__500bp_up_and_100bp_down_tss.mc9nr.feather	w0.001	0.3	0.0117373	4349.7	0.608842	0.111096	5.48032	4.24546e-08	9.64912e-07	Upregulated	HW_vs_CW	obesity_upregulated
E2f6	Mutyh	TRUE	18	factorbook__E2F4	7.76	r80__500bp_up_and_100bp_down_tss.mc9nr.feather	w0.001	0.1	0.00603486	180.168	1.18491	0.356476	3.32396	0.000887477	0.00522319	Upregulated	HW_vs_CW	obesity_upregulated
E2f6	Mvk	TRUE	17	factorbook__E2F4	7.76	r80__500bp_up_and_100bp_down_tss.mc9nr.feather	w0.001	0.8	0.00621476	1130.23	0.93305	0.156275	5.97057	2.36427e-09	7.14276e-08	Upregulated	HW_vs_CW	obesity_upregulated
E2f6	Mxd3	TRUE	19	factorbook__E2F4	7.76	r80__500bp_up_and_100bp_down_tss.mc9nr.feather	w0.001	0.2	0.00183683	43.9712	1.13777	0.345293	3.29508	0.000983939	0.00569075	Upregulated	HW_vs_CW	obesity_upregulated
E2f6	Myo1c	TRUE	26	factorbook__E2F4	7.76	r80__500bp_up_and_100bp_down_tss.mc9nr.feather	w0.001	0.1	0.00742298	27915.7	0.511407	0.131174	3.89869	9.67127e-05	0.000813624	Upregulated	HW_vs_CW	obesity_upregulated
E2f6	Ncaph	TRUE	15	factorbook__E2F4	7.76	r80__500bp_up_and_100bp_down_tss.mc9nr.feather	w0.001	0.1	0.00678852	378.897	0.854159	0.247696	3.44842	0.000563873	0.00356163	Upregulated	HW_vs_CW	obesity_upregulated
E2f6	Nckap5l	TRUE	15	factorbook__E2F4	7.76	r80__500bp_up_and_100bp_down_tss.mc9nr.feather	w0.001	0.5	0.00194232	570.459	0.869839	0.31012	2.80485	0.00503398	0.0216788	Upregulated	HW_vs_CW	obesity_upregulated
E2f6	Nedd9	TRUE	18	factorbook__E2F4	7.76	r80__500bp_up_and_100bp_down_tss.mc9nr.feather	w0.001	0.1	0.00296294	6722.02	1.15255	0.329213	3.50094	0.000463626	0.00303162	Upregulated	HW_vs_CW	obesity_upregulated
E2f6	Neil3	TRUE	21	factorbook__E2F4	7.76	r80__500bp_up_and_100bp_down_tss.mc9nr.feather	w0.001	0.3	0.00529651	49.2071	1.83197	0.37459	4.8906	1.00529e-06	1.54098e-05	Upregulated	HW_vs_CW	obesity_upregulated
E2f6	Nek8	TRUE	14	factorbook__E2F4	7.76	r80__500bp_up_and_100bp_down_tss.mc9nr.feather	w0.001	0.5	0.00599085	421.511	0.643785	0.194366	3.31223	0.000925545	0.00541172	Upregulated	HW_vs_CW	obesity_upregulated
E2f6	Neurl1b	TRUE	17	factorbook__E2F4	7.76	r80__500bp_up_and_100bp_down_tss.mc9nr.feather	w0.001	0.3	0.00435667	1149.32	0.661764	0.188143	3.51734	0.000435891	0.00287601	Upregulated	HW_vs_CW	obesity_upregulated
E2f6	Neurl2	TRUE	4	factorbook__E2F4	7.76	r80__500bp_up_and_100bp_down_tss.mc9nr.feather	w0.001	0.3	0.00611708	187.766	1.07275	0.328924	3.26139	0.00110866	0.00628678	Upregulated	HW_vs_CW	obesity_upregulated
E2f6	Nfatc2	TRUE	14	factorbook__E2F4	7.76	r80__500bp_up_and_100bp_down_tss.mc9nr.feather	w0.001	0.3	0.00124538	1096.68	0.863904	0.236117	3.65879	0.00025341	0.00184	Upregulated	HW_vs_CW	obesity_upregulated
E2f6	Nfib	TRUE	23	factorbook__E2F4	7.76	r80__500bp_up_and_100bp_down_tss.mc9nr.feather	w0.001	0.9	0.00785577	8538.4	0.638757	0.0671118	9.5178	1.76886e-21	4.7157e-19	Upregulated	HW_vs_CW	obesity_upregulated
E2f6	Nnat	TRUE	13	factorbook__E2F4	7.76	r80__500bp_up_and_100bp_down_tss.mc9nr.feather	w0.001	0.5	0.00285744	53405.6	0.84731	0.305899	2.7699	0.0056073	0.0236369	Upregulated	HW_vs_CW	obesity_upregulated
E2f6	Nos2	TRUE	9	factorbook__E2F4	7.76	r80__500bp_up_and_100bp_down_tss.mc9nr.feather	w0.001	0.3	0.00515328	664.404	0.894021	0.345106	2.59057	0.00958179	0.0363518	Upregulated	HW_vs_CW	obesity_upregulated
E2f6	Npr3	TRUE	23	factorbook__E2F4	7.76	r80__500bp_up_and_100bp_down_tss.mc9nr.feather	w0.001	0.3	0.00572413	47961.2	2.69631	0.366478	7.35736	1.87581e-13	1.27169e-11	Upregulated	HW_vs_CW	obesity_upregulated
E2f6	Nsl1	TRUE	10	factorbook__E2F4	7.76	r80__500bp_up_and_100bp_down_tss.mc9nr.feather	w0.001	0.3	0.00278373	104.826	1.4976	0.390707	3.83306	0.000126558	0.0010222	Upregulated	HW_vs_CW	obesity_upregulated
E2f6	Nubp1	TRUE	16	factorbook__E2F4	7.76	r80__500bp_up_and_100bp_down_tss.mc9nr.feather	w0.001	0.1	0.00175283	505.59	0.596698	0.205099	2.90932	0.00362212	0.0166133	Upregulated	HW_vs_CW	obesity_upregulated
E2f6	Nup107	TRUE	16	factorbook__E2F4	7.76	r80__500bp_up_and_100bp_down_tss.mc9nr.feather	w0.001	0.5	0.00409158	1058.91	0.576276	0.167823	3.43383	0.000595122	0.00373191	Upregulated	HW_vs_CW	obesity_upregulated
E2f6	Oip5	TRUE	16	factorbook__E2F4	7.76	r80__500bp_up_and_100bp_down_tss.mc9nr.feather	w0.001	0.1	0.00188252	73.7118	1.20799	0.300077	4.02561	5.6828e-05	0.000514032	Upregulated	HW_vs_CW	obesity_upregulated
E2f6	Panx1	TRUE	14	factorbook__E2F4	7.76	r80__500bp_up_and_100bp_down_tss.mc9nr.feather	w0.001	0.0512989	0.00282787	385.364	1.26087	0.224035	5.62801	1.82304e-08	4.47326e-07	Upregulated	HW_vs_CW	obesity_upregulated
E2f6	Paqr4	TRUE	18	factorbook__E2F4	7.76	r80__500bp_up_and_100bp_down_tss.mc9nr.feather	w0.001	0.7	0.00341533	1808.67	0.959348	0.193565	4.95622	7.18793e-07	1.1445e-05	Upregulated	HW_vs_CW	obesity_upregulated
E2f6	Parpbp	TRUE	14	factorbook__E2F4	7.76	r80__500bp_up_and_100bp_down_tss.mc9nr.feather	w0.001	0.1	0.00682352	54.5329	2.03477	0.556568	3.65592	0.000256257	0.00185317	Upregulated	HW_vs_CW	obesity_upregulated
E2f6	Pask	TRUE	11	factorbook__E2F4	7.76	r80__500bp_up_and_100bp_down_tss.mc9nr.feather	w0.001	0.5	0.00317592	147.62	0.667956	0.197333	3.38492	0.000711995	0.00433526	Upregulated	HW_vs_CW	obesity_upregulated
E2f6	Pcdh19	TRUE	17	factorbook__E2F4	7.76	r80__500bp_up_and_100bp_down_tss.mc9nr.feather	w0.001	0.2	0.00531597	2051.69	0.611684	0.221005	2.76774	0.00564473	0.0237592	Upregulated	HW_vs_CW	obesity_upregulated
E2f6	Pclaf	TRUE	31	factorbook__E2F4	7.76	r80__500bp_up_and_100bp_down_tss.mc9nr.feather	w0.001	0.3	0.00537216	162.962	2.55676	0.300806	8.49969	1.90102e-17	2.53401e-15	Upregulated	HW_vs_CW	obesity_upregulated
E2f6	Pde4a	TRUE	21	factorbook__E2F4	7.76	r80__500bp_up_and_100bp_down_tss.mc9nr.feather	w0.001	0.9	0.0162838	1229	0.55326	0.18799	2.94303	0.00325014	0.0152555	Upregulated	HW_vs_CW	obesity_upregulated
E2f6	Pde4b	TRUE	13	factorbook__E2F4	7.76	r80__500bp_up_and_100bp_down_tss.mc9nr.feather	w0.001	0.9	0.00859704	2165.25	0.584982	0.191159	3.06018	0.00221205	0.0110872	Upregulated	HW_vs_CW	obesity_upregulated
E2f6	Peg10	TRUE	14	factorbook__E2F4	7.76	r80__500bp_up_and_100bp_down_tss.mc9nr.feather	w0.001	0.3	0.00167388	5442.65	3.47012	0.872792	3.97588	7.01188e-05	0.000617547	Upregulated	HW_vs_CW	obesity_upregulated
E2f6	Pfkfb4	TRUE	7	factorbook__E2F4	7.76	r80__500bp_up_and_100bp_down_tss.mc9nr.feather	w0.001	0.7	0.00607494	1190.97	1.73123	0.274899	6.29769	3.02123e-10	1.13313e-08	Upregulated	HW_vs_CW	obesity_upregulated
E2f6	Pfn1	TRUE	16	factorbook__E2F4	7.76	r80__500bp_up_and_100bp_down_tss.mc9nr.feather	w0.001	0.1	0.00434971	14605.4	0.754195	0.180833	4.17068	3.03695e-05	0.000302896	Upregulated	HW_vs_CW	obesity_upregulated
E2f6	Pik3ap1	TRUE	7	factorbook__E2F4	7.76	r80__500bp_up_and_100bp_down_tss.mc9nr.feather	w0.001	0.1	0.00345208	2154.71	1.73535	0.385031	4.50704	6.57395e-06	8.09051e-05	Upregulated	HW_vs_CW	obesity_upregulated
E2f6	Pkia	TRUE	6	factorbook__E2F4	7.76	r80__500bp_up_and_100bp_down_tss.mc9nr.feather	w0.001	0.2	0.0267241	2287.52	1.97053	0.550025	3.58262	0.00034017	0.00234318	Upregulated	HW_vs_CW	obesity_upregulated
E2f6	Plekho2	TRUE	18	factorbook__E2F4	7.76	r80__500bp_up_and_100bp_down_tss.mc9nr.feather	w0.001	0.1	0.00123282	4914.12	0.849224	0.268044	3.16822	0.00153375	0.00821998	Upregulated	HW_vs_CW	obesity_upregulated
E2f6	Plk1	TRUE	16	factorbook__E2F4	7.76	r80__500bp_up_and_100bp_down_tss.mc9nr.feather	w0.001	0.1	0.00796842	119.309	1.44911	0.425016	3.40954	0.000650723	0.00402176	Upregulated	HW_vs_CW	obesity_upregulated
E2f6	Plk2	TRUE	13	factorbook__E2F4	7.76	r80__500bp_up_and_100bp_down_tss.mc9nr.feather	w0.001	0.5	0.00238204	2552.41	1.12367	0.288825	3.89049	0.000100042	0.000838061	Upregulated	HW_vs_CW	obesity_upregulated
E2f6	Plp2	TRUE	11	factorbook__E2F4	7.76	r80__500bp_up_and_100bp_down_tss.mc9nr.feather	w0.001	0.3	0.011297	3189.05	0.650138	0.205286	3.16699	0.00154028	0.00823934	Upregulated	HW_vs_CW	obesity_upregulated
E2f6	Plxdc1	TRUE	10	factorbook__E2F4	7.76	r80__500bp_up_and_100bp_down_tss.mc9nr.feather	w0.001	0.3	0.00188562	367.248	1.33472	0.40392	3.3044	0.000951787	0.005534	Upregulated	HW_vs_CW	obesity_upregulated
E2f6	Pola1	TRUE	23	factorbook__E2F4	7.76	r80__500bp_up_and_100bp_down_tss.mc9nr.feather	w0.001	0.3	0.00425272	585.734	0.722206	0.139283	5.18516	2.15824e-07	4.02817e-06	Upregulated	HW_vs_CW	obesity_upregulated
E2f6	Pole	TRUE	22	factorbook__E2F4	7.76	r80__500bp_up_and_100bp_down_tss.mc9nr.feather	w0.001	0.1	0.00638883	284.26	1.38968	0.293075	4.7417	2.1193e-06	2.99067e-05	Upregulated	HW_vs_CW	obesity_upregulated
E2f6	Pole3	TRUE	16	factorbook__E2F4	7.76	r80__500bp_up_and_100bp_down_tss.mc9nr.feather	w0.001	0.3	0.00810821	2896.79	0.633403	0.120966	5.23621	1.63909e-07	3.18267e-06	Upregulated	HW_vs_CW	obesity_upregulated
E2f6	Polq	TRUE	16	factorbook__E2F4	7.76	r80__500bp_up_and_100bp_down_tss.mc9nr.feather	w0.001	0.1	0.00358038	77.6956	1.40082	0.342247	4.093	4.2582e-05	0.00040259	Upregulated	HW_vs_CW	obesity_upregulated
E2f6	Pomgnt2	TRUE	17	factorbook__E2F4	7.76	r80__500bp_up_and_100bp_down_tss.mc9nr.feather	w0.001	0.8	0.0185605	930.198	0.850915	0.163713	5.1976	2.01876e-07	3.81477e-06	Upregulated	HW_vs_CW	obesity_upregulated
E2f6	Ppil1	TRUE	15	factorbook__E2F4	7.76	r80__500bp_up_and_100bp_down_tss.mc9nr.feather	w0.001	0.4	0.00127949	671.757	0.790573	0.176106	4.48918	7.14991e-06	8.71777e-05	Upregulated	HW_vs_CW	obesity_upregulated
E2f6	Ppp1r35	TRUE	9	factorbook__E2F4	7.76	r80__500bp_up_and_100bp_down_tss.mc9nr.feather	w0.001	0.1	0.00209805	405.092	0.531333	0.144485	3.67742	0.000235607	0.00173306	Upregulated	HW_vs_CW	obesity_upregulated
E2f6	Prdm1	TRUE	20	factorbook__E2F4	7.76	r80__500bp_up_and_100bp_down_tss.mc9nr.feather	w0.001	0.1	0.00416265	201.886	0.922945	0.369086	2.50062	0.0123975	0.0445902	Upregulated	HW_vs_CW	obesity_upregulated
E2f6	Prps1	TRUE	26	factorbook__E2F4	7.76	r80__500bp_up_and_100bp_down_tss.mc9nr.feather	w0.001	0.2	0.0123349	8348.48	0.870546	0.209751	4.15038	3.31917e-05	0.000327239	Upregulated	HW_vs_CW	obesity_upregulated
E2f6	Psat1	TRUE	27	factorbook__E2F4	7.76	r80__500bp_up_and_100bp_down_tss.mc9nr.feather	w0.001	0.3	0.0074866	9530.68	0.981226	0.230271	4.26117	2.03361e-05	0.000214312	Upregulated	HW_vs_CW	obesity_upregulated
E2f6	Psrc1	TRUE	16	factorbook__E2F4	7.76	r80__500bp_up_and_100bp_down_tss.mc9nr.feather	w0.001	0.3	0.0029696	40.6828	1.92564	0.483497	3.98274	6.81247e-05	0.000601596	Upregulated	HW_vs_CW	obesity_upregulated
E2f6	Ptch2	TRUE	10	factorbook__E2F4	7.76	r80__500bp_up_and_100bp_down_tss.mc9nr.feather	w0.001	0.9	0.0027667	679.08	2.07627	0.543783	3.8182	0.000134431	0.00107506	Upregulated	HW_vs_CW	obesity_upregulated
E2f6	Ptchd4	TRUE	21	factorbook__E2F4	7.76	r80__500bp_up_and_100bp_down_tss.mc9nr.feather	w0.001	0.5	0.00748165	187.66	3.48033	0.372529	9.34243	9.4152e-21	2.18521e-18	Upregulated	HW_vs_CW	obesity_upregulated
E2f6	Ptprs	TRUE	10	factorbook__E2F4	7.76	r80__500bp_up_and_100bp_down_tss.mc9nr.feather	w0.001	0.3	0.00183057	4106.51	1.48524	0.288089	5.15549	2.52965e-07	4.62511e-06	Upregulated	HW_vs_CW	obesity_upregulated
E2f6	Rab30	TRUE	17	factorbook__E2F4	7.76	r80__500bp_up_and_100bp_down_tss.mc9nr.feather	w0.001	0.7	0.010753	676.16	0.580972	0.17927	3.24077	0.00119208	0.00666967	Upregulated	HW_vs_CW	obesity_upregulated
E2f6	Racgap1	TRUE	17	factorbook__E2F4	7.76	r80__500bp_up_and_100bp_down_tss.mc9nr.feather	w0.001	0.1	0.00375484	488.124	1.44231	0.237923	6.06207	1.34377e-09	4.30355e-08	Upregulated	HW_vs_CW	obesity_upregulated
E2f6	Rad50	TRUE	16	factorbook__E2F4	7.76	r80__500bp_up_and_100bp_down_tss.mc9nr.feather	w0.001	0.5	0.00352996	3111.03	1.48137	0.216462	6.84355	7.72528e-12	3.91785e-10	Upregulated	HW_vs_CW	obesity_upregulated
E2f6	Rad51	TRUE	16	factorbook__E2F4	7.76	r80__500bp_up_and_100bp_down_tss.mc9nr.feather	w0.001	0.5	0.00434604	92.4332	1.30867	0.366173	3.57392	0.000351674	0.00240562	Upregulated	HW_vs_CW	obesity_upregulated
E2f6	Rad51ap1	TRUE	20	factorbook__E2F4	7.76	r80__500bp_up_and_100bp_down_tss.mc9nr.feather	w0.001	0.4	0.00992512	90.8718	1.86993	0.326892	5.72032	1.06322e-08	2.7599e-07	Upregulated	HW_vs_CW	obesity_upregulated
E2f6	Rap2b	TRUE	17	factorbook__E2F4	7.76	r80__500bp_up_and_100bp_down_tss.mc9nr.feather	w0.001	0.1	0.00172675	784.613	0.833447	0.230431	3.61691	0.000298143	0.00209913	Upregulated	HW_vs_CW	obesity_upregulated
E2f6	Rbms3	TRUE	15	factorbook__E2F4	7.76	r80__500bp_up_and_100bp_down_tss.mc9nr.feather	w0.001	0.3	0.00161055	2550.47	0.537446	0.114073	4.71144	2.45975e-06	3.41492e-05	Upregulated	HW_vs_CW	obesity_upregulated
E2f6	Recql	TRUE	10	factorbook__E2F4	7.76	r80__500bp_up_and_100bp_down_tss.mc9nr.feather	w0.001	0.5	0.00314752	1050.49	0.504231	0.129123	3.90505	9.42071e-05	0.000796837	Upregulated	HW_vs_CW	obesity_upregulated
E2f6	Recql4	TRUE	15	factorbook__E2F4	7.76	r80__500bp_up_and_100bp_down_tss.mc9nr.feather	w0.001	0.3	0.00844297	77.8344	0.912525	0.228881	3.9869	6.69431e-05	0.000592272	Upregulated	HW_vs_CW	obesity_upregulated
E2f6	Reep5	TRUE	9	factorbook__E2F4	7.76	r80__500bp_up_and_100bp_down_tss.mc9nr.feather	w0.001	0.1	0.0123053	28288.3	0.8178	0.143878	5.68399	1.31589e-08	3.34533e-07	Upregulated	HW_vs_CW	obesity_upregulated
E2f6	Rel	TRUE	20	factorbook__E2F4	7.76	r80__500bp_up_and_100bp_down_tss.mc9nr.feather	w0.001	0.3	0.00231094	870.514	0.537063	0.184515	2.91067	0.00360656	0.016555	Upregulated	HW_vs_CW	obesity_upregulated
E2f6	Rfc3	TRUE	23	factorbook__E2F4	7.76	r80__500bp_up_and_100bp_down_tss.mc9nr.feather	w0.001	0.3	0.00318674	349.374	0.651626	0.18686	3.48724	0.000488038	0.00315679	Upregulated	HW_vs_CW	obesity_upregulated
E2f6	Rgs10	TRUE	13	factorbook__E2F4	7.76	r80__500bp_up_and_100bp_down_tss.mc9nr.feather	w0.001	0.1	0.00227878	1108.97	0.723456	0.25213	2.86938	0.00411276	0.0184443	Upregulated	HW_vs_CW	obesity_upregulated
E2f6	Rgs7bp	TRUE	14	factorbook__E2F4	7.76	r80__500bp_up_and_100bp_down_tss.mc9nr.feather	w0.001	0.8	0.00623667	898.873	1.01957	0.197861	5.153	2.56357e-07	4.6828e-06	Upregulated	HW_vs_CW	obesity_upregulated
E2f6	Rnaseh2b	TRUE	10	factorbook__E2F4	7.76	r80__500bp_up_and_100bp_down_tss.mc9nr.feather	w0.001	0.3	0.00386817	460.187	0.785362	0.192648	4.07666	4.56868e-05	0.000426959	Upregulated	HW_vs_CW	obesity_upregulated
E2f6	Rnf145	TRUE	30	factorbook__E2F4	7.76	r80__500bp_up_and_100bp_down_tss.mc9nr.feather	w0.001	0.3	0.00572806	5144.88	0.584147	0.167118	3.49542	0.000473321	0.0030853	Upregulated	HW_vs_CW	obesity_upregulated
E2f6	Rock2	TRUE	16	factorbook__E2F4	7.76	r80__500bp_up_and_100bp_down_tss.mc9nr.feather	w0.001	0.3	0.00580137	17341.2	0.579924	0.138281	4.19382	2.74293e-05	0.000277902	Upregulated	HW_vs_CW	obesity_upregulated
E2f6	Rps6ka3	TRUE	23	factorbook__E2F4	7.76	r80__500bp_up_and_100bp_down_tss.mc9nr.feather	w0.001	0.1	0.00534579	13111.4	0.889375	0.149152	5.96289	2.47811e-09	7.45246e-08	Upregulated	HW_vs_CW	obesity_upregulated
E2f6	Rrm2	TRUE	19	factorbook__E2F4	7.76	r80__500bp_up_and_100bp_down_tss.mc9nr.feather	w0.001	0.3	0.00198116	311.624	1.53804	0.302203	5.08942	3.59154e-07	6.29354e-06	Upregulated	HW_vs_CW	obesity_upregulated
E2f6	Rtn4rl1	TRUE	12	factorbook__E2F4	7.76	r80__500bp_up_and_100bp_down_tss.mc9nr.feather	w0.001	0.5	0.0030249	2574.61	1.54571	0.268097	5.7655	8.1414e-09	2.15878e-07	Upregulated	HW_vs_CW	obesity_upregulated
E2f6	Runx2	TRUE	18	factorbook__E2F4	7.76	r80__500bp_up_and_100bp_down_tss.mc9nr.feather	w0.001	0.3	0.00203126	301.031	2.50645	0.456952	5.48515	4.13113e-08	9.41097e-07	Upregulated	HW_vs_CW	obesity_upregulated
E2f6	S1pr2	TRUE	16	factorbook__E2F4	7.76	r80__500bp_up_and_100bp_down_tss.mc9nr.feather	w0.001	0.1	0.00119372	981.389	1.15686	0.292449	3.95578	7.62845e-05	0.000663846	Upregulated	HW_vs_CW	obesity_upregulated
E2f6	Samd5	TRUE	5	factorbook__E2F4	7.76	r80__500bp_up_and_100bp_down_tss.mc9nr.feather	w0.001	0.8	0.00415798	510.859	1.69469	0.214389	7.90473	2.68517e-15	2.54678e-13	Upregulated	HW_vs_CW	obesity_upregulated
E2f6	Sars2	TRUE	13	factorbook__E2F4	7.76	r80__500bp_up_and_100bp_down_tss.mc9nr.feather	w0.001	0.6	0.00840276	466.577	0.721925	0.184991	3.90248	9.52115e-05	0.000802706	Upregulated	HW_vs_CW	obesity_upregulated
E2f6	Sass6	TRUE	21	factorbook__E2F4	7.76	r80__500bp_up_and_100bp_down_tss.mc9nr.feather	w0.001	0.3	0.00326808	126.123	0.842363	0.27384	3.07612	0.00209716	0.0106084	Upregulated	HW_vs_CW	obesity_upregulated
E2f6	Scarf2	TRUE	10	factorbook__E2F4	7.76	r80__500bp_up_and_100bp_down_tss.mc9nr.feather	w0.001	0.3	0.0027126	1258.03	0.512553	0.161334	3.17697	0.00148822	0.00800642	Upregulated	HW_vs_CW	obesity_upregulated
E2f6	Scml2	TRUE	18	factorbook__E2F4	7.76	r80__500bp_up_and_100bp_down_tss.mc9nr.feather	w0.001	0.9	0.0144489	59.5398	1.39265	0.346361	4.02081	5.79986e-05	0.000523181	Upregulated	HW_vs_CW	obesity_upregulated
E2f6	Scn2a	TRUE	14	factorbook__E2F4	7.76	r80__500bp_up_and_100bp_down_tss.mc9nr.feather	w0.001	0.4	0.007788	156.967	0.687502	0.231163	2.9741	0.00293854	0.0140061	Upregulated	HW_vs_CW	obesity_upregulated
E2f6	Sdccag8	TRUE	20	factorbook__E2F4	7.76	r80__500bp_up_and_100bp_down_tss.mc9nr.feather	w0.001	0.8	0.013816	1614.21	0.535701	0.153367	3.49294	0.000477726	0.0031053	Upregulated	HW_vs_CW	obesity_upregulated
E2f6	Sdk1	TRUE	20	factorbook__E2F4	7.76	r80__500bp_up_and_100bp_down_tss.mc9nr.feather	w0.001	0.3	0.00175966	726.045	0.881028	0.241973	3.64102	0.000271561	0.00194177	Upregulated	HW_vs_CW	obesity_upregulated
E2f6	Sec22c	TRUE	12	factorbook__E2F4	7.76	r80__500bp_up_and_100bp_down_tss.mc9nr.feather	w0.001	0.5	0.00720381	917.745	0.642448	0.157719	4.07338	4.63353e-05	0.000431527	Upregulated	HW_vs_CW	obesity_upregulated
E2f6	Sertad4	TRUE	12	factorbook__E2F4	7.76	r80__500bp_up_and_100bp_down_tss.mc9nr.feather	w0.001	0.5	0.00299847	269.249	0.772397	0.302848	2.55044	0.0107587	0.0398286	Upregulated	HW_vs_CW	obesity_upregulated
E2f6	Sfxn5	TRUE	7	factorbook__E2F4	7.76	r80__500bp_up_and_100bp_down_tss.mc9nr.feather	w0.001	0.5	0.0160659	1685.31	0.739838	0.176811	4.18435	2.85982e-05	0.00028785	Upregulated	HW_vs_CW	obesity_upregulated
E2f6	Sh3kbp1	TRUE	8	factorbook__E2F4	7.76	r80__500bp_up_and_100bp_down_tss.mc9nr.feather	w0.001	0.1	0.00236413	4068.95	1.02109	0.205404	4.97112	6.65661e-07	1.07553e-05	Upregulated	HW_vs_CW	obesity_upregulated
E2f6	Skp2	TRUE	18	factorbook__E2F4	7.76	r80__500bp_up_and_100bp_down_tss.mc9nr.feather	w0.001	0.3	0.00853432	244.299	0.924147	0.206948	4.46559	7.98471e-06	9.57583e-05	Upregulated	HW_vs_CW	obesity_upregulated
E2f6	Slc39a11	TRUE	6	factorbook__E2F4	7.76	r80__500bp_up_and_100bp_down_tss.mc9nr.feather	w0.001	0.1	0.00147686	1427.54	1.15771	0.211618	5.47076	4.48116e-08	1.00812e-06	Upregulated	HW_vs_CW	obesity_upregulated
E2f6	Slc39a13	TRUE	8	factorbook__E2F4	7.76	r80__500bp_up_and_100bp_down_tss.mc9nr.feather	w0.001	0.3	0.00373857	2035.56	0.520153	0.120397	4.3203	1.55819e-05	0.000170494	Upregulated	HW_vs_CW	obesity_upregulated
E2f6	Slc41a1	TRUE	10	factorbook__E2F4	7.76	r80__500bp_up_and_100bp_down_tss.mc9nr.feather	w0.001	0.9	0.00493038	3003.83	0.504233	0.146749	3.43603	0.000590314	0.00370529	Upregulated	HW_vs_CW	obesity_upregulated
E2f6	Slc8a3	TRUE	15	factorbook__E2F4	7.76	r80__500bp_up_and_100bp_down_tss.mc9nr.feather	w0.001	0.1	0.00426587	221.877	2.31148	0.832169	2.77765	0.00547531	0.0231696	Upregulated	HW_vs_CW	obesity_upregulated
E2f6	Slco3a1	TRUE	21	factorbook__E2F4	7.76	r80__500bp_up_and_100bp_down_tss.mc9nr.feather	w0.001	0.5	0.00558421	1961.88	0.502284	0.17802	2.8215	0.0047799	0.0207842	Upregulated	HW_vs_CW	obesity_upregulated
E2f6	Slf1	TRUE	18	factorbook__E2F4	7.76	r80__500bp_up_and_100bp_down_tss.mc9nr.feather	w0.001	0.8	0.00410971	856.695	0.658352	0.151504	4.34545	1.3899e-05	0.000154392	Upregulated	HW_vs_CW	obesity_upregulated
E2f6	Slx4ip	TRUE	31	factorbook__E2F4	7.76	r80__500bp_up_and_100bp_down_tss.mc9nr.feather	w0.001	0.1	0.0141621	625.092	0.567742	0.11694	4.85498	1.20397e-06	1.81618e-05	Upregulated	HW_vs_CW	obesity_upregulated
E2f6	Smarca1	TRUE	14	factorbook__E2F4	7.76	r80__500bp_up_and_100bp_down_tss.mc9nr.feather	w0.001	0.5	0.00350175	416.484	2.48186	0.808221	3.07076	0.00213512	0.0107618	Upregulated	HW_vs_CW	obesity_upregulated
E2f6	Smc2	TRUE	19	factorbook__E2F4	7.76	r80__500bp_up_and_100bp_down_tss.mc9nr.feather	w0.001	0.1	0.00646223	741.62	1.27486	0.145558	8.75844	1.97966e-18	3.25456e-16	Upregulated	HW_vs_CW	obesity_upregulated
E2f6	Smc4	TRUE	21	factorbook__E2F4	7.76	r80__500bp_up_and_100bp_down_tss.mc9nr.feather	w0.001	0.3	0.0035252	2106.35	0.916064	0.145798	6.28309	3.31911e-10	1.22851e-08	Upregulated	HW_vs_CW	obesity_upregulated
E2f6	Snai2	TRUE	10	factorbook__E2F4	7.76	r80__500bp_up_and_100bp_down_tss.mc9nr.feather	w0.001	0.3	0.00174753	304.58	0.512654	0.189236	2.70907	0.00674722	0.0274056	Upregulated	HW_vs_CW	obesity_upregulated
E2f6	Sncaip	TRUE	23	factorbook__E2F4	7.76	r80__500bp_up_and_100bp_down_tss.mc9nr.feather	w0.001	0.5	0.0130817	832.421	0.750097	0.179118	4.18773	2.8176e-05	0.00028418	Upregulated	HW_vs_CW	obesity_upregulated
E2f6	Sned1	TRUE	11	factorbook__E2F4	7.76	r80__500bp_up_and_100bp_down_tss.mc9nr.feather	w0.001	0.5	0.00203089	1408.93	0.659247	0.161311	4.0868	4.37369e-05	0.000411327	Upregulated	HW_vs_CW	obesity_upregulated
E2f6	Snx32	TRUE	22	factorbook__E2F4	7.76	r80__500bp_up_and_100bp_down_tss.mc9nr.feather	w0.001	0.8	0.0198245	742.891	0.549664	0.135299	4.06257	4.85347e-05	0.000449106	Upregulated	HW_vs_CW	obesity_upregulated
E2f6	Spc25	TRUE	13	factorbook__E2F4	7.76	r80__500bp_up_and_100bp_down_tss.mc9nr.feather	w0.001	0.1	0.00992117	287.081	1.51332	0.595469	2.54139	0.0110412	0.040607	Upregulated	HW_vs_CW	obesity_upregulated
E2f6	Steap3	TRUE	11	factorbook__E2F4	7.76	r80__500bp_up_and_100bp_down_tss.mc9nr.feather	w0.001	0.3	0.0044634	3994.68	1.27432	0.218519	5.83163	5.48882e-09	1.52084e-07	Upregulated	HW_vs_CW	obesity_upregulated
E2f6	Stim2	TRUE	12	factorbook__E2F4	7.76	r80__500bp_up_and_100bp_down_tss.mc9nr.feather	w0.001	0.3	0.00717891	3058.56	0.677971	0.131838	5.14246	2.7117e-07	4.93055e-06	Upregulated	HW_vs_CW	obesity_upregulated
E2f6	Tbc1d8b	TRUE	11	factorbook__E2F4	7.76	r80__500bp_up_and_100bp_down_tss.mc9nr.feather	w0.001	0.3	0.00422073	1308.54	0.748497	0.0968131	7.73136	1.06405e-14	9.32961e-13	Upregulated	HW_vs_CW	obesity_upregulated
E2f6	Tcf19	TRUE	19	factorbook__E2F4	7.76	r80__500bp_up_and_100bp_down_tss.mc9nr.feather	w0.001	0.5	0.00356071	269.274	1.16634	0.177747	6.56178	5.31701e-11	2.34662e-09	Upregulated	HW_vs_CW	obesity_upregulated
E2f6	Tcf3	TRUE	19	factorbook__E2F4	7.76	r80__500bp_up_and_100bp_down_tss.mc9nr.feather	w0.001	0.3	0.00495058	2415.3	0.504912	0.143249	3.52472	0.000423933	0.00280838	Upregulated	HW_vs_CW	obesity_upregulated
E2f6	Tcirg1	TRUE	9	factorbook__E2F4	7.76	r80__500bp_up_and_100bp_down_tss.mc9nr.feather	w0.001	0.1	0.00225344	4329.2	1.41217	0.274652	5.14168	2.72296e-07	4.94645e-06	Upregulated	HW_vs_CW	obesity_upregulated
E2f6	Tekt2	TRUE	10	factorbook__E2F4	7.76	r80__500bp_up_and_100bp_down_tss.mc9nr.feather	w0.001	0.3	0.00419749	116.027	0.633503	0.232744	2.72189	0.00649091	0.0265284	Upregulated	HW_vs_CW	obesity_upregulated
E2f6	Tenm4	TRUE	25	factorbook__E2F4	7.76	r80__500bp_up_and_100bp_down_tss.mc9nr.feather	w0.001	0.7	0.00808232	13755.5	1.91131	0.292784	6.52806	6.66263e-11	2.88246e-09	Upregulated	HW_vs_CW	obesity_upregulated
E2f6	Tet3	TRUE	27	factorbook__E2F4	7.76	r80__500bp_up_and_100bp_down_tss.mc9nr.feather	w0.001	0.6	0.0105576	5667.6	0.786153	0.182666	4.30377	1.67915e-05	0.000181216	Upregulated	HW_vs_CW	obesity_upregulated
E2f6	Tex9	TRUE	9	factorbook__E2F4	7.76	r80__500bp_up_and_100bp_down_tss.mc9nr.feather	w0.001	0.5	0.00413522	154.604	2.05147	0.366319	5.60025	2.14045e-08	5.19395e-07	Upregulated	HW_vs_CW	obesity_upregulated
E2f6	Tfpi2	TRUE	16	factorbook__E2F4	7.76	r80__500bp_up_and_100bp_down_tss.mc9nr.feather	w0.001	0.3	0.00573404	508.109	2.09379	0.33987	6.16054	7.24955e-10	2.44896e-08	Upregulated	HW_vs_CW	obesity_upregulated
E2f6	Ticrr	TRUE	11	factorbook__E2F4	7.76	r80__500bp_up_and_100bp_down_tss.mc9nr.feather	w0.001	0.4	0.0121002	38.7343	1.95132	0.459377	4.24776	2.15923e-05	0.000225741	Upregulated	HW_vs_CW	obesity_upregulated
E2f6	Timeless	TRUE	24	factorbook__E2F4	7.76	r80__500bp_up_and_100bp_down_tss.mc9nr.feather	w0.001	0.3	0.00506997	784.275	1.04897	0.154847	6.77426	1.25047e-11	6.2139e-10	Upregulated	HW_vs_CW	obesity_upregulated
E2f6	Tll1	TRUE	19	factorbook__E2F4	7.76	r80__500bp_up_and_100bp_down_tss.mc9nr.feather	w0.001	0.3	0.00800117	350.625	1.11597	0.151474	7.36739	1.74004e-13	1.20027e-11	Upregulated	HW_vs_CW	obesity_upregulated
E2f6	Tmem107	TRUE	7	factorbook__E2F4	7.76	r80__500bp_up_and_100bp_down_tss.mc9nr.feather	w0.001	0.5	0.00335214	191.574	0.82263	0.289361	2.84292	0.00447019	0.0197288	Upregulated	HW_vs_CW	obesity_upregulated
E2f6	Tmem165	TRUE	7	factorbook__E2F4	7.76	r80__500bp_up_and_100bp_down_tss.mc9nr.feather	w0.001	0.1	0.00188675	3156.13	0.901391	0.210002	4.29229	1.76841e-05	0.000189399	Upregulated	HW_vs_CW	obesity_upregulated
E2f6	Tmem98	TRUE	16	factorbook__E2F4	7.76	r80__500bp_up_and_100bp_down_tss.mc9nr.feather	w0.001	0.7	0.00577307	1446.15	0.588058	0.188442	3.12063	0.00180464	0.00936895	Upregulated	HW_vs_CW	obesity_upregulated
E2f6	Tnfaip3	TRUE	19	factorbook__E2F4	7.76	r80__500bp_up_and_100bp_down_tss.mc9nr.feather	w0.001	0.2	0.00316967	1378.93	1.08972	0.220469	4.94276	7.70262e-07	1.22054e-05	Upregulated	HW_vs_CW	obesity_upregulated
E2f6	Tonsl	TRUE	11	factorbook__E2F4	7.76	r80__500bp_up_and_100bp_down_tss.mc9nr.feather	w0.001	0.1	0.00105239	130.638	0.584478	0.21247	2.75087	0.0059437	0.0247587	Upregulated	HW_vs_CW	obesity_upregulated
E2f6	Topbp1	TRUE	24	factorbook__E2F4	7.76	r80__500bp_up_and_100bp_down_tss.mc9nr.feather	w0.001	0.3	0.00859054	2190.42	0.649875	0.130371	4.9848	6.20245e-07	1.01714e-05	Upregulated	HW_vs_CW	obesity_upregulated
E2f6	Tpm3	TRUE	9	factorbook__E2F4	7.76	r80__500bp_up_and_100bp_down_tss.mc9nr.feather	w0.001	0.1	0.00292843	14732.7	0.508278	0.134598	3.77626	0.000159199	0.00124581	Upregulated	HW_vs_CW	obesity_upregulated
E2f6	Tril	TRUE	14	factorbook__E2F4	7.76	r80__500bp_up_and_100bp_down_tss.mc9nr.feather	w0.001	0.3	0.00351519	1277.02	0.614954	0.220119	2.79373	0.00521035	0.0222609	Upregulated	HW_vs_CW	obesity_upregulated
E2f6	Trim35	TRUE	13	factorbook__E2F4	7.76	r80__500bp_up_and_100bp_down_tss.mc9nr.feather	w0.001	0.8	0.00768473	6291.89	0.789981	0.170255	4.63998	3.48436e-06	4.61649e-05	Upregulated	HW_vs_CW	obesity_upregulated
E2f6	Trim59	TRUE	7	factorbook__E2F4	7.76	r80__500bp_up_and_100bp_down_tss.mc9nr.feather	w0.001	0.4	0.0047339	153.412	1.2061	0.264955	4.5521	5.31141e-06	6.69971e-05	Upregulated	HW_vs_CW	obesity_upregulated
E2f6	Trip13	TRUE	13	factorbook__E2F4	7.76	r80__500bp_up_and_100bp_down_tss.mc9nr.feather	w0.001	0.3	0.00117435	84.4469	1.18792	0.331719	3.5811	0.000342148	0.00235434	Upregulated	HW_vs_CW	obesity_upregulated
E2f6	Tsc22d1	TRUE	20	factorbook__E2F4	7.76	r80__500bp_up_and_100bp_down_tss.mc9nr.feather	w0.001	0.9	0.00343737	17514.7	0.729001	0.261246	2.79047	0.00526308	0.0224207	Upregulated	HW_vs_CW	obesity_upregulated
E2f6	Tspan6	TRUE	11	factorbook__E2F4	7.76	r80__500bp_up_and_100bp_down_tss.mc9nr.feather	w0.001	0.5	0.00696503	1314.92	0.792151	0.218696	3.62215	0.000292167	0.00206442	Upregulated	HW_vs_CW	obesity_upregulated
E2f6	Ttc12	TRUE	7	factorbook__E2F4	7.76	r80__500bp_up_and_100bp_down_tss.mc9nr.feather	w0.001	0.5	0.00383368	416.405	0.648733	0.225759	2.87356	0.00405874	0.0182477	Upregulated	HW_vs_CW	obesity_upregulated
E2f6	Txndc16	TRUE	14	factorbook__E2F4	7.76	r80__500bp_up_and_100bp_down_tss.mc9nr.feather	w0.001	0.5	0.00278279	2878.56	0.512652	0.126209	4.06193	4.86693e-05	0.000449928	Upregulated	HW_vs_CW	obesity_upregulated
E2f6	Ubtd2	TRUE	6	factorbook__E2F4	7.76	r80__500bp_up_and_100bp_down_tss.mc9nr.feather	w0.001	0.3	0.0013179	466.977	0.51541	0.190371	2.7074	0.00678126	0.0275043	Upregulated	HW_vs_CW	obesity_upregulated
E2f6	Uhrf1	TRUE	23	factorbook__E2F4	7.76	r80__500bp_up_and_100bp_down_tss.mc9nr.feather	w0.001	0.1	0.00208176	363.147	1.68097	0.242581	6.92955	4.22175e-12	2.23289e-10	Upregulated	HW_vs_CW	obesity_upregulated
E2f6	Vgll3	TRUE	4	factorbook__E2F4	7.76	r80__500bp_up_and_100bp_down_tss.mc9nr.feather	w0.001	0.1	0.00391781	5311.57	1.29984	0.400622	3.24457	0.00117628	0.00659625	Upregulated	HW_vs_CW	obesity_upregulated
E2f6	Vldlr	TRUE	16	factorbook__E2F4	7.76	r80__500bp_up_and_100bp_down_tss.mc9nr.feather	w0.001	0.7	0.0303461	11139.1	0.614377	0.212262	2.89443	0.00379852	0.0172428	Upregulated	HW_vs_CW	obesity_upregulated
E2f6	Wdr62	TRUE	19	factorbook__E2F4	7.76	r80__500bp_up_and_100bp_down_tss.mc9nr.feather	w0.001	0.3	0.00621985	1107.38	0.691034	0.243053	2.84315	0.00446704	0.0197193	Upregulated	HW_vs_CW	obesity_upregulated
E2f6	Wdr76	TRUE	17	factorbook__E2F4	7.76	r80__500bp_up_and_100bp_down_tss.mc9nr.feather	w0.001	0.3	0.00558625	331.69	0.556497	0.207048	2.68777	0.00719304	0.0288189	Upregulated	HW_vs_CW	obesity_upregulated
E2f6	Wipf1	TRUE	14	factorbook__E2F4	7.76	r80__500bp_up_and_100bp_down_tss.mc9nr.feather	w0.001	0.1	0.00359129	4387.26	0.614068	0.201573	3.04639	0.00231608	0.01151	Upregulated	HW_vs_CW	obesity_upregulated
E2f6	Xkr6	TRUE	18	factorbook__E2F4	7.76	r80__500bp_up_and_100bp_down_tss.mc9nr.feather	w0.001	0.3	0.00387642	157.341	1.08628	0.404876	2.68301	0.00729637	0.0291618	Upregulated	HW_vs_CW	obesity_upregulated
E2f6	Xrcc2	TRUE	17	factorbook__E2F4	7.76	r80__500bp_up_and_100bp_down_tss.mc9nr.feather	w0.001	0.3	0.00534472	563.901	0.581188	0.152189	3.81886	0.000134068	0.00107298	Upregulated	HW_vs_CW	obesity_upregulated
E2f6	Zc4h2	TRUE	8	factorbook__E2F4	7.76	r80__500bp_up_and_100bp_down_tss.mc9nr.feather	w0.001	0.5	0.00236937	277.34	0.644596	0.219063	2.94251	0.00325561	0.0152775	Upregulated	HW_vs_CW	obesity_upregulated
E2f6	Zeb2	TRUE	21	factorbook__E2F4	7.76	r80__500bp_up_and_100bp_down_tss.mc9nr.feather	w0.001	0.1	0.00331847	13623.4	0.849766	0.225525	3.76795	0.000164592	0.00127938	Upregulated	HW_vs_CW	obesity_upregulated
E2f6	Zfp414	TRUE	10	factorbook__E2F4	7.76	r80__500bp_up_and_100bp_down_tss.mc9nr.feather	w0.001	0.3	0.00646034	535.163	0.533888	0.180276	2.96151	0.00306136	0.0145075	Upregulated	HW_vs_CW	obesity_upregulated
E2f6	Zfp423	TRUE	18	factorbook__E2F4	7.76	r80__500bp_up_and_100bp_down_tss.mc9nr.feather	w0.001	0.1	0.00412317	3672.15	0.620015	0.242983	2.55168	0.0107206	0.0397251	Upregulated	HW_vs_CW	obesity_upregulated
E2f6	Zgrf1	TRUE	14	factorbook__E2F4	7.76	r80__500bp_up_and_100bp_down_tss.mc9nr.feather	w0.001	0.5	0.00426514	187.512	0.877423	0.262569	3.34169	0.0008327	0.0049456	Upregulated	HW_vs_CW	obesity_upregulated
E2f6	Zranb3	TRUE	16	factorbook__E2F4	7.76	r80__500bp_up_and_100bp_down_tss.mc9nr.feather	w0.001	0.1	0.00479525	613.01	1.67434	0.282664	5.92344	3.15281e-09	9.26954e-08	Upregulated	HW_vs_CW	obesity_upregulated
E2f6	Zwilch	TRUE	18	factorbook__E2F4	7.76	r80__500bp_up_and_100bp_down_tss.mc9nr.feather	w0.001	0.3	0.00245104	149.743	1.48011	0.26275	5.63314	1.76956e-08	4.35828e-07	Upregulated	HW_vs_CW	obesity_upregulated
E2f6	A730020E08Rik	TRUE	12	transfac_pro__M08875	4.18	r80__500bp_up_and_100bp_down_tss.mc9nr.feather	w0.001	0.666886	0.00733694	25.2191	1.42892	0.436061	3.27688	0.00104961	0.00599847	Upregulated	HW_vs_CW	obesity_upregulated
E2f6	Akirin1	TRUE	4	transfac_pro__M08875	4.18	r80__500bp_up_and_100bp_down_tss.mc9nr.feather	w0.001	0.1	0.00447663	4537.38	0.641876	0.127641	5.02874	4.93711e-07	8.34612e-06	Upregulated	HW_vs_CW	obesity_upregulated
E2f6	Alg3	TRUE	16	transfac_pro__M08875	4.18	r80__500bp_up_and_100bp_down_tss.mc9nr.feather	w0.001	0.8	0.00705073	749.361	0.729412	0.174057	4.19064	2.78168e-05	0.000281132	Upregulated	HW_vs_CW	obesity_upregulated
E2f6	B130024G19Rik	TRUE	12	transfac_pro__M08875	4.18	r80__500bp_up_and_100bp_down_tss.mc9nr.feather	w0.001	0.5	0.00205925	136.854	0.849417	0.310497	2.73567	0.00622541	0.0257258	Upregulated	HW_vs_CW	obesity_upregulated
E2f6	Cdk6	TRUE	12	transfac_pro__M08875	4.18	r80__500bp_up_and_100bp_down_tss.mc9nr.feather	w0.001	0.3	0.00478756	1224.96	0.546773	0.205221	2.66431	0.00771462	0.0305059	Upregulated	HW_vs_CW	obesity_upregulated
E2f6	Cfl1	TRUE	11	transfac_pro__M08875	4.18	r80__500bp_up_and_100bp_down_tss.mc9nr.feather	w0.001	0.1	0.00167708	18964.2	0.58941	0.167724	3.51417	0.000441138	0.00290389	Upregulated	HW_vs_CW	obesity_upregulated
E2f6	Disp1	TRUE	14	transfac_pro__M08875	4.18	r80__500bp_up_and_100bp_down_tss.mc9nr.feather	w0.001	0.5	0.00246093	885.351	0.716923	0.189713	3.779	0.000157462	0.00123368	Upregulated	HW_vs_CW	obesity_upregulated
E2f6	Epb41l2	TRUE	18	transfac_pro__M08875	4.18	r80__500bp_up_and_100bp_down_tss.mc9nr.feather	w0.001	0.5	0.00426853	31156.5	1.38411	0.195319	7.0864	1.37649e-12	7.96343e-11	Upregulated	HW_vs_CW	obesity_upregulated
E2f6	Hoxc5	TRUE	15	transfac_pro__M08875	4.18	r80__500bp_up_and_100bp_down_tss.mc9nr.feather	w0.001	0.7	0.00930512	785.687	0.887448	0.176587	5.02554	5.02006e-07	8.45736e-06	Upregulated	HW_vs_CW	obesity_upregulated
E2f6	Inhbb	TRUE	8	transfac_pro__M08875	4.18	r80__500bp_up_and_100bp_down_tss.mc9nr.feather	w0.001	0.1	0.00211245	3427.91	0.596045	0.215888	2.7609	0.00576429	0.024149	Upregulated	HW_vs_CW	obesity_upregulated
E2f6	Mapk11	TRUE	3	transfac_pro__M08875	4.18	r80__500bp_up_and_100bp_down_tss.mc9nr.feather	w0.001	0.3	0.00320499	504.982	0.60169	0.178824	3.36471	0.00076625	0.00461153	Upregulated	HW_vs_CW	obesity_upregulated
E2f6	Mex3b	TRUE	8	transfac_pro__M08875	4.18	r80__500bp_up_and_100bp_down_tss.mc9nr.feather	w0.001	0.1	0.0022192	250.41	0.650302	0.245938	2.64417	0.00818903	0.0320288	Upregulated	HW_vs_CW	obesity_upregulated
E2f6	Nup93	TRUE	13	transfac_pro__M08875	4.18	r80__500bp_up_and_100bp_down_tss.mc9nr.feather	w0.001	0.4	0.0086744	1630.02	0.67822	0.214138	3.1672	0.00153913	0.00823786	Upregulated	HW_vs_CW	obesity_upregulated
E2f6	Parp3	TRUE	3	transfac_pro__M08875	4.18	r80__500bp_up_and_100bp_down_tss.mc9nr.feather	w0.001	0.3	0.00478837	6200.72	1.09178	0.174633	6.25188	4.05546e-10	1.4707e-08	Upregulated	HW_vs_CW	obesity_upregulated
E2f6	Rab8b	TRUE	9	transfac_pro__M08875	4.18	r80__500bp_up_and_100bp_down_tss.mc9nr.feather	w0.001	0.1	0.00132501	5584.69	0.713122	0.201469	3.53962	0.000400707	0.00267518	Upregulated	HW_vs_CW	obesity_upregulated
E2f6	Sh3bgrl	TRUE	9	transfac_pro__M08875	4.18	r80__500bp_up_and_100bp_down_tss.mc9nr.feather	w0.001	0.3	0.00546218	17267.4	0.780469	0.147989	5.27383	1.33607e-07	2.66511e-06	Upregulated	HW_vs_CW	obesity_upregulated
E2f6	Spats2	TRUE	16	transfac_pro__M08875	4.18	r80__500bp_up_and_100bp_down_tss.mc9nr.feather	w0.001	0.8	0.0123913	1338.6	0.527531	0.120661	4.37201	1.2311e-05	0.000137996	Upregulated	HW_vs_CW	obesity_upregulated
E2f6	Tram2	TRUE	16	transfac_pro__M08875	4.18	r80__500bp_up_and_100bp_down_tss.mc9nr.feather	w0.001	0.1	0.00620999	1217.33	0.644775	0.240222	2.68408	0.00727296	0.0291036	Upregulated	HW_vs_CW	obesity_upregulated
E2f6	Wdr44	TRUE	6	transfac_pro__M08875	4.18	r80__500bp_up_and_100bp_down_tss.mc9nr.feather	w0.001	0.9	0.0126398	1028.27	0.522749	0.148366	3.52338	0.000426072	0.00281782	Upregulated	HW_vs_CW	obesity_upregulated
E2f6	Abcb4	TRUE	3	cisbp__M4672	3.71	r80__500bp_up_and_100bp_down_tss.mc9nr.feather	w0.005	0.7	0.0173455	505.187	1.49929	0.466317	3.21518	0.00130362	0.00718316	Upregulated	HW_vs_CW	obesity_upregulated
E2f6	Acyp1	TRUE	2	cisbp__M4672	3.71	r80__500bp_up_and_100bp_down_tss.mc9nr.feather	w0.005	0.9	0.0187833	729.44	0.611529	0.218679	2.79647	0.00516636	0.0221233	Upregulated	HW_vs_CW	obesity_upregulated
E2f6	Aplnr	TRUE	3	cisbp__M4672	3.71	r80__500bp_up_and_100bp_down_tss.mc9nr.feather	w0.005	0.3	0.00638603	2869.35	2.70069	0.330819	8.16367	3.25008e-16	3.52294e-14	Upregulated	HW_vs_CW	obesity_upregulated
E2f6	Dock10	TRUE	15	cisbp__M4672	3.71	r80__500bp_up_and_100bp_down_tss.mc9nr.feather	w0.005	0.3	0.00668591	3252.78	1.22306	0.216768	5.64226	1.67833e-08	4.14394e-07	Upregulated	HW_vs_CW	obesity_upregulated
E2f6	Dynll1	TRUE	4	cisbp__M4672	3.71	r80__500bp_up_and_100bp_down_tss.mc9nr.feather	w0.005	0.8	0.00684505	5822.95	0.564763	0.134291	4.20552	2.60484e-05	0.000265435	Upregulated	HW_vs_CW	obesity_upregulated
E2f6	Ect2	TRUE	8	cisbp__M4672	3.71	r80__500bp_up_and_100bp_down_tss.mc9nr.feather	w0.005	0.1	0.00851	176.066	1.30804	0.303509	4.30972	1.63459e-05	0.000177182	Upregulated	HW_vs_CW	obesity_upregulated
E2f6	Glcci1	TRUE	1	cisbp__M4672	3.71	r80__500bp_up_and_100bp_down_tss.mc9nr.feather	w0.005	0.1	0.00995538	95.5024	1.20599	0.387827	3.1096	0.00187339	0.00966479	Upregulated	HW_vs_CW	obesity_upregulated
E2f6	Haglr	TRUE	7	cisbp__M4672	3.71	r80__500bp_up_and_100bp_down_tss.mc9nr.feather	w0.005	0.4	0.0124117	26.6396	2.21388	0.718947	3.07934	0.00207458	0.010513	Upregulated	HW_vs_CW	obesity_upregulated
E2f6	Hdac9	TRUE	5	cisbp__M4672	3.71	r80__500bp_up_and_100bp_down_tss.mc9nr.feather	w0.005	0.5	0.00703729	813.247	1.33914	0.182387	7.34229	2.09972e-13	1.40896e-11	Upregulated	HW_vs_CW	obesity_upregulated
E2f6	Igfbp5	TRUE	17	cisbp__M4672	3.71	r80__500bp_up_and_100bp_down_tss.mc9nr.feather	w0.005	0.9	0.0117314	32785.5	0.792131	0.195692	4.04785	5.16909e-05	0.000472967	Upregulated	HW_vs_CW	obesity_upregulated
E2f6	Lrsam1	TRUE	4	cisbp__M4672	3.71	r80__500bp_up_and_100bp_down_tss.mc9nr.feather	w0.005	0.8	0.00618491	1548	0.511632	0.114391	4.47267	7.72495e-06	9.3039e-05	Upregulated	HW_vs_CW	obesity_upregulated
E2f6	Mageb18	TRUE	8	cisbp__M4672	3.71	r80__500bp_up_and_100bp_down_tss.mc9nr.feather	w0.005	0.1	0.00824611	189.808	2.9353	0.731979	4.01009	6.06964e-05	0.000544281	Upregulated	HW_vs_CW	obesity_upregulated
E2f6	Maged1	TRUE	6	cisbp__M4672	3.71	r80__500bp_up_and_100bp_down_tss.mc9nr.feather	w0.005	0.9	0.00775182	15686.7	0.641756	0.101191	6.34203	2.2675e-10	8.87565e-09	Upregulated	HW_vs_CW	obesity_upregulated
E2f6	Mst1r	TRUE	5	cisbp__M4672	3.71	r80__500bp_up_and_100bp_down_tss.mc9nr.feather	w0.005	0.7	0.0126926	1914.07	0.905696	0.269631	3.35902	0.000782204	0.00469894	Upregulated	HW_vs_CW	obesity_upregulated
E2f6	Nin	TRUE	16	cisbp__M4672	3.71	r80__500bp_up_and_100bp_down_tss.mc9nr.feather	w0.005	0.3	0.00828554	4311.75	0.575738	0.101396	5.67813	1.36175e-08	3.44418e-07	Upregulated	HW_vs_CW	obesity_upregulated
E2f6	Oxct1	TRUE	6	cisbp__M4672	3.71	r80__500bp_up_and_100bp_down_tss.mc9nr.feather	w0.005	0.6	0.00673272	20017.5	0.525195	0.139086	3.77604	0.000159339	0.00124591	Upregulated	HW_vs_CW	obesity_upregulated
E2f6	Parp14	TRUE	3	cisbp__M4672	3.71	r80__500bp_up_and_100bp_down_tss.mc9nr.feather	w0.005	0.7	0.00606436	6507.3	0.557328	0.187638	2.97023	0.00297574	0.0141493	Upregulated	HW_vs_CW	obesity_upregulated
E2f6	Phf8	TRUE	17	cisbp__M4672	3.71	r80__500bp_up_and_100bp_down_tss.mc9nr.feather	w0.005	0.3	0.00574737	6404.81	0.750822	0.285171	2.63289	0.00846619	0.0329358	Upregulated	HW_vs_CW	obesity_upregulated
E2f6	Rcor2	TRUE	8	cisbp__M4672	3.71	r80__500bp_up_and_100bp_down_tss.mc9nr.feather	w0.005	0.5	0.00949725	293.199	1.60355	0.327373	4.89823	9.67032e-07	1.48928e-05	Upregulated	HW_vs_CW	obesity_upregulated
E2f6	Rrm1	TRUE	18	cisbp__M4672	3.71	r80__500bp_up_and_100bp_down_tss.mc9nr.feather	w0.005	0.3	0.0106208	1745.52	0.50975	0.0958144	5.32018	1.03662e-07	2.12804e-06	Upregulated	HW_vs_CW	obesity_upregulated
E2f6	Sall4	TRUE	16	cisbp__M4672	3.71	r80__500bp_up_and_100bp_down_tss.mc9nr.feather	w0.005	0.4	0.00574642	23.122	2.06265	0.713606	2.89046	0.00384681	0.0174183	Upregulated	HW_vs_CW	obesity_upregulated
E2f6	Slc6a13	TRUE	1	cisbp__M4672	3.71	r80__500bp_up_and_100bp_down_tss.mc9nr.feather	w0.005	0.5	0.00510773	4376.86	1.93527	0.363001	5.33132	9.74996e-08	2.02684e-06	Upregulated	HW_vs_CW	obesity_upregulated
E2f6	Snrpn	TRUE	10	cisbp__M4672	3.71	r80__500bp_up_and_100bp_down_tss.mc9nr.feather	w0.005	0.6	0.016349	665.302	0.728681	0.205145	3.55204	0.000382259	0.00257643	Upregulated	HW_vs_CW	obesity_upregulated
E2f6	St3gal2	TRUE	5	cisbp__M4672	3.71	r80__500bp_up_and_100bp_down_tss.mc9nr.feather	w0.005	0.9	0.00538769	3949.98	0.553124	0.186215	2.97036	0.00297453	0.014147	Upregulated	HW_vs_CW	obesity_upregulated
E2f6	Stc2	TRUE	15	cisbp__M4672	3.71	r80__500bp_up_and_100bp_down_tss.mc9nr.feather	w0.005	1	0.0242949	1015.6	1.1666	0.252289	4.62404	3.76338e-06	4.95289e-05	Upregulated	HW_vs_CW	obesity_upregulated
E2f6	Tfrc	TRUE	11	cisbp__M4672	3.71	r80__500bp_up_and_100bp_down_tss.mc9nr.feather	w0.005	1	0.00839411	1648.94	1.09203	0.208921	5.22701	1.72275e-07	3.31899e-06	Upregulated	HW_vs_CW	obesity_upregulated
E2f6	Bhlhe41	TRUE	12	dbcorrdb__E2F6__ENCSR000EWJ_1__m1	3.39	r80__10kb_up_and_down_tss.mc9nr.feather	top1sd	0.9	0.0386974	799.328	2.48351	0.268996	9.23252	2.64346e-20	5.60754e-18	Upregulated	HW_vs_CW	obesity_upregulated
E2f6	Cacna2d1	TRUE	10	dbcorrdb__E2F6__ENCSR000EWJ_1__m1	3.39	r80__10kb_up_and_down_tss.mc9nr.feather	top1sd	0.5	0.0164433	3318.25	1.85	0.565811	3.26964	0.00107684	0.0061257	Upregulated	HW_vs_CW	obesity_upregulated
E2f6	Cpeb3	TRUE	6	dbcorrdb__E2F6__ENCSR000EWJ_1__m1	3.39	r80__10kb_up_and_down_tss.mc9nr.feather	top1sd	0.9	0.0173359	1772.88	0.531387	0.181701	2.92451	0.00345003	0.0159846	Upregulated	HW_vs_CW	obesity_upregulated
E2f6	Dll4	TRUE	15	dbcorrdb__E2F6__ENCSR000EWJ_1__m1	3.39	r80__10kb_up_and_down_tss.mc9nr.feather	top1sd	0.9	0.0173439	1440.02	1.24188	0.0975079	12.7362	3.72046e-37	4.07762e-34	Upregulated	HW_vs_CW	obesity_upregulated
E2f6	Erg	TRUE	17	dbcorrdb__E2F6__ENCSR000EWJ_1__m1	3.39	r80__10kb_up_and_down_tss.mc9nr.feather	top1sd	0.9	0.01247	3107.15	0.709088	0.138683	5.11303	3.17036e-07	5.67012e-06	Upregulated	HW_vs_CW	obesity_upregulated
E2f6	Nr1d1	TRUE	16	dbcorrdb__E2F6__ENCSR000EWJ_1__m1	3.39	r80__10kb_up_and_down_tss.mc9nr.feather	top1sd	1	0.0238789	9327.87	1.70247	0.199351	8.54006	1.34149e-17	1.82517e-15	Upregulated	HW_vs_CW	obesity_upregulated
E2f6	Slco5a1	TRUE	18	dbcorrdb__E2F6__ENCSR000EWJ_1__m1	3.39	r80__10kb_up_and_down_tss.mc9nr.feather	top1sd	0.6	0.01731	116.256	2.71336	0.837849	3.23848	0.00120169	0.00671394	Upregulated	HW_vs_CW	obesity_upregulated
E2f6	Zfp41	TRUE	7	dbcorrdb__E2F6__ENCSR000EWJ_1__m1	3.39	r80__10kb_up_and_down_tss.mc9nr.feather	top1sd	0.7	0.0166551	508.527	0.662536	0.193793	3.41879	0.000629003	0.00390711	Upregulated	HW_vs_CW	obesity_upregulated
E2f6	9530052E02Rik	TRUE	10	cisbp__M4615	3.1	r80__10kb_up_and_down_tss.mc9nr.feather	w0.005	0.4	0.00696407	26.4682	5.07393	1.13494	4.47066	7.79797e-06	9.38611e-05	Upregulated	HW_vs_CW	obesity_upregulated
E2f6	A930003O13Rik	TRUE	8	cisbp__M4615	3.1	r80__10kb_up_and_down_tss.mc9nr.feather	w0.005	0.3	0.00763513	23.2856	1.0556	0.426827	2.47314	0.0133932	0.0474196	Upregulated	HW_vs_CW	obesity_upregulated
E2f6	Bard1	TRUE	16	cisbp__M4615	3.1	r80__10kb_up_and_down_tss.mc9nr.feather	w0.005	0.359092	0.00592186	61.8934	1.48042	0.368202	4.02067	5.80337e-05	0.000523259	Upregulated	HW_vs_CW	obesity_upregulated
E2f6	Camk2a	TRUE	14	cisbp__M4615	3.1	r80__10kb_up_and_down_tss.mc9nr.feather	w0.005	0.0512989	0.0070074	1808.35	3.31096	1.31928	2.50967	0.0120844	0.0436792	Upregulated	HW_vs_CW	obesity_upregulated
E2f6	Cnga3	TRUE	10	cisbp__M4615	3.1	r80__10kb_up_and_down_tss.mc9nr.feather	w0.005	0.718185	0.00884451	12.5698	6.86057	1.84234	3.72383	0.000196221	0.00148772	Upregulated	HW_vs_CW	obesity_upregulated
E2f6	Daam1	TRUE	22	cisbp__M4615	3.1	r80__10kb_up_and_down_tss.mc9nr.feather	w0.005	0.3	0.00519584	3486.85	0.546531	0.105425	5.18408	2.17089e-07	4.04412e-06	Upregulated	HW_vs_CW	obesity_upregulated
E2f6	Dcbld2	TRUE	20	cisbp__M4615	3.1	r80__10kb_up_and_down_tss.mc9nr.feather	w0.005	0.1	0.00597657	3248.06	0.888452	0.183293	4.84717	1.25234e-06	1.88075e-05	Upregulated	HW_vs_CW	obesity_upregulated
E2f6	Ehd2	TRUE	4	cisbp__M4615	3.1	r80__10kb_up_and_down_tss.mc9nr.feather	w0.005	0.1	0.00510394	62426.8	0.789839	0.223789	3.5294	0.000416507	0.00276993	Upregulated	HW_vs_CW	obesity_upregulated
E2f6	Epha4	TRUE	9	cisbp__M4615	3.1	r80__10kb_up_and_down_tss.mc9nr.feather	w0.005	0.9	0.00517204	361.771	0.791891	0.193153	4.09981	4.13481e-05	0.000393306	Upregulated	HW_vs_CW	obesity_upregulated
E2f6	Filip1	TRUE	9	cisbp__M4615	3.1	r80__10kb_up_and_down_tss.mc9nr.feather	w0.005	0.9	0.021999	1861.4	0.749396	0.240837	3.11164	0.00186052	0.00961349	Upregulated	HW_vs_CW	obesity_upregulated
E2f6	Gm15326	TRUE	6	cisbp__M4615	3.1	r80__10kb_up_and_down_tss.mc9nr.feather	w0.005	0.3	0.00605751	61.9984	2.0165	0.586738	3.4368	0.00058863	0.00369707	Upregulated	HW_vs_CW	obesity_upregulated
E2f6	Kcne1l	TRUE	2	cisbp__M4615	3.1	r80__10kb_up_and_down_tss.mc9nr.feather	w0.005	0.5	0.00645455	266.885	2.10855	0.40105	5.25756	1.45978e-07	2.88608e-06	Upregulated	HW_vs_CW	obesity_upregulated
E2f6	Kcnj2	TRUE	15	cisbp__M4615	3.1	r80__10kb_up_and_down_tss.mc9nr.feather	w0.005	0.9	0.0113938	496.91	1.81606	0.468985	3.87232	0.000107806	0.000893987	Upregulated	HW_vs_CW	obesity_upregulated
E2f6	Ncor2	TRUE	9	cisbp__M4615	3.1	r80__10kb_up_and_down_tss.mc9nr.feather	w0.005	0.8	0.00791035	8371.55	0.508756	0.0824863	6.16777	6.92597e-10	2.36803e-08	Upregulated	HW_vs_CW	obesity_upregulated
E2f6	Nfic	TRUE	17	cisbp__M4615	3.1	r80__10kb_up_and_down_tss.mc9nr.feather	w0.005	0.8	0.00855021	8834.47	0.638184	0.134715	4.7373	2.16587e-06	3.04984e-05	Upregulated	HW_vs_CW	obesity_upregulated
E2f6	Pdgfa	TRUE	8	cisbp__M4615	3.1	r80__10kb_up_and_down_tss.mc9nr.feather	w0.005	0.410391	0.00600925	837.872	0.843135	0.191895	4.39373	1.11425e-05	0.000127063	Upregulated	HW_vs_CW	obesity_upregulated
E2f6	Slc48a1	TRUE	1	cisbp__M4615	3.1	r80__10kb_up_and_down_tss.mc9nr.feather	w0.005	0.1	0.00962877	17125.5	0.767143	0.216811	3.5383	0.000402716	0.00268768	Upregulated	HW_vs_CW	obesity_upregulated
E2f6	Sytl4	TRUE	13	cisbp__M4615	3.1	r80__10kb_up_and_down_tss.mc9nr.feather	w0.005	0.9	0.00796791	524.784	1.21168	0.33282	3.64063	0.000271967	0.00194397	Upregulated	HW_vs_CW	obesity_upregulated
E2f6	Tmem88	TRUE	1	cisbp__M4615	3.1	r80__10kb_up_and_down_tss.mc9nr.feather	w0.005	0.9	0.00823688	1276.14	0.673224	0.136181	4.94361	7.66887e-07	1.21617e-05	Upregulated	HW_vs_CW	obesity_upregulated
E2f6	Trpc3	TRUE	11	cisbp__M4615	3.1	r80__10kb_up_and_down_tss.mc9nr.feather	w0.005	0.3	0.0155186	285.913	0.85744	0.221565	3.86993	0.000108867	0.000902029	Upregulated	HW_vs_CW	obesity_upregulated
E2f6	Tuba1b	TRUE	18	cisbp__M4615	3.1	r80__10kb_up_and_down_tss.mc9nr.feather	w0.005	0.9	0.0202234	9590.57	0.725109	0.257341	2.8177	0.0048369	0.0209759	Upregulated	HW_vs_CW	obesity_upregulated
E2f6	Zfp862-ps	TRUE	6	cisbp__M4615	3.1	r80__10kb_up_and_down_tss.mc9nr.feather	w0.005	0.8	0.0107289	1172.92	0.652011	0.152012	4.2892	1.79317e-05	0.000191427	Upregulated	HW_vs_CW	obesity_upregulated
E2f6	Znrf2	TRUE	11	cisbp__M4615	3.1	r80__10kb_up_and_down_tss.mc9nr.feather	w0.005	0.5	0.0050252	7516.85	0.604884	0.0979927	6.17275	6.71124e-10	2.2986e-08	Upregulated	HW_vs_CW	obesity_upregulated
E2f6	Bhlhe40	TRUE	9	hocomoco__E2F6_HUMAN.H11MO.0.A	3.09	r80__10kb_up_and_down_tss.mc9nr.feather	top5perTarget	0.7	0.0268593	2320.51	1.43227	0.346172	4.13746	3.51166e-05	0.000342419	Upregulated	HW_vs_CW	obesity_upregulated
E2f6	Hipk2	TRUE	12	tfdimers__MD00456	3.03	r80__10kb_up_and_down_tss.mc9nr.feather	top10perTarget	0.7	0.0239053	10674.3	0.934658	0.190646	4.90257	9.45888e-07	1.46013e-05	Upregulated	HW_vs_CW	obesity_upregulated
E2f6	Snhg14	TRUE	1	tfdimers__MD00456	3.03	r80__10kb_up_and_down_tss.mc9nr.feather	top10perTarget	0.8	0.0290775	175.854	0.760022	0.218063	3.48533	0.000491535	0.00317414	Upregulated	HW_vs_CW	obesity_upregulated
E2f8	2210016F16Rik	TRUE	1	taipale_cyt_meth__E2F8_NTTTCCCGCCAAAN_eDBD	4.67	r80__500bp_up_and_100bp_down_tss.mc9nr.feather	w0.001	0.5	0.00330681	2762.56	0.508754	0.162453	3.13169	0.00173804	0.00907812	Upregulated	HW_vs_CW	obesity_upregulated
E2f8	2510009E07Rik	TRUE	4	taipale_cyt_meth__E2F8_NTTTCCCGCCAAAN_eDBD	4.67	r80__500bp_up_and_100bp_down_tss.mc9nr.feather	w0.001	0.1	0.00264552	2746.87	0.699672	0.164899	4.24303	2.20525e-05	0.000229942	Upregulated	HW_vs_CW	obesity_upregulated
E2f8	4930579G24Rik	TRUE	4	taipale_cyt_meth__E2F8_NTTTCCCGCCAAAN_eDBD	4.67	r80__500bp_up_and_100bp_down_tss.mc9nr.feather	w0.001	0.3	0.00248951	138.194	0.919723	0.196711	4.6755	2.93232e-06	3.99785e-05	Upregulated	HW_vs_CW	obesity_upregulated
E2f8	A230028O05Rik	TRUE	2	taipale_cyt_meth__E2F8_NTTTCCCGCCAAAN_eDBD	4.67	r80__500bp_up_and_100bp_down_tss.mc9nr.feather	w0.001	0.9	0.00888771	37.0636	2.95247	0.629753	4.68831	2.75474e-06	3.77779e-05	Upregulated	HW_vs_CW	obesity_upregulated
E2f8	Adamts17	TRUE	4	taipale_cyt_meth__E2F8_NTTTCCCGCCAAAN_eDBD	4.67	r80__500bp_up_and_100bp_down_tss.mc9nr.feather	w0.001	0.3	0.00201198	92.8925	2.13255	0.472765	4.5108	6.45849e-06	7.97828e-05	Upregulated	HW_vs_CW	obesity_upregulated
E2f8	Adamts5	TRUE	4	taipale_cyt_meth__E2F8_NTTTCCCGCCAAAN_eDBD	4.67	r80__500bp_up_and_100bp_down_tss.mc9nr.feather	w0.001	0.9	0.00380048	17605.4	1.27302	0.354458	3.59145	0.000328844	0.00227789	Upregulated	HW_vs_CW	obesity_upregulated
E2f8	Agfg2	TRUE	4	taipale_cyt_meth__E2F8_NTTTCCCGCCAAAN_eDBD	4.67	r80__500bp_up_and_100bp_down_tss.mc9nr.feather	w0.001	0.3	0.00325295	2483.47	0.607426	0.100763	6.02827	1.65724e-09	5.18953e-08	Upregulated	HW_vs_CW	obesity_upregulated
E2f8	Ak8	TRUE	4	taipale_cyt_meth__E2F8_NTTTCCCGCCAAAN_eDBD	4.67	r80__500bp_up_and_100bp_down_tss.mc9nr.feather	w0.001	0.3	0.00337992	110.557	1.91338	0.311692	6.1387	8.32007e-10	2.78673e-08	Upregulated	HW_vs_CW	obesity_upregulated
E2f8	Aldh3b1	TRUE	3	taipale_cyt_meth__E2F8_NTTTCCCGCCAAAN_eDBD	4.67	r80__500bp_up_and_100bp_down_tss.mc9nr.feather	w0.001	0.5	0.00129891	1119.61	1.33103	0.307876	4.32325	1.5375e-05	0.00016851	Upregulated	HW_vs_CW	obesity_upregulated
E2f8	Amer1	TRUE	2	taipale_cyt_meth__E2F8_NTTTCCCGCCAAAN_eDBD	4.67	r80__500bp_up_and_100bp_down_tss.mc9nr.feather	w0.001	0.3	0.00382569	1573.14	0.968638	0.184948	5.23735	1.62895e-07	3.17234e-06	Upregulated	HW_vs_CW	obesity_upregulated
E2f8	Ammecr1	TRUE	4	taipale_cyt_meth__E2F8_NTTTCCCGCCAAAN_eDBD	4.67	r80__500bp_up_and_100bp_down_tss.mc9nr.feather	w0.001	0.1	0.00103113	611.835	0.572174	0.188478	3.03576	0.00239934	0.0118424	Upregulated	HW_vs_CW	obesity_upregulated
E2f8	Angptl1	TRUE	4	taipale_cyt_meth__E2F8_NTTTCCCGCCAAAN_eDBD	4.67	r80__500bp_up_and_100bp_down_tss.mc9nr.feather	w0.001	0.4	0.00638789	400.928	1.39173	0.246617	5.6433	1.66822e-08	4.12415e-07	Upregulated	HW_vs_CW	obesity_upregulated
E2f8	Ankrd42	TRUE	4	taipale_cyt_meth__E2F8_NTTTCCCGCCAAAN_eDBD	4.67	r80__500bp_up_and_100bp_down_tss.mc9nr.feather	w0.001	0.4	0.00513565	360.522	0.818866	0.129157	6.34008	2.29651e-10	8.93601e-09	Upregulated	HW_vs_CW	obesity_upregulated
E2f8	Anxa2	TRUE	1	taipale_cyt_meth__E2F8_NTTTCCCGCCAAAN_eDBD	4.67	r80__500bp_up_and_100bp_down_tss.mc9nr.feather	w0.001	0.9	0.0205802	57157.3	1.92615	0.232617	8.28034	1.22825e-16	1.39456e-14	Upregulated	HW_vs_CW	obesity_upregulated
E2f8	Anxa6	TRUE	2	taipale_cyt_meth__E2F8_NTTTCCCGCCAAAN_eDBD	4.67	r80__500bp_up_and_100bp_down_tss.mc9nr.feather	w0.001	0.7	0.0144967	41574.7	0.967326	0.222233	4.35275	1.34442e-05	0.000149897	Upregulated	HW_vs_CW	obesity_upregulated
E2f8	Ap1s1	TRUE	3	taipale_cyt_meth__E2F8_NTTTCCCGCCAAAN_eDBD	4.67	r80__500bp_up_and_100bp_down_tss.mc9nr.feather	w0.001	0.3	0.00208505	3773.62	0.63383	0.14745	4.29861	1.71871e-05	0.000184678	Upregulated	HW_vs_CW	obesity_upregulated
E2f8	Apex2	TRUE	4	taipale_cyt_meth__E2F8_NTTTCCCGCCAAAN_eDBD	4.67	r80__500bp_up_and_100bp_down_tss.mc9nr.feather	w0.001	0.3	0.00952672	690.25	0.52536	0.16682	3.14927	0.00163679	0.00865236	Upregulated	HW_vs_CW	obesity_upregulated
E2f8	Apoo-ps	TRUE	4	taipale_cyt_meth__E2F8_NTTTCCCGCCAAAN_eDBD	4.67	r80__500bp_up_and_100bp_down_tss.mc9nr.feather	w0.001	0.6	0.0165658	118.29	1.55825	0.633859	2.45835	0.0139575	0.048959	Upregulated	HW_vs_CW	obesity_upregulated
E2f8	Arhgap11a	TRUE	4	taipale_cyt_meth__E2F8_NTTTCCCGCCAAAN_eDBD	4.67	r80__500bp_up_and_100bp_down_tss.mc9nr.feather	w0.001	0.8	0.00901736	798.367	1.02771	0.276666	3.71463	0.000203501	0.00153584	Upregulated	HW_vs_CW	obesity_upregulated
E2f8	Arhgap6	TRUE	3	taipale_cyt_meth__E2F8_NTTTCCCGCCAAAN_eDBD	4.67	r80__500bp_up_and_100bp_down_tss.mc9nr.feather	w0.001	0.3	0.00552473	764.633	0.518375	0.165041	3.14088	0.00168441	0.00884012	Upregulated	HW_vs_CW	obesity_upregulated
E2f8	Arhgdib	TRUE	1	taipale_cyt_meth__E2F8_NTTTCCCGCCAAAN_eDBD	4.67	r80__500bp_up_and_100bp_down_tss.mc9nr.feather	w0.001	0.6	0.00486752	2792.01	0.779942	0.268357	2.90636	0.00365663	0.0167296	Upregulated	HW_vs_CW	obesity_upregulated
E2f8	Armc6	TRUE	4	taipale_cyt_meth__E2F8_NTTTCCCGCCAAAN_eDBD	4.67	r80__500bp_up_and_100bp_down_tss.mc9nr.feather	w0.001	0.3	0.00195408	487.603	0.606663	0.171025	3.54723	0.00038931	0.00261235	Upregulated	HW_vs_CW	obesity_upregulated
E2f8	Armcx1	TRUE	1	taipale_cyt_meth__E2F8_NTTTCCCGCCAAAN_eDBD	4.67	r80__500bp_up_and_100bp_down_tss.mc9nr.feather	w0.001	0.4	0.00156378	1246.36	0.891892	0.184009	4.84699	1.25348e-06	1.88075e-05	Upregulated	HW_vs_CW	obesity_upregulated
E2f8	Armcx3	TRUE	3	taipale_cyt_meth__E2F8_NTTTCCCGCCAAAN_eDBD	4.67	r80__500bp_up_and_100bp_down_tss.mc9nr.feather	w0.001	0.1	0.00213543	1939.95	0.599472	0.129264	4.63756	3.52549e-06	4.66784e-05	Upregulated	HW_vs_CW	obesity_upregulated
E2f8	Asap1	TRUE	1	taipale_cyt_meth__E2F8_NTTTCCCGCCAAAN_eDBD	4.67	r80__500bp_up_and_100bp_down_tss.mc9nr.feather	w0.001	0.8	0.00858812	5717.12	0.521856	0.135336	3.85602	0.00011525	0.000947393	Upregulated	HW_vs_CW	obesity_upregulated
E2f8	Asf1b	TRUE	4	taipale_cyt_meth__E2F8_NTTTCCCGCCAAAN_eDBD	4.67	r80__500bp_up_and_100bp_down_tss.mc9nr.feather	w0.001	0.3	0.00376647	155.752	1.24151	0.353026	3.51675	0.000436865	0.00288147	Upregulated	HW_vs_CW	obesity_upregulated
E2f8	Aspm	TRUE	3	taipale_cyt_meth__E2F8_NTTTCCCGCCAAAN_eDBD	4.67	r80__500bp_up_and_100bp_down_tss.mc9nr.feather	w0.001	0.7	0.017337	193.927	1.6314	0.398415	4.09472	4.22679e-05	0.000401087	Upregulated	HW_vs_CW	obesity_upregulated
E2f8	Atad2	TRUE	4	taipale_cyt_meth__E2F8_NTTTCCCGCCAAAN_eDBD	4.67	r80__500bp_up_and_100bp_down_tss.mc9nr.feather	w0.001	0.4	0.00402084	928.942	0.611163	0.156978	3.89331	9.88874e-05	0.000829796	Upregulated	HW_vs_CW	obesity_upregulated
E2f8	Atad5	TRUE	4	taipale_cyt_meth__E2F8_NTTTCCCGCCAAAN_eDBD	4.67	r80__500bp_up_and_100bp_down_tss.mc9nr.feather	w0.001	0.1	0.00340531	256.929	0.721713	0.258022	2.7971	0.00515631	0.0220946	Upregulated	HW_vs_CW	obesity_upregulated
E2f8	Atf3	TRUE	4	taipale_cyt_meth__E2F8_NTTTCCCGCCAAAN_eDBD	4.67	r80__500bp_up_and_100bp_down_tss.mc9nr.feather	w0.001	0.3	0.00241199	2915.79	2.45989	0.210676	11.6762	1.68758e-31	1.3317e-28	Upregulated	HW_vs_CW	obesity_upregulated
E2f8	Atp10a	TRUE	4	taipale_cyt_meth__E2F8_NTTTCCCGCCAAAN_eDBD	4.67	r80__500bp_up_and_100bp_down_tss.mc9nr.feather	w0.001	0.3	0.002722	1830.28	1.2571	0.390004	3.2233	0.00126722	0.00702041	Upregulated	HW_vs_CW	obesity_upregulated
E2f8	Aunip	TRUE	4	taipale_cyt_meth__E2F8_NTTTCCCGCCAAAN_eDBD	4.67	r80__500bp_up_and_100bp_down_tss.mc9nr.feather	w0.001	0.1	0.00152539	18.5993	2.27001	0.830656	2.73279	0.00627996	0.025897	Upregulated	HW_vs_CW	obesity_upregulated
E2f8	Aurka	TRUE	4	taipale_cyt_meth__E2F8_NTTTCCCGCCAAAN_eDBD	4.67	r80__500bp_up_and_100bp_down_tss.mc9nr.feather	w0.001	0.4	0.00426725	178.475	0.63908	0.22402	2.85278	0.00433389	0.0192176	Upregulated	HW_vs_CW	obesity_upregulated
E2f8	B3gnt2	TRUE	3	taipale_cyt_meth__E2F8_NTTTCCCGCCAAAN_eDBD	4.67	r80__500bp_up_and_100bp_down_tss.mc9nr.feather	w0.001	0.5	0.00935597	35.4597	3.82816	0.861272	4.44478	8.79827e-06	0.000104122	Upregulated	HW_vs_CW	obesity_upregulated
E2f8	B4galt2	TRUE	2	taipale_cyt_meth__E2F8_NTTTCCCGCCAAAN_eDBD	4.67	r80__500bp_up_and_100bp_down_tss.mc9nr.feather	w0.001	0.3	0.0020203	543.238	0.802147	0.261779	3.06421	0.00218246	0.0109696	Upregulated	HW_vs_CW	obesity_upregulated
E2f8	B4galt6	TRUE	3	taipale_cyt_meth__E2F8_NTTTCCCGCCAAAN_eDBD	4.67	r80__500bp_up_and_100bp_down_tss.mc9nr.feather	w0.001	0.5	0.00325483	1437.03	1.10172	0.266882	4.12811	3.65754e-05	0.000354924	Upregulated	HW_vs_CW	obesity_upregulated
E2f8	Bak1	TRUE	1	taipale_cyt_meth__E2F8_NTTTCCCGCCAAAN_eDBD	4.67	r80__500bp_up_and_100bp_down_tss.mc9nr.feather	w0.001	0.9	0.00644307	1247.4	0.506683	0.163161	3.10541	0.00190016	0.00976972	Upregulated	HW_vs_CW	obesity_upregulated
E2f8	Bard1	TRUE	3	taipale_cyt_meth__E2F8_NTTTCCCGCCAAAN_eDBD	4.67	r80__500bp_up_and_100bp_down_tss.mc9nr.feather	w0.001	0.359092	0.00527219	61.8934	1.48042	0.368202	4.02067	5.80337e-05	0.000523259	Upregulated	HW_vs_CW	obesity_upregulated
E2f8	BC028528	TRUE	2	taipale_cyt_meth__E2F8_NTTTCCCGCCAAAN_eDBD	4.67	r80__500bp_up_and_100bp_down_tss.mc9nr.feather	w0.001	0.7	0.00701665	171.736	1.07699	0.19036	5.65768	1.53436e-08	3.83163e-07	Upregulated	HW_vs_CW	obesity_upregulated
E2f8	Bcar1	TRUE	3	taipale_cyt_meth__E2F8_NTTTCCCGCCAAAN_eDBD	4.67	r80__500bp_up_and_100bp_down_tss.mc9nr.feather	w0.001	0.1	0.00270006	2980.99	0.502143	0.152736	3.28766	0.00101023	0.00581476	Upregulated	HW_vs_CW	obesity_upregulated
E2f8	Bdnf	TRUE	4	taipale_cyt_meth__E2F8_NTTTCCCGCCAAAN_eDBD	4.67	r80__500bp_up_and_100bp_down_tss.mc9nr.feather	w0.001	0.9	0.0156757	136.106	2.00608	0.559342	3.58649	0.000335156	0.00231349	Upregulated	HW_vs_CW	obesity_upregulated
E2f8	Birc5	TRUE	1	taipale_cyt_meth__E2F8_NTTTCCCGCCAAAN_eDBD	4.67	r80__500bp_up_and_100bp_down_tss.mc9nr.feather	w0.001	0.9	0.0121344	162.551	2.48236	0.454183	5.46556	4.61455e-08	1.0345e-06	Upregulated	HW_vs_CW	obesity_upregulated
E2f8	Bmf	TRUE	4	taipale_cyt_meth__E2F8_NTTTCCCGCCAAAN_eDBD	4.67	r80__500bp_up_and_100bp_down_tss.mc9nr.feather	w0.001	0.1	0.00135975	1057.17	0.562653	0.220397	2.55291	0.0106828	0.0396372	Upregulated	HW_vs_CW	obesity_upregulated
E2f8	Boc	TRUE	2	taipale_cyt_meth__E2F8_NTTTCCCGCCAAAN_eDBD	4.67	r80__500bp_up_and_100bp_down_tss.mc9nr.feather	w0.001	0.3	0.00104938	2808.63	0.823677	0.281468	2.92636	0.00342954	0.0159008	Upregulated	HW_vs_CW	obesity_upregulated
E2f8	Brca1	TRUE	4	taipale_cyt_meth__E2F8_NTTTCCCGCCAAAN_eDBD	4.67	r80__500bp_up_and_100bp_down_tss.mc9nr.feather	w0.001	0.8	0.00991151	210.321	2.90219	0.440177	6.59325	4.30306e-11	1.92061e-09	Upregulated	HW_vs_CW	obesity_upregulated
E2f8	Btbd3	TRUE	1	taipale_cyt_meth__E2F8_NTTTCCCGCCAAAN_eDBD	4.67	r80__500bp_up_and_100bp_down_tss.mc9nr.feather	w0.001	0.2	0.00770993	2638.04	0.535906	0.119747	4.47532	7.62962e-06	9.22286e-05	Upregulated	HW_vs_CW	obesity_upregulated
E2f8	C1qtnf2	TRUE	3	taipale_cyt_meth__E2F8_NTTTCCCGCCAAAN_eDBD	4.67	r80__500bp_up_and_100bp_down_tss.mc9nr.feather	w0.001	0.1	0.00190409	356.653	0.567322	0.181454	3.12654	0.00176879	0.00921431	Upregulated	HW_vs_CW	obesity_upregulated
E2f8	C1qtnf6	TRUE	2	taipale_cyt_meth__E2F8_NTTTCCCGCCAAAN_eDBD	4.67	r80__500bp_up_and_100bp_down_tss.mc9nr.feather	w0.001	0.9	0.00836116	1308.23	0.977551	0.301977	3.23717	0.00120722	0.00674295	Upregulated	HW_vs_CW	obesity_upregulated
E2f8	C2cd5	TRUE	1	taipale_cyt_meth__E2F8_NTTTCCCGCCAAAN_eDBD	4.67	r80__500bp_up_and_100bp_down_tss.mc9nr.feather	w0.001	0.4	0.00246667	1297.07	0.508483	0.145151	3.50313	0.00045982	0.00301173	Upregulated	HW_vs_CW	obesity_upregulated
E2f8	Cachd1	TRUE	2	taipale_cyt_meth__E2F8_NTTTCCCGCCAAAN_eDBD	4.67	r80__500bp_up_and_100bp_down_tss.mc9nr.feather	w0.001	0.7	0.00684782	5115.68	1.18253	0.256578	4.60885	4.04903e-06	5.29001e-05	Upregulated	HW_vs_CW	obesity_upregulated
E2f8	Calm1	TRUE	3	taipale_cyt_meth__E2F8_NTTTCCCGCCAAAN_eDBD	4.67	r80__500bp_up_and_100bp_down_tss.mc9nr.feather	w0.001	0.1	0.00784286	31601.6	0.676199	0.0907191	7.45377	9.07117e-14	6.628e-12	Upregulated	HW_vs_CW	obesity_upregulated
E2f8	Calm2	TRUE	2	taipale_cyt_meth__E2F8_NTTTCCCGCCAAAN_eDBD	4.67	r80__500bp_up_and_100bp_down_tss.mc9nr.feather	w0.001	0.1	0.00279886	15782.3	0.654261	0.139243	4.69868	2.61849e-06	3.61622e-05	Upregulated	HW_vs_CW	obesity_upregulated
E2f8	Camk1	TRUE	2	taipale_cyt_meth__E2F8_NTTTCCCGCCAAAN_eDBD	4.67	r80__500bp_up_and_100bp_down_tss.mc9nr.feather	w0.001	0.8	0.0103606	5538.05	0.625954	0.175491	3.56687	0.000361267	0.00246271	Upregulated	HW_vs_CW	obesity_upregulated
E2f8	Camk1d	TRUE	4	taipale_cyt_meth__E2F8_NTTTCCCGCCAAAN_eDBD	4.67	r80__500bp_up_and_100bp_down_tss.mc9nr.feather	w0.001	0.3	0.00153443	1353.73	0.873997	0.257001	3.40075	0.00067202	0.0041301	Upregulated	HW_vs_CW	obesity_upregulated
E2f8	Camk2n2	TRUE	4	taipale_cyt_meth__E2F8_NTTTCCCGCCAAAN_eDBD	4.67	r80__500bp_up_and_100bp_down_tss.mc9nr.feather	w0.001	0.1	0.00380025	276.998	1.40106	0.536141	2.61324	0.00896888	0.0344774	Upregulated	HW_vs_CW	obesity_upregulated
E2f8	Cav1	TRUE	4	taipale_cyt_meth__E2F8_NTTTCCCGCCAAAN_eDBD	4.67	r80__500bp_up_and_100bp_down_tss.mc9nr.feather	w0.001	0.6	0.0229779	122491	1.23994	0.216818	5.7188	1.07281e-08	2.77383e-07	Upregulated	HW_vs_CW	obesity_upregulated
E2f8	Ccdc102a	TRUE	4	taipale_cyt_meth__E2F8_NTTTCCCGCCAAAN_eDBD	4.67	r80__500bp_up_and_100bp_down_tss.mc9nr.feather	w0.001	0.9	0.00711117	918.424	0.626528	0.198118	3.16239	0.00156479	0.00833877	Upregulated	HW_vs_CW	obesity_upregulated
E2f8	Ccdc28b	TRUE	1	taipale_cyt_meth__E2F8_NTTTCCCGCCAAAN_eDBD	4.67	r80__500bp_up_and_100bp_down_tss.mc9nr.feather	w0.001	0.1	0.00172589	929.972	0.568861	0.101142	5.62437	1.86185e-08	4.56281e-07	Upregulated	HW_vs_CW	obesity_upregulated
E2f8	Ccdc88a	TRUE	3	taipale_cyt_meth__E2F8_NTTTCCCGCCAAAN_eDBD	4.67	r80__500bp_up_and_100bp_down_tss.mc9nr.feather	w0.001	0.5	0.00256806	1716.82	0.7164	0.149245	4.80016	1.5854e-06	2.29976e-05	Upregulated	HW_vs_CW	obesity_upregulated
E2f8	Cckbr	TRUE	2	taipale_cyt_meth__E2F8_NTTTCCCGCCAAAN_eDBD	4.67	r80__500bp_up_and_100bp_down_tss.mc9nr.feather	w0.001	0.4	0.0044553	13.2292	2.75977	0.789549	3.49537	0.000473399	0.0030853	Upregulated	HW_vs_CW	obesity_upregulated
E2f8	Ccl22	TRUE	4	taipale_cyt_meth__E2F8_NTTTCCCGCCAAAN_eDBD	4.67	r80__500bp_up_and_100bp_down_tss.mc9nr.feather	w0.001	0.5	0.00181517	152.622	1.4986	0.538986	2.78041	0.00542903	0.0230133	Upregulated	HW_vs_CW	obesity_upregulated
E2f8	Ccna2	TRUE	3	taipale_cyt_meth__E2F8_NTTTCCCGCCAAAN_eDBD	4.67	r80__500bp_up_and_100bp_down_tss.mc9nr.feather	w0.001	0.9	0.02648	258.89	1.77272	0.359855	4.92619	8.38465e-07	1.31384e-05	Upregulated	HW_vs_CW	obesity_upregulated
E2f8	Ccnb1	TRUE	3	taipale_cyt_meth__E2F8_NTTTCCCGCCAAAN_eDBD	4.67	r80__500bp_up_and_100bp_down_tss.mc9nr.feather	w0.001	0.9	0.0287428	177.7	2.17427	0.454717	4.78159	1.73916e-06	2.50622e-05	Upregulated	HW_vs_CW	obesity_upregulated
E2f8	Ccne2	TRUE	4	taipale_cyt_meth__E2F8_NTTTCCCGCCAAAN_eDBD	4.67	r80__500bp_up_and_100bp_down_tss.mc9nr.feather	w0.001	0.3	0.00208181	250.26	0.692878	0.240451	2.88158	0.00395686	0.0178425	Upregulated	HW_vs_CW	obesity_upregulated
E2f8	Ccnf	TRUE	2	taipale_cyt_meth__E2F8_NTTTCCCGCCAAAN_eDBD	4.67	r80__500bp_up_and_100bp_down_tss.mc9nr.feather	w0.001	0.8	0.00622917	184.03	0.909607	0.269421	3.37615	0.000735074	0.00445284	Upregulated	HW_vs_CW	obesity_upregulated
E2f8	Ccser2	TRUE	1	taipale_cyt_meth__E2F8_NTTTCCCGCCAAAN_eDBD	4.67	r80__500bp_up_and_100bp_down_tss.mc9nr.feather	w0.001	0.5	0.00531223	10146	0.701635	0.131907	5.31918	1.04235e-07	2.13758e-06	Upregulated	HW_vs_CW	obesity_upregulated
E2f8	Cd34	TRUE	2	taipale_cyt_meth__E2F8_NTTTCCCGCCAAAN_eDBD	4.67	r80__500bp_up_and_100bp_down_tss.mc9nr.feather	w0.001	0.6	0.00415486	9889.45	0.568184	0.205691	2.76232	0.00573927	0.0240698	Upregulated	HW_vs_CW	obesity_upregulated
E2f8	Cd44	TRUE	4	taipale_cyt_meth__E2F8_NTTTCCCGCCAAAN_eDBD	4.67	r80__500bp_up_and_100bp_down_tss.mc9nr.feather	w0.001	0.6	0.00222133	3244.8	1.36091	0.274074	4.9655	6.85259e-07	1.09909e-05	Upregulated	HW_vs_CW	obesity_upregulated
E2f8	Cdc45	TRUE	4	taipale_cyt_meth__E2F8_NTTTCCCGCCAAAN_eDBD	4.67	r80__500bp_up_and_100bp_down_tss.mc9nr.feather	w0.001	0.4	0.00866875	398.427	0.75453	0.134934	5.59183	2.24687e-08	5.41886e-07	Upregulated	HW_vs_CW	obesity_upregulated
E2f8	Cdc7	TRUE	4	taipale_cyt_meth__E2F8_NTTTCCCGCCAAAN_eDBD	4.67	r80__500bp_up_and_100bp_down_tss.mc9nr.feather	w0.001	0.5	0.00234136	249.923	0.98069	0.226589	4.32806	1.50429e-05	0.000165329	Upregulated	HW_vs_CW	obesity_upregulated
E2f8	Cdca3	TRUE	4	taipale_cyt_meth__E2F8_NTTTCCCGCCAAAN_eDBD	4.67	r80__500bp_up_and_100bp_down_tss.mc9nr.feather	w0.001	0.9	0.0123892	270.967	1.35935	0.280871	4.83977	1.2999e-06	1.93982e-05	Upregulated	HW_vs_CW	obesity_upregulated
E2f8	Cdca5	TRUE	4	taipale_cyt_meth__E2F8_NTTTCCCGCCAAAN_eDBD	4.67	r80__500bp_up_and_100bp_down_tss.mc9nr.feather	w0.001	0.5	0.00722299	54.1365	2.05043	0.45736	4.48318	7.35388e-06	8.92235e-05	Upregulated	HW_vs_CW	obesity_upregulated
E2f8	Cdca7l	TRUE	4	taipale_cyt_meth__E2F8_NTTTCCCGCCAAAN_eDBD	4.67	r80__500bp_up_and_100bp_down_tss.mc9nr.feather	w0.001	0.9	0.0214871	386.406	1.73566	0.294563	5.89231	3.80825e-09	1.10484e-07	Upregulated	HW_vs_CW	obesity_upregulated
E2f8	Cdk14	TRUE	2	taipale_cyt_meth__E2F8_NTTTCCCGCCAAAN_eDBD	4.67	r80__500bp_up_and_100bp_down_tss.mc9nr.feather	w0.001	0.7	0.0142881	3607.33	0.710943	0.195165	3.64278	0.000269714	0.00193277	Upregulated	HW_vs_CW	obesity_upregulated
E2f8	Cdk6	TRUE	3	taipale_cyt_meth__E2F8_NTTTCCCGCCAAAN_eDBD	4.67	r80__500bp_up_and_100bp_down_tss.mc9nr.feather	w0.001	0.3	0.0059778	1224.96	0.546773	0.205221	2.66431	0.00771462	0.0305059	Upregulated	HW_vs_CW	obesity_upregulated
E2f8	Cdkn3	TRUE	3	taipale_cyt_meth__E2F8_NTTTCCCGCCAAAN_eDBD	4.67	r80__500bp_up_and_100bp_down_tss.mc9nr.feather	w0.001	0.9	0.0210005	49.7619	1.36051	0.346654	3.92469	8.68423e-05	0.000741656	Upregulated	HW_vs_CW	obesity_upregulated
E2f8	Cdr2	TRUE	1	taipale_cyt_meth__E2F8_NTTTCCCGCCAAAN_eDBD	4.67	r80__500bp_up_and_100bp_down_tss.mc9nr.feather	w0.001	0.9	0.0198935	4093.82	1.44575	0.245391	5.89162	3.82436e-09	1.10788e-07	Upregulated	HW_vs_CW	obesity_upregulated
E2f8	Cdt1	TRUE	4	taipale_cyt_meth__E2F8_NTTTCCCGCCAAAN_eDBD	4.67	r80__500bp_up_and_100bp_down_tss.mc9nr.feather	w0.001	0.5	0.00263478	326.286	1.08588	0.283079	3.83595	0.000125079	0.00101379	Upregulated	HW_vs_CW	obesity_upregulated
E2f8	Ceacam16	TRUE	3	taipale_cyt_meth__E2F8_NTTTCCCGCCAAAN_eDBD	4.67	r80__500bp_up_and_100bp_down_tss.mc9nr.feather	w0.001	0.5	0.00158048	16.2977	2.86118	0.809163	3.53598	0.000406269	0.0027059	Upregulated	HW_vs_CW	obesity_upregulated
E2f8	Cenph	TRUE	4	taipale_cyt_meth__E2F8_NTTTCCCGCCAAAN_eDBD	4.67	r80__500bp_up_and_100bp_down_tss.mc9nr.feather	w0.001	0.6	0.00916498	29.1249	2.89338	0.597771	4.84028	1.29656e-06	1.9363e-05	Upregulated	HW_vs_CW	obesity_upregulated
E2f8	Cenpp	TRUE	3	taipale_cyt_meth__E2F8_NTTTCCCGCCAAAN_eDBD	4.67	r80__500bp_up_and_100bp_down_tss.mc9nr.feather	w0.001	0.1	0.00307397	70.3691	1.35612	0.276612	4.9026	9.45743e-07	1.46013e-05	Upregulated	HW_vs_CW	obesity_upregulated
E2f8	Cep162	TRUE	3	taipale_cyt_meth__E2F8_NTTTCCCGCCAAAN_eDBD	4.67	r80__500bp_up_and_100bp_down_tss.mc9nr.feather	w0.001	0.3	0.00188864	844.656	0.764594	0.178176	4.29122	1.77694e-05	0.000190209	Upregulated	HW_vs_CW	obesity_upregulated
E2f8	Cep164	TRUE	4	taipale_cyt_meth__E2F8_NTTTCCCGCCAAAN_eDBD	4.67	r80__500bp_up_and_100bp_down_tss.mc9nr.feather	w0.001	0.1	0.00499708	1423.14	0.83331	0.167072	4.98774	6.10899e-07	1.00432e-05	Upregulated	HW_vs_CW	obesity_upregulated
E2f8	Cep250	TRUE	4	taipale_cyt_meth__E2F8_NTTTCCCGCCAAAN_eDBD	4.67	r80__500bp_up_and_100bp_down_tss.mc9nr.feather	w0.001	0.3	0.0068568	2439.13	0.584987	0.146024	4.00611	6.17269e-05	0.000551767	Upregulated	HW_vs_CW	obesity_upregulated
E2f8	Cercam	TRUE	1	taipale_cyt_meth__E2F8_NTTTCCCGCCAAAN_eDBD	4.67	r80__500bp_up_and_100bp_down_tss.mc9nr.feather	w0.001	0.5	0.00660082	1069.97	1.21909	0.238197	5.118	3.08787e-07	5.53796e-06	Upregulated	HW_vs_CW	obesity_upregulated
E2f8	Chaf1a	TRUE	4	taipale_cyt_meth__E2F8_NTTTCCCGCCAAAN_eDBD	4.67	r80__500bp_up_and_100bp_down_tss.mc9nr.feather	w0.001	0.8	0.00403968	342.105	1.32498	0.27538	4.81147	1.49821e-06	2.1959e-05	Upregulated	HW_vs_CW	obesity_upregulated
E2f8	Chek1	TRUE	4	taipale_cyt_meth__E2F8_NTTTCCCGCCAAAN_eDBD	4.67	r80__500bp_up_and_100bp_down_tss.mc9nr.feather	w0.001	0.3	0.00162743	72.0013	1.41857	0.274123	5.17495	2.27972e-07	4.20714e-06	Upregulated	HW_vs_CW	obesity_upregulated
E2f8	Chek2	TRUE	4	taipale_cyt_meth__E2F8_NTTTCCCGCCAAAN_eDBD	4.67	r80__500bp_up_and_100bp_down_tss.mc9nr.feather	w0.001	0.4	0.00764121	490.65	1.39687	0.200186	6.97788	2.99671e-12	1.62862e-10	Upregulated	HW_vs_CW	obesity_upregulated
E2f8	Ckap2l	TRUE	4	taipale_cyt_meth__E2F8_NTTTCCCGCCAAAN_eDBD	4.67	r80__500bp_up_and_100bp_down_tss.mc9nr.feather	w0.001	0.7	0.0128716	145.821	1.84973	0.279262	6.62365	3.50447e-11	1.58934e-09	Upregulated	HW_vs_CW	obesity_upregulated
E2f8	Cks1b	TRUE	4	taipale_cyt_meth__E2F8_NTTTCCCGCCAAAN_eDBD	4.67	r80__500bp_up_and_100bp_down_tss.mc9nr.feather	w0.001	0.1	0.00309996	786.979	0.73217	0.152685	4.79529	1.62437e-06	2.35283e-05	Upregulated	HW_vs_CW	obesity_upregulated
E2f8	Clspn	TRUE	4	taipale_cyt_meth__E2F8_NTTTCCCGCCAAAN_eDBD	4.67	r80__500bp_up_and_100bp_down_tss.mc9nr.feather	w0.001	0.5	0.00262866	104.085	1.54697	0.440423	3.51246	0.00044398	0.00291977	Upregulated	HW_vs_CW	obesity_upregulated
E2f8	Cmc2	TRUE	1	taipale_cyt_meth__E2F8_NTTTCCCGCCAAAN_eDBD	4.67	r80__500bp_up_and_100bp_down_tss.mc9nr.feather	w0.001	0.1	0.00319367	816.452	0.620653	0.178374	3.4795	0.000502352	0.00322604	Upregulated	HW_vs_CW	obesity_upregulated
E2f8	Cntln	TRUE	4	taipale_cyt_meth__E2F8_NTTTCCCGCCAAAN_eDBD	4.67	r80__500bp_up_and_100bp_down_tss.mc9nr.feather	w0.001	0.1	0.00327204	1519.62	0.653437	0.188018	3.47539	0.000510116	0.0032727	Upregulated	HW_vs_CW	obesity_upregulated
E2f8	Cntrl	TRUE	4	taipale_cyt_meth__E2F8_NTTTCCCGCCAAAN_eDBD	4.67	r80__500bp_up_and_100bp_down_tss.mc9nr.feather	w0.001	0.3	0.00644979	2086.66	0.551397	0.146525	3.76317	0.000167775	0.00130054	Upregulated	HW_vs_CW	obesity_upregulated
E2f8	Col5a1	TRUE	3	taipale_cyt_meth__E2F8_NTTTCCCGCCAAAN_eDBD	4.67	r80__500bp_up_and_100bp_down_tss.mc9nr.feather	w0.001	0.7	0.0171285	13984.2	1.09129	0.266994	4.08733	4.36365e-05	0.000410912	Upregulated	HW_vs_CW	obesity_upregulated
E2f8	Creb3l2	TRUE	4	taipale_cyt_meth__E2F8_NTTTCCCGCCAAAN_eDBD	4.67	r80__500bp_up_and_100bp_down_tss.mc9nr.feather	w0.001	0.1	0.00442907	6430	0.694527	0.215936	3.21635	0.00129832	0.00716653	Upregulated	HW_vs_CW	obesity_upregulated
E2f8	Csk	TRUE	1	taipale_cyt_meth__E2F8_NTTTCCCGCCAAAN_eDBD	4.67	r80__500bp_up_and_100bp_down_tss.mc9nr.feather	w0.001	0.5	0.00668541	4404.66	0.519339	0.128957	4.02724	5.64366e-05	0.000510959	Upregulated	HW_vs_CW	obesity_upregulated
E2f8	Cux2	TRUE	4	taipale_cyt_meth__E2F8_NTTTCCCGCCAAAN_eDBD	4.67	r80__500bp_up_and_100bp_down_tss.mc9nr.feather	w0.001	0.1	0.00466492	308.138	2.00134	0.71864	2.7849	0.0053544	0.0227507	Upregulated	HW_vs_CW	obesity_upregulated
E2f8	Cxcl1	TRUE	4	taipale_cyt_meth__E2F8_NTTTCCCGCCAAAN_eDBD	4.67	r80__500bp_up_and_100bp_down_tss.mc9nr.feather	w0.001	0.4	0.00406317	141.777	2.05632	0.469872	4.37635	1.20685e-05	0.00013574	Upregulated	HW_vs_CW	obesity_upregulated
E2f8	D930048N14Rik	TRUE	4	taipale_cyt_meth__E2F8_NTTTCCCGCCAAAN_eDBD	4.67	r80__500bp_up_and_100bp_down_tss.mc9nr.feather	w0.001	0.3	0.0029075	296.473	0.65275	0.186675	3.49672	0.000471011	0.0030738	Upregulated	HW_vs_CW	obesity_upregulated
E2f8	Daam1	TRUE	3	taipale_cyt_meth__E2F8_NTTTCCCGCCAAAN_eDBD	4.67	r80__500bp_up_and_100bp_down_tss.mc9nr.feather	w0.001	0.3	0.00324333	3486.85	0.546531	0.105425	5.18408	2.17089e-07	4.04412e-06	Upregulated	HW_vs_CW	obesity_upregulated
E2f8	Dcbld2	TRUE	2	taipale_cyt_meth__E2F8_NTTTCCCGCCAAAN_eDBD	4.67	r80__500bp_up_and_100bp_down_tss.mc9nr.feather	w0.001	0.9	0.0194708	3248.06	0.888452	0.183293	4.84717	1.25234e-06	1.88075e-05	Upregulated	HW_vs_CW	obesity_upregulated
E2f8	Dcp2	TRUE	4	taipale_cyt_meth__E2F8_NTTTCCCGCCAAAN_eDBD	4.67	r80__500bp_up_and_100bp_down_tss.mc9nr.feather	w0.001	0.1	0.00187319	2543.62	0.568336	0.127837	4.44578	8.75719e-06	0.000103761	Upregulated	HW_vs_CW	obesity_upregulated
E2f8	Ddias	TRUE	2	taipale_cyt_meth__E2F8_NTTTCCCGCCAAAN_eDBD	4.67	r80__500bp_up_and_100bp_down_tss.mc9nr.feather	w0.001	0.1	0.00539621	55.1738	1.59376	0.365978	4.35479	1.33194e-05	0.000148622	Upregulated	HW_vs_CW	obesity_upregulated
E2f8	Ddr1	TRUE	2	taipale_cyt_meth__E2F8_NTTTCCCGCCAAAN_eDBD	4.67	r80__500bp_up_and_100bp_down_tss.mc9nr.feather	w0.001	0.1	0.0048557	3377.51	1.04096	0.199474	5.21851	1.80364e-07	3.44788e-06	Upregulated	HW_vs_CW	obesity_upregulated
E2f8	Deptor	TRUE	2	taipale_cyt_meth__E2F8_NTTTCCCGCCAAAN_eDBD	4.67	r80__500bp_up_and_100bp_down_tss.mc9nr.feather	w0.001	0.8	0.00957411	14284.1	1.10761	0.231128	4.79221	1.64955e-06	2.38405e-05	Upregulated	HW_vs_CW	obesity_upregulated
E2f8	Diaph3	TRUE	2	taipale_cyt_meth__E2F8_NTTTCCCGCCAAAN_eDBD	4.67	r80__500bp_up_and_100bp_down_tss.mc9nr.feather	w0.001	0.9	0.0148429	132.361	1.6957	0.401586	4.2225	2.41612e-05	0.000247919	Upregulated	HW_vs_CW	obesity_upregulated
E2f8	Dll4	TRUE	1	taipale_cyt_meth__E2F8_NTTTCCCGCCAAAN_eDBD	4.67	r80__500bp_up_and_100bp_down_tss.mc9nr.feather	w0.001	0.1	0.00440349	1440.02	1.24188	0.0975079	12.7362	3.72046e-37	4.07762e-34	Upregulated	HW_vs_CW	obesity_upregulated
E2f8	Dna2	TRUE	3	taipale_cyt_meth__E2F8_NTTTCCCGCCAAAN_eDBD	4.67	r80__500bp_up_and_100bp_down_tss.mc9nr.feather	w0.001	0.5	0.019931	336.665	1.30671	0.397929	3.28376	0.00102432	0.00587433	Upregulated	HW_vs_CW	obesity_upregulated
E2f8	Dnah2	TRUE	2	taipale_cyt_meth__E2F8_NTTTCCCGCCAAAN_eDBD	4.67	r80__500bp_up_and_100bp_down_tss.mc9nr.feather	w0.001	0.205196	0.0014441	65.927	0.689377	0.275069	2.50619	0.0122039	0.0440225	Upregulated	HW_vs_CW	obesity_upregulated
E2f8	Dnmt1	TRUE	4	taipale_cyt_meth__E2F8_NTTTCCCGCCAAAN_eDBD	4.67	r80__500bp_up_and_100bp_down_tss.mc9nr.feather	w0.001	0.3	0.0019129	2591.99	0.598304	0.196053	3.05174	0.00227518	0.0113374	Upregulated	HW_vs_CW	obesity_upregulated
E2f8	Dock10	TRUE	2	taipale_cyt_meth__E2F8_NTTTCCCGCCAAAN_eDBD	4.67	r80__500bp_up_and_100bp_down_tss.mc9nr.feather	w0.001	0.3	0.00569527	3252.78	1.22306	0.216768	5.64226	1.67833e-08	4.14394e-07	Upregulated	HW_vs_CW	obesity_upregulated
E2f8	Dpp3	TRUE	2	taipale_cyt_meth__E2F8_NTTTCCCGCCAAAN_eDBD	4.67	r80__500bp_up_and_100bp_down_tss.mc9nr.feather	w0.001	0.1	0.00214572	2955.71	0.552498	0.164017	3.36855	0.000755644	0.00455603	Upregulated	HW_vs_CW	obesity_upregulated
E2f8	Dscc1	TRUE	4	taipale_cyt_meth__E2F8_NTTTCCCGCCAAAN_eDBD	4.67	r80__500bp_up_and_100bp_down_tss.mc9nr.feather	w0.001	0.6	0.00732663	35.7851	1.18914	0.466931	2.54672	0.010874	0.0401278	Upregulated	HW_vs_CW	obesity_upregulated
E2f8	Dtl	TRUE	4	taipale_cyt_meth__E2F8_NTTTCCCGCCAAAN_eDBD	4.67	r80__500bp_up_and_100bp_down_tss.mc9nr.feather	w0.001	0.8	0.00186969	159.623	2.28099	0.302233	7.54714	4.44926e-14	3.41537e-12	Upregulated	HW_vs_CW	obesity_upregulated
E2f8	Dtx3l	TRUE	4	taipale_cyt_meth__E2F8_NTTTCCCGCCAAAN_eDBD	4.67	r80__500bp_up_and_100bp_down_tss.mc9nr.feather	w0.001	0.3	0.00538966	3507.26	0.542	0.166427	3.25669	0.00112718	0.00637528	Upregulated	HW_vs_CW	obesity_upregulated
E2f8	Dusp10	TRUE	2	taipale_cyt_meth__E2F8_NTTTCCCGCCAAAN_eDBD	4.67	r80__500bp_up_and_100bp_down_tss.mc9nr.feather	w0.001	0.7	0.0258296	2319.65	1.20637	0.319647	3.77407	0.000160608	0.00125385	Upregulated	HW_vs_CW	obesity_upregulated
E2f8	Dusp5	TRUE	3	taipale_cyt_meth__E2F8_NTTTCCCGCCAAAN_eDBD	4.67	r80__500bp_up_and_100bp_down_tss.mc9nr.feather	w0.001	0.1	0.00380342	386.022	1.5546	0.544352	2.85586	0.00429198	0.0190489	Upregulated	HW_vs_CW	obesity_upregulated
E2f8	E2f1	TRUE	4	taipale_cyt_meth__E2F8_NTTTCCCGCCAAAN_eDBD	4.67	r80__500bp_up_and_100bp_down_tss.mc9nr.feather	w0.001	0.5	0.0067451	937.562	1.38249	0.319895	4.32169	1.54838e-05	0.000169608	Upregulated	HW_vs_CW	obesity_upregulated
E2f8	E2f2	TRUE	4	taipale_cyt_meth__E2F8_NTTTCCCGCCAAAN_eDBD	4.67	r80__500bp_up_and_100bp_down_tss.mc9nr.feather	w0.001	0.7	0.00350496	181.326	1.4183	0.341802	4.1495	3.33208e-05	0.000328348	Upregulated	HW_vs_CW	obesity_upregulated
E2f8	E2f6	TRUE	2	taipale_cyt_meth__E2F8_NTTTCCCGCCAAAN_eDBD	4.67	r80__500bp_up_and_100bp_down_tss.mc9nr.feather	w0.001	0.2	0.00136554	2323.53	0.519289	0.176602	2.94045	0.00327738	0.0153432	Upregulated	HW_vs_CW	obesity_upregulated
E2f8	E2f8	TRUE	9	taipale_cyt_meth__E2F8_NTTTCCCGCCAAAN_eDBD	4.67	r80__500bp_up_and_100bp_down_tss.mc9nr.feather	w0.001	1	NA	73.848	2.07947	0.501464	4.1468	3.37149e-05	0.000331278	Upregulated	HW_vs_CW	obesity_upregulated
E2f8	Ect2	TRUE	3	taipale_cyt_meth__E2F8_NTTTCCCGCCAAAN_eDBD	4.67	r80__500bp_up_and_100bp_down_tss.mc9nr.feather	w0.001	0.5	0.00920992	176.066	1.30804	0.303509	4.30972	1.63459e-05	0.000177182	Upregulated	HW_vs_CW	obesity_upregulated
E2f8	Edem1	TRUE	4	taipale_cyt_meth__E2F8_NTTTCCCGCCAAAN_eDBD	4.67	r80__500bp_up_and_100bp_down_tss.mc9nr.feather	w0.001	0.9	0.0128854	11856.9	0.774151	0.187736	4.12361	3.72975e-05	0.000360159	Upregulated	HW_vs_CW	obesity_upregulated
E2f8	Efhd2	TRUE	2	taipale_cyt_meth__E2F8_NTTTCCCGCCAAAN_eDBD	4.67	r80__500bp_up_and_100bp_down_tss.mc9nr.feather	w0.001	0.6	0.00746429	5207.66	0.836034	0.276849	3.01982	0.00252924	0.0123691	Upregulated	HW_vs_CW	obesity_upregulated
E2f8	Egr2	TRUE	3	taipale_cyt_meth__E2F8_NTTTCCCGCCAAAN_eDBD	4.67	r80__500bp_up_and_100bp_down_tss.mc9nr.feather	w0.001	0.3	0.00110908	559.946	2.186	0.407357	5.36629	8.03732e-08	1.71291e-06	Upregulated	HW_vs_CW	obesity_upregulated
E2f8	Eif2ak2	TRUE	2	taipale_cyt_meth__E2F8_NTTTCCCGCCAAAN_eDBD	4.67	r80__500bp_up_and_100bp_down_tss.mc9nr.feather	w0.001	0.3	0.00361156	2287.09	0.789474	0.143162	5.51457	3.49639e-08	8.10538e-07	Upregulated	HW_vs_CW	obesity_upregulated
E2f8	Elmo1	TRUE	4	taipale_cyt_meth__E2F8_NTTTCCCGCCAAAN_eDBD	4.67	r80__500bp_up_and_100bp_down_tss.mc9nr.feather	w0.001	0.3	0.00107032	1983.04	0.702025	0.103273	6.79774	1.06275e-11	5.33482e-10	Upregulated	HW_vs_CW	obesity_upregulated
E2f8	Eme1	TRUE	2	taipale_cyt_meth__E2F8_NTTTCCCGCCAAAN_eDBD	4.67	r80__500bp_up_and_100bp_down_tss.mc9nr.feather	w0.001	0.1	0.00996216	32.9025	1.5037	0.411422	3.65489	0.000257289	0.00185791	Upregulated	HW_vs_CW	obesity_upregulated
E2f8	Emp3	TRUE	4	taipale_cyt_meth__E2F8_NTTTCCCGCCAAAN_eDBD	4.67	r80__500bp_up_and_100bp_down_tss.mc9nr.feather	w0.001	0.3	0.00136818	3174.87	1.21619	0.278292	4.37021	1.24129e-05	0.000139059	Upregulated	HW_vs_CW	obesity_upregulated
E2f8	Epb41l2	TRUE	3	taipale_cyt_meth__E2F8_NTTTCCCGCCAAAN_eDBD	4.67	r80__500bp_up_and_100bp_down_tss.mc9nr.feather	w0.001	0.9	0.0175822	31156.5	1.38411	0.195319	7.0864	1.37649e-12	7.96343e-11	Upregulated	HW_vs_CW	obesity_upregulated
E2f8	Ephb1	TRUE	2	taipale_cyt_meth__E2F8_NTTTCCCGCCAAAN_eDBD	4.67	r80__500bp_up_and_100bp_down_tss.mc9nr.feather	w0.001	0.7	0.0102528	210.709	1.50339	0.342366	4.39118	1.12737e-05	0.000128337	Upregulated	HW_vs_CW	obesity_upregulated
E2f8	Erg	TRUE	3	taipale_cyt_meth__E2F8_NTTTCCCGCCAAAN_eDBD	4.67	r80__500bp_up_and_100bp_down_tss.mc9nr.feather	w0.001	0.5	0.0063709	3107.15	0.709088	0.138683	5.11303	3.17036e-07	5.67012e-06	Upregulated	HW_vs_CW	obesity_upregulated
E2f8	Espl1	TRUE	3	taipale_cyt_meth__E2F8_NTTTCCCGCCAAAN_eDBD	4.67	r80__500bp_up_and_100bp_down_tss.mc9nr.feather	w0.001	0.3	0.00335124	249.114	0.858292	0.314311	2.73071	0.0063198	0.0260286	Upregulated	HW_vs_CW	obesity_upregulated
E2f8	Esyt1	TRUE	5	taipale_cyt_meth__E2F8_NTTTCCCGCCAAAN_eDBD	4.67	r80__500bp_up_and_100bp_down_tss.mc9nr.feather	w0.001	1	0.0481504	17549.4	0.551908	0.198358	2.78238	0.00539624	0.0229038	Upregulated	HW_vs_CW	obesity_upregulated
E2f8	Eva1b	TRUE	4	taipale_cyt_meth__E2F8_NTTTCCCGCCAAAN_eDBD	4.67	r80__500bp_up_and_100bp_down_tss.mc9nr.feather	w0.001	0.3	0.00449186	962.463	0.702912	0.253565	2.77212	0.00556925	0.0235016	Upregulated	HW_vs_CW	obesity_upregulated
E2f8	Evi2a	TRUE	2	taipale_cyt_meth__E2F8_NTTTCCCGCCAAAN_eDBD	4.67	r80__500bp_up_and_100bp_down_tss.mc9nr.feather	w0.001	0.3	0.00291532	893.17	1.49302	0.408646	3.65359	0.000258598	0.00186541	Upregulated	HW_vs_CW	obesity_upregulated
E2f8	Exo1	TRUE	3	taipale_cyt_meth__E2F8_NTTTCCCGCCAAAN_eDBD	4.67	r80__500bp_up_and_100bp_down_tss.mc9nr.feather	w0.001	0.8	0.00707413	38.2746	3.28401	0.731062	4.49211	7.05196e-06	8.61431e-05	Upregulated	HW_vs_CW	obesity_upregulated
E2f8	Exoc4	TRUE	3	taipale_cyt_meth__E2F8_NTTTCCCGCCAAAN_eDBD	4.67	r80__500bp_up_and_100bp_down_tss.mc9nr.feather	w0.001	0.1	0.00656631	4210.66	0.771572	0.11088	6.9586	3.43668e-12	1.8575e-10	Upregulated	HW_vs_CW	obesity_upregulated
E2f8	Fam234b	TRUE	4	taipale_cyt_meth__E2F8_NTTTCCCGCCAAAN_eDBD	4.67	r80__500bp_up_and_100bp_down_tss.mc9nr.feather	w0.001	0.1	0.00654978	883.924	1.35091	0.443697	3.04467	0.00232937	0.0115607	Upregulated	HW_vs_CW	obesity_upregulated
E2f8	Fam53b	TRUE	1	taipale_cyt_meth__E2F8_NTTTCCCGCCAAAN_eDBD	4.67	r80__500bp_up_and_100bp_down_tss.mc9nr.feather	w0.001	0.2	0.00784847	7031.45	1.29401	0.202363	6.39451	1.61066e-10	6.45834e-09	Upregulated	HW_vs_CW	obesity_upregulated
E2f8	Fancb	TRUE	1	taipale_cyt_meth__E2F8_NTTTCCCGCCAAAN_eDBD	4.67	r80__500bp_up_and_100bp_down_tss.mc9nr.feather	w0.001	0.6	0.00677668	172.3	0.709406	0.261636	2.71142	0.00669951	0.0272287	Upregulated	HW_vs_CW	obesity_upregulated
E2f8	Fancg	TRUE	4	taipale_cyt_meth__E2F8_NTTTCCCGCCAAAN_eDBD	4.67	r80__500bp_up_and_100bp_down_tss.mc9nr.feather	w0.001	0.9	0.0179613	623.012	0.561455	0.191517	2.93161	0.00337205	0.015697	Upregulated	HW_vs_CW	obesity_upregulated
E2f8	Fbxo33	TRUE	3	taipale_cyt_meth__E2F8_NTTTCCCGCCAAAN_eDBD	4.67	r80__500bp_up_and_100bp_down_tss.mc9nr.feather	w0.001	0.3	0.0041956	1210.13	0.568651	0.222336	2.55762	0.010539	0.0392143	Upregulated	HW_vs_CW	obesity_upregulated
E2f8	Fchsd2	TRUE	2	taipale_cyt_meth__E2F8_NTTTCCCGCCAAAN_eDBD	4.67	r80__500bp_up_and_100bp_down_tss.mc9nr.feather	w0.001	0.3	0.00157284	1726.46	0.512377	0.150761	3.39861	0.0006773	0.00415996	Upregulated	HW_vs_CW	obesity_upregulated
E2f8	Fgf13	TRUE	4	taipale_cyt_meth__E2F8_NTTTCCCGCCAAAN_eDBD	4.67	r80__500bp_up_and_100bp_down_tss.mc9nr.feather	w0.001	0.7	0.0190438	2441.41	3.64055	0.342941	10.6157	2.51953e-26	1.18346e-23	Upregulated	HW_vs_CW	obesity_upregulated
E2f8	Fgr	TRUE	1	taipale_cyt_meth__E2F8_NTTTCCCGCCAAAN_eDBD	4.67	r80__500bp_up_and_100bp_down_tss.mc9nr.feather	w0.001	0.6	0.00114946	284.273	1.66419	0.356236	4.67159	2.98883e-06	4.06366e-05	Upregulated	HW_vs_CW	obesity_upregulated
E2f8	Fhod1	TRUE	4	taipale_cyt_meth__E2F8_NTTTCCCGCCAAAN_eDBD	4.67	r80__500bp_up_and_100bp_down_tss.mc9nr.feather	w0.001	0.6	0.0154684	2822.51	0.503221	0.195524	2.5737	0.0100617	0.0378091	Upregulated	HW_vs_CW	obesity_upregulated
E2f8	Fkbp10	TRUE	4	taipale_cyt_meth__E2F8_NTTTCCCGCCAAAN_eDBD	4.67	r80__500bp_up_and_100bp_down_tss.mc9nr.feather	w0.001	0.1	0.00230321	1462.36	0.637623	0.156179	4.08264	4.45263e-05	0.000417497	Upregulated	HW_vs_CW	obesity_upregulated
E2f8	Flot1	TRUE	4	taipale_cyt_meth__E2F8_NTTTCCCGCCAAAN_eDBD	4.67	r80__500bp_up_and_100bp_down_tss.mc9nr.feather	w0.001	0.3	0.00266497	5285.36	1.07016	0.17224	6.2132	5.19149e-10	1.82559e-08	Upregulated	HW_vs_CW	obesity_upregulated
E2f8	Fmr1	TRUE	4	taipale_cyt_meth__E2F8_NTTTCCCGCCAAAN_eDBD	4.67	r80__500bp_up_and_100bp_down_tss.mc9nr.feather	w0.001	0.5	0.00875595	17442.7	2.40433	0.234991	10.2316	1.43167e-24	5.64881e-22	Upregulated	HW_vs_CW	obesity_upregulated
E2f8	G730013B05Rik	TRUE	3	taipale_cyt_meth__E2F8_NTTTCCCGCCAAAN_eDBD	4.67	r80__500bp_up_and_100bp_down_tss.mc9nr.feather	w0.001	0.9	0.0166841	20.0093	2.2933	0.617035	3.71664	0.000201891	0.00152485	Upregulated	HW_vs_CW	obesity_upregulated
E2f8	Gab1	TRUE	4	taipale_cyt_meth__E2F8_NTTTCCCGCCAAAN_eDBD	4.67	r80__500bp_up_and_100bp_down_tss.mc9nr.feather	w0.001	0.3	0.00873359	2547.59	0.502201	0.154917	3.24175	0.00118798	0.00664866	Upregulated	HW_vs_CW	obesity_upregulated
E2f8	Galnt10	TRUE	3	taipale_cyt_meth__E2F8_NTTTCCCGCCAAAN_eDBD	4.67	r80__500bp_up_and_100bp_down_tss.mc9nr.feather	w0.001	0.3	0.00206657	3054.84	0.699767	0.214189	3.26705	0.00108676	0.00617633	Upregulated	HW_vs_CW	obesity_upregulated
E2f8	Gins1	TRUE	4	taipale_cyt_meth__E2F8_NTTTCCCGCCAAAN_eDBD	4.67	r80__500bp_up_and_100bp_down_tss.mc9nr.feather	w0.001	0.307794	0.00320746	136.144	0.539727	0.215098	2.50922	0.0120999	0.0437193	Upregulated	HW_vs_CW	obesity_upregulated
E2f8	Gins2	TRUE	4	taipale_cyt_meth__E2F8_NTTTCCCGCCAAAN_eDBD	4.67	r80__500bp_up_and_100bp_down_tss.mc9nr.feather	w0.001	0.5	0.00868831	341.141	0.874331	0.243135	3.59607	0.000323059	0.0022457	Upregulated	HW_vs_CW	obesity_upregulated
E2f8	Gins3	TRUE	4	taipale_cyt_meth__E2F8_NTTTCCCGCCAAAN_eDBD	4.67	r80__500bp_up_and_100bp_down_tss.mc9nr.feather	w0.001	0.3	0.0025314	169.09	0.713568	0.21509	3.31753	0.000908159	0.00532743	Upregulated	HW_vs_CW	obesity_upregulated
E2f8	Gm13375	TRUE	4	taipale_cyt_meth__E2F8_NTTTCCCGCCAAAN_eDBD	4.67	r80__500bp_up_and_100bp_down_tss.mc9nr.feather	w0.001	0.7	0.0111608	251.155	0.621199	0.235238	2.64073	0.00827278	0.0323179	Upregulated	HW_vs_CW	obesity_upregulated
E2f8	Gm5144	TRUE	4	taipale_cyt_meth__E2F8_NTTTCCCGCCAAAN_eDBD	4.67	r80__500bp_up_and_100bp_down_tss.mc9nr.feather	w0.001	0.9	0.00732665	69.2005	2.07726	0.454679	4.56862	4.90939e-06	6.26066e-05	Upregulated	HW_vs_CW	obesity_upregulated
E2f8	Gmfb	TRUE	4	taipale_cyt_meth__E2F8_NTTTCCCGCCAAAN_eDBD	4.67	r80__500bp_up_and_100bp_down_tss.mc9nr.feather	w0.001	0.3	0.0028169	9458.19	0.502391	0.118722	4.23165	2.31984e-05	0.000239989	Upregulated	HW_vs_CW	obesity_upregulated
E2f8	Gna15	TRUE	4	taipale_cyt_meth__E2F8_NTTTCCCGCCAAAN_eDBD	4.67	r80__500bp_up_and_100bp_down_tss.mc9nr.feather	w0.001	0.6	0.0152905	244.89	0.700747	0.269205	2.60303	0.0092405	0.0353151	Upregulated	HW_vs_CW	obesity_upregulated
E2f8	Gprin1	TRUE	2	taipale_cyt_meth__E2F8_NTTTCCCGCCAAAN_eDBD	4.67	r80__500bp_up_and_100bp_down_tss.mc9nr.feather	w0.001	0.1	0.00167994	79.7895	1.64741	0.560381	2.9398	0.00328423	0.0153643	Upregulated	HW_vs_CW	obesity_upregulated
E2f8	Grb2	TRUE	3	taipale_cyt_meth__E2F8_NTTTCCCGCCAAAN_eDBD	4.67	r80__500bp_up_and_100bp_down_tss.mc9nr.feather	w0.001	0.5	0.00252547	6848.97	0.510424	0.141729	3.60142	0.000316487	0.00220858	Upregulated	HW_vs_CW	obesity_upregulated
E2f8	Gypc	TRUE	1	taipale_cyt_meth__E2F8_NTTTCCCGCCAAAN_eDBD	4.67	r80__500bp_up_and_100bp_down_tss.mc9nr.feather	w0.001	0.6	0.0119373	2249.4	0.683927	0.193788	3.52926	0.000416725	0.00276993	Upregulated	HW_vs_CW	obesity_upregulated
E2f8	Hapln3	TRUE	4	taipale_cyt_meth__E2F8_NTTTCCCGCCAAAN_eDBD	4.67	r80__500bp_up_and_100bp_down_tss.mc9nr.feather	w0.001	1	0.00881228	156.146	1.40534	0.354199	3.96765	7.25838e-05	0.000636697	Upregulated	HW_vs_CW	obesity_upregulated
E2f8	Haus6	TRUE	4	taipale_cyt_meth__E2F8_NTTTCCCGCCAAAN_eDBD	4.67	r80__500bp_up_and_100bp_down_tss.mc9nr.feather	w0.001	0.1	0.00551848	673.89	0.54594	0.131767	4.14321	3.42475e-05	0.000335469	Upregulated	HW_vs_CW	obesity_upregulated
E2f8	Hells	TRUE	4	taipale_cyt_meth__E2F8_NTTTCCCGCCAAAN_eDBD	4.67	r80__500bp_up_and_100bp_down_tss.mc9nr.feather	w0.001	0.5	0.00192255	173.075	1.36648	0.320173	4.26793	1.97294e-05	0.00020881	Upregulated	HW_vs_CW	obesity_upregulated
E2f8	Hic1	TRUE	4	taipale_cyt_meth__E2F8_NTTTCCCGCCAAAN_eDBD	4.67	r80__500bp_up_and_100bp_down_tss.mc9nr.feather	w0.001	0.3	0.00546485	1927.24	0.636726	0.241293	2.63881	0.00831978	0.0324629	Upregulated	HW_vs_CW	obesity_upregulated
E2f8	Hipk2	TRUE	3	taipale_cyt_meth__E2F8_NTTTCCCGCCAAAN_eDBD	4.67	r80__500bp_up_and_100bp_down_tss.mc9nr.feather	w0.001	0.7	0.00475365	10674.3	0.934658	0.190646	4.90257	9.45888e-07	1.46013e-05	Upregulated	HW_vs_CW	obesity_upregulated
E2f8	Hltf	TRUE	4	taipale_cyt_meth__E2F8_NTTTCCCGCCAAAN_eDBD	4.67	r80__500bp_up_and_100bp_down_tss.mc9nr.feather	w0.001	0.1	0.00108635	1656.38	0.718552	0.11859	6.05911	1.36874e-09	4.36933e-08	Upregulated	HW_vs_CW	obesity_upregulated
E2f8	Hmga2	TRUE	4	taipale_cyt_meth__E2F8_NTTTCCCGCCAAAN_eDBD	4.67	r80__500bp_up_and_100bp_down_tss.mc9nr.feather	w0.001	0.5	0.0019337	44.1691	4.7283	1.23414	3.83126	0.000127489	0.00102741	Upregulated	HW_vs_CW	obesity_upregulated
E2f8	Hmga2-ps1	TRUE	3	taipale_cyt_meth__E2F8_NTTTCCCGCCAAAN_eDBD	4.67	r80__500bp_up_and_100bp_down_tss.mc9nr.feather	w0.001	0.7	0.0426669	469.248	1.1753	0.333216	3.52714	0.000420073	0.00278727	Upregulated	HW_vs_CW	obesity_upregulated
E2f8	Hmgn5	TRUE	4	taipale_cyt_meth__E2F8_NTTTCCCGCCAAAN_eDBD	4.67	r80__500bp_up_and_100bp_down_tss.mc9nr.feather	w0.001	0.1	0.00162494	1748.64	0.568147	0.174161	3.2622	0.00110552	0.00627078	Upregulated	HW_vs_CW	obesity_upregulated
E2f8	Hspa12a	TRUE	1	taipale_cyt_meth__E2F8_NTTTCCCGCCAAAN_eDBD	4.67	r80__500bp_up_and_100bp_down_tss.mc9nr.feather	w0.001	0.6	0.00483708	6407.3	1.47896	0.243479	6.07428	1.24547e-09	4.04124e-08	Upregulated	HW_vs_CW	obesity_upregulated
E2f8	Hspa13	TRUE	3	taipale_cyt_meth__E2F8_NTTTCCCGCCAAAN_eDBD	4.67	r80__500bp_up_and_100bp_down_tss.mc9nr.feather	w0.001	0.3	0.00169714	2991.85	0.507783	0.151586	3.34981	0.000808676	0.00483002	Upregulated	HW_vs_CW	obesity_upregulated
E2f8	Hspg2	TRUE	3	taipale_cyt_meth__E2F8_NTTTCCCGCCAAAN_eDBD	4.67	r80__500bp_up_and_100bp_down_tss.mc9nr.feather	w0.001	0.7	0.0204228	77646.8	0.582711	0.237058	2.45809	0.0139677	0.0489788	Upregulated	HW_vs_CW	obesity_upregulated
E2f8	Hydin	TRUE	1	taipale_cyt_meth__E2F8_NTTTCCCGCCAAAN_eDBD	4.67	r80__500bp_up_and_100bp_down_tss.mc9nr.feather	w0.001	1	0.0225579	147.169	2.94079	0.508725	5.78071	7.43857e-09	1.99479e-07	Upregulated	HW_vs_CW	obesity_upregulated
E2f8	Igsf9	TRUE	3	taipale_cyt_meth__E2F8_NTTTCCCGCCAAAN_eDBD	4.67	r80__500bp_up_and_100bp_down_tss.mc9nr.feather	w0.001	0.4	0.00627342	243.128	0.607146	0.21985	2.76164	0.00575118	0.0241044	Upregulated	HW_vs_CW	obesity_upregulated
E2f8	Incenp	TRUE	1	taipale_cyt_meth__E2F8_NTTTCCCGCCAAAN_eDBD	4.67	r80__500bp_up_and_100bp_down_tss.mc9nr.feather	w0.001	0.5	0.00699551	753.902	0.861274	0.259495	3.31904	0.000903274	0.00530509	Upregulated	HW_vs_CW	obesity_upregulated
E2f8	Inhbb	TRUE	4	taipale_cyt_meth__E2F8_NTTTCCCGCCAAAN_eDBD	4.67	r80__500bp_up_and_100bp_down_tss.mc9nr.feather	w0.001	0.9	0.0438062	3427.91	0.596045	0.215888	2.7609	0.00576429	0.024149	Upregulated	HW_vs_CW	obesity_upregulated
E2f8	Iqcg	TRUE	4	taipale_cyt_meth__E2F8_NTTTCCCGCCAAAN_eDBD	4.67	r80__500bp_up_and_100bp_down_tss.mc9nr.feather	w0.001	0.1	0.00173195	69.5379	1.23081	0.49846	2.46922	0.0135409	0.0478392	Upregulated	HW_vs_CW	obesity_upregulated
E2f8	Itpripl1	TRUE	1	taipale_cyt_meth__E2F8_NTTTCCCGCCAAAN_eDBD	4.67	r80__500bp_up_and_100bp_down_tss.mc9nr.feather	w0.001	0.9	0.027424	1809.76	0.73236	0.171207	4.27762	1.889e-05	0.000200788	Upregulated	HW_vs_CW	obesity_upregulated
E2f8	Jade3	TRUE	3	taipale_cyt_meth__E2F8_NTTTCCCGCCAAAN_eDBD	4.67	r80__500bp_up_and_100bp_down_tss.mc9nr.feather	w0.001	0.5	0.00524951	816.832	0.720095	0.167296	4.30431	1.67505e-05	0.000180872	Upregulated	HW_vs_CW	obesity_upregulated
E2f8	Kcna3	TRUE	4	taipale_cyt_meth__E2F8_NTTTCCCGCCAAAN_eDBD	4.67	r80__500bp_up_and_100bp_down_tss.mc9nr.feather	w0.001	0.7	0.0154321	13.9362	2.43938	0.868703	2.80807	0.00498397	0.0214842	Upregulated	HW_vs_CW	obesity_upregulated
E2f8	Kcnk2	TRUE	4	taipale_cyt_meth__E2F8_NTTTCCCGCCAAAN_eDBD	4.67	r80__500bp_up_and_100bp_down_tss.mc9nr.feather	w0.001	0.3	0.00139202	584.257	1.33973	0.349099	3.83768	0.000124203	0.00100834	Upregulated	HW_vs_CW	obesity_upregulated
E2f8	Kctd12b	TRUE	1	taipale_cyt_meth__E2F8_NTTTCCCGCCAAAN_eDBD	4.67	r80__500bp_up_and_100bp_down_tss.mc9nr.feather	w0.001	0.9	0.0129919	3882.35	0.612511	0.20195	3.03298	0.00242148	0.0119278	Upregulated	HW_vs_CW	obesity_upregulated
E2f8	Kdelr3	TRUE	1	taipale_cyt_meth__E2F8_NTTTCCCGCCAAAN_eDBD	4.67	r80__500bp_up_and_100bp_down_tss.mc9nr.feather	w0.001	0.3	0.00618668	461.499	1.43728	0.198221	7.25089	4.14035e-13	2.60961e-11	Upregulated	HW_vs_CW	obesity_upregulated
E2f8	Kif11	TRUE	3	taipale_cyt_meth__E2F8_NTTTCCCGCCAAAN_eDBD	4.67	r80__500bp_up_and_100bp_down_tss.mc9nr.feather	w0.001	0.8	0.00946222	283.522	1.34989	0.280157	4.81834	1.44758e-06	2.13278e-05	Upregulated	HW_vs_CW	obesity_upregulated
E2f8	Kif15	TRUE	4	taipale_cyt_meth__E2F8_NTTTCCCGCCAAAN_eDBD	4.67	r80__500bp_up_and_100bp_down_tss.mc9nr.feather	w0.001	0.9	0.0136347	100.323	1.20301	0.441855	2.72263	0.00647644	0.0264912	Upregulated	HW_vs_CW	obesity_upregulated
E2f8	Kif18a	TRUE	4	taipale_cyt_meth__E2F8_NTTTCCCGCCAAAN_eDBD	4.67	r80__500bp_up_and_100bp_down_tss.mc9nr.feather	w0.001	0.3	0.00176079	88.7621	1.43609	0.390952	3.67333	0.000239414	0.00175778	Upregulated	HW_vs_CW	obesity_upregulated
E2f8	Kif18b	TRUE	3	taipale_cyt_meth__E2F8_NTTTCCCGCCAAAN_eDBD	4.67	r80__500bp_up_and_100bp_down_tss.mc9nr.feather	w0.001	0.8	0.012848	72.5904	1.53078	0.585798	2.61315	0.00897119	0.0344796	Upregulated	HW_vs_CW	obesity_upregulated
E2f8	Kif21b	TRUE	4	taipale_cyt_meth__E2F8_NTTTCCCGCCAAAN_eDBD	4.67	r80__500bp_up_and_100bp_down_tss.mc9nr.feather	w0.001	0.3	0.0024658	1311.02	1.33758	0.313807	4.26244	2.02208e-05	0.00021321	Upregulated	HW_vs_CW	obesity_upregulated
E2f8	Kif24	TRUE	1	taipale_cyt_meth__E2F8_NTTTCCCGCCAAAN_eDBD	4.67	r80__500bp_up_and_100bp_down_tss.mc9nr.feather	w0.001	0.3	0.0045432	82.226	0.958548	0.307536	3.11686	0.00182789	0.00947466	Upregulated	HW_vs_CW	obesity_upregulated
E2f8	Kif4	TRUE	4	taipale_cyt_meth__E2F8_NTTTCCCGCCAAAN_eDBD	4.67	r80__500bp_up_and_100bp_down_tss.mc9nr.feather	w0.001	1	0.0300288	115.426	1.62476	0.346188	4.6933	2.68836e-06	3.69331e-05	Upregulated	HW_vs_CW	obesity_upregulated
E2f8	Kifc1	TRUE	2	taipale_cyt_meth__E2F8_NTTTCCCGCCAAAN_eDBD	4.67	r80__500bp_up_and_100bp_down_tss.mc9nr.feather	w0.001	0.9	0.0174936	156.917	1.5637	0.293906	5.32041	1.03535e-07	2.12764e-06	Upregulated	HW_vs_CW	obesity_upregulated
E2f8	Klf8	TRUE	3	taipale_cyt_meth__E2F8_NTTTCCCGCCAAAN_eDBD	4.67	r80__500bp_up_and_100bp_down_tss.mc9nr.feather	w0.001	0.5	0.0105148	253.392	0.906186	0.278283	3.25634	0.00112858	0.00637552	Upregulated	HW_vs_CW	obesity_upregulated
E2f8	Klhl4	TRUE	2	taipale_cyt_meth__E2F8_NTTTCCCGCCAAAN_eDBD	4.67	r80__500bp_up_and_100bp_down_tss.mc9nr.feather	w0.001	0.3	0.0102059	575.029	0.672984	0.138013	4.87622	1.08139e-06	1.64739e-05	Upregulated	HW_vs_CW	obesity_upregulated
E2f8	Klhl5	TRUE	2	taipale_cyt_meth__E2F8_NTTTCCCGCCAAAN_eDBD	4.67	r80__500bp_up_and_100bp_down_tss.mc9nr.feather	w0.001	0.5	0.00472331	7226.43	0.903586	0.189442	4.76972	1.84484e-06	2.64691e-05	Upregulated	HW_vs_CW	obesity_upregulated
E2f8	Kntc1	TRUE	4	taipale_cyt_meth__E2F8_NTTTCCCGCCAAAN_eDBD	4.67	r80__500bp_up_and_100bp_down_tss.mc9nr.feather	w0.001	0.9	0.0078741	109.144	2.11238	0.387202	5.4555	4.88351e-08	1.08371e-06	Upregulated	HW_vs_CW	obesity_upregulated
E2f8	Lasp1	TRUE	3	taipale_cyt_meth__E2F8_NTTTCCCGCCAAAN_eDBD	4.67	r80__500bp_up_and_100bp_down_tss.mc9nr.feather	w0.001	0.9	0.0142204	18309	0.610133	0.17979	3.39359	0.000689821	0.00421978	Upregulated	HW_vs_CW	obesity_upregulated
E2f8	Lbh	TRUE	1	taipale_cyt_meth__E2F8_NTTTCCCGCCAAAN_eDBD	4.67	r80__500bp_up_and_100bp_down_tss.mc9nr.feather	w0.001	0.3	0.0037701	3769.79	0.625355	0.242759	2.57603	0.0099941	0.0375927	Upregulated	HW_vs_CW	obesity_upregulated
E2f8	Lep	TRUE	2	taipale_cyt_meth__E2F8_NTTTCCCGCCAAAN_eDBD	4.67	r80__500bp_up_and_100bp_down_tss.mc9nr.feather	w0.001	0.8	0.0131271	72619.3	4.43931	0.509864	8.70685	3.1243e-18	4.93089e-16	Upregulated	HW_vs_CW	obesity_upregulated
E2f8	Lgals1	TRUE	4	taipale_cyt_meth__E2F8_NTTTCCCGCCAAAN_eDBD	4.67	r80__500bp_up_and_100bp_down_tss.mc9nr.feather	w0.001	0.7	0.0104726	65481.3	0.859495	0.234119	3.67119	0.000241425	0.0017686	Upregulated	HW_vs_CW	obesity_upregulated
E2f8	Lig4	TRUE	3	taipale_cyt_meth__E2F8_NTTTCCCGCCAAAN_eDBD	4.67	r80__500bp_up_and_100bp_down_tss.mc9nr.feather	w0.001	0.1	0.00471061	622.703	0.766131	0.182059	4.20815	2.57471e-05	0.000262773	Upregulated	HW_vs_CW	obesity_upregulated
E2f8	Limch1	TRUE	4	taipale_cyt_meth__E2F8_NTTTCCCGCCAAAN_eDBD	4.67	r80__500bp_up_and_100bp_down_tss.mc9nr.feather	w0.001	0.1	0.00374413	4997.38	0.703471	0.210379	3.34383	0.000826317	0.00491604	Upregulated	HW_vs_CW	obesity_upregulated
E2f8	Limd2	TRUE	1	taipale_cyt_meth__E2F8_NTTTCCCGCCAAAN_eDBD	4.67	r80__500bp_up_and_100bp_down_tss.mc9nr.feather	w0.001	0.3	0.00291611	929.268	0.701964	0.247808	2.83269	0.00461582	0.0201954	Upregulated	HW_vs_CW	obesity_upregulated
E2f8	Lix1l	TRUE	1	taipale_cyt_meth__E2F8_NTTTCCCGCCAAAN_eDBD	4.67	r80__500bp_up_and_100bp_down_tss.mc9nr.feather	w0.001	0.3	0.00227729	4759.87	0.501104	0.184987	2.70887	0.00675137	0.0274112	Upregulated	HW_vs_CW	obesity_upregulated
E2f8	Lmnb1	TRUE	3	taipale_cyt_meth__E2F8_NTTTCCCGCCAAAN_eDBD	4.67	r80__500bp_up_and_100bp_down_tss.mc9nr.feather	w0.001	0.3	0.00822786	673.02	0.978508	0.156244	6.26269	3.78386e-10	1.38494e-08	Upregulated	HW_vs_CW	obesity_upregulated
E2f8	Lmo2	TRUE	2	taipale_cyt_meth__E2F8_NTTTCCCGCCAAAN_eDBD	4.67	r80__500bp_up_and_100bp_down_tss.mc9nr.feather	w0.001	0.3	0.0013017	2090.7	0.835825	0.244442	3.41932	0.000627783	0.00390076	Upregulated	HW_vs_CW	obesity_upregulated
E2f8	Loxl4	TRUE	3	taipale_cyt_meth__E2F8_NTTTCCCGCCAAAN_eDBD	4.67	r80__500bp_up_and_100bp_down_tss.mc9nr.feather	w0.001	0.4	0.0113115	329.313	0.714088	0.18376	3.88598	0.000101919	0.000851611	Upregulated	HW_vs_CW	obesity_upregulated
E2f8	Lpar3	TRUE	1	taipale_cyt_meth__E2F8_NTTTCCCGCCAAAN_eDBD	4.67	r80__500bp_up_and_100bp_down_tss.mc9nr.feather	w0.001	0.9	0.014195	216.989	1.78973	0.489572	3.65571	0.000256475	0.00185407	Upregulated	HW_vs_CW	obesity_upregulated
E2f8	Lpgat1	TRUE	1	taipale_cyt_meth__E2F8_NTTTCCCGCCAAAN_eDBD	4.67	r80__500bp_up_and_100bp_down_tss.mc9nr.feather	w0.001	0.9	0.0094214	28378.8	2.21801	0.260298	8.52102	1.58156e-17	2.12252e-15	Upregulated	HW_vs_CW	obesity_upregulated
E2f8	Lrr1	TRUE	4	taipale_cyt_meth__E2F8_NTTTCCCGCCAAAN_eDBD	4.67	r80__500bp_up_and_100bp_down_tss.mc9nr.feather	w0.001	0.718185	0.0266003	10.554	3.49266	1.01658	3.4357	0.000591036	0.00370864	Upregulated	HW_vs_CW	obesity_upregulated
E2f8	Lsm3	TRUE	3	taipale_cyt_meth__E2F8_NTTTCCCGCCAAAN_eDBD	4.67	r80__500bp_up_and_100bp_down_tss.mc9nr.feather	w0.001	0.9	0.00866768	1211.03	0.657426	0.165913	3.96247	7.41784e-05	0.000648954	Upregulated	HW_vs_CW	obesity_upregulated
E2f8	Ltc4s	TRUE	2	taipale_cyt_meth__E2F8_NTTTCCCGCCAAAN_eDBD	4.67	r80__500bp_up_and_100bp_down_tss.mc9nr.feather	w0.001	0.9	0.0233727	1927.8	0.720861	0.265984	2.71017	0.00672488	0.0273261	Upregulated	HW_vs_CW	obesity_upregulated
E2f8	Lypd1	TRUE	4	taipale_cyt_meth__E2F8_NTTTCCCGCCAAAN_eDBD	4.67	r80__500bp_up_and_100bp_down_tss.mc9nr.feather	w0.001	0.4	0.00405816	61.6998	1.77056	0.390583	4.53311	5.81203e-06	7.26614e-05	Upregulated	HW_vs_CW	obesity_upregulated
E2f8	Mad2l1	TRUE	4	taipale_cyt_meth__E2F8_NTTTCCCGCCAAAN_eDBD	4.67	r80__500bp_up_and_100bp_down_tss.mc9nr.feather	w0.001	0.5	0.00527146	438.871	0.605625	0.181243	3.34151	0.000833239	0.0049456	Upregulated	HW_vs_CW	obesity_upregulated
E2f8	Magi1	TRUE	4	taipale_cyt_meth__E2F8_NTTTCCCGCCAAAN_eDBD	4.67	r80__500bp_up_and_100bp_down_tss.mc9nr.feather	w0.001	0.5	0.00680013	2889.76	0.707543	0.191197	3.7006	0.000215088	0.00160851	Upregulated	HW_vs_CW	obesity_upregulated
E2f8	Mansc1	TRUE	2	taipale_cyt_meth__E2F8_NTTTCCCGCCAAAN_eDBD	4.67	r80__500bp_up_and_100bp_down_tss.mc9nr.feather	w0.001	0.1	0.0027755	447.665	0.745434	0.233984	3.18583	0.0014434	0.00780361	Upregulated	HW_vs_CW	obesity_upregulated
E2f8	Mapre2	TRUE	1	taipale_cyt_meth__E2F8_NTTTCCCGCCAAAN_eDBD	4.67	r80__500bp_up_and_100bp_down_tss.mc9nr.feather	w0.001	0.1	0.00106218	6327.64	0.648796	0.146869	4.41752	9.98404e-06	0.000115726	Upregulated	HW_vs_CW	obesity_upregulated
E2f8	Marcks	TRUE	2	taipale_cyt_meth__E2F8_NTTTCCCGCCAAAN_eDBD	4.67	r80__500bp_up_and_100bp_down_tss.mc9nr.feather	w0.001	0.5	0.00134425	7219.73	0.891335	0.291929	3.05326	0.00226368	0.0112887	Upregulated	HW_vs_CW	obesity_upregulated
E2f8	Mastl	TRUE	4	taipale_cyt_meth__E2F8_NTTTCCCGCCAAAN_eDBD	4.67	r80__500bp_up_and_100bp_down_tss.mc9nr.feather	w0.001	0.4	0.00348639	112.919	1.34462	0.307549	4.37206	1.23077e-05	0.000137996	Upregulated	HW_vs_CW	obesity_upregulated
E2f8	Mbnl3	TRUE	4	taipale_cyt_meth__E2F8_NTTTCCCGCCAAAN_eDBD	4.67	r80__500bp_up_and_100bp_down_tss.mc9nr.feather	w0.001	0.8	0.00546437	364.986	1.31628	0.273579	4.81132	1.49934e-06	2.19592e-05	Upregulated	HW_vs_CW	obesity_upregulated
E2f8	Mcm10	TRUE	3	taipale_cyt_meth__E2F8_NTTTCCCGCCAAAN_eDBD	4.67	r80__500bp_up_and_100bp_down_tss.mc9nr.feather	w0.001	0.4	0.00550447	151.643	1.4563	0.294659	4.94231	7.72005e-07	1.22232e-05	Upregulated	HW_vs_CW	obesity_upregulated
E2f8	Mcm2	TRUE	4	taipale_cyt_meth__E2F8_NTTTCCCGCCAAAN_eDBD	4.67	r80__500bp_up_and_100bp_down_tss.mc9nr.feather	w0.001	0.1	0.00199393	712.777	1.36966	0.315934	4.33526	1.45586e-05	0.000160454	Upregulated	HW_vs_CW	obesity_upregulated
E2f8	Mcm5	TRUE	4	taipale_cyt_meth__E2F8_NTTTCCCGCCAAAN_eDBD	4.67	r80__500bp_up_and_100bp_down_tss.mc9nr.feather	w0.001	0.5	0.00218988	613.744	1.34046	0.258414	5.18725	2.13426e-07	4.00616e-06	Upregulated	HW_vs_CW	obesity_upregulated
E2f8	Mcm6	TRUE	4	taipale_cyt_meth__E2F8_NTTTCCCGCCAAAN_eDBD	4.67	r80__500bp_up_and_100bp_down_tss.mc9nr.feather	w0.001	0.3	0.00164779	1384.83	0.712588	0.180792	3.94149	8.09773e-05	0.000698217	Upregulated	HW_vs_CW	obesity_upregulated
E2f8	Mef2c	TRUE	4	taipale_cyt_meth__E2F8_NTTTCCCGCCAAAN_eDBD	4.67	r80__500bp_up_and_100bp_down_tss.mc9nr.feather	w0.001	0.1	0.00314434	4064.35	1.14368	0.347125	3.29473	0.000985171	0.0056962	Upregulated	HW_vs_CW	obesity_upregulated
E2f8	Megf9	TRUE	2	taipale_cyt_meth__E2F8_NTTTCCCGCCAAAN_eDBD	4.67	r80__500bp_up_and_100bp_down_tss.mc9nr.feather	w0.001	0.7	0.00140179	3931.64	0.658729	0.137419	4.79356	1.63844e-06	2.36974e-05	Upregulated	HW_vs_CW	obesity_upregulated
E2f8	Meox2	TRUE	4	taipale_cyt_meth__E2F8_NTTTCCCGCCAAAN_eDBD	4.67	r80__500bp_up_and_100bp_down_tss.mc9nr.feather	w0.001	0.7	0.0162058	3070.35	0.837891	0.231365	3.62152	0.000292881	0.0020678	Upregulated	HW_vs_CW	obesity_upregulated
E2f8	Mest	TRUE	2	taipale_cyt_meth__E2F8_NTTTCCCGCCAAAN_eDBD	4.67	r80__500bp_up_and_100bp_down_tss.mc9nr.feather	w0.001	0.8	0.00624029	20384.4	3.65543	0.703545	5.19573	2.03914e-07	3.84958e-06	Upregulated	HW_vs_CW	obesity_upregulated
E2f8	Mfsd13a	TRUE	1	taipale_cyt_meth__E2F8_NTTTCCCGCCAAAN_eDBD	4.67	r80__500bp_up_and_100bp_down_tss.mc9nr.feather	w0.001	0.1	0.00119895	383.37	0.785707	0.175108	4.48699	7.22379e-06	8.79154e-05	Upregulated	HW_vs_CW	obesity_upregulated
E2f8	Mgmt	TRUE	3	taipale_cyt_meth__E2F8_NTTTCCCGCCAAAN_eDBD	4.67	r80__500bp_up_and_100bp_down_tss.mc9nr.feather	w0.001	0.4	0.00232166	827.363	1.00677	0.215357	4.67492	2.94069e-06	4.00649e-05	Upregulated	HW_vs_CW	obesity_upregulated
E2f8	Mki67	TRUE	5	taipale_cyt_meth__E2F8_NTTTCCCGCCAAAN_eDBD	4.67	r80__500bp_up_and_100bp_down_tss.mc9nr.feather	w0.001	0.9	0.0248973	1260.85	2.0237	0.29865	6.77614	1.23429e-11	6.14903e-10	Upregulated	HW_vs_CW	obesity_upregulated
E2f8	Mmd	TRUE	2	taipale_cyt_meth__E2F8_NTTTCCCGCCAAAN_eDBD	4.67	r80__500bp_up_and_100bp_down_tss.mc9nr.feather	w0.001	0.9	0.0388541	41366.8	0.906448	0.240512	3.76883	0.000164013	0.00127588	Upregulated	HW_vs_CW	obesity_upregulated
E2f8	Mms22l	TRUE	4	taipale_cyt_meth__E2F8_NTTTCCCGCCAAAN_eDBD	4.67	r80__500bp_up_and_100bp_down_tss.mc9nr.feather	w0.001	0.5	0.00332445	219.102	1.66697	0.268566	6.20694	5.40252e-10	1.88973e-08	Upregulated	HW_vs_CW	obesity_upregulated
E2f8	Mpp4	TRUE	1	taipale_cyt_meth__E2F8_NTTTCCCGCCAAAN_eDBD	4.67	r80__500bp_up_and_100bp_down_tss.mc9nr.feather	w0.001	0.9	0.0228409	138.921	1.80556	0.273383	6.60453	3.98794e-11	1.78399e-09	Upregulated	HW_vs_CW	obesity_upregulated
E2f8	Mrc2	TRUE	2	taipale_cyt_meth__E2F8_NTTTCCCGCCAAAN_eDBD	4.67	r80__500bp_up_and_100bp_down_tss.mc9nr.feather	w0.001	0.5	0.00286378	5934.39	2.23509	0.362688	6.16258	7.15685e-10	2.42375e-08	Upregulated	HW_vs_CW	obesity_upregulated
E2f8	Mtss1	TRUE	4	taipale_cyt_meth__E2F8_NTTTCCCGCCAAAN_eDBD	4.67	r80__500bp_up_and_100bp_down_tss.mc9nr.feather	w0.001	0.3	0.0050956	4349.7	0.608842	0.111096	5.48032	4.24546e-08	9.64912e-07	Upregulated	HW_vs_CW	obesity_upregulated
E2f8	Mutyh	TRUE	4	taipale_cyt_meth__E2F8_NTTTCCCGCCAAAN_eDBD	4.67	r80__500bp_up_and_100bp_down_tss.mc9nr.feather	w0.001	0.5	0.00341872	180.168	1.18491	0.356476	3.32396	0.000887477	0.00522319	Upregulated	HW_vs_CW	obesity_upregulated
[truncated: 3,588 more rows]

## Sheet: Obesity downregulated
TF	gene	highConfAnnot	nMotifs	bestMotif	NES	motifDb	coexModule	spearCor	CoexWeight	baseMean	log2FoldChange	lfcSE	stat	pvalue	padj	change	comparison	group
[truncated: 1,216 more rows]

[truncated: 2 more sheets: TTC upregulated, TTC downregulated]
