# Supplementary material for: Tibetan tea consumption prevents obesity by modulating the cellular composition and metabolic reprogramming of white adipose tissue
Source: Royal Society of Chemistry journal article supplement (doi:10.1039/d3fo03506a), 2023-11-16
Supplement: d3fo03506a6.xlsx [file d3fo03506a6.xlsx]

## Sheet: Sheet1
gene	p_val	avg_log2FC	pct.1	pct.2	p_val_adj	change	compare	cell_type
Cst3	9.87975e-85	-2.5208	0.067	0.694	2.43259e-80	Downregulated	HT vs HW	Endothelial cells
Vim	2.61927e-71	-2.23989	0.099	0.724	6.44916e-67	Downregulated	HT vs HW	Endothelial cells
Anxa2	7.8331e-68	-1.56841	0.067	0.619	1.92867e-63	Downregulated	HT vs HW	Endothelial cells
Pmepa1	5.96174e-67	-1.70108	0.041	0.522	1.4679e-62	Downregulated	HT vs HW	Endothelial cells
Timp2	9.28188e-65	-1.62286	0.024	0.433	2.28539e-60	Downregulated	HT vs HW	Endothelial cells
B2m	1.1569e-62	-2.05989	0.088	0.642	2.84853e-58	Downregulated	HT vs HW	Endothelial cells
P4hb	2.15009e-59	-1.1354	0.009	0.328	5.29395e-55	Downregulated	HT vs HW	Endothelial cells
Itm2b	1.16281e-58	-1.74281	0.087	0.619	2.86306e-54	Downregulated	HT vs HW	Endothelial cells
mt-Nd4	9.5228e-58	-1.8663	0.169	0.806	2.3447e-53	Downregulated	HT vs HW	Endothelial cells
Scd2	3.27375e-55	-1.18929	0.01	0.313	8.06062e-51	Downregulated	HT vs HW	Endothelial cells
Fn1	9.26871e-54	-1.86452	0.069	0.545	2.28214e-49	Downregulated	HT vs HW	Endothelial cells
mt-Co1	1.22644e-53	-1.59241	0.076	0.567	3.01973e-49	Downregulated	HT vs HW	Endothelial cells
Clu	7.29711e-53	-1.87575	0.088	0.597	1.7967e-48	Downregulated	HT vs HW	Endothelial cells
Tgoln1	1.3044e-52	-1.20344	0.022	0.366	3.21169e-48	Downregulated	HT vs HW	Endothelial cells
Neat1	4.01149e-52	-1.44021	0.122	0.701	9.8771e-48	Downregulated	HT vs HW	Endothelial cells
mt-Nd1	1.42094e-51	-1.58871	0.153	0.761	3.49864e-47	Downregulated	HT vs HW	Endothelial cells
Emp1	2.2647e-51	-1.69261	0.08	0.56	5.57614e-47	Downregulated	HT vs HW	Endothelial cells
Mgp	5.42428e-51	-2.90126	0.144	0.672	1.33557e-46	Downregulated	HT vs HW	Endothelial cells
Bsg	2.78207e-50	-1.28077	0.028	0.381	6.85e-46	Downregulated	HT vs HW	Endothelial cells
Serinc1	3.91843e-50	-1.31226	0.031	0.396	9.64795e-46	Downregulated	HT vs HW	Endothelial cells
Ctsd	9.10291e-50	-1.21758	0.009	0.284	2.24132e-45	Downregulated	HT vs HW	Endothelial cells
Ctsh	1.62502e-49	-1.2965	0.048	0.455	4.00112e-45	Downregulated	HT vs HW	Endothelial cells
Lox	1.41715e-48	-1.06366	0.026	0.366	3.48932e-44	Downregulated	HT vs HW	Endothelial cells
Atp6v0a1	2.75618e-47	-1.04292	0.026	0.358	6.78627e-43	Downregulated	HT vs HW	Endothelial cells
Htra1	9.04718e-47	-1.32924	0.061	0.485	2.2276e-42	Downregulated	HT vs HW	Endothelial cells
Fxyd5	1.32285e-46	-1.20267	0.046	0.433	3.25712e-42	Downregulated	HT vs HW	Endothelial cells
mt-Nd5	1.45297e-46	-1.37209	0.057	0.47	3.57751e-42	Downregulated	HT vs HW	Endothelial cells
Mycbp2	1.83166e-46	-1.2683	0.123	0.664	4.5099e-42	Downregulated	HT vs HW	Endothelial cells
Lamp1	5.6323e-46	-0.871783	0.001	0.209	1.38679e-41	Downregulated	HT vs HW	Endothelial cells
Bgn	2.51632e-45	-1.9757	0.123	0.612	6.19568e-41	Downregulated	HT vs HW	Endothelial cells
Rtn4	4.25888e-45	-1.52713	0.136	0.664	1.04862e-40	Downregulated	HT vs HW	Endothelial cells
mt-Cytb	6.43371e-45	-1.56309	0.201	0.791	1.58411e-40	Downregulated	HT vs HW	Endothelial cells
Arhgap44	6.69722e-45	-1.2155	0.08	0.545	1.64899e-40	Downregulated	HT vs HW	Endothelial cells
Pdia3	7.12643e-44	-1.04244	0.032	0.366	1.75467e-39	Downregulated	HT vs HW	Endothelial cells
Sulf2	4.3112e-43	-1.30502	0.06	0.463	1.0615e-38	Downregulated	HT vs HW	Endothelial cells
Cav2	4.8153e-42	-1.2051	0.079	0.515	1.18562e-37	Downregulated	HT vs HW	Endothelial cells
Cdk8	3.01292e-41	-1.54356	0.125	0.619	7.41841e-37	Downregulated	HT vs HW	Endothelial cells
mt-Nd2	3.08728e-41	-1.43076	0.162	0.701	7.6015e-37	Downregulated	HT vs HW	Endothelial cells
Tmbim6	5.94016e-41	-1.15133	0.068	0.47	1.46259e-36	Downregulated	HT vs HW	Endothelial cells
Tln2	8.47605e-41	-1.19076	0.047	0.403	2.08697e-36	Downregulated	HT vs HW	Endothelial cells
Tapbp	8.72003e-41	-1.25132	0.09	0.537	2.14705e-36	Downregulated	HT vs HW	Endothelial cells
Rpn2	1.23447e-40	-0.707355	0.004	0.209	3.03952e-36	Downregulated	HT vs HW	Endothelial cells
Myof	1.29791e-40	-1.47036	0.129	0.627	3.19572e-36	Downregulated	HT vs HW	Endothelial cells
Igfbp4	5.5795e-40	-1.69648	0.103	0.552	1.37379e-35	Downregulated	HT vs HW	Endothelial cells
Crip1	1.35937e-39	-1.52944	0.025	0.313	3.34704e-35	Downregulated	HT vs HW	Endothelial cells
H2-K1	1.39217e-39	-1.58139	0.196	0.739	3.42781e-35	Downregulated	HT vs HW	Endothelial cells
Tspo	1.89021e-39	-0.974817	0.014	0.261	4.65409e-35	Downregulated	HT vs HW	Endothelial cells
Fstl1	2.90189e-39	-1.42121	0.146	0.657	7.14504e-35	Downregulated	HT vs HW	Endothelial cells
Cytl1	4.02772e-39	-1.94083	0.089	0.507	9.91705e-35	Downregulated	HT vs HW	Endothelial cells
Atp1a1	2.59991e-38	-1.10887	0.058	0.425	6.40149e-34	Downregulated	HT vs HW	Endothelial cells
Psap	5.97355e-38	-1.08028	0.007	0.216	1.47081e-33	Downregulated	HT vs HW	Endothelial cells
Mfge8	6.9249e-38	-0.769818	0.006	0.209	1.70505e-33	Downregulated	HT vs HW	Endothelial cells
Hspa5	8.67844e-38	-0.870845	0.007	0.216	2.1368e-33	Downregulated	HT vs HW	Endothelial cells
Tmem109	1.03323e-37	-1.09498	0.04	0.358	2.54403e-33	Downregulated	HT vs HW	Endothelial cells
Ywhab	1.22323e-37	-0.932187	0.054	0.41	3.01184e-33	Downregulated	HT vs HW	Endothelial cells
Rps21	1.33072e-37	-1.19156	0.046	0.381	3.27649e-33	Downregulated	HT vs HW	Endothelial cells
Smpdl3a	3.03829e-37	-0.561186	0.005	0.201	7.48088e-33	Downregulated	HT vs HW	Endothelial cells
Bcar3	4.57975e-37	-1.08688	0.027	0.313	1.12763e-32	Downregulated	HT vs HW	Endothelial cells
Rplp1	5.24829e-37	-1.18751	0.018	0.269	1.29223e-32	Downregulated	HT vs HW	Endothelial cells
Tmsb4x	4.19878e-36	-1.79605	0.152	0.627	1.03382e-31	Downregulated	HT vs HW	Endothelial cells
Epb41l2	1.06369e-35	-1.18543	0.119	0.567	2.61902e-31	Downregulated	HT vs HW	Endothelial cells
Pdgfa	1.07784e-35	-0.662355	0.01	0.224	2.65385e-31	Downregulated	HT vs HW	Endothelial cells
Cachd1	1.39242e-35	-0.944559	0.042	0.358	3.42842e-31	Downregulated	HT vs HW	Endothelial cells
Cmklr1	1.65272e-35	-1.03868	0.044	0.366	4.06933e-31	Downregulated	HT vs HW	Endothelial cells
Cox4i1	1.71886e-35	-0.927227	0.009	0.216	4.23218e-31	Downregulated	HT vs HW	Endothelial cells
Ahnak	1.95685e-35	-1.48688	0.246	0.776	4.81815e-31	Downregulated	HT vs HW	Endothelial cells
Plcg2	4.89829e-35	-1.15922	0.133	0.612	1.20606e-30	Downregulated	HT vs HW	Endothelial cells
Col5a2	5.43681e-35	-1.5966	0.171	0.657	1.33865e-30	Downregulated	HT vs HW	Endothelial cells
Atp6ap1	9.91707e-35	-0.825463	0.022	0.276	2.44178e-30	Downregulated	HT vs HW	Endothelial cells
Bcap31	4.18651e-34	-0.601296	0.003	0.172	1.0308e-29	Downregulated	HT vs HW	Endothelial cells
Rpl26	4.72207e-34	-0.82538	0.013	0.231	1.16267e-29	Downregulated	HT vs HW	Endothelial cells
Gja5	4.75813e-34	-1.14335	0.111	0.545	1.17155e-29	Downregulated	HT vs HW	Endothelial cells
Nos1ap	6.51599e-34	-1.59084	0.128	0.567	1.60437e-29	Downregulated	HT vs HW	Endothelial cells
Hsd17b12	7.01888e-34	-0.69739	0.009	0.209	1.72819e-29	Downregulated	HT vs HW	Endothelial cells
Hsp90ab1	1.43032e-33	-1.21005	0.09	0.485	3.52173e-29	Downregulated	HT vs HW	Endothelial cells
Tmem30a	1.99616e-33	-1.01907	0.092	0.5	4.91495e-29	Downregulated	HT vs HW	Endothelial cells
Atp10a	3.44056e-33	-1.11261	0.066	0.418	8.47135e-29	Downregulated	HT vs HW	Endothelial cells
Tecr	4.80882e-33	-0.713731	0.007	0.194	1.18403e-28	Downregulated	HT vs HW	Endothelial cells
Sod3	6.82996e-33	-0.620005	0.007	0.194	1.68167e-28	Downregulated	HT vs HW	Endothelial cells
Ptprj	8.61031e-33	-1.46594	0.247	0.754	2.12003e-28	Downregulated	HT vs HW	Endothelial cells
Gas6	1.03687e-32	-0.972889	0.074	0.44	2.55298e-28	Downregulated	HT vs HW	Endothelial cells
Aggf1	1.75037e-32	-1.30543	0.109	0.522	4.30977e-28	Downregulated	HT vs HW	Endothelial cells
Ndufa13	2.23095e-32	-0.780177	0.002	0.157	5.49306e-28	Downregulated	HT vs HW	Endothelial cells
Dag1	4.15302e-32	-0.85454	0.042	0.336	1.02256e-27	Downregulated	HT vs HW	Endothelial cells
Tmem158	5.046e-32	-1.16167	0.026	0.276	1.24243e-27	Downregulated	HT vs HW	Endothelial cells
Marveld1	6.43997e-32	-1.04854	0.078	0.448	1.58565e-27	Downregulated	HT vs HW	Endothelial cells
Efna5	6.94114e-32	-1.84302	0.232	0.694	1.70905e-27	Downregulated	HT vs HW	Endothelial cells
Ssr3	7.66594e-32	-0.819398	0.007	0.187	1.88751e-27	Downregulated	HT vs HW	Endothelial cells
Plec	7.67609e-32	-1.23564	0.19	0.679	1.89001e-27	Downregulated	HT vs HW	Endothelial cells
Mall	8.36328e-32	-0.858996	0.083	0.463	2.05921e-27	Downregulated	HT vs HW	Endothelial cells
Pam	8.88505e-32	-1.30778	0.321	0.836	2.18768e-27	Downregulated	HT vs HW	Endothelial cells
Hsp90b1	1.24315e-31	-0.884033	0.024	0.269	3.0609e-27	Downregulated	HT vs HW	Endothelial cells
Vcam1	1.87528e-31	-1.79764	0.087	0.455	4.61732e-27	Downregulated	HT vs HW	Endothelial cells
Lmo2	2.47048e-31	-0.883771	0.1	0.507	6.08281e-27	Downregulated	HT vs HW	Endothelial cells
Angpt1	2.5901e-31	-1.22241	0.063	0.396	6.37734e-27	Downregulated	HT vs HW	Endothelial cells
Pard3	2.85885e-31	-1.05701	0.081	0.448	7.03905e-27	Downregulated	HT vs HW	Endothelial cells
Cd151	2.88822e-31	-0.832447	0.016	0.231	7.11137e-27	Downregulated	HT vs HW	Endothelial cells
Cyr61	5.43339e-31	-1.00683	0.021	0.254	1.33781e-26	Downregulated	HT vs HW	Endothelial cells
Reck	6.19242e-31	-0.954843	0.046	0.343	1.5247e-26	Downregulated	HT vs HW	Endothelial cells
Grn	7.40958e-31	-0.820048	0.004	0.164	1.82439e-26	Downregulated	HT vs HW	Endothelial cells
Enpp6	8.08812e-31	-0.916481	0.051	0.358	1.99146e-26	Downregulated	HT vs HW	Endothelial cells
Rps14	9.20391e-31	-1.20459	0.043	0.328	2.26619e-26	Downregulated	HT vs HW	Endothelial cells
Atp6ap2	1.12524e-30	-0.458827	0.003	0.157	2.77056e-26	Downregulated	HT vs HW	Endothelial cells
Atl2	1.20544e-30	-0.773116	0.027	0.276	2.96804e-26	Downregulated	HT vs HW	Endothelial cells
Mcfd2	1.43875e-30	-0.834126	0.033	0.299	3.54248e-26	Downregulated	HT vs HW	Endothelial cells
Canx	1.58961e-30	-1.077	0.074	0.418	3.91393e-26	Downregulated	HT vs HW	Endothelial cells
Cx3cl1	1.69453e-30	-0.873359	0.04	0.321	4.17227e-26	Downregulated	HT vs HW	Endothelial cells
Sypl	2.1523e-30	-0.989258	0.109	0.515	5.29939e-26	Downregulated	HT vs HW	Endothelial cells
Ntn4	2.68551e-30	-1.17046	0.049	0.343	6.61225e-26	Downregulated	HT vs HW	Endothelial cells
F2rl1	2.79429e-30	-0.748895	0.015	0.224	6.88011e-26	Downregulated	HT vs HW	Endothelial cells
Lsr	2.9026e-30	-0.688768	0.02	0.246	7.14678e-26	Downregulated	HT vs HW	Endothelial cells
Nuak1	3.75255e-30	-1.16177	0.183	0.664	9.23953e-26	Downregulated	HT vs HW	Endothelial cells
Adk	5.92106e-30	-1.10223	0.088	0.455	1.45788e-25	Downregulated	HT vs HW	Endothelial cells
Cd81	6.36321e-30	-1.26111	0.1	0.478	1.56675e-25	Downregulated	HT vs HW	Endothelial cells
Ghitm	7.84794e-30	-0.592109	0.011	0.201	1.93232e-25	Downregulated	HT vs HW	Endothelial cells
Cavin1	8.66206e-30	-1.19558	0.17	0.634	2.13277e-25	Downregulated	HT vs HW	Endothelial cells
Sdf4	1.17618e-29	-0.925018	0.047	0.336	2.89599e-25	Downregulated	HT vs HW	Endothelial cells
Bmx	1.28825e-29	-1.14219	0.167	0.634	3.17194e-25	Downregulated	HT vs HW	Endothelial cells
Uqcrq	1.36317e-29	-0.560002	0.006	0.172	3.35639e-25	Downregulated	HT vs HW	Endothelial cells
Kcnn4	2.08473e-29	-0.829789	0.033	0.291	5.13303e-25	Downregulated	HT vs HW	Endothelial cells
Pltp	2.89121e-29	-0.662196	0.009	0.187	7.11873e-25	Downregulated	HT vs HW	Endothelial cells
Fzd4	3.01957e-29	-0.996993	0.083	0.44	7.43478e-25	Downregulated	HT vs HW	Endothelial cells
Atp5a1	3.15959e-29	-0.981892	0.031	0.284	7.77954e-25	Downregulated	HT vs HW	Endothelial cells
Sdc1	4.48031e-29	-0.600241	0.009	0.187	1.10314e-24	Downregulated	HT vs HW	Endothelial cells
Mknk2	6.84605e-29	-0.582408	0.012	0.201	1.68564e-24	Downregulated	HT vs HW	Endothelial cells
Slc4a4	9.71123e-29	-1.04557	0.096	0.47	2.3911e-24	Downregulated	HT vs HW	Endothelial cells
Tnfaip8	1.05614e-28	-1.13932	0.121	0.522	2.60042e-24	Downregulated	HT vs HW	Endothelial cells
Tmem135	1.46127e-28	-0.964914	0.107	0.5	3.59794e-24	Downregulated	HT vs HW	Endothelial cells
Selenof	1.91765e-28	-0.823382	0.026	0.261	4.72165e-24	Downregulated	HT vs HW	Endothelial cells
Selenok	2.11329e-28	-0.762363	0.007	0.172	5.20333e-24	Downregulated	HT vs HW	Endothelial cells
Arl6ip1	2.15688e-28	-0.830493	0.035	0.291	5.31066e-24	Downregulated	HT vs HW	Endothelial cells
Lman2	2.56864e-28	-0.662563	0.016	0.216	6.3245e-24	Downregulated	HT vs HW	Endothelial cells
Cacna1a	2.70152e-28	-0.945427	0.07	0.403	6.65169e-24	Downregulated	HT vs HW	Endothelial cells
Kirrel	3.23345e-28	-0.853494	0.041	0.306	7.9614e-24	Downregulated	HT vs HW	Endothelial cells
Ssr1	3.91283e-28	-0.687452	0.013	0.201	9.63417e-24	Downregulated	HT vs HW	Endothelial cells
Selenop	4.57948e-28	-0.730813	0.01	0.187	1.12756e-23	Downregulated	HT vs HW	Endothelial cells
Cers2	5.10464e-28	-0.66645	0.018	0.224	1.25686e-23	Downregulated	HT vs HW	Endothelial cells
Ehd4	7.12926e-28	-1.21688	0.265	0.746	1.75537e-23	Downregulated	HT vs HW	Endothelial cells
Erp29	8.04203e-28	-0.565095	0.01	0.187	1.98011e-23	Downregulated	HT vs HW	Endothelial cells
Atp5g3	8.46978e-28	-0.591668	0.005	0.157	2.08543e-23	Downregulated	HT vs HW	Endothelial cells
Sirpa	8.67578e-28	-0.513886	0.005	0.157	2.13615e-23	Downregulated	HT vs HW	Endothelial cells
Prdm16	1.28011e-27	-1.29945	0.182	0.619	3.15189e-23	Downregulated	HT vs HW	Endothelial cells
Pttg1ip	1.35465e-27	-0.662756	0.035	0.291	3.33541e-23	Downregulated	HT vs HW	Endothelial cells
Npc2	1.37036e-27	-0.627844	0.004	0.149	3.37411e-23	Downregulated	HT vs HW	Endothelial cells
Aldoa	1.7021e-27	-1.03884	0.003	0.142	4.19091e-23	Downregulated	HT vs HW	Endothelial cells
Arhgap20	1.80335e-27	-0.878044	0.024	0.246	4.44021e-23	Downregulated	HT vs HW	Endothelial cells
Rps5	2.03441e-27	-0.765641	0.03	0.269	5.00914e-23	Downregulated	HT vs HW	Endothelial cells
Phf8	2.3215e-27	-0.660332	0.017	0.216	5.716e-23	Downregulated	HT vs HW	Endothelial cells
Podxl	2.91624e-27	-1.40589	0.233	0.679	7.18035e-23	Downregulated	HT vs HW	Endothelial cells
Lrrc32	4.88139e-27	-0.782524	0.093	0.455	1.2019e-22	Downregulated	HT vs HW	Endothelial cells
Col18a1	4.93617e-27	-1.22367	0.089	0.433	1.21538e-22	Downregulated	HT vs HW	Endothelial cells
Sod1	5.32555e-27	-0.662874	0.019	0.224	1.31126e-22	Downregulated	HT vs HW	Endothelial cells
Eln	5.37619e-27	-1.82797	0.403	0.791	1.32373e-22	Downregulated	HT vs HW	Endothelial cells
Cavin3	6.25215e-27	-0.77834	0.016	0.209	1.5394e-22	Downregulated	HT vs HW	Endothelial cells
Ly6a	6.93272e-27	-1.29209	0.134	0.53	1.70697e-22	Downregulated	HT vs HW	Endothelial cells
Sgms2	8.53712e-27	-0.875299	0.033	0.276	2.10201e-22	Downregulated	HT vs HW	Endothelial cells
S100a6	1.80906e-26	-1.10037	0.015	0.201	4.45428e-22	Downregulated	HT vs HW	Endothelial cells
Bcam	2.70878e-26	-0.798948	0.106	0.485	6.66955e-22	Downregulated	HT vs HW	Endothelial cells
Ppib	2.97355e-26	-0.48676	0.005	0.149	7.32147e-22	Downregulated	HT vs HW	Endothelial cells
Lhfpl2	3.04509e-26	-0.857224	0.005	0.149	7.49762e-22	Downregulated	HT vs HW	Endothelial cells
Minos1	3.09794e-26	-0.840551	0.03	0.261	7.62774e-22	Downregulated	HT vs HW	Endothelial cells
Emp3	3.83112e-26	-0.435451	0	0.112	9.43298e-22	Downregulated	HT vs HW	Endothelial cells
Actb	4.42085e-26	-1.48813	0.07	0.366	1.0885e-21	Downregulated	HT vs HW	Endothelial cells
Tmem50a	4.42224e-26	-0.7238	0.03	0.261	1.08884e-21	Downregulated	HT vs HW	Endothelial cells
Itga9	5.05806e-26	-0.910109	0.161	0.597	1.24539e-21	Downregulated	HT vs HW	Endothelial cells
Tsc22d3	5.566e-26	-0.719799	0.026	0.246	1.37046e-21	Downregulated	HT vs HW	Endothelial cells
Atp2a3	5.77533e-26	-1.30103	0.143	0.53	1.422e-21	Downregulated	HT vs HW	Endothelial cells
Abhd5	6.73627e-26	-0.552487	0.001	0.119	1.65861e-21	Downregulated	HT vs HW	Endothelial cells
Tmed9	7.24824e-26	-0.772577	0.045	0.306	1.78466e-21	Downregulated	HT vs HW	Endothelial cells
Tmem59	7.48872e-26	-0.767428	0.052	0.328	1.84387e-21	Downregulated	HT vs HW	Endothelial cells
Specc1	7.84958e-26	-1.18308	0.16	0.575	1.93272e-21	Downregulated	HT vs HW	Endothelial cells
Fmr1	8.99918e-26	-0.644357	0.014	0.194	2.21578e-21	Downregulated	HT vs HW	Endothelial cells
2810474O19Rik	1.16125e-25	-0.548585	0.028	0.254	2.85923e-21	Downregulated	HT vs HW	Endothelial cells
Cd9	1.84865e-25	-1.01514	0.122	0.5	4.55174e-21	Downregulated	HT vs HW	Endothelial cells
Mpp7	2.24032e-25	-0.669853	0.023	0.231	5.51611e-21	Downregulated	HT vs HW	Endothelial cells
Gltp	2.30438e-25	-0.452359	0.011	0.179	5.67384e-21	Downregulated	HT vs HW	Endothelial cells
Rpl32	2.42366e-25	-0.802947	0.013	0.187	5.96755e-21	Downregulated	HT vs HW	Endothelial cells
Pla2g16	2.73688e-25	-0.691221	0.007	0.157	6.73876e-21	Downregulated	HT vs HW	Endothelial cells
Reep5	2.82895e-25	-0.529071	0.007	0.157	6.96543e-21	Downregulated	HT vs HW	Endothelial cells
Hgsnat	2.86031e-25	-0.442575	0.007	0.157	7.04266e-21	Downregulated	HT vs HW	Endothelial cells
Ltbp3	3.91594e-25	-0.577182	0.013	0.187	9.64183e-21	Downregulated	HT vs HW	Endothelial cells
Lmna	5.93943e-25	-0.689519	0.046	0.306	1.46241e-20	Downregulated	HT vs HW	Endothelial cells
Ly6e	6.1883e-25	-1.14092	0.223	0.672	1.52368e-20	Downregulated	HT vs HW	Endothelial cells
Calu	6.74795e-25	-0.719962	0.068	0.373	1.66148e-20	Downregulated	HT vs HW	Endothelial cells
Nln	6.96426e-25	-0.513171	0.01	0.172	1.71474e-20	Downregulated	HT vs HW	Endothelial cells
Apmap	7.18418e-25	-0.482225	0.006	0.149	1.76889e-20	Downregulated	HT vs HW	Endothelial cells
Ccnd2	7.35069e-25	-0.937329	0.091	0.425	1.80989e-20	Downregulated	HT vs HW	Endothelial cells
Zeb2	8.46053e-25	-1.16512	0.053	0.321	2.08315e-20	Downregulated	HT vs HW	Endothelial cells
Tmed7	8.65472e-25	-0.575382	0.02	0.216	2.13097e-20	Downregulated	HT vs HW	Endothelial cells
Synpo	9.65678e-25	-0.861798	0.209	0.672	2.37769e-20	Downregulated	HT vs HW	Endothelial cells
Tuba1a	1.00165e-24	-0.681549	0.005	0.142	2.46626e-20	Downregulated	HT vs HW	Endothelial cells
Clptm1l	1.37505e-24	-0.408487	0.005	0.142	3.38565e-20	Downregulated	HT vs HW	Endothelial cells
Arrb1	1.42163e-24	-0.865499	0.138	0.53	3.50033e-20	Downregulated	HT vs HW	Endothelial cells
Cox8a	1.44102e-24	-0.536825	0.005	0.142	3.54808e-20	Downregulated	HT vs HW	Endothelial cells
Gja4	1.58567e-24	-0.77518	0.04	0.284	3.90425e-20	Downregulated	HT vs HW	Endothelial cells
Gucy1a3	1.70869e-24	-0.94932	0.031	0.254	4.20713e-20	Downregulated	HT vs HW	Endothelial cells
Jund	2.09824e-24	-0.574441	0.034	0.269	5.16628e-20	Downregulated	HT vs HW	Endothelial cells
Ginm1	2.17461e-24	-0.501981	0.004	0.134	5.35431e-20	Downregulated	HT vs HW	Endothelial cells
Ywhag	2.17557e-24	-0.731462	0.029	0.246	5.35668e-20	Downregulated	HT vs HW	Endothelial cells
Rhob	2.43618e-24	-1.02862	0.097	0.433	5.99835e-20	Downregulated	HT vs HW	Endothelial cells
Eef2	2.49773e-24	-0.885863	0.044	0.291	6.1499e-20	Downregulated	HT vs HW	Endothelial cells
Lipa	3.09316e-24	-0.623484	0.003	0.127	7.61598e-20	Downregulated	HT vs HW	Endothelial cells
Ftl1	3.41135e-24	-0.751719	0.014	0.187	8.39943e-20	Downregulated	HT vs HW	Endothelial cells
Ndufa3	3.83877e-24	-0.40098	0.003	0.127	9.45181e-20	Downregulated	HT vs HW	Endothelial cells
Klf12	5.36738e-24	-1.0419	0.194	0.619	1.32156e-19	Downregulated	HT vs HW	Endothelial cells
Uqcrh	7.15616e-24	-0.726208	0.018	0.201	1.76199e-19	Downregulated	HT vs HW	Endothelial cells
Slc25a4	9.22335e-24	-0.965979	0.013	0.179	2.27097e-19	Downregulated	HT vs HW	Endothelial cells
Itm2c	9.38126e-24	-0.708691	0.022	0.216	2.30985e-19	Downregulated	HT vs HW	Endothelial cells
Emp2	1.01011e-23	-0.905947	0.07	0.366	2.4871e-19	Downregulated	HT vs HW	Endothelial cells
Tubb5	1.03249e-23	-0.885184	0.022	0.216	2.54219e-19	Downregulated	HT vs HW	Endothelial cells
Cpt1a	1.34904e-23	-0.621603	0.032	0.254	3.32162e-19	Downregulated	HT vs HW	Endothelial cells
S100a16	1.35862e-23	-0.706153	0.045	0.291	3.34519e-19	Downregulated	HT vs HW	Endothelial cells
Fblim1	1.54264e-23	-0.939229	0.093	0.418	3.7983e-19	Downregulated	HT vs HW	Endothelial cells
Ldha	2.05447e-23	-0.61498	0.006	0.142	5.05852e-19	Downregulated	HT vs HW	Endothelial cells
Emc3	2.09661e-23	-0.601543	0.028	0.239	5.16228e-19	Downregulated	HT vs HW	Endothelial cells
Fam107a	2.11055e-23	-0.710545	0.043	0.284	5.19659e-19	Downregulated	HT vs HW	Endothelial cells
Cox6b1	2.29768e-23	-0.537778	0.006	0.142	5.65734e-19	Downregulated	HT vs HW	Endothelial cells
Ndufb9	2.29768e-23	-0.577866	0.006	0.142	5.65734e-19	Downregulated	HT vs HW	Endothelial cells
Thbd	2.72296e-23	-0.934337	0.074	0.373	6.70446e-19	Downregulated	HT vs HW	Endothelial cells
Rrbp1	3.30978e-23	-0.925349	0.188	0.619	8.14935e-19	Downregulated	HT vs HW	Endothelial cells
Pgrmc2	3.59627e-23	-0.665562	0.014	0.179	8.85473e-19	Downregulated	HT vs HW	Endothelial cells
Tpp1	4.47577e-23	-0.441173	0.005	0.134	1.10202e-18	Downregulated	HT vs HW	Endothelial cells
Itpripl2	4.82149e-23	-0.653871	0.035	0.261	1.18715e-18	Downregulated	HT vs HW	Endothelial cells
Me1	5.11615e-23	-0.439447	0.012	0.172	1.2597e-18	Downregulated	HT vs HW	Endothelial cells
2610203C20Rik	5.47174e-23	-0.981121	0.157	0.552	1.34725e-18	Downregulated	HT vs HW	Endothelial cells
Rbm28	5.63635e-23	-0.794658	0.044	0.284	1.38778e-18	Downregulated	HT vs HW	Endothelial cells
Arsj	5.7714e-23	-0.450139	0.005	0.134	1.42104e-18	Downregulated	HT vs HW	Endothelial cells
Ly6c1	6.20189e-23	-1.07283	0.142	0.515	1.52703e-18	Downregulated	HT vs HW	Endothelial cells
Tspan5	6.2623e-23	-0.78071	0.228	0.701	1.5419e-18	Downregulated	HT vs HW	Endothelial cells
Dap	6.83835e-23	-0.74061	0.049	0.299	1.68374e-18	Downregulated	HT vs HW	Endothelial cells
Rps3	7.07897e-23	-0.840974	0.03	0.239	1.74298e-18	Downregulated	HT vs HW	Endothelial cells
Calr	7.6088e-23	-0.533631	0.004	0.127	1.87344e-18	Downregulated	HT vs HW	Endothelial cells
Mfap5	7.6654e-23	-0.676823	0.031	0.246	1.88738e-18	Downregulated	HT vs HW	Endothelial cells
Ctsb	7.78149e-23	-0.546803	0	0.097	1.91596e-18	Downregulated	HT vs HW	Endothelial cells
Degs1	7.78149e-23	-0.382139	0	0.097	1.91596e-18	Downregulated	HT vs HW	Endothelial cells
Ace	8.13577e-23	-0.81454	0.128	0.5	2.00319e-18	Downregulated	HT vs HW	Endothelial cells
Emc7	9.33343e-23	-0.491309	0.014	0.179	2.29808e-18	Downregulated	HT vs HW	Endothelial cells
Scn1b	1.04784e-22	-0.612374	0.029	0.239	2.57999e-18	Downregulated	HT vs HW	Endothelial cells
Pank3	1.21835e-22	-0.615904	0.008	0.149	2.99981e-18	Downregulated	HT vs HW	Endothelial cells
Dram1	1.23751e-22	-0.566473	0.008	0.149	3.04699e-18	Downregulated	HT vs HW	Endothelial cells
Azin1	1.49538e-22	-0.773235	0.157	0.552	3.68193e-18	Downregulated	HT vs HW	Endothelial cells
Serpine1	1.51636e-22	-0.658364	0.001	0.104	3.73358e-18	Downregulated	HT vs HW	Endothelial cells
Hp	1.58949e-22	-1.39241	0.002	0.112	3.91365e-18	Downregulated	HT vs HW	Endothelial cells
Atp5k	1.61589e-22	-0.499142	0.003	0.119	3.97864e-18	Downregulated	HT vs HW	Endothelial cells
Prkg1	1.67116e-22	-1.13671	0.21	0.642	4.11473e-18	Downregulated	HT vs HW	Endothelial cells
Pip5k1b	1.74546e-22	-0.792073	0.044	0.284	4.29768e-18	Downregulated	HT vs HW	Endothelial cells
Phlda3	1.87561e-22	-0.315639	0.002	0.112	4.61814e-18	Downregulated	HT vs HW	Endothelial cells
Ablim1	2.13492e-22	1.11892	0.938	0.955	5.25659e-18	Upregulated	HT vs HW	Endothelial cells
Ptchd1	2.29586e-22	-1.17661	0.049	0.291	5.65286e-18	Downregulated	HT vs HW	Endothelial cells
Impad1	2.71145e-22	-0.764587	0.035	0.254	6.67613e-18	Downregulated	HT vs HW	Endothelial cells
Ehbp1l1	2.80666e-22	-0.732847	0.045	0.284	6.91056e-18	Downregulated	HT vs HW	Endothelial cells
Rpl8	2.93009e-22	-0.98034	0.047	0.284	7.21446e-18	Downregulated	HT vs HW	Endothelial cells
Cgnl1	3.30735e-22	-0.858196	0.168	0.567	8.14336e-18	Downregulated	HT vs HW	Endothelial cells
Tulp4	3.607e-22	-1.2619	0.277	0.701	8.88116e-18	Downregulated	HT vs HW	Endothelial cells
Nrip1	4.93625e-22	-0.941644	0.102	0.425	1.2154e-17	Downregulated	HT vs HW	Endothelial cells
Snta1	5.13153e-22	-0.494122	0.01	0.157	1.26349e-17	Downregulated	HT vs HW	Endothelial cells
Myrip	5.66068e-22	-0.871548	0.223	0.672	1.39377e-17	Downregulated	HT vs HW	Endothelial cells
Atp5b	6.43615e-22	-0.699321	0.017	0.187	1.58471e-17	Downregulated	HT vs HW	Endothelial cells
Ntn1	6.95912e-22	-1.0332	0.171	0.56	1.71347e-17	Downregulated	HT vs HW	Endothelial cells
Slc9a3r2	7.15476e-22	-0.738859	0.11	0.455	1.76165e-17	Downregulated	HT vs HW	Endothelial cells
Jag1	7.22184e-22	-1.21219	0.175	0.56	1.77816e-17	Downregulated	HT vs HW	Endothelial cells
Txlng	8.352e-22	-0.518566	0.045	0.284	2.05643e-17	Downregulated	HT vs HW	Endothelial cells
Fam20c	9.04236e-22	-0.440169	0.006	0.134	2.22641e-17	Downregulated	HT vs HW	Endothelial cells
Trerf1	9.20633e-22	-1.08004	0.132	0.485	2.26678e-17	Downregulated	HT vs HW	Endothelial cells
Ptgis	9.28422e-22	-0.832373	0.036	0.254	2.28596e-17	Downregulated	HT vs HW	Endothelial cells
Atp5e	9.4406e-22	-0.80152	0.014	0.172	2.32446e-17	Downregulated	HT vs HW	Endothelial cells
Acox1	9.99586e-22	-0.627519	0.017	0.187	2.46118e-17	Downregulated	HT vs HW	Endothelial cells
Aplp2	1.05971e-21	-0.847109	0.259	0.724	2.60922e-17	Downregulated	HT vs HW	Endothelial cells
Sh3bgrl3	1.14434e-21	-0.48206	0.012	0.164	2.81759e-17	Downregulated	HT vs HW	Endothelial cells
Pepd	1.1595e-21	-0.584263	0.025	0.216	2.85492e-17	Downregulated	HT vs HW	Endothelial cells
Atp6v0e	1.31726e-21	-0.58163	0.014	0.172	3.24336e-17	Downregulated	HT vs HW	Endothelial cells
Il13ra1	1.38837e-21	-0.609922	0.029	0.231	3.41845e-17	Downregulated	HT vs HW	Endothelial cells
Psmb4	1.43255e-21	-0.544135	0.009	0.149	3.52721e-17	Downregulated	HT vs HW	Endothelial cells
Capza2	1.65375e-21	-0.714231	0.068	0.343	4.07186e-17	Downregulated	HT vs HW	Endothelial cells
1810058I24Rik	1.70331e-21	-0.520156	0.005	0.127	4.1939e-17	Downregulated	HT vs HW	Endothelial cells
Lpgat1	2.12199e-21	-1.07339	0.016	0.179	5.22477e-17	Downregulated	HT vs HW	Endothelial cells
Nfix	2.3973e-21	-0.766175	0.183	0.604	5.90264e-17	Downregulated	HT vs HW	Endothelial cells
Mir99ahg	2.4176e-21	-0.747311	0.063	0.328	5.95263e-17	Downregulated	HT vs HW	Endothelial cells
Rpl41	2.43703e-21	-0.640799	0.024	0.209	6.00045e-17	Downregulated	HT vs HW	Endothelial cells
Fth1	2.80183e-21	-1.21619	0.04	0.254	6.89867e-17	Downregulated	HT vs HW	Endothelial cells
Ormdl3	3.39491e-21	-0.612507	0.004	0.119	8.35894e-17	Downregulated	HT vs HW	Endothelial cells
Irf6	3.57309e-21	-0.5118	0.016	0.179	8.79767e-17	Downregulated	HT vs HW	Endothelial cells
Hdac9	3.82316e-21	-0.900476	0.07	0.343	9.41338e-17	Downregulated	HT vs HW	Endothelial cells
H3f3b	3.91393e-21	-0.689745	0.055	0.306	9.63689e-17	Downregulated	HT vs HW	Endothelial cells
Scara3	4.18111e-21	-0.562931	0.028	0.224	1.02947e-16	Downregulated	HT vs HW	Endothelial cells
Sec61a1	4.29577e-21	-0.632658	0.024	0.209	1.0577e-16	Downregulated	HT vs HW	Endothelial cells
Smad3	4.9295e-21	-0.762377	0.128	0.485	1.21374e-16	Downregulated	HT vs HW	Endothelial cells
Atp5j2	6.33351e-21	-0.491664	0.013	0.164	1.55944e-16	Downregulated	HT vs HW	Endothelial cells
Ctsl	6.72698e-21	-0.588162	0.001	0.097	1.65632e-16	Downregulated	HT vs HW	Endothelial cells
Hexa	7.6038e-21	-0.506216	0.007	0.134	1.87221e-16	Downregulated	HT vs HW	Endothelial cells
Tmbim1	7.68787e-21	-0.729879	0.056	0.306	1.89291e-16	Downregulated	HT vs HW	Endothelial cells
Myl12a	9.13564e-21	-0.690269	0.064	0.328	2.24938e-16	Downregulated	HT vs HW	Endothelial cells
Synpo2	9.55334e-21	-0.492823	0.013	0.164	2.35222e-16	Downregulated	HT vs HW	Endothelial cells
Napepld	9.58277e-21	-0.542113	0.007	0.134	2.35947e-16	Downregulated	HT vs HW	Endothelial cells
Vwf	9.75014e-21	-0.749018	0.214	0.649	2.40068e-16	Downregulated	HT vs HW	Endothelial cells
Afap1l2	1.12039e-20	-0.869727	0.174	0.56	2.75864e-16	Downregulated	HT vs HW	Endothelial cells
Cd164	1.20696e-20	-0.510554	0.007	0.134	2.97179e-16	Downregulated	HT vs HW	Endothelial cells
Nos3	1.28166e-20	-0.897299	0.232	0.657	3.1557e-16	Downregulated	HT vs HW	Endothelial cells
Ltbp4	1.36504e-20	-1.25883	0.368	0.761	3.36101e-16	Downregulated	HT vs HW	Endothelial cells
H13	1.37899e-20	-0.653699	0.042	0.261	3.39535e-16	Downregulated	HT vs HW	Endothelial cells
Atp5f1	1.51858e-20	-0.647164	0.025	0.209	3.73905e-16	Downregulated	HT vs HW	Endothelial cells
Rplp2	1.60413e-20	-0.616798	0.023	0.201	3.94968e-16	Downregulated	HT vs HW	Endothelial cells
Tmem176b	1.66395e-20	-0.641268	0.019	0.187	4.09697e-16	Downregulated	HT vs HW	Endothelial cells
Meg3	1.76313e-20	-0.747216	0.027	0.216	4.34118e-16	Downregulated	HT vs HW	Endothelial cells
B4galt1	1.91164e-20	-0.609223	0.143	0.515	4.70684e-16	Downregulated	HT vs HW	Endothelial cells
Prkcsh	1.92624e-20	-0.452011	0.012	0.157	4.74278e-16	Downregulated	HT vs HW	Endothelial cells
Cpeb2	2.02857e-20	-0.514645	0.019	0.187	4.99475e-16	Downregulated	HT vs HW	Endothelial cells
Pparg	2.03739e-20	2.26918	0.636	0.269	5.01646e-16	Upregulated	HT vs HW	Endothelial cells
Vegfc	2.06331e-20	-0.980066	0.233	0.657	5.08027e-16	Downregulated	HT vs HW	Endothelial cells
Sox18	2.59622e-20	-0.755769	0.048	0.276	6.39241e-16	Downregulated	HT vs HW	Endothelial cells
She	2.658e-20	-0.676739	0.164	0.56	6.54453e-16	Downregulated	HT vs HW	Endothelial cells
Clta	2.84822e-20	-0.711819	0.04	0.254	7.01288e-16	Downregulated	HT vs HW	Endothelial cells
Lrg1	3.47827e-20	-0.750714	0.021	0.194	8.5642e-16	Downregulated	HT vs HW	Endothelial cells
Ptprr	3.71383e-20	-0.600457	0.055	0.299	9.14418e-16	Downregulated	HT vs HW	Endothelial cells
Rpl22	4.11911e-20	-0.646975	0.026	0.209	1.01421e-15	Downregulated	HT vs HW	Endothelial cells
Cp	4.26667e-20	-0.967904	0.157	0.515	1.05054e-15	Downregulated	HT vs HW	Endothelial cells
Mir22hg	5.26123e-20	-0.476676	0.014	0.164	1.29542e-15	Downregulated	HT vs HW	Endothelial cells
Prnp	5.32741e-20	-0.446145	0.009	0.142	1.31171e-15	Downregulated	HT vs HW	Endothelial cells
Tsc22d1	5.36081e-20	-0.973339	0.288	0.731	1.31994e-15	Downregulated	HT vs HW	Endothelial cells
Itgb4	5.39063e-20	-0.636124	0.11	0.44	1.32728e-15	Downregulated	HT vs HW	Endothelial cells
Zfp697	5.53828e-20	-0.723348	0.018	0.179	1.36364e-15	Downregulated	HT vs HW	Endothelial cells
S100a11	5.74389e-20	-0.517553	0.011	0.149	1.41426e-15	Downregulated	HT vs HW	Endothelial cells
Hnrnpa0	6.87415e-20	-0.57183	0.024	0.201	1.69255e-15	Downregulated	HT vs HW	Endothelial cells
Gata6	7.19103e-20	-0.699125	0.054	0.291	1.77057e-15	Downregulated	HT vs HW	Endothelial cells
Ankrd33b	7.47568e-20	-0.809612	0.062	0.313	1.84066e-15	Downregulated	HT vs HW	Endothelial cells
Colgalt1	7.50559e-20	-0.591641	0.02	0.187	1.84803e-15	Downregulated	HT vs HW	Endothelial cells
Nhsl1	8.57635e-20	-0.882755	0.163	0.53	2.11167e-15	Downregulated	HT vs HW	Endothelial cells
Psma1	8.58971e-20	-0.509519	0.02	0.187	2.11496e-15	Downregulated	HT vs HW	Endothelial cells
Ablim3	9.05705e-20	2.01523	0.653	0.269	2.23003e-15	Upregulated	HT vs HW	Endothelial cells
Laptm4a	9.27842e-20	-0.73987	0.105	0.418	2.28453e-15	Downregulated	HT vs HW	Endothelial cells
Mcur1	9.87499e-20	-0.456808	0.018	0.179	2.43142e-15	Downregulated	HT vs HW	Endothelial cells
Anxa5	1.2858e-19	-0.790317	0.055	0.291	3.1659e-15	Downregulated	HT vs HW	Endothelial cells
Sema3g	1.41499e-19	-0.912462	0.246	0.672	3.48399e-15	Downregulated	HT vs HW	Endothelial cells
Pkn3	1.44532e-19	-0.58406	0.126	0.47	3.55866e-15	Downregulated	HT vs HW	Endothelial cells
Mgst3	1.45594e-19	-0.338973	0.004	0.112	3.58481e-15	Downregulated	HT vs HW	Endothelial cells
Ddrgk1	1.54841e-19	-0.467216	0.013	0.157	3.81249e-15	Downregulated	HT vs HW	Endothelial cells
Spcs1	1.55642e-19	-0.288557	0	0.082	3.83222e-15	Downregulated	HT vs HW	Endothelial cells
Ranbp17	1.58098e-19	-0.688448	0.029	0.216	3.89268e-15	Downregulated	HT vs HW	Endothelial cells
Vegfd	1.7049e-19	-0.539719	0.013	0.157	4.19781e-15	Downregulated	HT vs HW	Endothelial cells
Tm4sf1	1.70538e-19	-0.948119	0.245	0.672	4.19898e-15	Downregulated	HT vs HW	Endothelial cells
Magi2	1.76693e-19	-1.03047	0.056	0.291	4.35053e-15	Downregulated	HT vs HW	Endothelial cells
Rps6ka3	1.76801e-19	-0.803838	0.188	0.575	4.35318e-15	Downregulated	HT vs HW	Endothelial cells
Ssfa2	1.78662e-19	-0.83143	0.191	0.582	4.39901e-15	Downregulated	HT vs HW	Endothelial cells
Fam234a	1.80685e-19	-0.543707	0.039	0.246	4.44883e-15	Downregulated	HT vs HW	Endothelial cells
Cyb5a	1.89099e-19	-0.691807	0.047	0.269	4.656e-15	Downregulated	HT vs HW	Endothelial cells
Osbpl3	2.03254e-19	-0.51915	0.031	0.224	5.00452e-15	Downregulated	HT vs HW	Endothelial cells
4933406I18Rik	2.10264e-19	-0.546131	0.013	0.157	5.17713e-15	Downregulated	HT vs HW	Endothelial cells
Ndufb3	2.14849e-19	-0.382931	0.003	0.104	5.29e-15	Downregulated	HT vs HW	Endothelial cells
Cpq	2.17317e-19	-0.739656	0.07	0.328	5.35078e-15	Downregulated	HT vs HW	Endothelial cells
Pla2g4a	2.22264e-19	-0.673856	0.015	0.164	5.47259e-15	Downregulated	HT vs HW	Endothelial cells
E430024P14Rik	2.22885e-19	-0.400511	0.003	0.104	5.48788e-15	Downregulated	HT vs HW	Endothelial cells
Spcs3	2.31334e-19	-0.515982	0.01	0.142	5.6959e-15	Downregulated	HT vs HW	Endothelial cells
Gpr108	2.34064e-19	-0.308033	0.003	0.104	5.76313e-15	Downregulated	HT vs HW	Endothelial cells
Col8a1	2.38913e-19	-1.62194	0.187	0.53	5.88252e-15	Downregulated	HT vs HW	Endothelial cells
Fbln2	2.48705e-19	-0.92119	0.277	0.716	6.12361e-15	Downregulated	HT vs HW	Endothelial cells
Atp5j	2.63826e-19	-0.629297	0.015	0.164	6.49591e-15	Downregulated	HT vs HW	Endothelial cells
Selenos	2.68815e-19	-0.326081	0.001	0.09	6.61876e-15	Downregulated	HT vs HW	Endothelial cells
Syngr2	2.88209e-19	-0.247438	0.001	0.09	7.09629e-15	Stable	HT vs HW	Endothelial cells
Rps15	2.95227e-19	-0.533036	0.029	0.216	7.26909e-15	Downregulated	HT vs HW	Endothelial cells
St13	3.48278e-19	-0.662408	0.072	0.336	8.57529e-15	Downregulated	HT vs HW	Endothelial cells
Iqgap1	3.55191e-19	-0.910871	0.369	0.821	8.7455e-15	Downregulated	HT vs HW	Endothelial cells
Stmn2	3.73141e-19	-0.945024	0.098	0.388	9.18747e-15	Downregulated	HT vs HW	Endothelial cells
Rpl38	3.75395e-19	-0.82001	0.024	0.194	9.24297e-15	Downregulated	HT vs HW	Endothelial cells
Bhlhe40	4.24601e-19	-0.486631	0.019	0.179	1.04545e-14	Downregulated	HT vs HW	Endothelial cells
H2-D1	4.3379e-19	-0.981322	0.203	0.575	1.06808e-14	Downregulated	HT vs HW	Endothelial cells
Dbi	4.54827e-19	-1.1122	0.012	0.149	1.11987e-14	Downregulated	HT vs HW	Endothelial cells
Cpeb4	5.26745e-19	-0.579105	0.061	0.306	1.29695e-14	Downregulated	HT vs HW	Endothelial cells
Nucb1	6.22851e-19	-0.546882	0.03	0.216	1.53358e-14	Downregulated	HT vs HW	Endothelial cells
Decr1	6.9237e-19	-0.526962	0.009	0.134	1.70475e-14	Downregulated	HT vs HW	Endothelial cells
Cox7a2	7.38354e-19	-0.542756	0.014	0.157	1.81797e-14	Downregulated	HT vs HW	Endothelial cells
Slc8a1	7.78996e-19	-0.667616	0.162	0.522	1.91804e-14	Downregulated	HT vs HW	Endothelial cells
Ehd1	7.93118e-19	-0.696997	0.049	0.269	1.95281e-14	Downregulated	HT vs HW	Endothelial cells
Cd47	7.93234e-19	-0.711442	0.208	0.627	1.9531e-14	Downregulated	HT vs HW	Endothelial cells
Atp6v0b	8.00029e-19	-0.600694	0.048	0.269	1.96983e-14	Downregulated	HT vs HW	Endothelial cells
Pthlh	8.20826e-19	-0.606355	0.006	0.119	2.02104e-14	Downregulated	HT vs HW	Endothelial cells
Unc50	8.65546e-19	-0.509463	0.006	0.119	2.13115e-14	Downregulated	HT vs HW	Endothelial cells
Sparc	1.08851e-18	-1.33404	0.157	0.485	2.68013e-14	Downregulated	HT vs HW	Endothelial cells
Setbp1	1.10271e-18	-0.967614	0.179	0.537	2.7151e-14	Downregulated	HT vs HW	Endothelial cells
Kdelr1	1.18041e-18	-0.573511	0.022	0.187	2.90642e-14	Downregulated	HT vs HW	Endothelial cells
Tgm2	1.50584e-18	-0.704694	0.162	0.522	3.70768e-14	Downregulated	HT vs HW	Endothelial cells
Ifitm3	1.62507e-18	-0.892864	0.048	0.261	4.00124e-14	Downregulated	HT vs HW	Endothelial cells
Soat1	1.78412e-18	-0.42277	0.005	0.112	4.39287e-14	Downregulated	HT vs HW	Endothelial cells
Dhh	1.80423e-18	-0.52413	0.02	0.179	4.44237e-14	Downregulated	HT vs HW	Endothelial cells
Mcam	2.01204e-18	-0.757606	0.065	0.306	4.95405e-14	Downregulated	HT vs HW	Endothelial cells
Kcnn3	2.0702e-18	-0.717802	0.027	0.201	5.09725e-14	Downregulated	HT vs HW	Endothelial cells
Pvt1	2.27011e-18	-0.785322	0.067	0.313	5.58946e-14	Downregulated	HT vs HW	Endothelial cells
Zbtb7c	2.43752e-18	-0.705152	0.053	0.276	6.00166e-14	Downregulated	HT vs HW	Endothelial cells
Atp2a2	2.50507e-18	-0.737584	0.131	0.463	6.16799e-14	Downregulated	HT vs HW	Endothelial cells
Calm1	2.6285e-18	-0.998327	0.17	0.515	6.47189e-14	Downregulated	HT vs HW	Endothelial cells
Swi5	2.71545e-18	-0.346655	0.016	0.164	6.68597e-14	Downregulated	HT vs HW	Endothelial cells
Hexb	2.99044e-18	-0.560484	0.013	0.149	7.36307e-14	Downregulated	HT vs HW	Endothelial cells
Sulf1	3.05357e-18	-0.802154	0.307	0.716	7.51849e-14	Downregulated	HT vs HW	Endothelial cells
Hint1	3.42948e-18	-0.480994	0.013	0.149	8.44407e-14	Downregulated	HT vs HW	Endothelial cells
Tex261	3.48866e-18	-0.496323	0.013	0.149	8.58978e-14	Downregulated	HT vs HW	Endothelial cells
Bmpr2	3.49283e-18	-0.812614	0.391	0.843	8.60004e-14	Downregulated	HT vs HW	Endothelial cells
Pcyox1	3.51861e-18	-0.494147	0.013	0.149	8.66352e-14	Downregulated	HT vs HW	Endothelial cells
Nfic	3.54707e-18	-0.570621	0.112	0.425	8.73359e-14	Downregulated	HT vs HW	Endothelial cells
Sem1	4.4842e-18	-0.645078	0.067	0.313	1.1041e-13	Downregulated	HT vs HW	Endothelial cells
Shroom4	4.78779e-18	-0.877559	0.327	0.761	1.17885e-13	Downregulated	HT vs HW	Endothelial cells
Cd34	4.81091e-18	-0.5314	0.169	0.552	1.18454e-13	Downregulated	HT vs HW	Endothelial cells
Hdgf	5.02782e-18	-0.519197	0.025	0.194	1.23795e-13	Downregulated	HT vs HW	Endothelial cells
Capg	5.09936e-18	-0.330688	0.004	0.104	1.25556e-13	Downregulated	HT vs HW	Endothelial cells
M6pr	5.21539e-18	-0.571597	0.01	0.134	1.28413e-13	Downregulated	HT vs HW	Endothelial cells
Rnf11	5.60673e-18	-0.632663	0.037	0.231	1.38049e-13	Downregulated	HT vs HW	Endothelial cells
Ptpn14	5.81012e-18	-0.703656	0.295	0.739	1.43057e-13	Downregulated	HT vs HW	Endothelial cells
Kdelr2	6.15279e-18	-0.42501	0.015	0.157	1.51494e-13	Downregulated	HT vs HW	Endothelial cells
Ptp4a1	6.93012e-18	-0.348884	0	0.075	1.70633e-13	Downregulated	HT vs HW	Endothelial cells
Slc48a1	6.93012e-18	-0.295216	0	0.075	1.70633e-13	Downregulated	HT vs HW	Endothelial cells
Tnfrsf12a	6.93012e-18	-0.304654	0	0.075	1.70633e-13	Downregulated	HT vs HW	Endothelial cells
Fgfr1	7.33813e-18	-0.552649	0.065	0.306	1.80679e-13	Downregulated	HT vs HW	Endothelial cells
Ndufc2	7.60318e-18	-0.462709	0.01	0.134	1.87205e-13	Downregulated	HT vs HW	Endothelial cells
2510039O18Rik	7.60841e-18	-0.45643	0.023	0.187	1.87334e-13	Downregulated	HT vs HW	Endothelial cells
Gpx1	8.05462e-18	-0.37699	0.003	0.097	1.98321e-13	Downregulated	HT vs HW	Endothelial cells
Chsy1	8.06828e-18	-0.584503	0.048	0.261	1.98657e-13	Downregulated	HT vs HW	Endothelial cells
Tagln2	8.53259e-18	-0.82359	0.064	0.299	2.1009e-13	Downregulated	HT vs HW	Endothelial cells
Cops9	8.76363e-18	-0.4179	0.003	0.097	2.15778e-13	Downregulated	HT vs HW	Endothelial cells
Fkbp7	8.9696e-18	-0.342682	0.007	0.119	2.20849e-13	Downregulated	HT vs HW	Endothelial cells
Slc7a6	9.19607e-18	-0.304314	0.003	0.097	2.26426e-13	Downregulated	HT vs HW	Endothelial cells
Smdt1	9.20904e-18	-0.575316	0.012	0.142	2.26745e-13	Downregulated	HT vs HW	Endothelial cells
Rpl14	9.28956e-18	-0.670002	0.012	0.142	2.28728e-13	Downregulated	HT vs HW	Endothelial cells
Plbd2	1.15382e-17	-0.295567	0.002	0.09	2.84093e-13	Downregulated	HT vs HW	Endothelial cells
Tmem147	1.26076e-17	-0.230409	0.001	0.082	3.10424e-13	Stable	HT vs HW	Endothelial cells
Tpm1	1.27763e-17	-1.35308	0.081	0.343	3.14577e-13	Downregulated	HT vs HW	Endothelial cells
Atp6v1a	1.29096e-17	-0.649295	0.039	0.231	3.1786e-13	Downregulated	HT vs HW	Endothelial cells
Gcnt1	1.36246e-17	-0.654564	0.055	0.276	3.35465e-13	Downregulated	HT vs HW	Endothelial cells
Mrpl33	1.47792e-17	-0.506866	0.012	0.142	3.63893e-13	Downregulated	HT vs HW	Endothelial cells
Txndc15	1.48613e-17	-0.616511	0.014	0.149	3.65915e-13	Downregulated	HT vs HW	Endothelial cells
Arhgdia	1.66615e-17	-0.517397	0.044	0.246	4.10239e-13	Downregulated	HT vs HW	Endothelial cells
Eif3l	1.6823e-17	-0.513697	0.014	0.149	4.14217e-13	Downregulated	HT vs HW	Endothelial cells
Megf6	1.84321e-17	-0.591963	0.072	0.321	4.53835e-13	Downregulated	HT vs HW	Endothelial cells
Impact	2.00238e-17	-0.518308	0.02	0.172	4.93027e-13	Downregulated	HT vs HW	Endothelial cells
Abhd12	2.04104e-17	-0.56974	0.009	0.127	5.02545e-13	Downregulated	HT vs HW	Endothelial cells
Bmp4	2.06955e-17	-0.752569	0.04	0.231	5.09564e-13	Downregulated	HT vs HW	Endothelial cells
Anpep	2.58458e-17	-0.483259	0.006	0.112	6.36374e-13	Downregulated	HT vs HW	Endothelial cells
Syt11	2.59371e-17	-0.353407	0.024	0.187	6.38623e-13	Downregulated	HT vs HW	Endothelial cells
Olfm1	2.80841e-17	-0.326474	0.006	0.112	6.91487e-13	Downregulated	HT vs HW	Endothelial cells
Gm42418	2.96445e-17	-1.57634	0.567	0.799	7.29907e-13	Downregulated	HT vs HW	Endothelial cells
Pde7a	3.32446e-17	-0.448508	0.022	0.179	8.18549e-13	Downregulated	HT vs HW	Endothelial cells
Csf1	3.48409e-17	-0.620998	0.029	0.201	8.57852e-13	Downregulated	HT vs HW	Endothelial cells
Trpv4	3.77362e-17	-0.373107	0.104	0.403	9.29141e-13	Downregulated	HT vs HW	Endothelial cells
Ybx3	3.93842e-17	-0.638835	0.078	0.328	9.69718e-13	Downregulated	HT vs HW	Endothelial cells
Camk1d	4.53044e-17	-0.225739	0.11	0.403	1.11548e-12	Stable	HT vs HW	Endothelial cells
Gkn3	5.51415e-17	-0.882339	0.035	0.216	1.35769e-12	Downregulated	HT vs HW	Endothelial cells
Cs	5.6627e-17	-0.670801	0.03	0.201	1.39427e-12	Downregulated	HT vs HW	Endothelial cells
Sox13	6.35067e-17	-0.864547	0.23	0.597	1.56366e-12	Downregulated	HT vs HW	Endothelial cells
Aco2	6.96726e-17	-0.499307	0.037	0.224	1.71548e-12	Downregulated	HT vs HW	Endothelial cells
Crip2	7.21411e-17	-0.668576	0.104	0.388	1.77626e-12	Downregulated	HT vs HW	Endothelial cells
Mxra8	7.56674e-17	-0.430227	0.021	0.172	1.86308e-12	Downregulated	HT vs HW	Endothelial cells
Vipr1	7.57509e-17	-0.533963	0.013	0.142	1.86514e-12	Downregulated	HT vs HW	Endothelial cells
Cd200	8.02401e-17	-0.744468	0.191	0.545	1.97567e-12	Downregulated	HT vs HW	Endothelial cells
Pon2	8.53678e-17	-0.559572	0.035	0.216	2.10193e-12	Downregulated	HT vs HW	Endothelial cells
Ldlr	8.54727e-17	-0.488926	0.013	0.142	2.10451e-12	Downregulated	HT vs HW	Endothelial cells
Dad1	8.55922e-17	-0.50583	0.019	0.164	2.10745e-12	Downregulated	HT vs HW	Endothelial cells
Pdlim7	8.59326e-17	-0.530229	0.116	0.418	2.11583e-12	Downregulated	HT vs HW	Endothelial cells
Itgb3	8.64217e-17	-0.455795	0.032	0.209	2.12787e-12	Downregulated	HT vs HW	Endothelial cells
Krtcap2	8.97838e-17	-0.400205	0.008	0.119	2.21066e-12	Downregulated	HT vs HW	Endothelial cells
Fam3c	9.04668e-17	-0.609816	0.066	0.299	2.22747e-12	Downregulated	HT vs HW	Endothelial cells
Icam1	9.15065e-17	-0.620397	0.063	0.291	2.25307e-12	Downregulated	HT vs HW	Endothelial cells
Comt	1.05285e-16	-0.446444	0.043	0.239	2.59234e-12	Downregulated	HT vs HW	Endothelial cells
Lman1	1.16841e-16	-0.669047	0.033	0.209	2.87686e-12	Downregulated	HT vs HW	Endothelial cells
Pigk	1.27962e-16	-0.464065	0.035	0.216	3.15068e-12	Downregulated	HT vs HW	Endothelial cells
Tnfaip2	1.30967e-16	-0.541456	0.03	0.201	3.22466e-12	Downregulated	HT vs HW	Endothelial cells
Itga5	1.31435e-16	-0.626536	0.182	0.545	3.2362e-12	Downregulated	HT vs HW	Endothelial cells
Fbln5	1.33812e-16	-0.923551	0.308	0.709	3.29472e-12	Downregulated	HT vs HW	Endothelial cells
Tinagl1	1.40814e-16	-0.58611	0.16	0.507	3.46711e-12	Downregulated	HT vs HW	Endothelial cells
Hsph1	1.61304e-16	-0.574123	0.024	0.179	3.97164e-12	Downregulated	HT vs HW	Endothelial cells
P4ha2	1.81004e-16	-0.525765	0.047	0.246	4.45669e-12	Downregulated	HT vs HW	Endothelial cells
Fgd4	1.83773e-16	-0.560703	0.055	0.269	4.52487e-12	Downregulated	HT vs HW	Endothelial cells
Nmt2	1.90421e-16	-0.668294	0.118	0.41	4.68856e-12	Downregulated	HT vs HW	Endothelial cells
Rfk	1.94416e-16	-0.481531	0.026	0.187	4.78691e-12	Downregulated	HT vs HW	Endothelial cells
Lima1	1.96289e-16	-0.680318	0.329	0.769	4.83302e-12	Downregulated	HT vs HW	Endothelial cells
Ctdsp2	2.04533e-16	-0.430705	0.123	0.433	5.03602e-12	Downregulated	HT vs HW	Endothelial cells
Ubc	2.13002e-16	-0.678249	0.022	0.172	5.24453e-12	Downregulated	HT vs HW	Endothelial cells
Glmp	2.14133e-16	-0.435038	0.007	0.112	5.27239e-12	Downregulated	HT vs HW	Endothelial cells
Eogt	2.21482e-16	-0.618518	0.15	0.485	5.45333e-12	Downregulated	HT vs HW	Endothelial cells
Hsd17b4	2.30056e-16	-0.42566	0.01	0.127	5.66444e-12	Downregulated	HT vs HW	Endothelial cells
Serpinh1	2.30056e-16	-0.544241	0.01	0.127	5.66444e-12	Downregulated	HT vs HW	Endothelial cells
Selenon	2.3621e-16	-0.497034	0.012	0.134	5.81597e-12	Downregulated	HT vs HW	Endothelial cells
Ifi27l2a	2.40242e-16	-0.860649	0.012	0.134	5.91525e-12	Downregulated	HT vs HW	Endothelial cells
Rhoq	2.5221e-16	-0.598428	0.036	0.216	6.20992e-12	Downregulated	HT vs HW	Endothelial cells
Cyth3	2.76847e-16	-0.802799	0.208	0.567	6.81652e-12	Downregulated	HT vs HW	Endothelial cells
Mrps6	2.77953e-16	-0.384974	0.007	0.112	6.84376e-12	Downregulated	HT vs HW	Endothelial cells
Slc4a8	2.86266e-16	-0.42429	0.007	0.112	7.04844e-12	Downregulated	HT vs HW	Endothelial cells
Cdc14a	2.86866e-16	-0.836496	0.137	0.44	7.0632e-12	Downregulated	HT vs HW	Endothelial cells
Lgals1	2.95224e-16	-0.546174	0.003	0.09	7.26901e-12	Downregulated	HT vs HW	Endothelial cells
Lgals3bp	2.95224e-16	-0.377254	0.003	0.09	7.26901e-12	Downregulated	HT vs HW	Endothelial cells
2010111I01Rik	3.02159e-16	-1.10189	0.412	0.799	7.43976e-12	Downregulated	HT vs HW	Endothelial cells
Cox6c	3.05545e-16	-0.539192	0.018	0.157	7.52313e-12	Downregulated	HT vs HW	Endothelial cells
Prdx5	3.07983e-16	-0.310351	0	0.067	7.58316e-12	Downregulated	HT vs HW	Endothelial cells
Serpinf1	3.07983e-16	-0.278769	0	0.067	7.58316e-12	Downregulated	HT vs HW	Endothelial cells
Ndufb7	3.09525e-16	-0.601906	0.012	0.134	7.62112e-12	Downregulated	HT vs HW	Endothelial cells
Tsc22d2	3.12498e-16	-0.630414	0.156	0.493	7.69433e-12	Downregulated	HT vs HW	Endothelial cells
Phka2	3.13239e-16	-0.297268	0.003	0.09	7.71257e-12	Downregulated	HT vs HW	Endothelial cells
Kank4	3.17774e-16	-0.657935	0.051	0.254	7.82422e-12	Downregulated	HT vs HW	Endothelial cells
Slc38a10	3.206e-16	-0.632822	0.053	0.261	7.89382e-12	Downregulated	HT vs HW	Endothelial cells
Tomm7	3.25212e-16	-0.38412	0.007	0.112	8.00736e-12	Downregulated	HT vs HW	Endothelial cells
Klf2	3.29253e-16	-0.736448	0.179	0.522	8.10687e-12	Downregulated	HT vs HW	Endothelial cells
Eci1	3.32336e-16	-0.278744	0.003	0.09	8.18279e-12	Downregulated	HT vs HW	Endothelial cells
Pacsin2	3.39042e-16	-0.435403	0.155	0.5	8.34789e-12	Downregulated	HT vs HW	Endothelial cells
Pir	3.44779e-16	-0.595881	0.086	0.343	8.48915e-12	Downregulated	HT vs HW	Endothelial cells
Map1lc3a	3.55188e-16	-0.311072	0.007	0.112	8.74544e-12	Downregulated	HT vs HW	Endothelial cells
Taldo1	3.56772e-16	-0.369851	0.003	0.09	8.78445e-12	Downregulated	HT vs HW	Endothelial cells
Mgat2	3.57863e-16	-0.471714	0.016	0.149	8.81131e-12	Downregulated	HT vs HW	Endothelial cells
9930111J21Rik2	3.63232e-16	-0.404175	0.012	0.134	8.94351e-12	Downregulated	HT vs HW	Endothelial cells
Dynlrb1	3.69394e-16	-0.440474	0.012	0.134	9.09522e-12	Downregulated	HT vs HW	Endothelial cells
Slc4a7	3.88716e-16	-0.513298	0.064	0.291	9.57097e-12	Downregulated	HT vs HW	Endothelial cells
Carmil1	4.01517e-16	-0.660403	0.091	0.351	9.88616e-12	Downregulated	HT vs HW	Endothelial cells
Jag2	4.19031e-16	-0.491723	0.125	0.433	1.03174e-11	Downregulated	HT vs HW	Endothelial cells
Tm2d2	4.22203e-16	-0.47019	0.002	0.082	1.03955e-11	Downregulated	HT vs HW	Endothelial cells
Atp2b4	4.30025e-16	-0.6266	0.218	0.604	1.05881e-11	Downregulated	HT vs HW	Endothelial cells
Sema3f	4.38919e-16	-0.547988	0.096	0.366	1.08071e-11	Downregulated	HT vs HW	Endothelial cells
Tmem185b	4.49765e-16	-0.309597	0.002	0.082	1.10741e-11	Downregulated	HT vs HW	Endothelial cells
Rnf13	4.51946e-16	-0.552633	0.059	0.276	1.11278e-11	Downregulated	HT vs HW	Endothelial cells
Nupr1	4.55487e-16	-0.362709	0.002	0.082	1.1215e-11	Downregulated	HT vs HW	Endothelial cells
Plod3	4.61029e-16	-0.343504	0.014	0.142	1.13514e-11	Downregulated	HT vs HW	Endothelial cells
Tspan2	4.79607e-16	-0.661493	0.112	0.396	1.18089e-11	Downregulated	HT vs HW	Endothelial cells
Il15ra	4.89641e-16	-0.340793	0.02	0.164	1.20559e-11	Downregulated	HT vs HW	Endothelial cells
Serpini1	4.89641e-16	-0.494892	0.02	0.164	1.20559e-11	Downregulated	HT vs HW	Endothelial cells
Hip1r	4.91338e-16	-0.476465	0.106	0.388	1.20977e-11	Downregulated	HT vs HW	Endothelial cells
Adipoq	4.97595e-16	-0.632686	0.002	0.082	1.22518e-11	Downregulated	HT vs HW	Endothelial cells
Mydgf	5.04122e-16	-0.284676	0.001	0.075	1.24125e-11	Downregulated	HT vs HW	Endothelial cells
Pdha1	5.36655e-16	-0.331924	0.014	0.142	1.32135e-11	Downregulated	HT vs HW	Endothelial cells
Ocln	5.47985e-16	-0.466248	0.016	0.149	1.34925e-11	Downregulated	HT vs HW	Endothelial cells
Lgr4	5.54856e-16	-0.274204	0.001	0.075	1.36617e-11	Downregulated	HT vs HW	Endothelial cells
Abr	5.56309e-16	-0.48828	0.144	0.47	1.36974e-11	Downregulated	HT vs HW	Endothelial cells
Hoxa9	6.21005e-16	-0.337185	0.018	0.157	1.52904e-11	Downregulated	HT vs HW	Endothelial cells
D5Ertd579e	6.93416e-16	-0.68446	0.095	0.358	1.70733e-11	Downregulated	HT vs HW	Endothelial cells
Magt1	7.00492e-16	-0.611174	0.041	0.224	1.72475e-11	Downregulated	HT vs HW	Endothelial cells
Atp1b3	7.23106e-16	-0.59376	0.182	0.545	1.78043e-11	Downregulated	HT vs HW	Endothelial cells
Dkk2	7.50146e-16	-0.947443	0.081	0.321	1.84701e-11	Downregulated	HT vs HW	Endothelial cells
Saraf	7.85908e-16	-0.373185	0.034	0.209	1.93506e-11	Downregulated	HT vs HW	Endothelial cells
P4ha1	8.39068e-16	-0.550813	0.069	0.299	2.06595e-11	Downregulated	HT vs HW	Endothelial cells
Fchsd2	8.57388e-16	-0.810041	0.288	0.679	2.11106e-11	Downregulated	HT vs HW	Endothelial cells
Atf4	9.00792e-16	-0.405126	0.04	0.224	2.21793e-11	Downregulated	HT vs HW	Endothelial cells
Atox1	9.03387e-16	-0.627726	0.067	0.291	2.22432e-11	Downregulated	HT vs HW	Endothelial cells
Itsn1	9.25388e-16	-0.580758	0.058	0.269	2.27849e-11	Downregulated	HT vs HW	Endothelial cells
Snx10	9.58503e-16	-0.434177	0.025	0.179	2.36003e-11	Downregulated	HT vs HW	Endothelial cells
Nedd8	1.06791e-15	-0.511586	0.023	0.172	2.62941e-11	Downregulated	HT vs HW	Endothelial cells
Sdcbp2	1.13609e-15	-0.336061	0.027	0.187	2.79729e-11	Downregulated	HT vs HW	Endothelial cells
Selp	1.20705e-15	-0.547539	0.073	0.306	2.97201e-11	Downregulated	HT vs HW	Endothelial cells
2023-03-05	1.28322e-15	-0.559047	0.033	0.201	3.15954e-11	Downregulated	HT vs HW	Endothelial cells
Socs5	1.31816e-15	-0.515768	0.079	0.321	3.24556e-11	Downregulated	HT vs HW	Endothelial cells
Rpl35a	1.38426e-15	-0.575567	0.017	0.149	3.40832e-11	Downregulated	HT vs HW	Endothelial cells
Lap3	1.46081e-15	-0.520428	0.028	0.187	3.59681e-11	Downregulated	HT vs HW	Endothelial cells
Extl3	1.52134e-15	-0.510275	0.079	0.321	3.74584e-11	Downregulated	HT vs HW	Endothelial cells
Pdzrn3	1.55177e-15	-0.599559	0.013	0.134	3.82078e-11	Downregulated	HT vs HW	Endothelial cells
Cd36	1.65539e-15	1.25968	0.724	0.403	4.07591e-11	Upregulated	HT vs HW	Endothelial cells
Shisa5	1.75682e-15	-0.561186	0.098	0.366	4.32565e-11	Downregulated	HT vs HW	Endothelial cells
Stk24	1.77556e-15	-0.474119	0.222	0.619	4.37177e-11	Downregulated	HT vs HW	Endothelial cells
Ccdc3	1.82517e-15	-0.719637	0.048	0.239	4.49394e-11	Downregulated	HT vs HW	Endothelial cells
Eef1d	2.05111e-15	-0.314635	0.013	0.134	5.05024e-11	Downregulated	HT vs HW	Endothelial cells
Amfr	2.09257e-15	-0.558294	0.086	0.336	5.15232e-11	Downregulated	HT vs HW	Endothelial cells
Dnajc3	2.12779e-15	-0.487312	0.093	0.358	5.23905e-11	Downregulated	HT vs HW	Endothelial cells
Hyal2	2.18126e-15	-0.474932	0.033	0.201	5.3707e-11	Downregulated	HT vs HW	Endothelial cells
Apoe	2.18891e-15	-0.703329	0.005	0.097	5.38952e-11	Downregulated	HT vs HW	Endothelial cells
Col5a3	2.2047e-15	-0.555629	0.008	0.112	5.4284e-11	Downregulated	HT vs HW	Endothelial cells
Cyb5b	2.40972e-15	-0.59895	0.051	0.246	5.9332e-11	Downregulated	HT vs HW	Endothelial cells
Suclg1	2.43945e-15	-0.348528	0.019	0.157	6.0064e-11	Downregulated	HT vs HW	Endothelial cells
Rps24	2.71222e-15	-0.750843	0.051	0.246	6.67804e-11	Downregulated	HT vs HW	Endothelial cells
Rpl34	3.08705e-15	-0.594203	0.02	0.157	7.60094e-11	Downregulated	HT vs HW	Endothelial cells
Tnfrsf1a	3.51729e-15	-0.52056	0.056	0.261	8.66026e-11	Downregulated	HT vs HW	Endothelial cells
Stt3a	3.83917e-15	-0.467469	0.048	0.239	9.4528e-11	Downregulated	HT vs HW	Endothelial cells
Pdlim3	3.89826e-15	-0.445892	0.022	0.164	9.5983e-11	Downregulated	HT vs HW	Endothelial cells
Hs6st1	4.08479e-15	-0.4258	0.01	0.119	1.00576e-10	Downregulated	HT vs HW	Endothelial cells
Clec14a	4.11959e-15	-0.454317	0.092	0.351	1.01433e-10	Downregulated	HT vs HW	Endothelial cells
Chst12	4.21103e-15	-0.300026	0.01	0.119	1.03684e-10	Downregulated	HT vs HW	Endothelial cells
Rp2	4.24916e-15	-0.521419	0.024	0.172	1.04623e-10	Downregulated	HT vs HW	Endothelial cells
Klk10	4.34113e-15	-0.464295	0.01	0.119	1.06887e-10	Downregulated	HT vs HW	Endothelial cells
St8sia6	4.42278e-15	-0.623	0.082	0.321	1.08898e-10	Downregulated	HT vs HW	Endothelial cells
Nomo1	4.69327e-15	-0.545853	0.02	0.157	1.15558e-10	Downregulated	HT vs HW	Endothelial cells
Dock11	4.85711e-15	-0.634352	0.089	0.336	1.19592e-10	Downregulated	HT vs HW	Endothelial cells
Mrpl14	4.96247e-15	-0.414975	0.004	0.09	1.22186e-10	Downregulated	HT vs HW	Endothelial cells
9530068E07Rik	5.20719e-15	-0.469275	0.029	0.187	1.28211e-10	Downregulated	HT vs HW	Endothelial cells
Ski	5.23086e-15	-0.624352	0.24	0.627	1.28794e-10	Downregulated	HT vs HW	Endothelial cells
Ube2b	5.29897e-15	-0.54851	0.04	0.216	1.30471e-10	Downregulated	HT vs HW	Endothelial cells
Lars2	5.368e-15	-0.531543	0.051	0.246	1.32171e-10	Downregulated	HT vs HW	Endothelial cells
Chpt1	5.4189e-15	-0.592226	0.004	0.09	1.33424e-10	Downregulated	HT vs HW	Endothelial cells
Bcr	5.57868e-15	-0.447526	0.147	0.463	1.37358e-10	Downregulated	HT vs HW	Endothelial cells
Tmem14c	5.72489e-15	-0.328158	0.004	0.09	1.40958e-10	Downregulated	HT vs HW	Endothelial cells
Kctd10	5.78395e-15	-0.611977	0.058	0.261	1.42413e-10	Downregulated	HT vs HW	Endothelial cells
Napa	5.7885e-15	-0.446576	0.034	0.201	1.42524e-10	Downregulated	HT vs HW	Endothelial cells
Slco3a1	5.87357e-15	-0.395011	0.2	0.575	1.44619e-10	Downregulated	HT vs HW	Endothelial cells
Ddost	5.91659e-15	-0.283529	0.004	0.09	1.45678e-10	Downregulated	HT vs HW	Endothelial cells
Uqcr10	5.91659e-15	-0.359881	0.004	0.09	1.45678e-10	Downregulated	HT vs HW	Endothelial cells
Mfsd8	5.94913e-15	-0.32193	0.004	0.09	1.46479e-10	Downregulated	HT vs HW	Endothelial cells
Clstn1	6.2442e-15	-0.749465	0.101	0.358	1.53745e-10	Downregulated	HT vs HW	Endothelial cells
Lonrf3	6.32087e-15	-0.410988	0.007	0.104	1.55633e-10	Downregulated	HT vs HW	Endothelial cells
Tmod2	6.6227e-15	-0.57181	0.043	0.224	1.63064e-10	Downregulated	HT vs HW	Endothelial cells
Wwp1	6.66115e-15	-0.63544	0.257	0.627	1.64011e-10	Downregulated	HT vs HW	Endothelial cells
Ctps	7.06903e-15	-0.622703	0.108	0.373	1.74054e-10	Downregulated	HT vs HW	Endothelial cells
Taco1	7.3753e-15	-0.347092	0.139	0.448	1.81595e-10	Downregulated	HT vs HW	Endothelial cells
Bicd2	7.47784e-15	-0.467904	0.063	0.276	1.84119e-10	Downregulated	HT vs HW	Endothelial cells
Eif1	7.54801e-15	-0.559874	0.055	0.254	1.85847e-10	Downregulated	HT vs HW	Endothelial cells
Hs3st1	7.57695e-15	-0.545136	0.092	0.343	1.8656e-10	Downregulated	HT vs HW	Endothelial cells
Tob1	7.87816e-15	-0.258145	0.007	0.104	1.93976e-10	Downregulated	HT vs HW	Endothelial cells
Ehd3	8.1073e-15	-0.464962	0.007	0.104	1.99618e-10	Downregulated	HT vs HW	Endothelial cells
Tram2	8.78513e-15	-0.420877	0.068	0.291	2.16308e-10	Downregulated	HT vs HW	Endothelial cells
Avpi1	9.08647e-15	-0.31512	0.016	0.142	2.23727e-10	Downregulated	HT vs HW	Endothelial cells
Acaca	1.0045e-14	-0.267989	0.016	0.142	2.47327e-10	Downregulated	HT vs HW	Endothelial cells
Phkg1	1.07901e-14	-0.352425	0.003	0.082	2.65675e-10	Downregulated	HT vs HW	Endothelial cells
Col15a1	1.14552e-14	-0.870559	0.033	0.194	2.8205e-10	Downregulated	HT vs HW	Endothelial cells
Selenow	1.18875e-14	-0.56498	0.068	0.284	2.92695e-10	Downregulated	HT vs HW	Endothelial cells
Dctn3	1.19778e-14	-0.254373	0.003	0.082	2.94918e-10	Downregulated	HT vs HW	Endothelial cells
Map6	1.24731e-14	-0.447767	0.039	0.209	3.07112e-10	Downregulated	HT vs HW	Endothelial cells
Ramp2	1.24758e-14	-0.659252	0.122	0.403	3.07179e-10	Downregulated	HT vs HW	Endothelial cells
Mllt3	1.35406e-14	-0.864933	0.234	0.582	3.33396e-10	Downregulated	HT vs HW	Endothelial cells
Cox5b	1.36762e-14	-0.233645	0	0.06	3.36736e-10	Stable	HT vs HW	Endothelial cells
Emc6	1.36762e-14	-0.357364	0	0.06	3.36736e-10	Downregulated	HT vs HW	Endothelial cells
Hacd4	1.46943e-14	-0.567117	0.045	0.224	3.61803e-10	Downregulated	HT vs HW	Endothelial cells
Bst2	1.51132e-14	-0.540065	0.028	0.179	3.72118e-10	Downregulated	HT vs HW	Endothelial cells
Mtdh	1.56605e-14	-0.606513	0.198	0.545	3.85594e-10	Downregulated	HT vs HW	Endothelial cells
Pkm	1.58683e-14	-0.563845	0.028	0.179	3.90709e-10	Downregulated	HT vs HW	Endothelial cells
Slc5a3	1.65349e-14	-0.43158	0.009	0.112	4.07122e-10	Downregulated	HT vs HW	Endothelial cells
Plxnd1	1.74708e-14	-0.507917	0.212	0.575	4.30165e-10	Downregulated	HT vs HW	Endothelial cells
Frmd4b	1.77089e-14	-0.561671	0.21	0.567	4.36028e-10	Downregulated	HT vs HW	Endothelial cells
Trak2	1.77186e-14	-0.298421	0.101	0.366	4.36268e-10	Downregulated	HT vs HW	Endothelial cells
Zcchc14	1.80374e-14	-0.471597	0.206	0.575	4.44117e-10	Downregulated	HT vs HW	Endothelial cells
Prkaa2	1.87961e-14	-0.362814	0.002	0.075	4.62797e-10	Downregulated	HT vs HW	Endothelial cells
Ran	1.87961e-14	-0.274572	0.002	0.075	4.62797e-10	Downregulated	HT vs HW	Endothelial cells
Sfxn5	1.90309e-14	-0.279294	0.002	0.075	4.6858e-10	Downregulated	HT vs HW	Endothelial cells
Lrrfip1	1.90479e-14	-0.668185	0.325	0.746	4.68997e-10	Downregulated	HT vs HW	Endothelial cells
Park7	1.95887e-14	-0.653412	0.011	0.119	4.82314e-10	Downregulated	HT vs HW	Endothelial cells
Capns1	1.97799e-14	-0.346948	0.073	0.299	4.87022e-10	Downregulated	HT vs HW	Endothelial cells
Paqr9	1.99997e-14	-0.49586	0.002	0.075	4.92432e-10	Downregulated	HT vs HW	Endothelial cells
Arf5	2.0189e-14	-0.385389	0.039	0.209	4.97094e-10	Downregulated	HT vs HW	Endothelial cells
Cidec	2.05021e-14	-0.729472	0.002	0.075	5.04802e-10	Downregulated	HT vs HW	Endothelial cells
Ece1	2.07731e-14	-0.653339	0.337	0.769	5.11476e-10	Downregulated	HT vs HW	Endothelial cells
Nme1	2.12791e-14	-0.241789	0.002	0.075	5.23933e-10	Stable	HT vs HW	Endothelial cells
Hist1h2bc	2.23643e-14	-0.441862	0.006	0.097	5.50655e-10	Downregulated	HT vs HW	Endothelial cells
Dhrs3	2.25926e-14	-0.582368	0.036	0.201	5.56276e-10	Downregulated	HT vs HW	Endothelial cells
Hadh	2.30365e-14	-0.428137	0.006	0.097	5.67205e-10	Downregulated	HT vs HW	Endothelial cells
Lasp1	2.31728e-14	-0.472472	0.11	0.381	5.7056e-10	Downregulated	HT vs HW	Endothelial cells
Ndufb2	2.39638e-14	-0.356716	0.006	0.097	5.90036e-10	Downregulated	HT vs HW	Endothelial cells
Tmub2	2.39638e-14	-0.279359	0.006	0.097	5.90036e-10	Downregulated	HT vs HW	Endothelial cells
Pgm2l1	2.68596e-14	-0.477577	0.081	0.313	6.61337e-10	Downregulated	HT vs HW	Endothelial cells
Slc25a51	2.72802e-14	-0.478237	0.013	0.127	6.71694e-10	Downregulated	HT vs HW	Endothelial cells
Cd24a	2.77795e-14	-0.279053	0.006	0.097	6.83988e-10	Downregulated	HT vs HW	Endothelial cells
Gucy1b3	2.79769e-14	-0.463801	0.017	0.142	6.88846e-10	Downregulated	HT vs HW	Endothelial cells
Alas1	2.88941e-14	-0.277546	0.006	0.097	7.11431e-10	Downregulated	HT vs HW	Endothelial cells
Fis1	3.16227e-14	-0.362485	0.05	0.239	7.78613e-10	Downregulated	HT vs HW	Endothelial cells
Slco2a1	3.47926e-14	-0.68515	0.083	0.313	8.56663e-10	Downregulated	HT vs HW	Endothelial cells
Zc3h12b	3.50195e-14	-0.556679	0.04	0.209	8.62251e-10	Downregulated	HT vs HW	Endothelial cells
Rack1	3.53172e-14	-0.796422	0.042	0.209	8.6958e-10	Downregulated	HT vs HW	Endothelial cells
Rps6ka5	3.68056e-14	-0.595522	0.173	0.493	9.06226e-10	Downregulated	HT vs HW	Endothelial cells
Dlg4	3.81183e-14	-0.336538	0.026	0.172	9.38549e-10	Downregulated	HT vs HW	Endothelial cells
Purb	4.69069e-14	-0.60909	0.07	0.284	1.15494e-09	Downregulated	HT vs HW	Endothelial cells
Cyb5r3	4.96362e-14	-0.536293	0.029	0.179	1.22214e-09	Downregulated	HT vs HW	Endothelial cells
Kank2	5.0137e-14	-0.450044	0.072	0.291	1.23447e-09	Downregulated	HT vs HW	Endothelial cells
Trpm6	5.08038e-14	-0.585422	0.067	0.276	1.25089e-09	Downregulated	HT vs HW	Endothelial cells
Zbtb38	5.08821e-14	-0.453308	0.116	0.388	1.25282e-09	Downregulated	HT vs HW	Endothelial cells
Jun	5.17686e-14	-0.447039	0.075	0.299	1.27465e-09	Downregulated	HT vs HW	Endothelial cells
Wls	5.21684e-14	-0.639548	0.068	0.276	1.28449e-09	Downregulated	HT vs HW	Endothelial cells
Sbno2	5.27069e-14	-0.423392	0.117	0.388	1.29775e-09	Downregulated	HT vs HW	Endothelial cells
Sncg	5.63983e-14	-0.339479	0.008	0.104	1.38864e-09	Downregulated	HT vs HW	Endothelial cells
Rpl4	5.6968e-14	-0.552669	0.027	0.172	1.40267e-09	Downregulated	HT vs HW	Endothelial cells
Ptms	5.85496e-14	-0.470298	0.092	0.336	1.44161e-09	Downregulated	HT vs HW	Endothelial cells
Zfhx3	5.99866e-14	-0.56736	0.131	0.41	1.47699e-09	Downregulated	HT vs HW	Endothelial cells
Ergic3	6.40061e-14	-0.269556	0.008	0.104	1.57596e-09	Downregulated	HT vs HW	Endothelial cells
Apba1	6.48672e-14	-0.747422	0.157	0.448	1.59716e-09	Downregulated	HT vs HW	Endothelial cells
Slc9a6	6.74406e-14	-0.263537	0.005	0.09	1.66052e-09	Downregulated	HT vs HW	Endothelial cells
Slc35a5	6.75674e-14	-0.349414	0.008	0.104	1.66365e-09	Downregulated	HT vs HW	Endothelial cells
Rpn1	7.09816e-14	-0.284005	0.005	0.09	1.74771e-09	Downregulated	HT vs HW	Endothelial cells
Fndc3b	7.4277e-14	-0.707234	0.417	0.821	1.82885e-09	Downregulated	HT vs HW	Endothelial cells
G6pc3	7.62478e-14	-0.252508	0.005	0.09	1.87737e-09	Downregulated	HT vs HW	Endothelial cells
Ifitm2	8.10548e-14	-0.482543	0.016	0.134	1.99573e-09	Downregulated	HT vs HW	Endothelial cells
Gnptab	8.54136e-14	-0.344552	0.022	0.157	2.10305e-09	Downregulated	HT vs HW	Endothelial cells
Mob2	8.575e-14	-0.482056	0.227	0.597	2.11134e-09	Downregulated	HT vs HW	Endothelial cells
Dlat	8.65228e-14	-0.478215	0.025	0.164	2.13037e-09	Downregulated	HT vs HW	Endothelial cells
Hey2	9.23813e-14	-0.391561	0.032	0.187	2.27461e-09	Downregulated	HT vs HW	Endothelial cells
Sec23ip	9.3795e-14	-0.386848	0.061	0.261	2.30942e-09	Downregulated	HT vs HW	Endothelial cells
Txndc5	9.51355e-14	-0.658178	0.072	0.284	2.34243e-09	Downregulated	HT vs HW	Endothelial cells
Derl1	9.81476e-14	-0.38502	0.018	0.142	2.41659e-09	Downregulated	HT vs HW	Endothelial cells
Fkbp9	1.11456e-13	-0.555384	0.088	0.321	2.74427e-09	Downregulated	HT vs HW	Endothelial cells
Tmem170b	1.12784e-13	-0.459824	0.018	0.142	2.77697e-09	Downregulated	HT vs HW	Endothelial cells
Lbp	1.16991e-13	-0.706156	0.014	0.127	2.88055e-09	Downregulated	HT vs HW	Endothelial cells
Klf6	1.18354e-13	-0.650207	0.203	0.537	2.9141e-09	Downregulated	HT vs HW	Endothelial cells
2810004N23Rik	1.20756e-13	-0.409153	0.016	0.134	2.97326e-09	Downregulated	HT vs HW	Endothelial cells
Ccdc85a	1.25056e-13	2.24596	0.44	0.112	3.07913e-09	Upregulated	HT vs HW	Endothelial cells
Pqlc1	1.40846e-13	-0.391257	0.114	0.381	3.4679e-09	Downregulated	HT vs HW	Endothelial cells
Arl15	1.48695e-13	-1.04605	0.736	0.903	3.66117e-09	Downregulated	HT vs HW	Endothelial cells
Rpl23	1.60784e-13	-0.566304	0.04	0.201	3.95883e-09	Downregulated	HT vs HW	Endothelial cells
Pcsk5	1.62275e-13	-0.440322	0.169	0.485	3.99554e-09	Downregulated	HT vs HW	Endothelial cells
Cnih4	1.83857e-13	-0.307664	0.007	0.097	4.52692e-09	Downregulated	HT vs HW	Endothelial cells
Mcl1	1.87104e-13	-0.327633	0.163	0.485	4.60687e-09	Downregulated	HT vs HW	Endothelial cells
Enpp5	1.98072e-13	-0.18659	0.004	0.082	4.87692e-09	Stable	HT vs HW	Endothelial cells
Pnpla2	2.002e-13	-0.554497	0.004	0.082	4.92933e-09	Downregulated	HT vs HW	Endothelial cells
Txn1	2.01055e-13	-0.678058	0.019	0.142	4.95037e-09	Downregulated	HT vs HW	Endothelial cells
Mrpl2	2.03435e-13	-0.265259	0.004	0.082	5.00897e-09	Downregulated	HT vs HW	Endothelial cells
Shtn1	2.09882e-13	-0.485698	0.128	0.403	5.16771e-09	Downregulated	HT vs HW	Endothelial cells
S100a13	2.20688e-13	-0.450937	0.036	0.194	5.43378e-09	Downregulated	HT vs HW	Endothelial cells
mt-Nd3	2.27915e-13	-0.524831	0.026	0.164	5.61172e-09	Downregulated	HT vs HW	Endothelial cells
Olfml2a	2.46263e-13	-0.356121	0.033	0.187	6.06349e-09	Downregulated	HT vs HW	Endothelial cells
Rps9	2.46868e-13	-0.617036	0.029	0.172	6.07837e-09	Downregulated	HT vs HW	Endothelial cells
AU021092	2.58176e-13	-0.333146	0.021	0.149	6.3568e-09	Downregulated	HT vs HW	Endothelial cells
Itgav	2.67432e-13	-0.457336	0.062	0.261	6.58471e-09	Downregulated	HT vs HW	Endothelial cells
Cald1	2.68111e-13	-0.864492	0.352	0.709	6.60144e-09	Downregulated	HT vs HW	Endothelial cells
Cltc	2.80399e-13	-0.522264	0.187	0.515	6.90398e-09	Downregulated	HT vs HW	Endothelial cells
Tmed10	2.80466e-13	-0.535239	0.1	0.343	6.90562e-09	Downregulated	HT vs HW	Endothelial cells
Fbxw11	2.90355e-13	-0.504435	0.194	0.522	7.14912e-09	Downregulated	HT vs HW	Endothelial cells
Nenf	2.931e-13	-0.367405	0.009	0.104	7.21672e-09	Downregulated	HT vs HW	Endothelial cells
Rab11a	2.94731e-13	-0.38336	0.168	0.485	7.25687e-09	Downregulated	HT vs HW	Endothelial cells
AY036118	3.0882e-13	-0.715964	0.019	0.142	7.60376e-09	Downregulated	HT vs HW	Endothelial cells
Ccdc50	3.10255e-13	-0.389908	0.148	0.448	7.63909e-09	Downregulated	HT vs HW	Endothelial cells
Mmrn2	3.12403e-13	-0.604038	0.251	0.612	7.69199e-09	Downregulated	HT vs HW	Endothelial cells
Slc25a3	3.13304e-13	-0.540359	0.103	0.351	7.71417e-09	Downregulated	HT vs HW	Endothelial cells
Car3	3.16815e-13	-1.40606	0.017	0.134	7.80062e-09	Downregulated	HT vs HW	Endothelial cells
Plaur	3.49749e-13	-0.533155	0.04	0.201	8.61153e-09	Downregulated	HT vs HW	Endothelial cells
Man2b1	3.6642e-13	-0.287448	0.009	0.104	9.02198e-09	Downregulated	HT vs HW	Endothelial cells
Spcs2	3.72097e-13	-0.461299	0.017	0.134	9.16177e-09	Downregulated	HT vs HW	Endothelial cells
Scand1	3.7596e-13	-0.312271	0.009	0.104	9.25689e-09	Downregulated	HT vs HW	Endothelial cells
Lyst	3.94121e-13	-0.512708	0.143	0.433	9.70404e-09	Downregulated	HT vs HW	Endothelial cells
Dedd	3.94668e-13	-0.288298	0.036	0.194	9.71751e-09	Downregulated	HT vs HW	Endothelial cells
Atp5h	4.08937e-13	-0.282633	0.003	0.075	1.00689e-08	Downregulated	HT vs HW	Endothelial cells
Pld3	4.13595e-13	-0.265366	0.003	0.075	1.01835e-08	Downregulated	HT vs HW	Endothelial cells
Tmem160	4.13595e-13	-0.275872	0.003	0.075	1.01835e-08	Downregulated	HT vs HW	Endothelial cells
Lrmp	4.13973e-13	-0.382314	0.031	0.179	1.01928e-08	Downregulated	HT vs HW	Endothelial cells
Ifitm10	4.21873e-13	-0.479712	0.017	0.134	1.03874e-08	Downregulated	HT vs HW	Endothelial cells
Stk39	4.25314e-13	-0.425513	0.155	0.455	1.04721e-08	Downregulated	HT vs HW	Endothelial cells
Khdrbs3	4.38346e-13	-0.388635	0.017	0.134	1.0793e-08	Downregulated	HT vs HW	Endothelial cells
AI467606	4.42653e-13	-0.217669	0.003	0.075	1.0899e-08	Stable	HT vs HW	Endothelial cells
Kcnh1	4.47551e-13	-0.422413	0.013	0.119	1.10196e-08	Downregulated	HT vs HW	Endothelial cells
Entpd1	4.51953e-13	-0.633849	0.303	0.694	1.1128e-08	Downregulated	HT vs HW	Endothelial cells
Cox14	4.52777e-13	-0.198158	0.003	0.075	1.11483e-08	Stable	HT vs HW	Endothelial cells
Slc25a5	4.52777e-13	-0.242747	0.003	0.075	1.11483e-08	Stable	HT vs HW	Endothelial cells
Zyx	4.55012e-13	-0.508469	0.091	0.321	1.12033e-08	Downregulated	HT vs HW	Endothelial cells
Nr1d2	4.579e-13	-0.410329	0.109	0.366	1.12744e-08	Downregulated	HT vs HW	Endothelial cells
Arpp19	4.6087e-13	-0.345828	0.057	0.246	1.13475e-08	Downregulated	HT vs HW	Endothelial cells
Sh2b3	4.92683e-13	-0.278318	0.063	0.261	1.21308e-08	Downregulated	HT vs HW	Endothelial cells
Lep	4.96787e-13	-0.968162	0.024	0.157	1.22319e-08	Downregulated	HT vs HW	Endothelial cells
Rph3al	4.97156e-13	-0.452434	0.165	0.478	1.2241e-08	Downregulated	HT vs HW	Endothelial cells
Akr1a1	5.0011e-13	-0.480929	0.064	0.261	1.23137e-08	Downregulated	HT vs HW	Endothelial cells
Mpp1	5.09337e-13	-0.27767	0.015	0.127	1.25409e-08	Downregulated	HT vs HW	Endothelial cells
Tm9sf3	5.19109e-13	-0.572662	0.161	0.455	1.27815e-08	Downregulated	HT vs HW	Endothelial cells
Cox5a	5.41702e-13	-0.359096	0.015	0.127	1.33378e-08	Downregulated	HT vs HW	Endothelial cells
Gan	5.46638e-13	-0.539253	0.053	0.231	1.34593e-08	Downregulated	HT vs HW	Endothelial cells
Ndufa4	5.62968e-13	-0.53375	0.006	0.09	1.38614e-08	Downregulated	HT vs HW	Endothelial cells
Gli3	5.88523e-13	-0.309345	0.013	0.119	1.44906e-08	Downregulated	HT vs HW	Endothelial cells
4930440I19Rik	5.96296e-13	-0.553236	0.006	0.09	1.4682e-08	Downregulated	HT vs HW	Endothelial cells
Ndufs2	6.0406e-13	-0.549666	0.022	0.149	1.48732e-08	Downregulated	HT vs HW	Endothelial cells
Agpat2	6.07754e-13	-0.244211	0	0.052	1.49641e-08	Stable	HT vs HW	Endothelial cells
Cebpb	6.07754e-13	-0.275533	0	0.052	1.49641e-08	Downregulated	HT vs HW	Endothelial cells
Mt1	6.07754e-13	-0.266935	0	0.052	1.49641e-08	Downregulated	HT vs HW	Endothelial cells
Pmp22	6.07754e-13	-0.17434	0	0.052	1.49641e-08	Stable	HT vs HW	Endothelial cells
Vsig8	6.07754e-13	-0.205113	0	0.052	1.49641e-08	Stable	HT vs HW	Endothelial cells
Cyb561	6.31784e-13	-0.481387	0.047	0.216	1.55558e-08	Downregulated	HT vs HW	Endothelial cells
Mannr	6.56e-13	-0.492424	0.088	0.313	1.6152e-08	Downregulated	HT vs HW	Endothelial cells
Txndc17	6.56198e-13	-0.243135	0.006	0.09	1.61569e-08	Stable	HT vs HW	Endothelial cells
Ptpn3	7.0431e-13	-0.423602	0.037	0.194	1.73415e-08	Downregulated	HT vs HW	Endothelial cells
Asap2	7.06407e-13	-0.5479	0.188	0.507	1.73932e-08	Downregulated	HT vs HW	Endothelial cells
Dtd2	7.12855e-13	-0.281516	0.002	0.067	1.75519e-08	Downregulated	HT vs HW	Endothelial cells
Skil	7.34287e-13	-0.415661	0.109	0.358	1.80796e-08	Downregulated	HT vs HW	Endothelial cells
Srgn	7.38732e-13	-0.509687	0.159	0.455	1.81891e-08	Downregulated	HT vs HW	Endothelial cells
Il1r1	7.39134e-13	-0.419988	0.131	0.403	1.8199e-08	Downregulated	HT vs HW	Endothelial cells
Ier2	7.40033e-13	-0.303274	0.037	0.194	1.82211e-08	Downregulated	HT vs HW	Endothelial cells
Lurap1	7.4985e-13	-0.254689	0.013	0.119	1.84628e-08	Downregulated	HT vs HW	Endothelial cells
Mctp1	7.56935e-13	-0.729958	0.087	0.306	1.86372e-08	Downregulated	HT vs HW	Endothelial cells
Mrpl17	7.57582e-13	-0.271515	0.002	0.067	1.86532e-08	Downregulated	HT vs HW	Endothelial cells
Ypel5	7.58537e-13	-0.45053	0.022	0.149	1.86767e-08	Downregulated	HT vs HW	Endothelial cells
Bpgm	7.75563e-13	-0.48705	0.041	0.201	1.90959e-08	Downregulated	HT vs HW	Endothelial cells
Rer1	8.13041e-13	-0.374777	0.022	0.149	2.00187e-08	Downregulated	HT vs HW	Endothelial cells
Dhrs7	8.14901e-13	-0.190303	0.002	0.067	2.00645e-08	Stable	HT vs HW	Endothelial cells
Ncor2	8.51402e-13	-0.346422	0.149	0.44	2.09632e-08	Downregulated	HT vs HW	Endothelial cells
Acadl	8.71294e-13	-0.501092	0.066	0.261	2.1453e-08	Downregulated	HT vs HW	Endothelial cells
Rabac1	8.97789e-13	-0.567467	0.039	0.194	2.21054e-08	Downregulated	HT vs HW	Endothelial cells
Fuca1	9.22161e-13	-0.344291	0.022	0.149	2.27054e-08	Downregulated	HT vs HW	Endothelial cells
Gm44026	9.65613e-13	-0.16811	0.001	0.06	2.37753e-08	Stable	HT vs HW	Endothelial cells
mt-Atp6	9.65613e-13	-0.225844	0.001	0.06	2.37753e-08	Stable	HT vs HW	Endothelial cells
Atp2b2	9.9384e-13	-0.51685	0.027	0.164	2.44703e-08	Downregulated	HT vs HW	Endothelial cells
Uggt1	1.118e-12	-0.310837	0.112	0.373	2.75275e-08	Downregulated	HT vs HW	Endothelial cells
Kank1	1.20922e-12	-0.477377	0.039	0.194	2.97735e-08	Downregulated	HT vs HW	Endothelial cells
Cadps2	1.21354e-12	-0.576907	0.174	0.478	2.98797e-08	Downregulated	HT vs HW	Endothelial cells
Lama3	1.25959e-12	-0.62065	0.161	0.448	3.10136e-08	Downregulated	HT vs HW	Endothelial cells
Mettl7a1	1.3774e-12	-0.41609	0.03	0.172	3.39143e-08	Downregulated	HT vs HW	Endothelial cells
Pkd1	1.41823e-12	-0.247655	0.194	0.53	3.49197e-08	Stable	HT vs HW	Endothelial cells
Prrt4	1.43378e-12	-0.417733	0.016	0.127	3.53026e-08	Downregulated	HT vs HW	Endothelial cells
Per2	1.51713e-12	-0.406559	0.018	0.134	3.73548e-08	Downregulated	HT vs HW	Endothelial cells
Prune2	1.58005e-12	-0.332837	0.025	0.157	3.8904e-08	Downregulated	HT vs HW	Endothelial cells
A330023F24Rik	1.62154e-12	-0.463386	0.209	0.545	3.99255e-08	Downregulated	HT vs HW	Endothelial cells
Sdha	1.69899e-12	-0.428272	0.106	0.351	4.18327e-08	Downregulated	HT vs HW	Endothelial cells
Dach1	1.74764e-12	1.71265	0.579	0.284	4.30303e-08	Upregulated	HT vs HW	Endothelial cells
Golim4	1.79157e-12	-0.404094	0.135	0.41	4.41119e-08	Downregulated	HT vs HW	Endothelial cells
Tcirg1	1.80709e-12	-0.442443	0.014	0.119	4.44941e-08	Downregulated	HT vs HW	Endothelial cells
Msn	1.81554e-12	-0.654929	0.252	0.604	4.47023e-08	Downregulated	HT vs HW	Endothelial cells
Cnbp	1.83244e-12	-0.326399	0.094	0.328	4.51182e-08	Downregulated	HT vs HW	Endothelial cells
Map7	1.86194e-12	-0.29124	0.005	0.082	4.58448e-08	Downregulated	HT vs HW	Endothelial cells
Sel1l	1.8912e-12	-0.504477	0.119	0.373	4.6565e-08	Downregulated	HT vs HW	Endothelial cells
Myl6	1.93898e-12	-0.486394	0.102	0.343	4.77415e-08	Downregulated	HT vs HW	Endothelial cells
Etl4	2.0109e-12	1.15602	0.781	0.784	4.95123e-08	Upregulated	HT vs HW	Endothelial cells
Ermp1	2.01593e-12	-0.350679	0.005	0.082	4.96362e-08	Downregulated	HT vs HW	Endothelial cells
Fkbp1a	2.05413e-12	-0.386541	0.163	0.463	5.05767e-08	Downregulated	HT vs HW	Endothelial cells
Rab24	2.10363e-12	-0.24597	0.012	0.112	5.17955e-08	Stable	HT vs HW	Endothelial cells
Pdia6	2.10833e-12	-0.4262	0.023	0.149	5.19114e-08	Downregulated	HT vs HW	Endothelial cells
Tm9sf2	2.11225e-12	-0.367507	0.109	0.358	5.20078e-08	Downregulated	HT vs HW	Endothelial cells
Asah1	2.35987e-12	-0.301673	0.012	0.112	5.81048e-08	Downregulated	HT vs HW	Endothelial cells
Hif1a	2.38167e-12	-0.566771	0.11	0.351	5.86415e-08	Downregulated	HT vs HW	Endothelial cells
Phc2	2.48031e-12	-0.357228	0.141	0.425	6.10701e-08	Downregulated	HT vs HW	Endothelial cells
Prdx1	2.48668e-12	-0.344787	0.023	0.149	6.1227e-08	Downregulated	HT vs HW	Endothelial cells
Nedd9	2.5196e-12	-0.607	0.254	0.604	6.20376e-08	Downregulated	HT vs HW	Endothelial cells
Lrpap1	2.5867e-12	-0.309954	0.012	0.112	6.36897e-08	Downregulated	HT vs HW	Endothelial cells
Ahdc1	2.64656e-12	-0.369306	0.09	0.313	6.51636e-08	Downregulated	HT vs HW	Endothelial cells
Rps8	3.0941e-12	-0.435703	0.021	0.142	7.61829e-08	Downregulated	HT vs HW	Endothelial cells
Tmed5	3.16776e-12	-0.462842	0.099	0.328	7.79967e-08	Downregulated	HT vs HW	Endothelial cells
Hspa9	3.30415e-12	-0.486156	0.026	0.157	8.13549e-08	Downregulated	HT vs HW	Endothelial cells
Pdlim4	3.35254e-12	-0.50229	0.026	0.157	8.25462e-08	Downregulated	HT vs HW	Endothelial cells
Ifrd1	3.48659e-12	-0.238187	0.021	0.142	8.58467e-08	Stable	HT vs HW	Endothelial cells
Cdv3	3.52744e-12	-0.319209	0.043	0.201	8.68526e-08	Downregulated	HT vs HW	Endothelial cells
Smad7	3.59552e-12	-0.485458	0.206	0.522	8.85289e-08	Downregulated	HT vs HW	Endothelial cells
Rhpn2	3.6729e-12	-0.412293	0.046	0.209	9.04342e-08	Downregulated	HT vs HW	Endothelial cells
Csrp1	3.9637e-12	-0.457362	0.091	0.313	9.75942e-08	Downregulated	HT vs HW	Endothelial cells
Swap70	4.01012e-12	-0.383042	0.228	0.575	9.87373e-08	Downregulated	HT vs HW	Endothelial cells
Mtpn	4.1577e-12	-0.361188	0.089	0.313	1.02371e-07	Downregulated	HT vs HW	Endothelial cells
Ctsz	4.25453e-12	-0.285136	0.007	0.09	1.04755e-07	Downregulated	HT vs HW	Endothelial cells
Rps27l	4.25453e-12	-0.303186	0.007	0.09	1.04755e-07	Downregulated	HT vs HW	Endothelial cells
Tnfrsf1b	4.25977e-12	-0.382226	0.046	0.209	1.04884e-07	Downregulated	HT vs HW	Endothelial cells
Adamts5	4.33169e-12	-0.350874	0.007	0.09	1.06655e-07	Downregulated	HT vs HW	Endothelial cells
Zbtb44	4.35273e-12	-0.287011	0.09	0.313	1.07173e-07	Downregulated	HT vs HW	Endothelial cells
Ptprs	4.47003e-12	-0.301139	0.007	0.09	1.10061e-07	Downregulated	HT vs HW	Endothelial cells
Mgll	4.65545e-12	1.14153	0.735	0.597	1.14626e-07	Upregulated	HT vs HW	Endothelial cells
Sorbs1	4.69184e-12	1.4035	0.631	0.418	1.15522e-07	Upregulated	HT vs HW	Endothelial cells
Magi1	4.70829e-12	0.803142	0.898	0.903	1.15928e-07	Upregulated	HT vs HW	Endothelial cells
Rab6b	4.74046e-12	-0.382697	0.055	0.231	1.1672e-07	Downregulated	HT vs HW	Endothelial cells
Skap2	4.78816e-12	-0.753468	0.375	0.709	1.17894e-07	Downregulated	HT vs HW	Endothelial cells
Naga	4.86777e-12	-0.335633	0.007	0.09	1.19854e-07	Downregulated	HT vs HW	Endothelial cells
Fam129b	5.04239e-12	-0.354231	0.143	0.418	1.24154e-07	Downregulated	HT vs HW	Endothelial cells
Erlec1	5.28435e-12	-0.427833	0.037	0.187	1.30111e-07	Downregulated	HT vs HW	Endothelial cells
Noc3l	5.5674e-12	-0.319912	0.007	0.09	1.37081e-07	Downregulated	HT vs HW	Endothelial cells
Rhoc	5.66415e-12	-0.556046	0.035	0.179	1.39463e-07	Downregulated	HT vs HW	Endothelial cells
Etfa	5.74668e-12	-0.379721	0.05	0.216	1.41495e-07	Downregulated	HT vs HW	Endothelial cells
Mindy2	6.1125e-12	-0.30961	0.102	0.336	1.50502e-07	Downregulated	HT vs HW	Endothelial cells
Mdh2	6.15194e-12	-0.342244	0.017	0.127	1.51473e-07	Downregulated	HT vs HW	Endothelial cells
Trappc5	6.25958e-12	-0.224501	0.004	0.075	1.54123e-07	Stable	HT vs HW	Endothelial cells
Gabarapl1	6.41675e-12	-0.373863	0.024	0.149	1.57993e-07	Downregulated	HT vs HW	Endothelial cells
Adamts1	6.76648e-12	-0.725052	0.168	0.455	1.66604e-07	Downregulated	HT vs HW	Endothelial cells
Endod1	7.18422e-12	-0.405992	0.013	0.112	1.7689e-07	Downregulated	HT vs HW	Endothelial cells
Il10rb	7.20533e-12	-0.35627	0.011	0.104	1.7741e-07	Downregulated	HT vs HW	Endothelial cells
Atp5d	7.28129e-12	-0.421826	0.015	0.119	1.7928e-07	Downregulated	HT vs HW	Endothelial cells
Crlf2	7.33231e-12	-0.245281	0.009	0.097	1.80536e-07	Stable	HT vs HW	Endothelial cells
Tmcc3	7.39137e-12	1.45175	0.687	0.59	1.8199e-07	Upregulated	HT vs HW	Endothelial cells
Nsun2	7.40804e-12	-0.414136	0.041	0.194	1.82401e-07	Downregulated	HT vs HW	Endothelial cells
Fam120a	7.44003e-12	-0.316918	0.188	0.515	1.83188e-07	Downregulated	HT vs HW	Endothelial cells
Msl1	7.48258e-12	-0.367471	0.113	0.358	1.84236e-07	Downregulated	HT vs HW	Endothelial cells
Klf4	7.52917e-12	-0.356785	0.095	0.321	1.85383e-07	Downregulated	HT vs HW	Endothelial cells
Pdgfrb	7.54056e-12	-0.355801	0.015	0.119	1.85664e-07	Downregulated	HT vs HW	Endothelial cells
Nmnat2	7.6058e-12	-0.849762	0.048	0.209	1.8727e-07	Downregulated	HT vs HW	Endothelial cells
Actn4	7.82344e-12	-0.566045	0.391	0.791	1.92629e-07	Downregulated	HT vs HW	Endothelial cells
Mrpl24	7.97793e-12	-0.268424	0.029	0.164	1.96433e-07	Downregulated	HT vs HW	Endothelial cells
Heatr3	8.2251e-12	-0.397481	0.035	0.179	2.02518e-07	Downregulated	HT vs HW	Endothelial cells
Ndufa6	8.44827e-12	-0.427904	0.011	0.104	2.08013e-07	Downregulated	HT vs HW	Endothelial cells
Greb1l	8.48109e-12	-0.431575	0.011	0.104	2.08821e-07	Downregulated	HT vs HW	Endothelial cells
Cpd	8.60309e-12	-0.383328	0.186	0.5	2.11825e-07	Downregulated	HT vs HW	Endothelial cells
Sfxn1	8.69639e-12	-0.379545	0.032	0.172	2.14122e-07	Downregulated	HT vs HW	Endothelial cells
Chst3	9.11965e-12	-0.369817	0.013	0.112	2.24544e-07	Downregulated	HT vs HW	Endothelial cells
Tlnrd1	9.2326e-12	-0.278445	0.015	0.119	2.27325e-07	Downregulated	HT vs HW	Endothelial cells
Akt2	9.49427e-12	-0.361958	0.013	0.112	2.33768e-07	Downregulated	HT vs HW	Endothelial cells
Tmem176a	9.92013e-12	-0.332631	0.013	0.112	2.44253e-07	Downregulated	HT vs HW	Endothelial cells
Nol9	9.9774e-12	-0.265367	0.011	0.104	2.45664e-07	Downregulated	HT vs HW	Endothelial cells
Rps11	1.02845e-11	-0.476217	0.03	0.164	2.53224e-07	Downregulated	HT vs HW	Endothelial cells
Antxr1	1.07025e-11	-0.389262	0.035	0.179	2.63518e-07	Downregulated	HT vs HW	Endothelial cells
Smim15	1.07365e-11	-0.283714	0.011	0.104	2.64354e-07	Downregulated	HT vs HW	Endothelial cells
Cltb	1.07628e-11	-0.458492	0.066	0.254	2.65001e-07	Downregulated	HT vs HW	Endothelial cells
Cenpt	1.08288e-11	-0.283581	0.013	0.112	2.66626e-07	Downregulated	HT vs HW	Endothelial cells
Nfe2l1	1.10099e-11	-0.513449	0.103	0.328	2.71085e-07	Downregulated	HT vs HW	Endothelial cells
Rtn1	1.1337e-11	-0.504567	0.03	0.164	2.79139e-07	Downregulated	HT vs HW	Endothelial cells
Apex2	1.14706e-11	-0.547002	0.071	0.261	2.82429e-07	Downregulated	HT vs HW	Endothelial cells
Pigu	1.29734e-11	-0.374551	0.02	0.134	3.19431e-07	Downregulated	HT vs HW	Endothelial cells
Itga3	1.30461e-11	-0.477028	0.061	0.239	3.21221e-07	Downregulated	HT vs HW	Endothelial cells
Sgcb	1.3167e-11	-0.320975	0.003	0.067	3.24197e-07	Downregulated	HT vs HW	Endothelial cells
Gns	1.33021e-11	-0.394812	0.006	0.082	3.27524e-07	Downregulated	HT vs HW	Endothelial cells
Mpc2	1.34604e-11	-0.406921	0.003	0.067	3.31422e-07	Downregulated	HT vs HW	Endothelial cells
Sc5d	1.39125e-11	-0.265953	0.003	0.067	3.42555e-07	Downregulated	HT vs HW	Endothelial cells
1110019D14Rik	1.43796e-11	-0.208688	0.003	0.067	3.54054e-07	Stable	HT vs HW	Endothelial cells
Hsdl2	1.43796e-11	-0.171727	0.003	0.067	3.54054e-07	Stable	HT vs HW	Endothelial cells
Mdh1	1.45386e-11	-0.242758	0.003	0.067	3.5797e-07	Stable	HT vs HW	Endothelial cells
Ndufa1	1.46994e-11	-0.319702	0.003	0.067	3.61929e-07	Downregulated	HT vs HW	Endothelial cells
Pde4dip	1.48651e-11	-0.502352	0.033	0.172	3.66009e-07	Downregulated	HT vs HW	Endothelial cells
Zfp91	1.5226e-11	-0.313536	0.118	0.366	3.74894e-07	Downregulated	HT vs HW	Endothelial cells
Elof1	1.53601e-11	-0.269467	0.003	0.067	3.78197e-07	Downregulated	HT vs HW	Endothelial cells
Fgfr1op2	1.54623e-11	-0.394599	0.09	0.306	3.80714e-07	Downregulated	HT vs HW	Endothelial cells
Sar1a	1.54952e-11	-0.436846	0.033	0.172	3.81523e-07	Downregulated	HT vs HW	Endothelial cells
Rnh1	1.56746e-11	-0.432179	0.04	0.187	3.8594e-07	Downregulated	HT vs HW	Endothelial cells
Chchd1	1.57157e-11	-0.276921	0.006	0.082	3.86952e-07	Downregulated	HT vs HW	Endothelial cells
Acadm	1.57885e-11	-0.342803	0.006	0.082	3.88744e-07	Downregulated	HT vs HW	Endothelial cells
Emc1	1.73276e-11	-0.237959	0.042	0.194	4.26639e-07	Stable	HT vs HW	Endothelial cells
Cables1	1.78586e-11	-0.463648	0.062	0.239	4.39713e-07	Downregulated	HT vs HW	Endothelial cells
Ttc39c	1.83169e-11	-0.367881	0.036	0.179	4.50999e-07	Downregulated	HT vs HW	Endothelial cells
Zfp704	2.01943e-11	-0.396522	0.211	0.53	4.97224e-07	Downregulated	HT vs HW	Endothelial cells
Ndufa10	2.08662e-11	-0.36301	0.016	0.119	5.13768e-07	Downregulated	HT vs HW	Endothelial cells
Tspan12	2.15636e-11	-0.587474	0.099	0.313	5.3094e-07	Downregulated	HT vs HW	Endothelial cells
Kras	2.19087e-11	-0.389096	0.179	0.478	5.39436e-07	Downregulated	HT vs HW	Endothelial cells
Dcun1d3	2.31462e-11	-0.385116	0.064	0.246	5.69905e-07	Downregulated	HT vs HW	Endothelial cells
Eif4g1	2.34617e-11	-0.461872	0.162	0.44	5.77675e-07	Downregulated	HT vs HW	Endothelial cells
Fndc1	2.35107e-11	-0.440791	0.068	0.254	5.7888e-07	Downregulated	HT vs HW	Endothelial cells
Nr1d1	2.41015e-11	-0.259739	0.018	0.127	5.93426e-07	Downregulated	HT vs HW	Endothelial cells
Tmem9b	2.50692e-11	-0.243237	0.008	0.09	6.17255e-07	Stable	HT vs HW	Endothelial cells
Rab9	2.51754e-11	-0.465472	0.008	0.09	6.19868e-07	Downregulated	HT vs HW	Endothelial cells
Coro2a	2.61222e-11	-0.360769	0.043	0.194	6.4318e-07	Downregulated	HT vs HW	Endothelial cells
Ndufa2	2.63502e-11	-0.422786	0.012	0.104	6.48794e-07	Downregulated	HT vs HW	Endothelial cells
Camkk2	2.67064e-11	-0.505162	0.066	0.246	6.57565e-07	Downregulated	HT vs HW	Endothelial cells
Cox6a1	2.68221e-11	-0.362877	0.008	0.09	6.60414e-07	Downregulated	HT vs HW	Endothelial cells
Cstb	2.70878e-11	-0.169621	0	0.045	6.66955e-07	Stable	HT vs HW	Endothelial cells
Dolpp1	2.70878e-11	-0.242407	0	0.045	6.66955e-07	Stable	HT vs HW	Endothelial cells
Hebp1	2.70878e-11	-0.204241	0	0.045	6.66955e-07	Stable	HT vs HW	Endothelial cells
Mrps34	2.70878e-11	-0.158348	0	0.045	6.66955e-07	Stable	HT vs HW	Endothelial cells
Rnase4	2.70878e-11	-0.150682	0	0.045	6.66955e-07	Stable	HT vs HW	Endothelial cells
Slc35f6	2.70878e-11	-0.103138	0	0.045	6.66955e-07	Stable	HT vs HW	Endothelial cells
Tspan31	2.70878e-11	-0.159516	0	0.045	6.66955e-07	Stable	HT vs HW	Endothelial cells
Chka	2.73033e-11	-0.365306	0.052	0.216	6.72261e-07	Downregulated	HT vs HW	Endothelial cells
Capn5	2.783e-11	-0.256328	0.023	0.142	6.85231e-07	Downregulated	HT vs HW	Endothelial cells
Stxbp1	2.82741e-11	-0.418558	0.096	0.313	6.96166e-07	Downregulated	HT vs HW	Endothelial cells
Svil	2.83113e-11	-0.554572	0.291	0.642	6.97081e-07	Downregulated	HT vs HW	Endothelial cells
Ppt2	2.8971e-11	-0.242729	0.002	0.06	7.13323e-07	Stable	HT vs HW	Endothelial cells
Slc39a1	2.8971e-11	-0.308551	0.002	0.06	7.13323e-07	Downregulated	HT vs HW	Endothelial cells
1110008P14Rik	2.93167e-11	-0.169352	0.002	0.06	7.21837e-07	Stable	HT vs HW	Endothelial cells
Anapc13	2.96666e-11	-0.225435	0.002	0.06	7.3045e-07	Stable	HT vs HW	Endothelial cells
Mfsd5	2.96666e-11	-0.17224	0.002	0.06	7.3045e-07	Stable	HT vs HW	Endothelial cells
Med14	2.97597e-11	-0.313981	0.105	0.336	7.32743e-07	Downregulated	HT vs HW	Endothelial cells
Tmco1	2.9922e-11	-0.344044	0.026	0.149	7.36739e-07	Downregulated	HT vs HW	Endothelial cells
Ivd	3.00205e-11	-0.19796	0.002	0.06	7.39164e-07	Stable	HT vs HW	Endothelial cells
Pak4	3.00205e-11	-0.166702	0.002	0.06	7.39164e-07	Stable	HT vs HW	Endothelial cells
Sod2	3.00205e-11	-0.180582	0.002	0.06	7.39164e-07	Stable	HT vs HW	Endothelial cells
Snx24	3.03564e-11	-0.483638	0.15	0.418	7.47436e-07	Downregulated	HT vs HW	Endothelial cells
Atg101	3.03785e-11	-0.169211	0.002	0.06	7.47979e-07	Stable	HT vs HW	Endothelial cells
Gm28875	3.07064e-11	-0.371801	0.014	0.112	7.56054e-07	Downregulated	HT vs HW	Endothelial cells
Tubb2a	3.11336e-11	-0.239468	0.012	0.104	7.66571e-07	Stable	HT vs HW	Endothelial cells
Uap1	3.11734e-11	-0.382039	0.065	0.246	7.67552e-07	Downregulated	HT vs HW	Endothelial cells
Usp24	3.13341e-11	-0.438076	0.215	0.537	7.71508e-07	Downregulated	HT vs HW	Endothelial cells
Lgmn	3.15452e-11	-0.302477	0.01	0.097	7.76707e-07	Downregulated	HT vs HW	Endothelial cells
Pfdn5	3.32893e-11	-0.377976	0.026	0.149	8.1965e-07	Downregulated	HT vs HW	Endothelial cells
Gm26883	3.33265e-11	1.8735	0.499	0.246	8.20566e-07	Upregulated	HT vs HW	Endothelial cells
Chchd2	3.36473e-11	-0.431377	0.012	0.104	8.28463e-07	Downregulated	HT vs HW	Endothelial cells
Eif5a	3.40222e-11	-0.341675	0.012	0.104	8.37694e-07	Downregulated	HT vs HW	Endothelial cells
Map1lc3b	3.41729e-11	-0.235259	0.023	0.142	8.41405e-07	Stable	HT vs HW	Endothelial cells
Lamp2	3.42798e-11	-0.478599	0.05	0.209	8.44038e-07	Downregulated	HT vs HW	Endothelial cells
Atl3	3.5701e-11	-0.363782	0.129	0.381	8.79031e-07	Downregulated	HT vs HW	Endothelial cells
Dynll2	3.60456e-11	-0.378181	0.01	0.097	8.87514e-07	Downregulated	HT vs HW	Endothelial cells
Tanc2	3.73728e-11	-0.701526	0.429	0.754	9.20194e-07	Downregulated	HT vs HW	Endothelial cells
Fos	3.76724e-11	-0.265043	0.001	0.052	9.27569e-07	Downregulated	HT vs HW	Endothelial cells
Mgst1	3.76724e-11	-0.21292	0.001	0.052	9.27569e-07	Stable	HT vs HW	Endothelial cells
Pex13	3.77793e-11	-0.312744	0.01	0.097	9.30202e-07	Downregulated	HT vs HW	Endothelial cells
Cct7	3.7908e-11	-0.493869	0.019	0.127	9.33371e-07	Downregulated	HT vs HW	Endothelial cells
Scd1	3.8113e-11	-1.38115	0.059	0.224	9.38418e-07	Downregulated	HT vs HW	Endothelial cells
Pgm5	3.82835e-11	-0.155324	0.131	0.388	9.42616e-07	Stable	HT vs HW	Endothelial cells
Optn	3.83751e-11	-0.238827	0.01	0.097	9.44873e-07	Stable	HT vs HW	Endothelial cells
Rap1gap2	3.84261e-11	-0.324728	0.012	0.104	9.46127e-07	Downregulated	HT vs HW	Endothelial cells
Gm4876	3.86765e-11	-0.303623	0.01	0.097	9.52293e-07	Downregulated	HT vs HW	Endothelial cells
Ninj1	3.91912e-11	-0.158201	0.001	0.052	9.64966e-07	Stable	HT vs HW	Endothelial cells
Sigmar1	3.91912e-11	-0.163144	0.001	0.052	9.64966e-07	Stable	HT vs HW	Endothelial cells
Glul	3.99053e-11	-0.249207	0.01	0.097	9.82548e-07	Stable	HT vs HW	Endothelial cells
Flt4	4.03101e-11	-0.297116	0.061	0.239	9.92515e-07	Downregulated	HT vs HW	Endothelial cells
Trim28	4.0484e-11	-0.267746	0.014	0.112	9.96796e-07	Downregulated	HT vs HW	Endothelial cells
Mul1	4.077e-11	-0.152483	0.001	0.052	1.00384e-06	Stable	HT vs HW	Endothelial cells
Ampd2	4.11722e-11	-0.264785	0.01	0.097	1.01374e-06	Downregulated	HT vs HW	Endothelial cells
Pcolce	4.13099e-11	-0.216324	0.001	0.052	1.01713e-06	Stable	HT vs HW	Endothelial cells
Sort1	4.21482e-11	-0.168038	0.01	0.097	1.03777e-06	Stable	HT vs HW	Endothelial cells
Bcl9l	4.26509e-11	-0.195094	0.104	0.336	1.05015e-06	Stable	HT vs HW	Endothelial cells
Ckap4	4.31186e-11	-0.440528	0.019	0.127	1.06167e-06	Downregulated	HT vs HW	Endothelial cells
Adamts10	4.34806e-11	-0.324861	0.141	0.403	1.07058e-06	Downregulated	HT vs HW	Endothelial cells
Npnt	4.77355e-11	-0.563188	0.035	0.172	1.17534e-06	Downregulated	HT vs HW	Endothelial cells
Ppp1r12c	4.81755e-11	-0.276507	0.139	0.403	1.18618e-06	Downregulated	HT vs HW	Endothelial cells
Yap1	5.03435e-11	-0.392076	0.119	0.358	1.23956e-06	Downregulated	HT vs HW	Endothelial cells
Plekha6	5.11466e-11	-0.440771	0.029	0.157	1.25933e-06	Downregulated	HT vs HW	Endothelial cells
Vps36	5.15278e-11	-0.242158	0.079	0.276	1.26872e-06	Stable	HT vs HW	Endothelial cells
Gaa	5.15609e-11	-0.213289	0.005	0.075	1.26953e-06	Stable	HT vs HW	Endothelial cells
Tmem63a	5.19299e-11	-0.341838	0.037	0.179	1.27862e-06	Downregulated	HT vs HW	Endothelial cells
Hdlbp	5.30279e-11	-0.415487	0.105	0.328	1.30565e-06	Downregulated	HT vs HW	Endothelial cells
Tcp1	5.31921e-11	-0.303273	0.044	0.194	1.3097e-06	Downregulated	HT vs HW	Endothelial cells
Rbm15b	5.56692e-11	-0.296986	0.005	0.075	1.37069e-06	Downregulated	HT vs HW	Endothelial cells
Nat6	5.62048e-11	-0.200691	0.005	0.075	1.38387e-06	Stable	HT vs HW	Endothelial cells
Emg1	5.62513e-11	-0.293542	0.019	0.127	1.38502e-06	Downregulated	HT vs HW	Endothelial cells
Scrn1	5.64743e-11	-0.27679	0.005	0.075	1.39051e-06	Downregulated	HT vs HW	Endothelial cells
Aamp	5.72784e-11	-0.497764	0.024	0.142	1.41031e-06	Downregulated	HT vs HW	Endothelial cells
Epdr1	5.8098e-11	-0.474018	0.017	0.119	1.43049e-06	Downregulated	HT vs HW	Endothelial cells
Mecr	5.82701e-11	-0.32487	0.024	0.142	1.43473e-06	Downregulated	HT vs HW	Endothelial cells
Stk10	5.85201e-11	-0.280806	0.199	0.515	1.44088e-06	Downregulated	HT vs HW	Endothelial cells
Mnt	5.88389e-11	-0.259157	0.021	0.134	1.44873e-06	Downregulated	HT vs HW	Endothelial cells
App	6.1611e-11	-0.617162	0.482	0.851	1.51699e-06	Downregulated	HT vs HW	Endothelial cells
Syt7	6.54149e-11	-0.257862	0.079	0.276	1.61064e-06	Downregulated	HT vs HW	Endothelial cells
Nap1l4	6.67901e-11	-0.272106	0.119	0.358	1.64451e-06	Downregulated	HT vs HW	Endothelial cells
Cand1	6.84228e-11	-0.296588	0.066	0.246	1.68471e-06	Downregulated	HT vs HW	Endothelial cells
Adam9	7.5304e-11	-0.44137	0.058	0.224	1.85414e-06	Downregulated	HT vs HW	Endothelial cells
Snx18	7.71928e-11	-0.416338	0.054	0.216	1.90064e-06	Downregulated	HT vs HW	Endothelial cells
1810037I17Rik	7.84697e-11	-0.483726	0.022	0.134	1.93208e-06	Downregulated	HT vs HW	Endothelial cells
Rpl30	7.92804e-11	-0.199688	0.024	0.142	1.95204e-06	Stable	HT vs HW	Endothelial cells
Klhl28	8.04514e-11	-0.227121	0.047	0.201	1.98088e-06	Stable	HT vs HW	Endothelial cells
Adcy4	8.05327e-11	-0.158059	0.151	0.425	1.98288e-06	Stable	HT vs HW	Endothelial cells
Lnx1	8.09476e-11	1.69946	0.45	0.172	1.99309e-06	Upregulated	HT vs HW	Endothelial cells
Lrmda	8.2462e-11	-0.331639	0.214	0.522	2.03038e-06	Downregulated	HT vs HW	Endothelial cells
Tgfa	8.29578e-11	-0.504075	0.017	0.119	2.04259e-06	Downregulated	HT vs HW	Endothelial cells
Gk5	8.39354e-11	-0.325076	0.035	0.172	2.06666e-06	Downregulated	HT vs HW	Endothelial cells
Rab1b	8.62302e-11	-0.428532	0.017	0.119	2.12316e-06	Downregulated	HT vs HW	Endothelial cells
Nav2	8.65553e-11	-0.482238	0.139	0.388	2.13116e-06	Downregulated	HT vs HW	Endothelial cells
Casp12	8.88645e-11	-0.249553	0.077	0.269	2.18802e-06	Stable	HT vs HW	Endothelial cells
Rps15a	8.99036e-11	-0.346524	0.027	0.149	2.21361e-06	Downregulated	HT vs HW	Endothelial cells
Fundc2	9.07244e-11	-0.429117	0.007	0.082	2.23382e-06	Downregulated	HT vs HW	Endothelial cells
Cox7b	9.17195e-11	-0.366384	0.015	0.112	2.25832e-06	Downregulated	HT vs HW	Endothelial cells
Pcbd2	9.19306e-11	-0.356042	0.061	0.231	2.26352e-06	Downregulated	HT vs HW	Endothelial cells
Uhrf1bp1l	9.29472e-11	-0.303717	0.076	0.269	2.28855e-06	Downregulated	HT vs HW	Endothelial cells
Icam2	9.38715e-11	-0.331843	0.091	0.299	2.3113e-06	Downregulated	HT vs HW	Endothelial cells
Klhl13	9.47984e-11	-0.550932	0.04	0.179	2.33413e-06	Downregulated	HT vs HW	Endothelial cells
Mcrip1	9.6145e-11	-0.321697	0.045	0.194	2.36728e-06	Downregulated	HT vs HW	Endothelial cells
Dbt	9.97804e-11	-0.32433	0.007	0.082	2.45679e-06	Downregulated	HT vs HW	Endothelial cells
Slc26a2	9.97804e-11	-0.239843	0.007	0.082	2.45679e-06	Stable	HT vs HW	Endothelial cells
Vmp1	1.02956e-10	-0.375442	0.061	0.231	2.53498e-06	Downregulated	HT vs HW	Endothelial cells
Tcaf1	1.03475e-10	-0.430128	0.055	0.216	2.54775e-06	Downregulated	HT vs HW	Endothelial cells
Anxa7	1.05891e-10	-0.283775	0.121	0.358	2.60724e-06	Downregulated	HT vs HW	Endothelial cells
Sun2	1.06065e-10	-0.276119	0.027	0.149	2.61152e-06	Downregulated	HT vs HW	Endothelial cells
Zfp654	1.064e-10	-0.24045	0.094	0.306	2.61977e-06	Stable	HT vs HW	Endothelial cells
Uggt2	1.07796e-10	-0.270383	0.015	0.112	2.65416e-06	Downregulated	HT vs HW	Endothelial cells
Cadm1	1.09984e-10	-0.393908	0.045	0.194	2.70803e-06	Downregulated	HT vs HW	Endothelial cells
Abtb2	1.10668e-10	-0.250554	0.007	0.082	2.72487e-06	Downregulated	HT vs HW	Endothelial cells
Clybl	1.10668e-10	-0.375227	0.007	0.082	2.72487e-06	Downregulated	HT vs HW	Endothelial cells
Hbegf	1.10668e-10	-0.341656	0.007	0.082	2.72487e-06	Downregulated	HT vs HW	Endothelial cells
Psmb1	1.19002e-10	-0.540012	0.053	0.209	2.93006e-06	Downregulated	HT vs HW	Endothelial cells
Tmem38b	1.21663e-10	-0.183433	0.007	0.082	2.9956e-06	Stable	HT vs HW	Endothelial cells
Slc7a1	1.22328e-10	-0.360153	0.055	0.216	3.01195e-06	Downregulated	HT vs HW	Endothelial cells
Col3a1	1.22701e-10	-1.03087	0.011	0.097	3.02115e-06	Downregulated	HT vs HW	Endothelial cells
Smim7	1.22794e-10	-0.311404	0.013	0.104	3.02342e-06	Downregulated	HT vs HW	Endothelial cells
Aes	1.2416e-10	-0.468224	0.043	0.187	3.05707e-06	Downregulated	HT vs HW	Endothelial cells
Edem1	1.26144e-10	-0.356393	0.02	0.127	3.10591e-06	Downregulated	HT vs HW	Endothelial cells
Cabp1	1.28767e-10	-0.449557	0.043	0.187	3.17051e-06	Downregulated	HT vs HW	Endothelial cells
Snx7	1.30881e-10	-0.490166	0.028	0.149	3.22256e-06	Downregulated	HT vs HW	Endothelial cells
Cmss1	1.32127e-10	-1.22216	0.203	0.448	3.25324e-06	Downregulated	HT vs HW	Endothelial cells
Zfp655	1.3318e-10	-0.346577	0.03	0.157	3.27916e-06	Downregulated	HT vs HW	Endothelial cells
Arfgap3	1.35457e-10	-0.415081	0.052	0.209	3.33521e-06	Downregulated	HT vs HW	Endothelial cells
Parm1	1.36805e-10	-0.383258	0.009	0.09	3.36842e-06	Downregulated	HT vs HW	Endothelial cells
Nrbf2	1.39805e-10	-0.35547	0.011	0.097	3.44228e-06	Downregulated	HT vs HW	Endothelial cells
Wbp1l	1.40484e-10	-0.298237	0.2	0.507	3.45899e-06	Downregulated	HT vs HW	Endothelial cells
Ndufb10	1.41376e-10	-0.293122	0.011	0.097	3.48095e-06	Downregulated	HT vs HW	Endothelial cells
Itgb1	1.43713e-10	-0.537001	0.379	0.769	3.53851e-06	Downregulated	HT vs HW	Endothelial cells
Orai1	1.45817e-10	-0.501232	0.066	0.239	3.5903e-06	Downregulated	HT vs HW	Endothelial cells
Slc12a8	1.47442e-10	-0.388923	0.013	0.104	3.63033e-06	Downregulated	HT vs HW	Endothelial cells
Syvn1	1.493e-10	-0.239158	0.009	0.09	3.67607e-06	Stable	HT vs HW	Endothelial cells
Blmh	1.50149e-10	-0.296542	0.064	0.239	3.69696e-06	Downregulated	HT vs HW	Endothelial cells
Fam69a	1.50763e-10	-0.348285	0.129	0.373	3.7121e-06	Downregulated	HT vs HW	Endothelial cells
B4gat1	1.54641e-10	-0.274841	0.004	0.067	3.80758e-06	Downregulated	HT vs HW	Endothelial cells
Steap4	1.54641e-10	-0.461925	0.004	0.067	3.80758e-06	Downregulated	HT vs HW	Endothelial cells
Creld1	1.55736e-10	-0.245562	0.015	0.112	3.83454e-06	Stable	HT vs HW	Endothelial cells
Fbxl7	1.57685e-10	1.34625	0.729	0.672	3.88253e-06	Upregulated	HT vs HW	Endothelial cells
Slc23a2	1.57697e-10	-0.476576	0.134	0.373	3.88282e-06	Downregulated	HT vs HW	Endothelial cells
Kctd20	1.58508e-10	-0.150796	0.067	0.246	3.90278e-06	Stable	HT vs HW	Endothelial cells
Ccdc47	1.59922e-10	-0.280337	0.061	0.231	3.9376e-06	Downregulated	HT vs HW	Endothelial cells
Prkag2	1.60271e-10	-0.544552	0.159	0.418	3.94619e-06	Downregulated	HT vs HW	Endothelial cells
Prkar1a	1.62167e-10	-0.379996	0.116	0.343	3.99288e-06	Downregulated	HT vs HW	Endothelial cells
Mrpl28	1.62602e-10	-0.288617	0.004	0.067	4.00358e-06	Downregulated	HT vs HW	Endothelial cells
Chtf8	1.62605e-10	-0.119178	0.039	0.179	4.00367e-06	Stable	HT vs HW	Endothelial cells
Gm11266	1.63419e-10	-0.191739	0.004	0.067	4.0237e-06	Stable	HT vs HW	Endothelial cells
Tubb4b	1.64241e-10	-0.425734	0.004	0.067	4.04394e-06	Downregulated	HT vs HW	Endothelial cells
Xpo1	1.65352e-10	-0.376287	0.11	0.336	4.07129e-06	Downregulated	HT vs HW	Endothelial cells
Tpm4	1.66492e-10	-0.215912	0.128	0.373	4.09937e-06	Stable	HT vs HW	Endothelial cells
Rcn3	1.72683e-10	-0.199553	0.004	0.067	4.25181e-06	Stable	HT vs HW	Endothelial cells
Sgcz	1.72683e-10	-0.21705	0.004	0.067	4.25181e-06	Stable	HT vs HW	Endothelial cells
Bcl2l13	1.74937e-10	-0.244255	0.009	0.09	4.3073e-06	Stable	HT vs HW	Endothelial cells
Slc25a37	1.7569e-10	-0.355239	0.02	0.127	4.32583e-06	Downregulated	HT vs HW	Endothelial cells
Fads3	1.77951e-10	-0.23113	0.004	0.067	4.3815e-06	Stable	HT vs HW	Endothelial cells
Heg1	1.81279e-10	-0.726538	0.715	0.925	4.46344e-06	Downregulated	HT vs HW	Endothelial cells
Stk32b	1.81549e-10	-0.212568	0.004	0.067	4.4701e-06	Stable	HT vs HW	Endothelial cells
Romo1	1.83375e-10	-0.228892	0.004	0.067	4.51506e-06	Stable	HT vs HW	Endothelial cells
Gusb	1.85219e-10	-0.153317	0.004	0.067	4.56045e-06	Stable	HT vs HW	Endothelial cells
Cry2	1.85903e-10	-0.281168	0.043	0.187	4.5773e-06	Downregulated	HT vs HW	Endothelial cells
Wwp2	2.03704e-10	-0.366599	0.14	0.388	5.0156e-06	Downregulated	HT vs HW	Endothelial cells
Eif4g2	2.12139e-10	-0.600885	0.171	0.433	5.22328e-06	Downregulated	HT vs HW	Endothelial cells
Trappc6b	2.15129e-10	-0.229244	0.078	0.269	5.29691e-06	Stable	HT vs HW	Endothelial cells
Arl4a	2.15843e-10	-0.246121	0.018	0.119	5.31449e-06	Stable	HT vs HW	Endothelial cells
Uso1	2.19656e-10	-0.249723	0.099	0.313	5.40838e-06	Stable	HT vs HW	Endothelial cells
Spg7	2.22661e-10	-0.429576	0.018	0.119	5.48236e-06	Downregulated	HT vs HW	Endothelial cells
Arf4	2.2315e-10	-0.283117	0.109	0.336	5.49439e-06	Downregulated	HT vs HW	Endothelial cells
Tmem106b	2.24519e-10	-0.396056	0.034	0.164	5.5281e-06	Downregulated	HT vs HW	Endothelial cells
Fbxo22	2.2825e-10	-0.301107	0.028	0.149	5.61998e-06	Downregulated	HT vs HW	Endothelial cells
Nhsl2	2.28858e-10	-0.512015	0.308	0.657	5.63494e-06	Downregulated	HT vs HW	Endothelial cells
AI838599	2.30404e-10	-0.374691	0.018	0.119	5.673e-06	Downregulated	HT vs HW	Endothelial cells
Mid1	2.35588e-10	-0.499233	0.114	0.336	5.80064e-06	Downregulated	HT vs HW	Endothelial cells
Lysmd2	2.44566e-10	-0.374671	0.034	0.164	6.02171e-06	Downregulated	HT vs HW	Endothelial cells
Tnks	2.46496e-10	-0.277744	0.172	0.455	6.06923e-06	Downregulated	HT vs HW	Endothelial cells
Eva1c	2.58328e-10	-0.507797	0.1	0.306	6.36056e-06	Downregulated	HT vs HW	Endothelial cells
Capn2	2.63437e-10	-0.324829	0.164	0.44	6.48634e-06	Downregulated	HT vs HW	Endothelial cells
Erp44	2.65919e-10	-0.330422	0.1	0.313	6.54745e-06	Downregulated	HT vs HW	Endothelial cells
Fhit	2.66893e-10	-0.668797	0.051	0.201	6.57144e-06	Downregulated	HT vs HW	Endothelial cells
Trove2	2.6987e-10	-0.216286	0.052	0.209	6.64475e-06	Stable	HT vs HW	Endothelial cells
Ppp1r15b	2.75354e-10	-0.2984	0.023	0.134	6.77978e-06	Downregulated	HT vs HW	Endothelial cells
Palld	2.78668e-10	-0.450311	0.27	0.597	6.86137e-06	Downregulated	HT vs HW	Endothelial cells
Spon1	2.81927e-10	-0.282778	0.056	0.216	6.94159e-06	Downregulated	HT vs HW	Endothelial cells
Pfdn2	2.82692e-10	-0.259912	0.018	0.119	6.96045e-06	Downregulated	HT vs HW	Endothelial cells
Prkca	2.83085e-10	-0.450045	0.05	0.201	6.97013e-06	Downregulated	HT vs HW	Endothelial cells
Npdc1	2.84571e-10	-0.165199	0.031	0.157	7.00671e-06	Stable	HT vs HW	Endothelial cells
BC003331	2.87156e-10	-0.242178	0.065	0.239	7.07036e-06	Stable	HT vs HW	Endothelial cells
Tmem184b	2.87618e-10	-0.205963	0.232	0.567	7.08173e-06	Stable	HT vs HW	Endothelial cells
Ago2	2.95301e-10	-0.351719	0.132	0.373	7.27089e-06	Downregulated	HT vs HW	Endothelial cells
Klhl6	3.00299e-10	-0.492326	0.021	0.127	7.39395e-06	Downregulated	HT vs HW	Endothelial cells
Ctage5	3.07121e-10	-0.269895	0.178	0.47	7.56192e-06	Downregulated	HT vs HW	Endothelial cells
Plekhf2	3.09393e-10	-0.197182	0.028	0.149	7.61787e-06	Stable	HT vs HW	Endothelial cells
Gm12185	3.15015e-10	-0.365831	0.034	0.164	7.75629e-06	Downregulated	HT vs HW	Endothelial cells
Zadh2	3.23256e-10	-0.338272	0.073	0.254	7.95921e-06	Downregulated	HT vs HW	Endothelial cells
Gm12940	3.31051e-10	-0.217655	0.059	0.224	8.15113e-06	Stable	HT vs HW	Endothelial cells
Pdlim1	3.45314e-10	-0.152877	0.199	0.5	8.50232e-06	Stable	HT vs HW	Endothelial cells
Amotl2	3.48382e-10	-0.306207	0.091	0.291	8.57786e-06	Downregulated	HT vs HW	Endothelial cells
Apobec1	3.49883e-10	-0.310925	0.016	0.112	8.61483e-06	Downregulated	HT vs HW	Endothelial cells
Rps26	3.62567e-10	-0.374098	0.006	0.075	8.92712e-06	Downregulated	HT vs HW	Endothelial cells
Dusp8	3.63036e-10	-0.422801	0.021	0.127	8.93868e-06	Downregulated	HT vs HW	Endothelial cells
Igfbp3	3.80497e-10	-0.859403	0.039	0.172	9.3686e-06	Downregulated	HT vs HW	Endothelial cells
Ahnak2	3.8072e-10	-0.211743	0.006	0.075	9.37408e-06	Stable	HT vs HW	Endothelial cells
Pgls	4.03321e-10	-0.236532	0.006	0.075	9.93057e-06	Stable	HT vs HW	Endothelial cells
Pdzd2	4.07269e-10	1.36745	0.637	0.493	1.00278e-05	Upregulated	HT vs HW	Endothelial cells
Arpc2	4.15433e-10	-0.480441	0.2	0.485	1.02288e-05	Downregulated	HT vs HW	Endothelial cells
Ifi27	4.17874e-10	-0.212443	0.006	0.075	1.02889e-05	Stable	HT vs HW	Endothelial cells
Flot1	4.1849e-10	-0.30529	0.014	0.104	1.03041e-05	Downregulated	HT vs HW	Endothelial cells
Mfsd6	4.21153e-10	-0.253294	0.079	0.269	1.03696e-05	Downregulated	HT vs HW	Endothelial cells
Ddi2	4.26033e-10	-0.328258	0.128	0.366	1.04898e-05	Downregulated	HT vs HW	Endothelial cells
Foxc1	4.31082e-10	-0.422278	0.035	0.164	1.06141e-05	Downregulated	HT vs HW	Endothelial cells
Agrn	4.42362e-10	-0.262046	0.053	0.209	1.08918e-05	Downregulated	HT vs HW	Endothelial cells
Parp3	4.46808e-10	-0.136656	0.003	0.06	1.10013e-05	Stable	HT vs HW	Endothelial cells
Tmbim4	4.48649e-10	-0.342183	0.032	0.157	1.10466e-05	Downregulated	HT vs HW	Endothelial cells
Sgta	4.49116e-10	-0.23591	0.014	0.104	1.10581e-05	Stable	HT vs HW	Endothelial cells
Gclm	4.5049e-10	-0.453655	0.042	0.179	1.1092e-05	Downregulated	HT vs HW	Endothelial cells
Kctd15	4.56417e-10	-0.232278	0.003	0.06	1.12379e-05	Stable	HT vs HW	Endothelial cells
St3gal2	4.58952e-10	-0.348019	0.092	0.291	1.13003e-05	Downregulated	HT vs HW	Endothelial cells
Smpd1	4.6059e-10	-0.150533	0.006	0.075	1.13407e-05	Stable	HT vs HW	Endothelial cells
Fam214b	4.60767e-10	-0.285653	0.047	0.194	1.1345e-05	Downregulated	HT vs HW	Endothelial cells
Hfe	4.61298e-10	-0.225883	0.003	0.06	1.13581e-05	Stable	HT vs HW	Endothelial cells
Serac1	4.62031e-10	-0.336203	0.012	0.097	1.13761e-05	Downregulated	HT vs HW	Endothelial cells
Ube3a	4.67088e-10	-0.31332	0.258	0.612	1.15006e-05	Downregulated	HT vs HW	Endothelial cells
Nceh1	4.71211e-10	-0.195786	0.003	0.06	1.16022e-05	Stable	HT vs HW	Endothelial cells
Dmd	4.73583e-10	-0.379734	0.22	0.53	1.16606e-05	Downregulated	HT vs HW	Endothelial cells
Psmb6	4.76246e-10	-0.202958	0.003	0.06	1.17261e-05	Stable	HT vs HW	Endothelial cells
Unc93b1	4.81333e-10	-0.170114	0.003	0.06	1.18514e-05	Stable	HT vs HW	Endothelial cells
Fgfr3	4.88244e-10	-0.379453	0.051	0.201	1.20215e-05	Downregulated	HT vs HW	Endothelial cells
Klk11	4.96915e-10	-0.158127	0.003	0.06	1.2235e-05	Stable	HT vs HW	Endothelial cells
Metap1	5.099e-10	-0.39897	0.051	0.201	1.25548e-05	Downregulated	HT vs HW	Endothelial cells
Gprc5a	5.13827e-10	-0.325439	0.032	0.157	1.26514e-05	Downregulated	HT vs HW	Endothelial cells
Rpl35	5.17521e-10	-0.302116	0.012	0.097	1.27424e-05	Downregulated	HT vs HW	Endothelial cells
Dync1h1	5.17976e-10	-0.277306	0.242	0.597	1.27536e-05	Downregulated	HT vs HW	Endothelial cells
Samd4b	5.18688e-10	-0.283651	0.06	0.224	1.27711e-05	Downregulated	HT vs HW	Endothelial cells
Tmem208	5.29503e-10	-0.352028	0.039	0.172	1.30374e-05	Downregulated	HT vs HW	Endothelial cells
Gde1	5.3238e-10	-0.360495	0.012	0.097	1.31083e-05	Downregulated	HT vs HW	Endothelial cells
Lactb2	5.39045e-10	-0.315191	0.024	0.134	1.32724e-05	Downregulated	HT vs HW	Endothelial cells
Trim56	5.43562e-10	-0.298552	0.067	0.239	1.33836e-05	Downregulated	HT vs HW	Endothelial cells
Fat1	5.45004e-10	-0.482904	0.024	0.134	1.34191e-05	Downregulated	HT vs HW	Endothelial cells
Rhbdf2	5.49244e-10	-0.384861	0.064	0.231	1.35235e-05	Downregulated	HT vs HW	Endothelial cells
Pld1	5.50852e-10	-0.358728	0.208	0.5	1.35631e-05	Downregulated	HT vs HW	Endothelial cells
Kars	5.51016e-10	-0.308592	0.014	0.104	1.35671e-05	Downregulated	HT vs HW	Endothelial cells
Zdhhc5	5.61399e-10	-0.354118	0.032	0.157	1.38228e-05	Downregulated	HT vs HW	Endothelial cells
Ndufv2	5.62482e-10	-0.280859	0.054	0.209	1.38494e-05	Downregulated	HT vs HW	Endothelial cells
Golph3	5.64204e-10	-0.255089	0.087	0.284	1.38918e-05	Downregulated	HT vs HW	Endothelial cells
Sh3kbp1	5.67734e-10	-0.403645	0.112	0.328	1.39787e-05	Downregulated	HT vs HW	Endothelial cells
Lrrc8a	5.69036e-10	-0.332012	0.057	0.216	1.40108e-05	Downregulated	HT vs HW	Endothelial cells
Grik5	5.69745e-10	-0.206977	0.014	0.104	1.40283e-05	Stable	HT vs HW	Endothelial cells
Itih5	6.22281e-10	-0.338819	0.01	0.09	1.53218e-05	Downregulated	HT vs HW	Endothelial cells
Csnk2a1	6.30844e-10	-0.231381	0.14	0.388	1.55326e-05	Stable	HT vs HW	Endothelial cells
Slc16a9	6.36e-10	-0.194165	0.008	0.082	1.56596e-05	Stable	HT vs HW	Endothelial cells
Pgrmc1	6.51557e-10	-0.151586	0.008	0.082	1.60426e-05	Stable	HT vs HW	Endothelial cells
Edn1	6.54342e-10	-0.393946	0.149	0.396	1.61112e-05	Downregulated	HT vs HW	Endothelial cells
Lama5	6.58351e-10	-0.240107	0.136	0.381	1.62099e-05	Stable	HT vs HW	Endothelial cells
Snx30	6.79034e-10	-0.379563	0.049	0.194	1.67192e-05	Downregulated	HT vs HW	Endothelial cells
Tatdn2	6.85951e-10	-0.188571	0.01	0.09	1.68895e-05	Stable	HT vs HW	Endothelial cells
Tram1	6.95574e-10	-0.241279	0.067	0.239	1.71264e-05	Stable	HT vs HW	Endothelial cells
Adam15	7.52782e-10	-0.471256	0.233	0.537	1.8535e-05	Downregulated	HT vs HW	Endothelial cells
Gmds	7.81648e-10	-0.281948	0.308	0.679	1.92457e-05	Downregulated	HT vs HW	Endothelial cells
Fam198b	7.95222e-10	-0.436552	0.214	0.507	1.958e-05	Downregulated	HT vs HW	Endothelial cells
Acvr1	7.96729e-10	-0.205671	0.196	0.493	1.96171e-05	Stable	HT vs HW	Endothelial cells
Tpd52	8.31876e-10	-0.4287	0.033	0.157	2.04824e-05	Downregulated	HT vs HW	Endothelial cells
Clic1	8.44272e-10	-0.299073	0.123	0.351	2.07877e-05	Downregulated	HT vs HW	Endothelial cells
Cdipt	8.52711e-10	-0.469158	0.036	0.164	2.09954e-05	Downregulated	HT vs HW	Endothelial cells
Zyg11b	8.6318e-10	-0.310394	0.088	0.284	2.12532e-05	Downregulated	HT vs HW	Endothelial cells
Trappc12	8.82811e-10	-0.470533	0.049	0.194	2.17366e-05	Downregulated	HT vs HW	Endothelial cells
Ylpm1	8.90376e-10	-0.373742	0.176	0.448	2.19228e-05	Downregulated	HT vs HW	Endothelial cells
Irf2bp2	8.98372e-10	-0.293872	0.082	0.269	2.21197e-05	Downregulated	HT vs HW	Endothelial cells
Tank	8.99346e-10	-0.236679	0.058	0.216	2.21437e-05	Stable	HT vs HW	Endothelial cells
Vps29	9.08543e-10	-0.406039	0.046	0.187	2.23702e-05	Downregulated	HT vs HW	Endothelial cells
Rab11fip5	9.08839e-10	-0.348749	0.049	0.194	2.23774e-05	Downregulated	HT vs HW	Endothelial cells
Hoxb6	9.14876e-10	-0.226198	0.241	0.575	2.25261e-05	Stable	HT vs HW	Endothelial cells
Atad1	9.20427e-10	-0.238593	0.051	0.201	2.26627e-05	Stable	HT vs HW	Endothelial cells
Aup1	9.98298e-10	-0.156939	0.002	0.052	2.45801e-05	Stable	HT vs HW	Endothelial cells
Nt5c3	1.00399e-09	-0.319899	0.04	0.172	2.47203e-05	Downregulated	HT vs HW	Endothelial cells
Glrx5	1.00987e-09	-0.255493	0.002	0.052	2.4865e-05	Downregulated	HT vs HW	Endothelial cells
Slc25a1	1.00987e-09	-0.386185	0.002	0.052	2.4865e-05	Downregulated	HT vs HW	Endothelial cells
Gm6634	1.02157e-09	-0.303634	0.002	0.052	2.51532e-05	Downregulated	HT vs HW	Endothelial cells
Creb3l2	1.02955e-09	-0.225294	0.225	0.545	2.53496e-05	Stable	HT vs HW	Endothelial cells
Adrb2	1.06972e-09	-0.141989	0.002	0.052	2.63387e-05	Stable	HT vs HW	Endothelial cells
Icmt	1.07064e-09	-0.198279	0.017	0.112	2.63614e-05	Stable	HT vs HW	Endothelial cells
Emilin1	1.07182e-09	-0.258137	0.022	0.127	2.63903e-05	Downregulated	HT vs HW	Endothelial cells
Slc30a7	1.07245e-09	-0.0586481	0.112	0.336	2.6406e-05	Stable	HT vs HW	Endothelial cells
Gnai2	1.08613e-09	-0.417236	0.249	0.567	2.67427e-05	Downregulated	HT vs HW	Endothelial cells
Eef1a1	1.09087e-09	-0.559733	0.075	0.246	2.68595e-05	Downregulated	HT vs HW	Endothelial cells
BC031181	1.09394e-09	-0.361545	0.015	0.104	2.69351e-05	Downregulated	HT vs HW	Endothelial cells
Tm7sf3	1.09938e-09	-0.328149	0.033	0.157	2.7069e-05	Downregulated	HT vs HW	Endothelial cells
Dpy19l1	1.10282e-09	-0.30376	0.052	0.201	2.71537e-05	Downregulated	HT vs HW	Endothelial cells
Enpp4	1.12015e-09	-0.41453	0.067	0.231	2.75803e-05	Downregulated	HT vs HW	Endothelial cells
Mindy3	1.12522e-09	-0.38277	0.119	0.336	2.77051e-05	Downregulated	HT vs HW	Endothelial cells
Arhgap23	1.15224e-09	-0.448739	0.306	0.649	2.83704e-05	Downregulated	HT vs HW	Endothelial cells
Erlin2	1.16231e-09	-0.278944	0.03	0.149	2.86184e-05	Downregulated	HT vs HW	Endothelial cells
Ldlrad4	1.1711e-09	-0.639818	0.488	0.799	2.88348e-05	Downregulated	HT vs HW	Endothelial cells
Glud1	1.17938e-09	-0.347087	0.164	0.425	2.90386e-05	Downregulated	HT vs HW	Endothelial cells
Acads	1.215e-09	-0.132029	0	0.037	2.99157e-05	Stable	HT vs HW	Endothelial cells
Acvr1c	1.215e-09	-0.185933	0	0.037	2.99157e-05	Stable	HT vs HW	Endothelial cells
Ccl2	1.215e-09	-0.299799	0	0.037	2.99157e-05	Downregulated	HT vs HW	Endothelial cells
Dmac1	1.215e-09	-0.190568	0	0.037	2.99157e-05	Stable	HT vs HW	Endothelial cells
Flnc	1.215e-09	-0.354971	0	0.037	2.99157e-05	Downregulated	HT vs HW	Endothelial cells
Gys1	1.215e-09	-0.116707	0	0.037	2.99157e-05	Stable	HT vs HW	Endothelial cells
Insig1	1.215e-09	-0.269183	0	0.037	2.99157e-05	Downregulated	HT vs HW	Endothelial cells
Jph1	1.215e-09	-0.130103	0	0.037	2.99157e-05	Stable	HT vs HW	Endothelial cells
Maged1	1.215e-09	-0.126831	0	0.037	2.99157e-05	Stable	HT vs HW	Endothelial cells
Mfsd4b4	1.215e-09	-0.115641	0	0.037	2.99157e-05	Stable	HT vs HW	Endothelial cells
Neb	1.215e-09	-1.08257	0	0.037	2.99157e-05	Downregulated	HT vs HW	Endothelial cells
Ogn	1.215e-09	-0.167692	0	0.037	2.99157e-05	Stable	HT vs HW	Endothelial cells
S100a4	1.215e-09	-0.143987	0	0.037	2.99157e-05	Stable	HT vs HW	Endothelial cells
Uqcrfs1	1.215e-09	-0.124944	0	0.037	2.99157e-05	Stable	HT vs HW	Endothelial cells
Lfng	1.23205e-09	-0.424982	0.028	0.142	3.03356e-05	Downregulated	HT vs HW	Endothelial cells
Far1	1.23624e-09	-0.276932	0.151	0.403	3.04388e-05	Downregulated	HT vs HW	Endothelial cells
Pdlim5	1.24157e-09	-0.530804	0.459	0.813	3.057e-05	Downregulated	HT vs HW	Endothelial cells
Dll1	1.24883e-09	-0.284266	0.046	0.187	3.07488e-05	Downregulated	HT vs HW	Endothelial cells
Gjc1	1.27011e-09	-0.290899	0.049	0.194	3.12727e-05	Downregulated	HT vs HW	Endothelial cells
Eif1a	1.27272e-09	-0.33332	0.025	0.134	3.1337e-05	Downregulated	HT vs HW	Endothelial cells
Adamts6	1.2832e-09	-0.658015	0.064	0.224	3.15949e-05	Downregulated	HT vs HW	Endothelial cells
Flna	1.3538e-09	-0.474099	0.156	0.403	3.33332e-05	Downregulated	HT vs HW	Endothelial cells
Eif3g	1.35684e-09	-0.200291	0.005	0.067	3.34082e-05	Stable	HT vs HW	Endothelial cells
Akr7a5	1.36937e-09	-0.273397	0.005	0.067	3.37166e-05	Downregulated	HT vs HW	Endothelial cells
Yif1b	1.36937e-09	-0.236343	0.005	0.067	3.37166e-05	Stable	HT vs HW	Endothelial cells
Amy1	1.38234e-09	-0.354416	0.053	0.201	3.4036e-05	Downregulated	HT vs HW	Endothelial cells
Szrd1	1.40612e-09	-0.189281	0.066	0.231	3.46214e-05	Stable	HT vs HW	Endothelial cells
Atp6v1f	1.42062e-09	-0.212811	0.005	0.067	3.49785e-05	Stable	HT vs HW	Endothelial cells
Cln5	1.42062e-09	-0.271155	0.005	0.067	3.49785e-05	Downregulated	HT vs HW	Endothelial cells
Hnrnpul2	1.43994e-09	-0.278149	0.091	0.284	3.54541e-05	Downregulated	HT vs HW	Endothelial cells
Pmpcb	1.48539e-09	-0.290764	0.015	0.104	3.65733e-05	Downregulated	HT vs HW	Endothelial cells
Rce1	1.50101e-09	-0.189982	0.005	0.067	3.69579e-05	Stable	HT vs HW	Endothelial cells
Nolc1	1.52399e-09	-0.307531	0.015	0.104	3.75236e-05	Downregulated	HT vs HW	Endothelial cells
Rbpj	1.52399e-09	-0.311332	0.015	0.104	3.75236e-05	Downregulated	HT vs HW	Endothelial cells
Enpp2	1.52878e-09	-0.200126	0.005	0.067	3.76417e-05	Stable	HT vs HW	Endothelial cells
Ebp	1.54286e-09	-0.154717	0.005	0.067	3.79882e-05	Stable	HT vs HW	Endothelial cells
Spryd7	1.55705e-09	-0.173093	0.005	0.067	3.83378e-05	Stable	HT vs HW	Endothelial cells
Uqcrb	1.57138e-09	-0.160834	0.005	0.067	3.86905e-05	Stable	HT vs HW	Endothelial cells
Dgat2	1.59237e-09	-0.173744	0.001	0.045	3.92075e-05	Stable	HT vs HW	Endothelial cells
Ddx1	1.60289e-09	-0.170111	0.043	0.179	3.94663e-05	Stable	HT vs HW	Endothelial cells
Lpl	1.63014e-09	-1.54289	0.036	0.157	4.01373e-05	Downregulated	HT vs HW	Endothelial cells
Ccnd1	1.64217e-09	-0.250268	0.028	0.142	4.04335e-05	Downregulated	HT vs HW	Endothelial cells
Dnm1	1.67668e-09	-0.199493	0.001	0.045	4.12832e-05	Stable	HT vs HW	Endothelial cells
Dpm3	1.67668e-09	-0.116217	0.001	0.045	4.12832e-05	Stable	HT vs HW	Endothelial cells
Snhg3	1.67668e-09	-0.147741	0.001	0.045	4.12832e-05	Stable	HT vs HW	Endothelial cells
Blcap	1.69843e-09	-0.111265	0.001	0.045	4.18187e-05	Stable	HT vs HW	Endothelial cells
Foxc2	1.69843e-09	-0.170905	0.001	0.045	4.18187e-05	Stable	HT vs HW	Endothelial cells
Unc13d	1.69843e-09	-0.168423	0.001	0.045	4.18187e-05	Stable	HT vs HW	Endothelial cells
Dstn	1.70462e-09	-0.344237	0.057	0.209	4.19711e-05	Downregulated	HT vs HW	Endothelial cells
Ppp3r1	1.72399e-09	-0.430542	0.041	0.172	4.2448e-05	Downregulated	HT vs HW	Endothelial cells
Kdelc2	1.76562e-09	-0.204707	0.015	0.104	4.34731e-05	Stable	HT vs HW	Endothelial cells
Uqcrc2	1.76871e-09	-0.298217	0.063	0.224	4.35491e-05	Downregulated	HT vs HW	Endothelial cells
Rbp1	1.77597e-09	-0.25633	0.02	0.119	4.37279e-05	Downregulated	HT vs HW	Endothelial cells
Sec23a	1.81888e-09	-0.173753	0.079	0.261	4.47843e-05	Stable	HT vs HW	Endothelial cells
Mut	1.8756e-09	-0.251384	0.02	0.119	4.6181e-05	Downregulated	HT vs HW	Endothelial cells
2510009E07Rik	1.87964e-09	-0.243132	0.063	0.224	4.62805e-05	Stable	HT vs HW	Endothelial cells
Gnl1	1.9183e-09	-0.171198	0.015	0.104	4.72325e-05	Stable	HT vs HW	Endothelial cells
Tmx3	1.95599e-09	-0.258627	0.142	0.381	4.81603e-05	Downregulated	HT vs HW	Endothelial cells
Alg11	1.97011e-09	-0.222243	0.007	0.075	4.8508e-05	Stable	HT vs HW	Endothelial cells
Uqcr11	2.0196e-09	-0.383705	0.007	0.075	4.97267e-05	Downregulated	HT vs HW	Endothelial cells
Adat1	2.03046e-09	-0.255407	0.028	0.142	4.99939e-05	Downregulated	HT vs HW	Endothelial cells
Atraid	2.0385e-09	-0.228024	0.011	0.09	5.01919e-05	Stable	HT vs HW	Endothelial cells
Dnmt3a	2.04303e-09	-0.406068	0.223	0.522	5.03035e-05	Downregulated	HT vs HW	Endothelial cells
Pcca	2.10519e-09	-0.453172	0.076	0.246	5.18341e-05	Downregulated	HT vs HW	Endothelial cells
Atxn7l3b	2.12841e-09	-0.368107	0.061	0.216	5.24058e-05	Downregulated	HT vs HW	Endothelial cells
Pwwp2a	2.22106e-09	-0.256511	0.13	0.358	5.46869e-05	Downregulated	HT vs HW	Endothelial cells
Vdac2	2.23346e-09	-0.316186	0.041	0.172	5.49924e-05	Downregulated	HT vs HW	Endothelial cells
Gm20532	2.26248e-09	-0.199382	0.028	0.142	5.57067e-05	Stable	HT vs HW	Endothelial cells
Pttg1	2.28736e-09	-0.333155	0.009	0.082	5.63194e-05	Downregulated	HT vs HW	Endothelial cells
Ube3b	2.29138e-09	-0.213176	0.066	0.231	5.64182e-05	Stable	HT vs HW	Endothelial cells
Tnfrsf26	2.30981e-09	-0.267235	0.037	0.164	5.68721e-05	Downregulated	HT vs HW	Endothelial cells
Mief1	2.34814e-09	-0.329114	0.023	0.127	5.7816e-05	Downregulated	HT vs HW	Endothelial cells
Selenot	2.37859e-09	-0.23281	0.05	0.194	5.85656e-05	Stable	HT vs HW	Endothelial cells
Ell2	2.38194e-09	-0.175859	0.007	0.075	5.86481e-05	Stable	HT vs HW	Endothelial cells
Smurf1	2.386e-09	-0.334682	0.222	0.522	5.87481e-05	Downregulated	HT vs HW	Endothelial cells
Capzb	2.40017e-09	-0.146445	0.21	0.515	5.90969e-05	Stable	HT vs HW	Endothelial cells
Atp8b1	2.42695e-09	-0.553021	0.263	0.567	5.97564e-05	Downregulated	HT vs HW	Endothelial cells
Klf8	2.43007e-09	-0.409136	0.086	0.269	5.98332e-05	Downregulated	HT vs HW	Endothelial cells
Rac1	2.43661e-09	-0.493622	0.171	0.418	5.99942e-05	Downregulated	HT vs HW	Endothelial cells
Pfkfb3	2.45235e-09	-0.20157	0.011	0.09	6.03817e-05	Stable	HT vs HW	Endothelial cells
Gpx4	2.4698e-09	-0.303757	0.011	0.09	6.08114e-05	Downregulated	HT vs HW	Endothelial cells
Ube2g2	2.52314e-09	-0.207352	0.007	0.075	6.21247e-05	Stable	HT vs HW	Endothelial cells
Rras2	2.52972e-09	-0.292348	0.077	0.254	6.22867e-05	Downregulated	HT vs HW	Endothelial cells
Hoxd8	2.55602e-09	-0.261124	0.037	0.164	6.29342e-05	Downregulated	HT vs HW	Endothelial cells
Ndufv3	2.56347e-09	-0.311205	0.009	0.082	6.31177e-05	Downregulated	HT vs HW	Endothelial cells
Golm1	2.56351e-09	-0.282559	0.051	0.194	6.31188e-05	Downregulated	HT vs HW	Endothelial cells
Ttc37	2.63527e-09	-0.332088	0.082	0.261	6.48855e-05	Downregulated	HT vs HW	Endothelial cells
Frmd5	2.64242e-09	-0.452529	0.009	0.082	6.50616e-05	Downregulated	HT vs HW	Endothelial cells
Ccpg1	2.74656e-09	-0.164922	0.011	0.09	6.76258e-05	Stable	HT vs HW	Endothelial cells
Rpl37a	2.79234e-09	-0.356677	0.029	0.142	6.87529e-05	Downregulated	HT vs HW	Endothelial cells
Dbnl	2.88225e-09	-0.264234	0.041	0.172	7.09668e-05	Downregulated	HT vs HW	Endothelial cells
Fbxo45	2.89992e-09	-0.218868	0.031	0.149	7.14018e-05	Stable	HT vs HW	Endothelial cells
Gpr146	2.91311e-09	-0.412747	0.055	0.201	7.17265e-05	Downregulated	HT vs HW	Endothelial cells
Ophn1	2.91566e-09	-0.367919	0.18	0.448	7.17895e-05	Downregulated	HT vs HW	Endothelial cells
Rexo2	2.92289e-09	-0.356593	0.076	0.246	7.19675e-05	Downregulated	HT vs HW	Endothelial cells
Rnf217	2.96515e-09	-0.243916	0.081	0.261	7.30079e-05	Stable	HT vs HW	Endothelial cells
Dglucy	3.00938e-09	-0.248719	0.081	0.261	7.40969e-05	Stable	HT vs HW	Endothelial cells
Hmgn3	3.04959e-09	-0.26867	0.026	0.134	7.5087e-05	Downregulated	HT vs HW	Endothelial cells
Tle3	3.16611e-09	-0.390995	0.048	0.187	7.7956e-05	Downregulated	HT vs HW	Endothelial cells
Gna11	3.21392e-09	-0.329009	0.058	0.209	7.91331e-05	Downregulated	HT vs HW	Endothelial cells
Junb	3.25044e-09	-0.164572	0.058	0.209	8.00324e-05	Stable	HT vs HW	Endothelial cells
Prss23	3.26873e-09	-0.493393	0.016	0.104	8.04827e-05	Downregulated	HT vs HW	Endothelial cells
Gramd1a	3.31528e-09	-0.310692	0.068	0.231	8.16289e-05	Downregulated	HT vs HW	Endothelial cells
Brk1	3.3629e-09	-0.233097	0.057	0.209	8.28012e-05	Stable	HT vs HW	Endothelial cells
Gata2	3.36409e-09	-0.26504	0.086	0.269	8.28305e-05	Downregulated	HT vs HW	Endothelial cells
Ocrl	3.37842e-09	-0.371486	0.079	0.254	8.31835e-05	Downregulated	HT vs HW	Endothelial cells
Gm20655	3.41447e-09	-0.351798	0.021	0.119	8.40711e-05	Downregulated	HT vs HW	Endothelial cells
Mcu	3.42543e-09	-0.29094	0.196	0.478	8.43409e-05	Downregulated	HT vs HW	Endothelial cells
Myo1c	3.43086e-09	-0.305184	0.163	0.418	8.44747e-05	Downregulated	HT vs HW	Endothelial cells
Dnajb11	3.43436e-09	-0.321923	0.016	0.104	8.45607e-05	Downregulated	HT vs HW	Endothelial cells
Fas	3.50749e-09	-0.27684	0.184	0.455	8.63615e-05	Downregulated	HT vs HW	Endothelial cells
Tshz1	3.53462e-09	-0.42976	0.087	0.269	8.70294e-05	Downregulated	HT vs HW	Endothelial cells
Impdh1	3.55763e-09	-0.158727	0.023	0.127	8.75961e-05	Stable	HT vs HW	Endothelial cells
Marcks	3.69684e-09	-0.368728	0.095	0.284	9.10237e-05	Downregulated	HT vs HW	Endothelial cells
Parvb	3.70798e-09	-0.250904	0.197	0.478	9.1298e-05	Downregulated	HT vs HW	Endothelial cells
Cflar	3.72347e-09	-0.319421	0.206	0.493	9.16792e-05	Downregulated	HT vs HW	Endothelial cells
Mgat5	3.74722e-09	-0.408198	0.202	0.463	9.22641e-05	Downregulated	HT vs HW	Endothelial cells
Ralgds	3.82851e-09	-0.425282	0.032	0.149	9.42655e-05	Downregulated	HT vs HW	Endothelial cells
BC005537	3.82966e-09	-0.287176	0.105	0.306	9.4294e-05	Downregulated	HT vs HW	Endothelial cells
Acvrl1	3.8336e-09	-0.36264	0.145	0.381	9.43909e-05	Downregulated	HT vs HW	Endothelial cells
Sec11a	3.87102e-09	-0.269023	0.058	0.209	9.53122e-05	Downregulated	HT vs HW	Endothelial cells
1700020I14Rik	3.90242e-09	-0.192855	0.156	0.41	9.60854e-05	Stable	HT vs HW	Endothelial cells
Etf1	3.90762e-09	-0.274305	0.093	0.284	9.62133e-05	Downregulated	HT vs HW	Endothelial cells
Nfkbiz	3.94924e-09	-0.27624	0.112	0.321	9.72381e-05	Downregulated	HT vs HW	Endothelial cells
Prpf8	4.13805e-09	-0.253728	0.048	0.187	0.000101887	Downregulated	HT vs HW	Endothelial cells
Arf3	4.14254e-09	-0.169059	0.051	0.194	0.000101998	Stable	HT vs HW	Endothelial cells
Hid1	4.17636e-09	-0.301033	0.059	0.209	0.00010283	Downregulated	HT vs HW	Endothelial cells
Ncoa3	4.18575e-09	-0.168346	0.215	0.53	0.000103061	Stable	HT vs HW	Endothelial cells
Uba1	4.22496e-09	-0.193056	0.051	0.194	0.000104027	Stable	HT vs HW	Endothelial cells
Ltv1	4.31128e-09	-0.33791	0.004	0.06	0.000106152	Downregulated	HT vs HW	Endothelial cells
Cct8	4.4553e-09	-0.236173	0.042	0.172	0.000109698	Stable	HT vs HW	Endothelial cells
Rap1gds1	4.49977e-09	-0.302264	0.307	0.664	0.000110793	Downregulated	HT vs HW	Endothelial cells
Akt1	4.52567e-09	-0.240384	0.032	0.149	0.000111431	Stable	HT vs HW	Endothelial cells
Dcn	4.5674e-09	-0.44151	0.004	0.06	0.000112458	Downregulated	HT vs HW	Endothelial cells
Coa5	4.65602e-09	-0.210038	0.004	0.06	0.00011464	Stable	HT vs HW	Endothelial cells
Cct3	4.68713e-09	-0.209881	0.045	0.179	0.000115406	Stable	HT vs HW	Endothelial cells
Lhfp	4.71061e-09	-0.256335	0.058	0.209	0.000115985	Downregulated	HT vs HW	Endothelial cells
Dcaf10	4.76851e-09	-0.24557	0.105	0.306	0.00011741	Stable	HT vs HW	Endothelial cells
Mesd	4.80148e-09	-0.33419	0.073	0.239	0.000118222	Downregulated	HT vs HW	Endothelial cells
Psma5	4.81234e-09	-0.330245	0.035	0.157	0.000118489	Downregulated	HT vs HW	Endothelial cells
Tmpo	4.85606e-09	-0.273549	0.168	0.425	0.000119566	Downregulated	HT vs HW	Endothelial cells
Psen2	4.87122e-09	-0.452839	0.027	0.134	0.000119939	Downregulated	HT vs HW	Endothelial cells
Mia3	4.92944e-09	-0.364932	0.155	0.396	0.000121373	Downregulated	HT vs HW	Endothelial cells
Aspa	4.93202e-09	-0.161402	0.004	0.06	0.000121436	Stable	HT vs HW	Endothelial cells
Nod2	4.97586e-09	-0.333315	0.073	0.239	0.000122516	Downregulated	HT vs HW	Endothelial cells
Ap2a2	5.03606e-09	-0.395507	0.104	0.299	0.000123998	Downregulated	HT vs HW	Endothelial cells
Atp5o	5.41371e-09	-0.388475	0.04	0.164	0.000133296	Downregulated	HT vs HW	Endothelial cells
Pde3a	5.41615e-09	-0.219784	0.049	0.187	0.000133356	Stable	HT vs HW	Endothelial cells
Rps2	5.4266e-09	-0.30511	0.014	0.097	0.000133614	Downregulated	HT vs HW	Endothelial cells
Flt1	5.58177e-09	1.13274	0.74	0.761	0.000137434	Upregulated	HT vs HW	Endothelial cells
Shoc2	5.5958e-09	-0.348967	0.209	0.493	0.00013778	Downregulated	HT vs HW	Endothelial cells
Pdcd6ip	5.62343e-09	-0.189481	0.202	0.493	0.00013846	Stable	HT vs HW	Endothelial cells
Sptssa	5.69527e-09	-0.373815	0.046	0.179	0.000140229	Downregulated	HT vs HW	Endothelial cells
F2r	5.75633e-09	-0.265435	0.024	0.127	0.000141732	Downregulated	HT vs HW	Endothelial cells
Lrpprc	5.82472e-09	-0.377693	0.046	0.179	0.000143416	Downregulated	HT vs HW	Endothelial cells
Colec12	5.97831e-09	-0.477272	0.043	0.172	0.000147198	Downregulated	HT vs HW	Endothelial cells
Rara	6.04245e-09	-0.361933	0.053	0.194	0.000148777	Downregulated	HT vs HW	Endothelial cells
Retreg2	6.09032e-09	-0.207144	0.014	0.097	0.000149956	Stable	HT vs HW	Endothelial cells
2023-03-08	6.1632e-09	-0.398233	0.063	0.216	0.00015175	Downregulated	HT vs HW	Endothelial cells
Ube2d2a	6.18838e-09	-0.12067	0.169	0.433	0.00015237	Stable	HT vs HW	Endothelial cells
Leprot	6.19358e-09	-0.245678	0.024	0.127	0.000152498	Stable	HT vs HW	Endothelial cells
Nap1l1	6.26201e-09	-0.423928	0.03	0.142	0.000154183	Downregulated	HT vs HW	Endothelial cells
Scap	6.2877e-09	-0.22575	0.049	0.187	0.000154816	Stable	HT vs HW	Endothelial cells
Gpd2	6.29566e-09	-0.334667	0.073	0.239	0.000155012	Downregulated	HT vs HW	Endothelial cells
Adh7	6.3692e-09	-0.212279	0.014	0.097	0.000156823	Stable	HT vs HW	Endothelial cells
Stard3nl	6.55607e-09	-0.396675	0.043	0.172	0.000161423	Downregulated	HT vs HW	Endothelial cells
Tollip	6.56749e-09	-0.112004	0.042	0.172	0.000161705	Stable	HT vs HW	Endothelial cells
Aldh2	6.72546e-09	-0.319065	0.033	0.149	0.000165594	Downregulated	HT vs HW	Endothelial cells
Ppic	6.84737e-09	-0.284035	0.053	0.194	0.000168596	Downregulated	HT vs HW	Endothelial cells
Plcd3	6.8585e-09	-0.273345	0.03	0.142	0.00016887	Downregulated	HT vs HW	Endothelial cells
Plekho1	7.1292e-09	-0.305457	0.081	0.254	0.000175535	Downregulated	HT vs HW	Endothelial cells
Hsbp1	7.13294e-09	-0.29909	0.012	0.09	0.000175627	Downregulated	HT vs HW	Endothelial cells
Vkorc1l1	7.19691e-09	-0.287198	0.087	0.269	0.000177202	Downregulated	HT vs HW	Endothelial cells
Hhex	7.26332e-09	-0.321261	0.03	0.142	0.000178837	Downregulated	HT vs HW	Endothelial cells
Rras	7.29389e-09	-0.287002	0.04	0.164	0.00017959	Downregulated	HT vs HW	Endothelial cells
Guk1	7.29821e-09	-0.289591	0.019	0.112	0.000179696	Downregulated	HT vs HW	Endothelial cells
Ppp6c	7.4106e-09	-0.221461	0.088	0.269	0.000182464	Stable	HT vs HW	Endothelial cells
Arhgap18	7.44074e-09	2.03213	0.408	0.194	0.000183206	Upregulated	HT vs HW	Endothelial cells
Anp32e	7.46916e-09	-0.24464	0.027	0.134	0.000183906	Stable	HT vs HW	Endothelial cells
Chpf2	7.60491e-09	-0.331959	0.012	0.09	0.000187248	Downregulated	HT vs HW	Endothelial cells
Gm4070	7.72542e-09	-0.280828	0.019	0.112	0.000190215	Downregulated	HT vs HW	Endothelial cells
Chmp4b	7.73883e-09	-0.358146	0.086	0.261	0.000190545	Downregulated	HT vs HW	Endothelial cells
Uqcc3	7.97195e-09	-0.219103	0.006	0.067	0.000196285	Stable	HT vs HW	Endothelial cells
Zdhhc18	8.01537e-09	-0.166268	0.109	0.313	0.000197354	Stable	HT vs HW	Endothelial cells
Cdc42	8.30697e-09	-0.357379	0.27	0.59	0.000204534	Downregulated	HT vs HW	Endothelial cells
Ech1	8.61268e-09	-0.216923	0.012	0.09	0.000212061	Stable	HT vs HW	Endothelial cells
Ppl	8.63982e-09	-0.176707	0.006	0.067	0.00021273	Stable	HT vs HW	Endothelial cells
Ssr4	8.63982e-09	-0.190684	0.006	0.067	0.00021273	Stable	HT vs HW	Endothelial cells
Psme3	8.69987e-09	-0.328728	0.012	0.09	0.000214208	Downregulated	HT vs HW	Endothelial cells
Hipk3	8.73836e-09	-0.32442	0.189	0.455	0.000215156	Downregulated	HT vs HW	Endothelial cells
Ddx49	8.77745e-09	-0.19767	0.019	0.112	0.000216118	Stable	HT vs HW	Endothelial cells
Tal1	8.81756e-09	-0.0532981	0.109	0.313	0.000217106	Stable	HT vs HW	Endothelial cells
Egr3	8.86179e-09	-0.46962	0.006	0.067	0.000218195	Downregulated	HT vs HW	Endothelial cells
Mrpl20	8.86179e-09	-0.223316	0.006	0.067	0.000218195	Stable	HT vs HW	Endothelial cells
Commd8	8.90303e-09	-0.309247	0.01	0.082	0.00021921	Downregulated	HT vs HW	Endothelial cells
Alcam	8.94721e-09	-0.406102	0.008	0.075	0.000220298	Downregulated	HT vs HW	Endothelial cells
Ifngr1	8.95233e-09	-0.350566	0.201	0.478	0.000220424	Downregulated	HT vs HW	Endothelial cells
Mcf2l	9.2603e-09	1.60319	0.421	0.209	0.000228007	Upregulated	HT vs HW	Endothelial cells
Kalrn	9.26259e-09	-0.484254	0.461	0.806	0.000228064	Downregulated	HT vs HW	Endothelial cells
Ube2n	9.3348e-09	-0.217797	0.084	0.261	0.000229841	Stable	HT vs HW	Endothelial cells
Tpcn2	9.36043e-09	-0.238698	0.01	0.082	0.000230473	Stable	HT vs HW	Endothelial cells
Akt1s1	9.36045e-09	-0.267771	0.01	0.082	0.000230473	Downregulated	HT vs HW	Endothelial cells
Adgra3	9.38763e-09	-0.269487	0.053	0.194	0.000231142	Downregulated	HT vs HW	Endothelial cells
Nexmif	9.52927e-09	-0.364323	0.01	0.082	0.00023463	Downregulated	HT vs HW	Endothelial cells
Mettl13	9.56151e-09	-0.1208	0.006	0.067	0.000235423	Stable	HT vs HW	Endothelial cells
Map2k3	9.56889e-09	-0.326977	0.047	0.179	0.000235605	Downregulated	HT vs HW	Endothelial cells
Eif3b	9.57245e-09	-0.430336	0.064	0.216	0.000235693	Downregulated	HT vs HW	Endothelial cells
Map3k11	9.62826e-09	-0.278109	0.05	0.187	0.000237067	Downregulated	HT vs HW	Endothelial cells
Spryd3	9.7081e-09	-0.123137	0.03	0.142	0.000239033	Stable	HT vs HW	Endothelial cells
Mest	1.00059e-08	-0.419463	0.008	0.075	0.000246366	Downregulated	HT vs HW	Endothelial cells
Atp6v1b2	1.01748e-08	-0.230739	0.017	0.104	0.000250525	Stable	HT vs HW	Endothelial cells
Atp5c1	1.01799e-08	-0.333783	0.061	0.209	0.00025065	Downregulated	HT vs HW	Endothelial cells
Gm15564	1.03985e-08	-0.31309	0.008	0.075	0.000256032	Downregulated	HT vs HW	Endothelial cells
Serp1	1.04788e-08	-0.26649	0.008	0.075	0.000258008	Downregulated	HT vs HW	Endothelial cells
Snx9	1.04852e-08	-0.18495	0.138	0.366	0.000258168	Stable	HT vs HW	Endothelial cells
Eif3i	1.07969e-08	-0.230407	0.01	0.082	0.00026584	Stable	HT vs HW	Endothelial cells
Hipk2	1.08656e-08	-0.535945	0.049	0.179	0.000267533	Downregulated	HT vs HW	Endothelial cells
Eif4b	1.09938e-08	-0.35715	0.054	0.194	0.000270689	Downregulated	HT vs HW	Endothelial cells
Xbp1	1.11709e-08	-0.333517	0.068	0.224	0.000275051	Downregulated	HT vs HW	Endothelial cells
Gprasp1	1.1251e-08	-0.125021	0.109	0.313	0.000277023	Stable	HT vs HW	Endothelial cells
Gnpat	1.13155e-08	-0.137265	0.008	0.075	0.000278611	Stable	HT vs HW	Endothelial cells
Adcy6	1.13752e-08	-0.227387	0.057	0.201	0.000280081	Stable	HT vs HW	Endothelial cells
Calm3	1.15822e-08	-0.282504	0.017	0.104	0.000285177	Downregulated	HT vs HW	Endothelial cells
Sec13	1.17536e-08	-0.287964	0.017	0.104	0.000289398	Downregulated	HT vs HW	Endothelial cells
Rasgrf2	1.19841e-08	-0.499426	0.433	0.784	0.000295072	Downregulated	HT vs HW	Endothelial cells
H1f0	1.19861e-08	-0.285894	0.025	0.127	0.000295121	Downregulated	HT vs HW	Endothelial cells
Glg1	1.20617e-08	-0.389697	0.237	0.53	0.000296983	Downregulated	HT vs HW	Endothelial cells
Ikzf2	1.2638e-08	-0.321877	0.028	0.134	0.000311173	Downregulated	HT vs HW	Endothelial cells
Rasip1	1.26382e-08	-0.252223	0.291	0.634	0.000311179	Downregulated	HT vs HW	Endothelial cells
H2-Q6	1.27204e-08	-0.155619	0.063	0.216	0.000313203	Stable	HT vs HW	Endothelial cells
2023-03-03	1.2933e-08	-0.343166	0.331	0.679	0.000318437	Downregulated	HT vs HW	Endothelial cells
Inafm2	1.29955e-08	-0.338381	0.003	0.052	0.000319975	Downregulated	HT vs HW	Endothelial cells
Megf9	1.3178e-08	-0.146017	0.017	0.104	0.00032447	Stable	HT vs HW	Endothelial cells
Ch25h	1.33999e-08	-0.362048	0.003	0.052	0.000329932	Downregulated	HT vs HW	Endothelial cells
Rex1bd	1.33999e-08	-0.315868	0.003	0.052	0.000329932	Downregulated	HT vs HW	Endothelial cells
Mbnl1	1.34829e-08	-0.492941	0.544	0.866	0.000331977	Downregulated	HT vs HW	Endothelial cells
Acta2	1.36066e-08	-0.319045	0.003	0.052	0.000335022	Downregulated	HT vs HW	Endothelial cells
2310022B05Rik	1.38097e-08	-0.163637	0.017	0.104	0.000340023	Stable	HT vs HW	Endothelial cells
Dhrs7b	1.38165e-08	-0.175876	0.003	0.052	0.00034019	Stable	HT vs HW	Endothelial cells
Cd82	1.40916e-08	-0.258627	0.028	0.134	0.000346964	Downregulated	HT vs HW	Endothelial cells
Gas5	1.41181e-08	-0.331045	0.048	0.179	0.000347617	Downregulated	HT vs HW	Endothelial cells
Chchd4	1.42457e-08	-0.24073	0.003	0.052	0.000350757	Stable	HT vs HW	Endothelial cells
Fam173a	1.43916e-08	-0.156617	0.003	0.052	0.00035435	Stable	HT vs HW	Endothelial cells
Csde1	1.44151e-08	-0.132358	0.213	0.507	0.000354929	Stable	HT vs HW	Endothelial cells
Banf1	1.46878e-08	-0.133897	0.003	0.052	0.000361643	Stable	HT vs HW	Endothelial cells
Cept1	1.48084e-08	-0.230371	0.169	0.418	0.000364611	Stable	HT vs HW	Endothelial cells
Hmgcs1	1.49899e-08	-0.155366	0.003	0.052	0.000369082	Stable	HT vs HW	Endothelial cells
Smap1	1.53155e-08	-0.160299	0.15	0.388	0.000377097	Stable	HT vs HW	Endothelial cells
Nfkbia	1.54262e-08	-0.205771	0.147	0.381	0.000379824	Stable	HT vs HW	Endothelial cells
Ick	1.55174e-08	-0.179861	0.135	0.358	0.00038207	Stable	HT vs HW	Endothelial cells
Hp1bp3	1.55495e-08	-0.121004	0.103	0.299	0.000382861	Stable	HT vs HW	Endothelial cells
Limch1	1.59134e-08	1.65776	0.482	0.313	0.000391819	Upregulated	HT vs HW	Endothelial cells
Znrf3	1.60661e-08	-0.16506	0.097	0.284	0.000395579	Stable	HT vs HW	Endothelial cells
Id3	1.61636e-08	-0.337962	0.084	0.254	0.00039798	Downregulated	HT vs HW	Endothelial cells
Katna1	1.62265e-08	-0.190008	0.025	0.127	0.00039953	Stable	HT vs HW	Endothelial cells
Mrps28	1.66042e-08	-0.245743	0.075	0.239	0.000408829	Stable	HT vs HW	Endothelial cells
Zc3h13	1.6612e-08	-0.100896	0.145	0.381	0.000409021	Stable	HT vs HW	Endothelial cells
Nosip	1.68752e-08	-0.212332	0.031	0.142	0.000415501	Stable	HT vs HW	Endothelial cells
Pef1	1.73324e-08	-0.259711	0.02	0.112	0.000426758	Downregulated	HT vs HW	Endothelial cells
Gm4951	1.7372e-08	-0.342054	0.079	0.246	0.000427734	Downregulated	HT vs HW	Endothelial cells
Ubb	1.73799e-08	-0.212056	0.02	0.112	0.000427928	Stable	HT vs HW	Endothelial cells
Tnk2	1.74489e-08	-0.138033	0.034	0.149	0.000429627	Stable	HT vs HW	Endothelial cells
Pecam1	1.74536e-08	-0.503278	0.825	0.948	0.000429743	Downregulated	HT vs HW	Endothelial cells
Msrb3	1.75282e-08	-0.499828	0.392	0.761	0.00043158	Downregulated	HT vs HW	Endothelial cells
Esr1	1.77809e-08	-0.476204	0.049	0.179	0.000437801	Downregulated	HT vs HW	Endothelial cells
Rad51d	1.82519e-08	-0.113415	0.031	0.142	0.000449398	Stable	HT vs HW	Endothelial cells
Wscd1	1.8408e-08	-0.235561	0.02	0.112	0.000453242	Stable	HT vs HW	Endothelial cells
Zfp871	1.86338e-08	-0.0887817	0.106	0.306	0.000458801	Stable	HT vs HW	Endothelial cells
Rnd1	1.87487e-08	-0.189599	0.015	0.097	0.000461631	Stable	HT vs HW	Endothelial cells
4833439L19Rik	1.91085e-08	-0.111699	0.037	0.157	0.000470488	Stable	HT vs HW	Endothelial cells
Cracr2b	1.94243e-08	-0.194398	0.048	0.179	0.000478264	Stable	HT vs HW	Endothelial cells
Nr6a1	1.94785e-08	-0.25976	0.15	0.381	0.0004796	Downregulated	HT vs HW	Endothelial cells
Plpp1	1.99207e-08	-0.477436	0.404	0.754	0.000490487	Downregulated	HT vs HW	Endothelial cells
Fut11	2.02012e-08	-0.14942	0.034	0.149	0.000497394	Stable	HT vs HW	Endothelial cells
Ranbp1	2.06924e-08	-0.318634	0.023	0.119	0.000509488	Downregulated	HT vs HW	Endothelial cells
Hprt	2.1046e-08	-0.281198	0.069	0.224	0.000518195	Downregulated	HT vs HW	Endothelial cells
Snx14	2.10703e-08	-0.235448	0.023	0.119	0.000518793	Stable	HT vs HW	Endothelial cells
Mta2	2.13583e-08	-0.131793	0.037	0.157	0.000525885	Stable	HT vs HW	Endothelial cells
Tiam2	2.22784e-08	-0.245597	0.069	0.224	0.000548539	Stable	HT vs HW	Endothelial cells
Mark4	2.28823e-08	-0.207167	0.069	0.224	0.000563409	Stable	HT vs HW	Endothelial cells
Sgk3	2.29094e-08	-0.34088	0.099	0.284	0.000564076	Downregulated	HT vs HW	Endothelial cells
Dnajc5	2.29897e-08	-0.0796942	0.144	0.373	0.000566052	Stable	HT vs HW	Endothelial cells
Fzd6	2.37413e-08	-0.363559	0.196	0.455	0.000584557	Downregulated	HT vs HW	Endothelial cells
Copa	2.4026e-08	-0.0996814	0.189	0.463	0.000591567	Stable	HT vs HW	Endothelial cells
Trp53inp2	2.4441e-08	-0.445059	0.013	0.09	0.000601787	Downregulated	HT vs HW	Endothelial cells
Lrp10	2.52879e-08	-0.243673	0.026	0.127	0.000622639	Stable	HT vs HW	Endothelial cells
Wdr89	2.57217e-08	-0.271334	0.013	0.09	0.000633319	Downregulated	HT vs HW	Endothelial cells
Arhgap39	2.58906e-08	-0.379971	0.018	0.104	0.000637478	Downregulated	HT vs HW	Endothelial cells
Plcb4	2.5947e-08	0.649796	0.882	0.925	0.000638866	Upregulated	HT vs HW	Endothelial cells
Slk	2.60421e-08	-0.0663671	0.191	0.463	0.000641209	Stable	HT vs HW	Endothelial cells
Cyhr1	2.61351e-08	-0.255558	0.013	0.09	0.000643497	Downregulated	HT vs HW	Endothelial cells
Fhl1	2.63538e-08	-0.226693	0.127	0.336	0.000648882	Stable	HT vs HW	Endothelial cells
Ubtd2	2.64564e-08	-0.252651	0.042	0.164	0.00065141	Downregulated	HT vs HW	Endothelial cells
Ndufb11	2.68316e-08	-0.463865	0.011	0.082	0.000660647	Downregulated	HT vs HW	Endothelial cells
Gdap2	2.68921e-08	-0.216035	0.042	0.164	0.000662138	Stable	HT vs HW	Endothelial cells
Rnpepl1	2.79263e-08	-0.347267	0.07	0.224	0.000687601	Downregulated	HT vs HW	Endothelial cells
Ralb	2.79589e-08	-0.333819	0.123	0.321	0.000688404	Downregulated	HT vs HW	Endothelial cells
Ing2	2.81086e-08	-0.20964	0.032	0.142	0.000692091	Stable	HT vs HW	Endothelial cells
Vrk3	2.83568e-08	-0.142663	0.042	0.164	0.000698202	Stable	HT vs HW	Endothelial cells
Sh3bgrl	2.84267e-08	-0.452727	0.249	0.53	0.000699922	Downregulated	HT vs HW	Endothelial cells
Il6st	2.84704e-08	-0.371546	0.318	0.657	0.000700998	Downregulated	HT vs HW	Endothelial cells
Nt5c2	2.90624e-08	-0.230056	0.127	0.336	0.000715576	Stable	HT vs HW	Endothelial cells
Arl2bp	2.92058e-08	-0.196844	0.032	0.142	0.000719104	Stable	HT vs HW	Endothelial cells
Pura	2.92974e-08	-0.182539	0.099	0.284	0.000721361	Stable	HT vs HW	Endothelial cells
Becn1	2.92985e-08	-0.163036	0.087	0.261	0.000721387	Stable	HT vs HW	Endothelial cells
Hmces	2.93078e-08	-0.1782	0.013	0.09	0.000721617	Stable	HT vs HW	Endothelial cells
Minpp1	2.94866e-08	-0.239431	0.035	0.149	0.000726019	Stable	HT vs HW	Endothelial cells
Synj2	2.99105e-08	-0.300889	0.122	0.321	0.000736458	Downregulated	HT vs HW	Endothelial cells
Atf1	2.9995e-08	-0.218432	0.066	0.216	0.000738538	Stable	HT vs HW	Endothelial cells
Cct5	3.0455e-08	-0.17424	0.029	0.134	0.000749862	Stable	HT vs HW	Endothelial cells
Rps10	3.05145e-08	-0.296659	0.011	0.082	0.000751329	Downregulated	HT vs HW	Endothelial cells
Pigs	3.1109e-08	-0.23291	0.005	0.06	0.000765966	Stable	HT vs HW	Endothelial cells
B230219D22Rik	3.14564e-08	-0.190934	0.081	0.246	0.000774521	Stable	HT vs HW	Endothelial cells
Zbtb22	3.1658e-08	-0.21684	0.005	0.06	0.000779484	Stable	HT vs HW	Endothelial cells
Psmg1	3.1936e-08	-0.178337	0.005	0.06	0.000786329	Stable	HT vs HW	Endothelial cells
Ppp1r9b	3.22692e-08	-0.0593351	0.083	0.254	0.000794532	Stable	HT vs HW	Endothelial cells
Secisbp2l	3.2375e-08	-0.301978	0.117	0.313	0.000797138	Downregulated	HT vs HW	Endothelial cells
Gabarap	3.24259e-08	-0.388923	0.033	0.142	0.00079839	Downregulated	HT vs HW	Endothelial cells
Nkiras2	3.24992e-08	-0.229104	0.005	0.06	0.000800195	Stable	HT vs HW	Endothelial cells
Cyp20a1	3.27751e-08	-0.26275	0.046	0.172	0.000806988	Downregulated	HT vs HW	Endothelial cells
Ppp4c	3.28911e-08	-0.16864	0.059	0.201	0.000809844	Stable	HT vs HW	Endothelial cells
Ccdc71l	3.3072e-08	-0.17884	0.005	0.06	0.000814298	Stable	HT vs HW	Endothelial cells
Cd93	3.31369e-08	-0.48867	0.275	0.552	0.000815898	Downregulated	HT vs HW	Endothelial cells
Ebf1	3.31524e-08	0.490319	0.886	0.896	0.000816278	Upregulated	HT vs HW	Endothelial cells
D17Wsu92e	3.36428e-08	-0.293618	0.126	0.328	0.000828352	Downregulated	HT vs HW	Endothelial cells
Crat	3.36546e-08	-0.246969	0.005	0.06	0.000828643	Stable	HT vs HW	Endothelial cells
Hspb1	3.37437e-08	-0.394782	0.021	0.112	0.000830838	Downregulated	HT vs HW	Endothelial cells
Lrp1	3.37632e-08	-0.239167	0.002	0.045	0.000831317	Stable	HT vs HW	Endothelial cells
6330562C20Rik	3.42471e-08	-0.143165	0.005	0.06	0.000843232	Stable	HT vs HW	Endothelial cells
B3gnt3	3.45584e-08	-0.329971	0.043	0.164	0.000850896	Downregulated	HT vs HW	Endothelial cells
Plekho2	3.49516e-08	-0.18291	0.032	0.142	0.000860578	Stable	HT vs HW	Endothelial cells
Stk40	3.5078e-08	-0.0898171	0.072	0.231	0.000863691	Stable	HT vs HW	Endothelial cells
Hdgfl3	3.52548e-08	-0.213071	0.14	0.358	0.000868043	Stable	HT vs HW	Endothelial cells
Wrb	3.52952e-08	-0.187126	0.002	0.045	0.000869037	Stable	HT vs HW	Endothelial cells
Adam10	3.5376e-08	-0.225668	0.299	0.642	0.000871027	Stable	HT vs HW	Endothelial cells
Serpinb8	3.55787e-08	-0.339413	0.021	0.112	0.000876018	Downregulated	HT vs HW	Endothelial cells
Dmpk	3.56886e-08	-0.157199	0.002	0.045	0.000878724	Stable	HT vs HW	Endothelial cells
Btnl9	3.57488e-08	1.64926	0.307	0.09	0.000880208	Upregulated	HT vs HW	Endothelial cells
Mrps12	3.60862e-08	-0.240201	0.002	0.045	0.000888515	Stable	HT vs HW	Endothelial cells
Ube2j2	3.61743e-08	-0.155041	0.059	0.201	0.000890684	Stable	HT vs HW	Endothelial cells
Mrpl34	3.64882e-08	-0.115522	0.002	0.045	0.000898411	Stable	HT vs HW	Endothelial cells
Tmem250-ps	3.64882e-08	-0.139307	0.002	0.045	0.000898411	Stable	HT vs HW	Endothelial cells
Cln8	3.68944e-08	-0.127541	0.002	0.045	0.000908415	Stable	HT vs HW	Endothelial cells
Gss	3.68944e-08	-0.264576	0.002	0.045	0.000908415	Downregulated	HT vs HW	Endothelial cells
Mrfap1	3.68944e-08	-0.157951	0.002	0.045	0.000908415	Stable	HT vs HW	Endothelial cells
Ndufa5	3.68944e-08	-0.122833	0.002	0.045	0.000908415	Stable	HT vs HW	Endothelial cells
Stat5a	3.68944e-08	-0.258614	0.002	0.045	0.000908415	Downregulated	HT vs HW	Endothelial cells
Mfsd1	3.71323e-08	-0.327401	0.009	0.075	0.000914272	Downregulated	HT vs HW	Endothelial cells
Dok3	3.73051e-08	-0.1248	0.002	0.045	0.000918527	Stable	HT vs HW	Endothelial cells
Pik3c2b	3.73292e-08	-0.0907299	0.169	0.418	0.000919119	Stable	HT vs HW	Endothelial cells
Phldb1	3.73864e-08	-0.29636	0.089	0.261	0.000920529	Downregulated	HT vs HW	Endothelial cells
Ppp1r16b	3.75455e-08	-0.143357	0.256	0.567	0.000924444	Stable	HT vs HW	Endothelial cells
Miga2	3.77202e-08	-0.108245	0.002	0.045	0.000928747	Stable	HT vs HW	Endothelial cells
Nagpa	3.77202e-08	-0.125803	0.002	0.045	0.000928747	Stable	HT vs HW	Endothelial cells
Prelp	3.77202e-08	-0.168987	0.002	0.045	0.000928747	Stable	HT vs HW	Endothelial cells
Scamp3	3.77294e-08	-0.287616	0.007	0.067	0.000928975	Downregulated	HT vs HW	Endothelial cells
Slc44a2	3.78177e-08	-0.411031	0.12	0.313	0.000931147	Downregulated	HT vs HW	Endothelial cells
Atp7a	3.82396e-08	-0.100526	0.128	0.336	0.000941535	Stable	HT vs HW	Endothelial cells
Rab31	3.83298e-08	-0.377889	0.112	0.306	0.000943756	Downregulated	HT vs HW	Endothelial cells
Hoxa10	3.87747e-08	-0.2809	0.009	0.075	0.000954711	Downregulated	HT vs HW	Endothelial cells
Gm12002	3.88391e-08	1.77263	0.26	0.045	0.000956297	Upregulated	HT vs HW	Endothelial cells
Gbp5	3.97929e-08	-0.153162	0.063	0.209	0.000979781	Stable	HT vs HW	Endothelial cells
Dnajc10	4.03895e-08	-0.0565485	0.103	0.291	0.00099447	Stable	HT vs HW	Endothelial cells
Eef1g	4.04475e-08	-0.36113	0.04	0.157	0.000995899	Downregulated	HT vs HW	Endothelial cells
Gtf2f2	4.05757e-08	-0.25783	0.097	0.276	0.000999056	Downregulated	HT vs HW	Endothelial cells
Fads1	4.078e-08	-0.296115	0.009	0.075	0.00100408	Downregulated	HT vs HW	Endothelial cells
Cmya5	4.08074e-08	-0.476205	0.007	0.067	0.00100476	Downregulated	HT vs HW	Endothelial cells
Prdx4	4.11206e-08	-0.287622	0.016	0.097	0.00101247	Downregulated	HT vs HW	Endothelial cells
Cldn5	4.122e-08	-0.543699	0.351	0.642	0.00101492	Downregulated	HT vs HW	Endothelial cells
Rsph9	4.13711e-08	-0.241335	0.009	0.075	0.00101864	Stable	HT vs HW	Endothelial cells
St3gal4	4.15514e-08	-0.19007	0.202	0.463	0.00102308	Stable	HT vs HW	Endothelial cells
Eprs	4.1599e-08	-0.360824	0.083	0.246	0.00102425	Downregulated	HT vs HW	Endothelial cells
Tmem248	4.19223e-08	-0.135158	0.059	0.201	0.00103221	Stable	HT vs HW	Endothelial cells
Tmed4	4.22735e-08	-0.176935	0.009	0.075	0.00104086	Stable	HT vs HW	Endothelial cells
Cnih1	4.24363e-08	-0.16433	0.007	0.067	0.00104487	Stable	HT vs HW	Endothelial cells
Pofut2	4.24363e-08	-0.160784	0.007	0.067	0.00104487	Stable	HT vs HW	Endothelial cells
Usp22	4.26164e-08	-0.173535	0.056	0.194	0.0010493	Stable	HT vs HW	Endothelial cells
Cttnbp2	4.28229e-08	-0.251181	0.05	0.179	0.00105439	Downregulated	HT vs HW	Endothelial cells
Vamp8	4.30897e-08	-0.287578	0.016	0.097	0.00106095	Downregulated	HT vs HW	Endothelial cells
Mical1	4.31053e-08	-0.164946	0.007	0.067	0.00106134	Stable	HT vs HW	Endothelial cells
Ecscr	4.33231e-08	-0.152708	0.129	0.336	0.0010667	Stable	HT vs HW	Endothelial cells
Ptp4a2	4.34264e-08	-0.166111	0.26	0.575	0.00106924	Stable	HT vs HW	Endothelial cells
Zbed3	4.38514e-08	-0.271577	0.016	0.097	0.00107971	Downregulated	HT vs HW	Endothelial cells
Tipin	4.40311e-08	-0.370468	0.036	0.149	0.00108413	Downregulated	HT vs HW	Endothelial cells
Ythdf1	4.46163e-08	-0.436099	0.019	0.104	0.00109854	Downregulated	HT vs HW	Endothelial cells
Rab27b	4.47565e-08	-0.351875	0.016	0.097	0.00110199	Downregulated	HT vs HW	Endothelial cells
Tbx1	4.50965e-08	-0.157039	0.009	0.075	0.00111037	Stable	HT vs HW	Endothelial cells
Fbxo34	4.56972e-08	-0.403777	0.155	0.373	0.00112516	Downregulated	HT vs HW	Endothelial cells
Sspn	4.57482e-08	-0.198262	0.009	0.075	0.00112641	Stable	HT vs HW	Endothelial cells
Mthfd1l	4.64211e-08	-0.19586	0.05	0.179	0.00114298	Stable	HT vs HW	Endothelial cells
Zfp40	4.78336e-08	-0.216756	0.036	0.149	0.00117776	Stable	HT vs HW	Endothelial cells
Pea15a	4.80214e-08	-0.2407	0.098	0.276	0.00118238	Stable	HT vs HW	Endothelial cells
Zfp664	4.89476e-08	-0.250196	0.075	0.231	0.00120519	Downregulated	HT vs HW	Endothelial cells
Chst15	4.90684e-08	-0.147392	0.063	0.209	0.00120816	Stable	HT vs HW	Endothelial cells
Vav3	4.92225e-08	1.40569	0.406	0.187	0.00121196	Upregulated	HT vs HW	Endothelial cells
Tcf4	4.98635e-08	0.659013	0.905	0.948	0.00122774	Upregulated	HT vs HW	Endothelial cells
Tmem167	4.98916e-08	-0.221815	0.085	0.254	0.00122843	Stable	HT vs HW	Endothelial cells
Agpat3	5.00396e-08	-0.244611	0.082	0.246	0.00123207	Stable	HT vs HW	Endothelial cells
Klhl12	5.05443e-08	-0.349889	0.054	0.187	0.0012445	Downregulated	HT vs HW	Endothelial cells
Hnrnpd	5.20279e-08	-0.340956	0.128	0.328	0.00128103	Downregulated	HT vs HW	Endothelial cells
1600012H06Rik	5.20713e-08	-0.183436	0.016	0.097	0.0012821	Stable	HT vs HW	Endothelial cells
Srsf6	5.26757e-08	-0.0896153	0.099	0.284	0.00129698	Stable	HT vs HW	Endothelial cells
Fnip2	5.27216e-08	-0.249106	0.219	0.493	0.00129811	Stable	HT vs HW	Endothelial cells
1700028E10Rik	5.51507e-08	-0.147947	0	0.03	0.00135792	Stable	HT vs HW	Endothelial cells
4930404N11Rik	5.51507e-08	-0.0909207	0	0.03	0.00135792	Stable	HT vs HW	Endothelial cells
AL732506.1	5.51507e-08	-0.107134	0	0.03	0.00135792	Stable	HT vs HW	Endothelial cells
Adora1	5.51507e-08	-0.128691	0	0.03	0.00135792	Stable	HT vs HW	Endothelial cells
Alad	5.51507e-08	-0.114409	0	0.03	0.00135792	Stable	HT vs HW	Endothelial cells
Aldh4a1	5.51507e-08	-0.134985	0	0.03	0.00135792	Stable	HT vs HW	Endothelial cells
Creg1	5.51507e-08	-0.0680162	0	0.03	0.00135792	Stable	HT vs HW	Endothelial cells
Ctsa	5.51507e-08	-0.0922757	0	0.03	0.00135792	Stable	HT vs HW	Endothelial cells
Emc9	5.51507e-08	-0.0673538	0	0.03	0.00135792	Stable	HT vs HW	Endothelial cells
Gba	5.51507e-08	-0.10819	0	0.03	0.00135792	Stable	HT vs HW	Endothelial cells
Itm2a	5.51507e-08	-0.126075	0	0.03	0.00135792	Stable	HT vs HW	Endothelial cells
Lrrc61	5.51507e-08	-0.116226	0	0.03	0.00135792	Stable	HT vs HW	Endothelial cells
Mrpl35	5.51507e-08	-0.150721	0	0.03	0.00135792	Stable	HT vs HW	Endothelial cells
Orm1	5.51507e-08	-0.104453	0	0.03	0.00135792	Stable	HT vs HW	Endothelial cells
Prss36	5.51507e-08	-0.152003	0	0.03	0.00135792	Stable	HT vs HW	Endothelial cells
Rbp4	5.51507e-08	-0.174399	0	0.03	0.00135792	Stable	HT vs HW	Endothelial cells
Rrs1	5.51507e-08	-0.0740532	0	0.03	0.00135792	Stable	HT vs HW	Endothelial cells
Sele	5.51507e-08	-0.20474	0	0.03	0.00135792	Stable	HT vs HW	Endothelial cells
Six1	5.51507e-08	-0.102252	0	0.03	0.00135792	Stable	HT vs HW	Endothelial cells
Slc16a7	5.51507e-08	-0.102366	0	0.03	0.00135792	Stable	HT vs HW	Endothelial cells
Surf4	5.51507e-08	-0.077712	0	0.03	0.00135792	Stable	HT vs HW	Endothelial cells
Tpi1	5.51507e-08	-0.247222	0	0.03	0.00135792	Stable	HT vs HW	Endothelial cells
Tspan8	5.51507e-08	-0.119986	0	0.03	0.00135792	Stable	HT vs HW	Endothelial cells
Clip1	5.51549e-08	-0.295242	0.211	0.478	0.00135802	Downregulated	HT vs HW	Endothelial cells
Edem2	5.56637e-08	-0.248457	0.019	0.104	0.00137055	Stable	HT vs HW	Endothelial cells
Smap2	5.57439e-08	-0.209527	0.085	0.254	0.00137253	Stable	HT vs HW	Endothelial cells
Larp4	5.57439e-08	-0.159568	0.085	0.254	0.00137253	Stable	HT vs HW	Endothelial cells
Ralgapa2	5.57988e-08	-0.386647	0.281	0.59	0.00137388	Downregulated	HT vs HW	Endothelial cells
Tln1	5.59e-08	-0.270565	0.133	0.343	0.00137637	Downregulated	HT vs HW	Endothelial cells
2023-03-02	5.59822e-08	-0.257741	0.061	0.201	0.00137839	Downregulated	HT vs HW	Endothelial cells
Tmem2	5.612e-08	-0.288958	0.257	0.545	0.00138179	Downregulated	HT vs HW	Endothelial cells
Arpc1b	5.61806e-08	-0.407169	0.158	0.381	0.00138328	Downregulated	HT vs HW	Endothelial cells
Supt6	5.77741e-08	-0.0639871	0.073	0.231	0.00142251	Stable	HT vs HW	Endothelial cells
Emc10	5.78565e-08	-0.31994	0.051	0.179	0.00142454	Downregulated	HT vs HW	Endothelial cells
Zfp592	5.87679e-08	0.0383701	0.113	0.313	0.00144698	Stable	HT vs HW	Endothelial cells
Eef2k	5.91927e-08	-0.284166	0.057	0.194	0.00145744	Downregulated	HT vs HW	Endothelial cells
Col4a3bp	5.95456e-08	-0.0873016	0.186	0.448	0.00146613	Stable	HT vs HW	Endothelial cells
Mrpl3	6.04e-08	-0.187031	0.03	0.134	0.00148717	Stable	HT vs HW	Endothelial cells
C2cd5	6.06211e-08	-0.254651	0.083	0.246	0.00149261	Downregulated	HT vs HW	Endothelial cells
Spopl	6.08036e-08	-0.243275	0.196	0.455	0.00149711	Stable	HT vs HW	Endothelial cells
Tshz2	6.13405e-08	0.904199	0.708	0.575	0.00151032	Upregulated	HT vs HW	Endothelial cells
Zbtb40	6.16071e-08	-0.0258267	0.043	0.164	0.00151689	Stable	HT vs HW	Endothelial cells
Ndrg3	6.27336e-08	-0.15352	0.057	0.194	0.00154463	Stable	HT vs HW	Endothelial cells
Tnrc6a	6.30338e-08	-0.0981784	0.145	0.373	0.00155202	Stable	HT vs HW	Endothelial cells
5031425E22Rik	6.32164e-08	-0.0577136	0.23	0.537	0.00155652	Stable	HT vs HW	Endothelial cells
Spred1	6.33586e-08	-0.20712	0.154	0.381	0.00156001	Stable	HT vs HW	Endothelial cells
Rab12	6.38664e-08	-0.192087	0.121	0.321	0.00157252	Stable	HT vs HW	Endothelial cells
Glis3	6.41597e-08	-0.614116	0.051	0.179	0.00157974	Downregulated	HT vs HW	Endothelial cells
Bscl2	6.44464e-08	-0.136441	0.001	0.037	0.0015868	Stable	HT vs HW	Endothelial cells
Smtnl2	6.44464e-08	-0.131585	0.001	0.037	0.0015868	Stable	HT vs HW	Endothelial cells
Actr10	6.44534e-08	-0.186035	0.086	0.254	0.00158697	Stable	HT vs HW	Endothelial cells
Itpr3	6.51191e-08	-0.173676	0.093	0.269	0.00160336	Stable	HT vs HW	Endothelial cells
Mien1	6.52606e-08	-0.180711	0.001	0.037	0.00160685	Stable	HT vs HW	Endothelial cells
Nr4a1	6.57829e-08	-0.161871	0.027	0.127	0.00161971	Stable	HT vs HW	Endothelial cells
Sdc4	6.65002e-08	-0.140288	0.001	0.037	0.00163737	Stable	HT vs HW	Endothelial cells
Gnb5	6.69188e-08	-0.145384	0.001	0.037	0.00164768	Stable	HT vs HW	Endothelial cells
Mid1ip1	6.69188e-08	-0.0949766	0.001	0.037	0.00164768	Stable	HT vs HW	Endothelial cells
Rerg	6.69188e-08	-0.186785	0.001	0.037	0.00164768	Stable	HT vs HW	Endothelial cells
Snapc2	6.69188e-08	-0.223251	0.001	0.037	0.00164768	Stable	HT vs HW	Endothelial cells
Aph1b	6.69463e-08	-0.210034	0.019	0.104	0.00164835	Stable	HT vs HW	Endothelial cells
Lypla1	6.71854e-08	-0.147246	0.036	0.149	0.00165424	Stable	HT vs HW	Endothelial cells
1500011K16Rik	6.77632e-08	-0.166678	0.001	0.037	0.00166847	Stable	HT vs HW	Endothelial cells
Hint2	6.77632e-08	-0.130452	0.001	0.037	0.00166847	Stable	HT vs HW	Endothelial cells
Ndrg2	6.77632e-08	-0.287976	0.001	0.037	0.00166847	Downregulated	HT vs HW	Endothelial cells
Tusc5	6.77632e-08	-0.233822	0.001	0.037	0.00166847	Stable	HT vs HW	Endothelial cells
Cdc42ep4	6.80417e-08	-0.320481	0.041	0.157	0.00167532	Downregulated	HT vs HW	Endothelial cells
Slc12a7	6.8486e-08	-0.298951	0.178	0.418	0.00168626	Downregulated	HT vs HW	Endothelial cells
Dnase1l1	6.85962e-08	-0.216924	0.019	0.104	0.00168898	Stable	HT vs HW	Endothelial cells
Aoc3	6.86179e-08	-0.159229	0.001	0.037	0.00168951	Stable	HT vs HW	Endothelial cells
B3gnt8	6.86179e-08	-0.0708763	0.001	0.037	0.00168951	Stable	HT vs HW	Endothelial cells
Ecm1	6.86179e-08	-0.116312	0.001	0.037	0.00168951	Stable	HT vs HW	Endothelial cells
Eif1ad	6.86179e-08	-0.142819	0.001	0.037	0.00168951	Stable	HT vs HW	Endothelial cells
Etfb	6.86179e-08	-0.118102	0.001	0.037	0.00168951	Stable	HT vs HW	Endothelial cells
G6pdx	6.86179e-08	-0.093353	0.001	0.037	0.00168951	Stable	HT vs HW	Endothelial cells
Gpd1	6.86179e-08	-0.254671	0.001	0.037	0.00168951	Downregulated	HT vs HW	Endothelial cells
Hspa1a	6.86179e-08	-0.0741669	0.001	0.037	0.00168951	Stable	HT vs HW	Endothelial cells
Hspa1b	6.86179e-08	-0.134958	0.001	0.037	0.00168951	Stable	HT vs HW	Endothelial cells
P2ry1	6.86179e-08	-0.110545	0.001	0.037	0.00168951	Stable	HT vs HW	Endothelial cells
Tmem43	6.86179e-08	-0.112185	0.001	0.037	0.00168951	Stable	HT vs HW	Endothelial cells
Zfp524	6.86179e-08	-0.0665811	0.001	0.037	0.00168951	Stable	HT vs HW	Endothelial cells
Tusc3	6.90176e-08	-0.392074	0.065	0.209	0.00169935	Downregulated	HT vs HW	Endothelial cells
Tspan4	6.92894e-08	-0.216654	0.047	0.172	0.00170604	Stable	HT vs HW	Endothelial cells
Smim10l1	6.94605e-08	-0.153371	0.057	0.194	0.00171026	Stable	HT vs HW	Endothelial cells
Naa50	6.94783e-08	-0.30102	0.065	0.209	0.00171069	Downregulated	HT vs HW	Endothelial cells
N4bp2l2	6.96046e-08	-0.0682821	0.175	0.425	0.0017138	Stable	HT vs HW	Endothelial cells
Phtf2	6.96754e-08	-0.231727	0.054	0.187	0.00171555	Stable	HT vs HW	Endothelial cells
Lamb2	7.08814e-08	-0.145722	0.15	0.373	0.00174524	Stable	HT vs HW	Endothelial cells
Irak1	7.22198e-08	-0.206502	0.054	0.187	0.0017782	Stable	HT vs HW	Endothelial cells
Mff	7.24245e-08	-0.197036	0.075	0.231	0.00178324	Stable	HT vs HW	Endothelial cells
Dpysl3	7.30727e-08	-0.560389	0.082	0.239	0.0017992	Downregulated	HT vs HW	Endothelial cells
Ptk2b	7.34117e-08	-0.404499	0.045	0.164	0.00180754	Downregulated	HT vs HW	Endothelial cells
Ptpa	7.35118e-08	-0.197393	0.072	0.224	0.00181001	Stable	HT vs HW	Endothelial cells
Zfp277	7.47573e-08	-0.134929	0.123	0.321	0.00184067	Stable	HT vs HW	Endothelial cells
Nectin1	7.6272e-08	-0.386123	0.028	0.127	0.00187797	Downregulated	HT vs HW	Endothelial cells
Rpe	7.64209e-08	-0.21475	0.014	0.09	0.00188163	Stable	HT vs HW	Endothelial cells
Numa1	7.69498e-08	-0.118934	0.203	0.478	0.00189466	Stable	HT vs HW	Endothelial cells
Fignl2	7.70284e-08	-0.226055	0.054	0.187	0.00189659	Stable	HT vs HW	Endothelial cells
Mthfr	7.79161e-08	-0.27982	0.022	0.112	0.00191845	Downregulated	HT vs HW	Endothelial cells
Zfp266	7.91239e-08	-0.141543	0.112	0.306	0.00194819	Stable	HT vs HW	Endothelial cells
Erc1	8.02142e-08	-0.23064	0.277	0.59	0.00197503	Stable	HT vs HW	Endothelial cells
Pbxip1	8.09287e-08	-0.155099	0.09	0.261	0.00199263	Stable	HT vs HW	Endothelial cells
Actr2	8.16745e-08	-0.139514	0.182	0.433	0.00201099	Stable	HT vs HW	Endothelial cells
Copz2	8.16773e-08	-0.148874	0.014	0.09	0.00201106	Stable	HT vs HW	Endothelial cells
AW549877	8.42021e-08	-0.220249	0.037	0.149	0.00207323	Stable	HT vs HW	Endothelial cells
Id1	8.45324e-08	-0.107579	0.097	0.276	0.00208136	Stable	HT vs HW	Endothelial cells
Mdn1	8.49161e-08	-0.172648	0.075	0.231	0.0020908	Stable	HT vs HW	Endothelial cells
Acvr1b	8.6205e-08	-0.356826	0.067	0.209	0.00212254	Downregulated	HT vs HW	Endothelial cells
Fam43a	8.78124e-08	-0.364663	0.059	0.194	0.00216212	Downregulated	HT vs HW	Endothelial cells
Dhx35	8.84538e-08	-0.374247	0.028	0.127	0.00217791	Downregulated	HT vs HW	Endothelial cells
Msl2	8.92887e-08	-0.174038	0.102	0.284	0.00219847	Stable	HT vs HW	Endothelial cells
S100a10	8.95788e-08	-0.356638	0.025	0.119	0.00220561	Downregulated	HT vs HW	Endothelial cells
Furin	9.05273e-08	-0.240592	0.062	0.201	0.00222896	Stable	HT vs HW	Endothelial cells
Sfxn3	9.282e-08	-0.222847	0.034	0.142	0.00228541	Stable	HT vs HW	Endothelial cells
Abcc1	9.34356e-08	-0.358836	0.045	0.164	0.00230057	Downregulated	HT vs HW	Endothelial cells
Atg3	9.43129e-08	-0.10112	0.098	0.276	0.00232217	Stable	HT vs HW	Endothelial cells
Arpc1a	9.6216e-08	-0.199049	0.069	0.216	0.00236903	Stable	HT vs HW	Endothelial cells
Ammecr1l	9.7501e-08	-0.229039	0.095	0.269	0.00240067	Stable	HT vs HW	Endothelial cells
Ankrd40	9.76908e-08	-0.202667	0.034	0.142	0.00240534	Stable	HT vs HW	Endothelial cells
Ppm1b	1.01269e-07	-0.294358	0.101	0.276	0.00249344	Downregulated	HT vs HW	Endothelial cells
Tfg	1.03219e-07	-0.258678	0.028	0.127	0.00254146	Downregulated	HT vs HW	Endothelial cells
Ncln	1.03813e-07	-0.249929	0.031	0.134	0.00255609	Stable	HT vs HW	Endothelial cells
Mafg	1.04042e-07	-0.323649	0.055	0.187	0.00256172	Downregulated	HT vs HW	Endothelial cells
Tmx4	1.04571e-07	-0.20306	0.034	0.142	0.00257476	Stable	HT vs HW	Endothelial cells
Ier3ip1	1.0578e-07	-0.222245	0.004	0.052	0.00260452	Stable	HT vs HW	Endothelial cells
Dmxl2	1.0704e-07	-0.176253	0.012	0.082	0.00263554	Stable	HT vs HW	Endothelial cells
Zfp110	1.08335e-07	-0.232034	0.062	0.201	0.00266742	Stable	HT vs HW	Endothelial cells
Rab3il1	1.08723e-07	-0.128689	0.004	0.052	0.00267697	Stable	HT vs HW	Endothelial cells
Tbcb	1.10143e-07	-0.382505	0.02	0.104	0.00271195	Downregulated	HT vs HW	Endothelial cells
Casp1	1.112e-07	-0.198239	0.012	0.082	0.00273798	Stable	HT vs HW	Endothelial cells
Mfsd14b	1.11878e-07	-0.258991	0.08	0.239	0.00275467	Downregulated	HT vs HW	Endothelial cells
Fam98a	1.1231e-07	-0.185268	0.025	0.119	0.00276529	Stable	HT vs HW	Endothelial cells
Mmd	1.13803e-07	-0.331845	0.004	0.052	0.00280206	Downregulated	HT vs HW	Endothelial cells
Camk2d	1.15472e-07	-0.539827	0.506	0.769	0.00284315	Downregulated	HT vs HW	Endothelial cells
Setd7	1.16237e-07	-0.0857904	0.145	0.366	0.00286198	Stable	HT vs HW	Endothelial cells
Pkp4	1.1979e-07	1.09987	0.682	0.701	0.00294947	Upregulated	HT vs HW	Endothelial cells
Hnrnpab	1.20464e-07	-0.267567	0.039	0.149	0.00296607	Downregulated	HT vs HW	Endothelial cells
Clca3a1	1.21729e-07	-0.405948	0.023	0.112	0.0029972	Downregulated	HT vs HW	Endothelial cells
Nucb2	1.22078e-07	-0.255153	0.052	0.179	0.0030058	Downregulated	HT vs HW	Endothelial cells
Rhbdf1	1.22233e-07	-0.256238	0.01	0.075	0.00300962	Downregulated	HT vs HW	Endothelial cells
Ctnnb1	1.22322e-07	-0.263113	0.243	0.53	0.0030118	Downregulated	HT vs HW	Endothelial cells
Tmem205	1.22414e-07	-0.11868	0.004	0.052	0.00301407	Stable	HT vs HW	Endothelial cells
Gspt1	1.23973e-07	-0.193193	0.103	0.284	0.00305246	Stable	HT vs HW	Endothelial cells
Cenpb	1.24254e-07	-0.256978	0.02	0.104	0.00305938	Downregulated	HT vs HW	Endothelial cells
Slc35b2	1.25231e-07	-0.15209	0.004	0.052	0.00308344	Stable	HT vs HW	Endothelial cells
Ggnbp2	1.25819e-07	-0.188519	0.217	0.485	0.00309792	Stable	HT vs HW	Endothelial cells
Rnf145	1.2628e-07	-0.184593	0.081	0.239	0.00310927	Stable	HT vs HW	Endothelial cells
Fam57a	1.27243e-07	-0.227119	0.017	0.097	0.00313297	Stable	HT vs HW	Endothelial cells
Tnpo3	1.28049e-07	-0.0831171	0.178	0.425	0.00315283	Stable	HT vs HW	Endothelial cells
Hrct1	1.30592e-07	-0.41317	0.029	0.127	0.00321543	Downregulated	HT vs HW	Endothelial cells
Myct1	1.31155e-07	-0.0847136	0.131	0.336	0.0032293	Stable	HT vs HW	Endothelial cells
Phkb	1.31596e-07	-0.3578	0.179	0.41	0.00324017	Downregulated	HT vs HW	Endothelial cells
Aftph	1.31653e-07	-0.224385	0.141	0.351	0.00324156	Stable	HT vs HW	Endothelial cells
Mlkl	1.34242e-07	-0.153615	0.031	0.134	0.00330532	Stable	HT vs HW	Endothelial cells
Col1a1	1.35297e-07	-0.572973	0.01	0.075	0.00333129	Downregulated	HT vs HW	Endothelial cells
Rab11fip3	1.36079e-07	-0.0574896	0.076	0.231	0.00335053	Stable	HT vs HW	Endothelial cells
Gnaq	1.36136e-07	-0.484389	0.62	0.873	0.00335194	Downregulated	HT vs HW	Endothelial cells
Nat9	1.39003e-07	-0.182651	0.01	0.075	0.00342254	Stable	HT vs HW	Endothelial cells
Tsn	1.40885e-07	-0.331506	0.046	0.164	0.00346887	Downregulated	HT vs HW	Endothelial cells
Lrp6	1.41794e-07	-0.351891	0.181	0.418	0.00349126	Downregulated	HT vs HW	Endothelial cells
Rps18	1.42745e-07	-0.321781	0.032	0.134	0.00351466	Downregulated	HT vs HW	Endothelial cells
Rad54l2	1.43058e-07	-0.119857	0.088	0.254	0.00352237	Stable	HT vs HW	Endothelial cells
Gipc1	1.43774e-07	-0.247596	0.01	0.075	0.00354	Stable	HT vs HW	Endothelial cells
Vcpip1	1.43798e-07	-0.361874	0.064	0.201	0.00354058	Downregulated	HT vs HW	Endothelial cells
Atg4c	1.44296e-07	-0.339562	0.032	0.134	0.00355287	Downregulated	HT vs HW	Endothelial cells
Taok2	1.4463e-07	-0.106446	0.155	0.381	0.00356109	Stable	HT vs HW	Endothelial cells
Gbe1	1.45864e-07	-0.328928	0.032	0.134	0.00359147	Downregulated	HT vs HW	Endothelial cells
Vamp2	1.48318e-07	-0.247876	0.039	0.149	0.00365189	Stable	HT vs HW	Endothelial cells
Pgp	1.48703e-07	-0.291179	0.01	0.075	0.00366136	Downregulated	HT vs HW	Endothelial cells
Hsf1	1.54717e-07	-0.237865	0.039	0.149	0.00380943	Stable	HT vs HW	Endothelial cells
Igf1	1.55488e-07	-0.250183	0.008	0.067	0.00382844	Downregulated	HT vs HW	Endothelial cells
Ercc4	1.56002e-07	-0.360111	0.029	0.127	0.00384108	Downregulated	HT vs HW	Endothelial cells
Mocs2	1.59055e-07	-0.198535	0.01	0.075	0.00391625	Stable	HT vs HW	Endothelial cells
Fgd6	1.5979e-07	-0.100487	0.085	0.246	0.00393435	Stable	HT vs HW	Endothelial cells
Lonp1	1.61208e-07	-0.176039	0.01	0.075	0.00396925	Stable	HT vs HW	Endothelial cells
Chmp2a	1.6125e-07	-0.336025	0.026	0.119	0.00397029	Downregulated	HT vs HW	Endothelial cells
Sdhc	1.61692e-07	-0.221073	0.015	0.09	0.00398119	Stable	HT vs HW	Endothelial cells
Sertad1	1.62294e-07	-0.1765	0.01	0.075	0.00399601	Stable	HT vs HW	Endothelial cells
Vegfa	1.62294e-07	-0.0946692	0.01	0.075	0.00399601	Stable	HT vs HW	Endothelial cells
Cisd1	1.62433e-07	-0.223661	0.008	0.067	0.00399942	Stable	HT vs HW	Endothelial cells
Cdk2ap2	1.64814e-07	-0.369919	0.008	0.067	0.00405804	Downregulated	HT vs HW	Endothelial cells
Gm39822	1.66311e-07	-0.198264	0.02	0.104	0.00409491	Stable	HT vs HW	Endothelial cells
Agfg1	1.66638e-07	-0.222754	0.147	0.358	0.00410297	Stable	HT vs HW	Endothelial cells
Shank3	1.66743e-07	0.984308	0.677	0.642	0.00410556	Upregulated	HT vs HW	Endothelial cells
Slc30a1	1.67602e-07	-0.375998	0.029	0.127	0.00412669	Downregulated	HT vs HW	Endothelial cells
Oxct1	1.68915e-07	-0.149936	0.02	0.104	0.00415903	Stable	HT vs HW	Endothelial cells
Ist1	1.70017e-07	-0.157596	0.063	0.201	0.00418615	Stable	HT vs HW	Endothelial cells
Ighm	1.72539e-07	-0.282438	0.006	0.06	0.00424825	Downregulated	HT vs HW	Endothelial cells
Slc41a2	1.72539e-07	-0.128112	0.006	0.06	0.00424825	Stable	HT vs HW	Endothelial cells
Zc2hc1a	1.73769e-07	-0.211977	0.078	0.231	0.00427854	Stable	HT vs HW	Endothelial cells
Oat	1.73923e-07	-0.18022	0.006	0.06	0.00428233	Stable	HT vs HW	Endothelial cells
Azi2	1.76661e-07	-0.219015	0.078	0.231	0.00434975	Stable	HT vs HW	Endothelial cells
Agl	1.76881e-07	-0.442962	0.015	0.09	0.00435517	Downregulated	HT vs HW	Endothelial cells
Gstz1	1.77233e-07	-0.142865	0.008	0.067	0.00436382	Stable	HT vs HW	Endothelial cells
Nipal2	1.77233e-07	-0.20959	0.008	0.067	0.00436382	Stable	HT vs HW	Endothelial cells
Alg5	1.7814e-07	-0.145886	0.006	0.06	0.00438617	Stable	HT vs HW	Endothelial cells
Rbm8a	1.7836e-07	-0.220257	0.023	0.112	0.00439159	Stable	HT vs HW	Endothelial cells
Gpr107	1.78851e-07	-0.190379	0.126	0.321	0.00440367	Stable	HT vs HW	Endothelial cells
Scp2	1.79568e-07	-0.126665	0.006	0.06	0.00442133	Stable	HT vs HW	Endothelial cells
Vamp5	1.81351e-07	0.0351303	0.122	0.321	0.00446522	Stable	HT vs HW	Endothelial cells
Fancl	1.83386e-07	-0.284333	0.075	0.224	0.00451534	Downregulated	HT vs HW	Endothelial cells
Runx1t1	1.83666e-07	-0.307838	0.075	0.224	0.00452222	Downregulated	HT vs HW	Endothelial cells
Sorbs3	1.84476e-07	-0.126979	0.108	0.291	0.00454217	Stable	HT vs HW	Endothelial cells
Parp12	1.84873e-07	-0.0376718	0.095	0.269	0.00455195	Stable	HT vs HW	Endothelial cells
Osbp	1.86354e-07	-0.122395	0.073	0.224	0.00458841	Stable	HT vs HW	Endothelial cells
C1s1	1.86459e-07	-0.218275	0.008	0.067	0.004591	Stable	HT vs HW	Endothelial cells
Smurf2	1.87152e-07	-0.275958	0.358	0.701	0.00460806	Downregulated	HT vs HW	Endothelial cells
Chrm3	1.88369e-07	-0.674794	0.074	0.216	0.00463803	Downregulated	HT vs HW	Endothelial cells
Lyrm9	1.88369e-07	-0.111663	0.006	0.06	0.00463803	Stable	HT vs HW	Endothelial cells
Abl2	1.88613e-07	-0.212958	0.176	0.41	0.00464404	Stable	HT vs HW	Endothelial cells
Sec61b	1.89876e-07	-0.144029	0.006	0.06	0.00467514	Stable	HT vs HW	Endothelial cells
Prkag1	1.90675e-07	-0.116642	0.074	0.224	0.00469481	Stable	HT vs HW	Endothelial cells
Xpnpep1	1.91255e-07	-0.313084	0.099	0.269	0.00470909	Downregulated	HT vs HW	Endothelial cells
Rrp1	1.92881e-07	-0.166747	0.023	0.112	0.00474912	Stable	HT vs HW	Endothelial cells
Gm14636	1.93445e-07	-0.241775	0.015	0.09	0.00476301	Stable	HT vs HW	Endothelial cells
Eif1ax	1.93826e-07	-0.166755	0.023	0.112	0.00477238	Stable	HT vs HW	Endothelial cells
Mindy1	1.94537e-07	-0.325787	0.068	0.209	0.00478988	Downregulated	HT vs HW	Endothelial cells
Cpped1	1.95512e-07	-0.137161	0.082	0.239	0.00481391	Stable	HT vs HW	Endothelial cells
Sestd1	1.99399e-07	-0.210656	0.075	0.224	0.0049096	Stable	HT vs HW	Endothelial cells
Arf6	2.00449e-07	-0.138276	0.008	0.067	0.00493547	Stable	HT vs HW	Endothelial cells
Snrpb	2.04361e-07	-0.254636	0.05	0.172	0.00503179	Downregulated	HT vs HW	Endothelial cells
Golga2	2.10427e-07	-0.126598	0.035	0.142	0.00518114	Stable	HT vs HW	Endothelial cells
Golga3	2.19087e-07	-0.185974	0.067	0.209	0.00539435	Stable	HT vs HW	Endothelial cells
Baz1b	2.2093e-07	-0.0544932	0.176	0.418	0.00543974	Stable	HT vs HW	Endothelial cells
Abhd2	2.21454e-07	-0.0703265	0.111	0.299	0.00545263	Stable	HT vs HW	Endothelial cells
Gabbr1	2.22068e-07	-0.122292	0.097	0.269	0.00546776	Stable	HT vs HW	Endothelial cells
Dysf	2.24792e-07	1.23171	0.539	0.41	0.00553483	Upregulated	HT vs HW	Endothelial cells
Klc1	2.26168e-07	-0.0745256	0.183	0.433	0.00556872	Stable	HT vs HW	Endothelial cells
Gna14	2.2967e-07	-0.593679	0.045	0.157	0.00565494	Downregulated	HT vs HW	Endothelial cells
Edc4	2.31776e-07	-0.286626	0.04	0.149	0.00570679	Downregulated	HT vs HW	Endothelial cells
Pinx1	2.31864e-07	-0.361593	0.036	0.142	0.00570896	Downregulated	HT vs HW	Endothelial cells
Bbip1	2.33836e-07	-0.03739	0.088	0.254	0.00575751	Stable	HT vs HW	Endothelial cells
Rusc2	2.37821e-07	-0.388955	0.127	0.313	0.00585563	Downregulated	HT vs HW	Endothelial cells
Scarb2	2.39875e-07	-0.221796	0.11	0.291	0.0059062	Stable	HT vs HW	Endothelial cells
Als2cl	2.42199e-07	-0.163781	0.13	0.328	0.00596343	Stable	HT vs HW	Endothelial cells
2900026A02Rik	2.43149e-07	-0.290309	0.353	0.672	0.0059868	Downregulated	HT vs HW	Endothelial cells
Irgm2	2.45381e-07	-0.196992	0.075	0.224	0.00604177	Stable	HT vs HW	Endothelial cells
Tomm20	2.46962e-07	-0.279633	0.013	0.082	0.0060807	Downregulated	HT vs HW	Endothelial cells
Atp8b2	2.53027e-07	-0.262248	0.047	0.164	0.00623003	Downregulated	HT vs HW	Endothelial cells
Clic4	2.59363e-07	-0.523523	0.343	0.627	0.00638604	Downregulated	HT vs HW	Endothelial cells
Matr3	2.60416e-07	-0.0959234	0.182	0.425	0.00641196	Stable	HT vs HW	Endothelial cells
Anxa6	2.6396e-07	-0.181583	0.013	0.082	0.00649923	Stable	HT vs HW	Endothelial cells
Gpr160	2.67335e-07	1.34816	0.248	0.052	0.00658233	Upregulated	HT vs HW	Endothelial cells
Zbtb4	2.68105e-07	-0.266159	0.138	0.336	0.00660129	Downregulated	HT vs HW	Endothelial cells
Lcor	2.72521e-07	-0.106223	0.239	0.53	0.00671001	Stable	HT vs HW	Endothelial cells
Sh3pxd2b	2.79695e-07	-0.274191	0.018	0.097	0.00688664	Downregulated	HT vs HW	Endothelial cells
Tex264	2.82086e-07	-0.267421	0.013	0.082	0.00694552	Downregulated	HT vs HW	Endothelial cells
Bcas2	2.88637e-07	-0.301405	0.027	0.119	0.00710681	Downregulated	HT vs HW	Endothelial cells
Naa40	2.91726e-07	-0.312393	0.033	0.134	0.00718287	Downregulated	HT vs HW	Endothelial cells
Peg13	2.95761e-07	-0.165493	0.018	0.097	0.00728224	Stable	HT vs HW	Endothelial cells
Med26	2.9764e-07	-0.21313	0.061	0.194	0.0073285	Stable	HT vs HW	Endothelial cells
Tmem189	2.98702e-07	-0.209424	0.013	0.082	0.00735465	Stable	HT vs HW	Endothelial cells
Iqsec1	3.07888e-07	-0.268887	0.08	0.231	0.00758083	Downregulated	HT vs HW	Endothelial cells
Actr3	3.17076e-07	-0.200751	0.182	0.418	0.00780704	Stable	HT vs HW	Endothelial cells
Rad23b	3.17594e-07	-0.0419677	0.109	0.291	0.00781981	Stable	HT vs HW	Endothelial cells
Slc25a16	3.20479e-07	-0.268151	0.021	0.104	0.00789085	Downregulated	HT vs HW	Endothelial cells
Adpgk	3.22979e-07	-0.211816	0.013	0.082	0.00795239	Stable	HT vs HW	Endothelial cells
Pdcl3	3.24499e-07	-0.230673	0.033	0.134	0.00798982	Stable	HT vs HW	Endothelial cells
Zswim6	3.2996e-07	-0.442696	0.348	0.657	0.00812428	Downregulated	HT vs HW	Endothelial cells
Atp6v1d	3.3292e-07	-0.172594	0.036	0.142	0.00819716	Stable	HT vs HW	Endothelial cells
Ccdc43	3.33814e-07	-0.152565	0.013	0.082	0.00821917	Stable	HT vs HW	Endothelial cells
Tbc1d4	3.35273e-07	-0.260924	0.066	0.201	0.00825508	Downregulated	HT vs HW	Endothelial cells
2610035D17Rik	3.38909e-07	-0.0626984	0.176	0.41	0.00834461	Stable	HT vs HW	Endothelial cells
Rtn3	3.42337e-07	-0.250779	0.31	0.627	0.00842902	Downregulated	HT vs HW	Endothelial cells
Gnb2	3.46216e-07	-0.289776	0.07	0.209	0.00852453	Downregulated	HT vs HW	Endothelial cells
Cmc1	3.48845e-07	-0.233501	0.03	0.127	0.00858927	Stable	HT vs HW	Endothelial cells
Prim2	3.50478e-07	-0.202959	0.044	0.157	0.00862946	Stable	HT vs HW	Endothelial cells
Snx3	3.52025e-07	-0.252122	0.113	0.291	0.00866755	Downregulated	HT vs HW	Endothelial cells
Tmem65	3.52787e-07	-0.107978	0.102	0.276	0.00868631	Stable	HT vs HW	Endothelial cells
Cmtm6	3.53128e-07	-0.227641	0.041	0.149	0.00869473	Stable	HT vs HW	Endothelial cells
Cep170	3.582e-07	-0.133257	0.155	0.373	0.0088196	Stable	HT vs HW	Endothelial cells
Eif3a	3.61086e-07	-0.125663	0.2	0.455	0.00889065	Stable	HT vs HW	Endothelial cells
Sp1	3.63236e-07	-0.0705063	0.098	0.269	0.00894359	Stable	HT vs HW	Endothelial cells
H2afy	3.63593e-07	-0.277383	0.096	0.261	0.00895239	Downregulated	HT vs HW	Endothelial cells
Ccser1	3.72004e-07	1.44692	0.43	0.239	0.00915948	Upregulated	HT vs HW	Endothelial cells
Zwint	3.73777e-07	-0.229666	0.051	0.172	0.00920315	Stable	HT vs HW	Endothelial cells
Tnnt3	3.76713e-07	-1.1764	0.003	0.045	0.00927544	Downregulated	HT vs HW	Endothelial cells
Snap23	3.78256e-07	-0.194033	0.127	0.313	0.00931342	Stable	HT vs HW	Endothelial cells
St3gal1	3.80147e-07	-0.231372	0.048	0.164	0.00935998	Stable	HT vs HW	Endothelial cells
Mrpl51	3.84079e-07	-0.175095	0.003	0.045	0.00945679	Stable	HT vs HW	Endothelial cells
Gng5	3.84335e-07	-0.308669	0.011	0.075	0.0094631	Downregulated	HT vs HW	Endothelial cells
Mdga2	3.8441e-07	-0.52	0.042	0.149	0.00946494	Downregulated	HT vs HW	Endothelial cells
Esyt1	3.91225e-07	-0.308168	0.048	0.164	0.00963275	Downregulated	HT vs HW	Endothelial cells
Mafb	3.95388e-07	-0.206724	0.003	0.045	0.00973524	Stable	HT vs HW	Endothelial cells
Slc4a3	3.95388e-07	-0.139556	0.003	0.045	0.00973524	Stable	HT vs HW	Endothelial cells
Morc4	3.99229e-07	-0.188783	0.003	0.045	0.00982981	Stable	HT vs HW	Endothelial cells
Snx19	4.00386e-07	-0.144858	0.058	0.187	0.0098583	Stable	HT vs HW	Endothelial cells
Pithd1	4.03105e-07	-0.21016	0.003	0.045	0.00992526	Stable	HT vs HW	Endothelial cells
mt-Co3	4.03105e-07	-0.160433	0.003	0.045	0.00992526	Stable	HT vs HW	Endothelial cells
Art3	4.07018e-07	-0.0886398	0.003	0.045	0.0100216	Stable	HT vs HW	Endothelial cells
Gm17382	4.07018e-07	-0.191686	0.003	0.045	0.0100216	Stable	HT vs HW	Endothelial cells
Ndufs6	4.07018e-07	-0.0900949	0.003	0.045	0.0100216	Stable	HT vs HW	Endothelial cells
Gm26917	4.08173e-07	-0.670552	0.439	0.724	0.01005	Downregulated	HT vs HW	Endothelial cells
Zfp53	4.08265e-07	-0.147517	0.044	0.157	0.0100523	Stable	HT vs HW	Endothelial cells
Ice1	4.09022e-07	0.00605153	0.112	0.299	0.0100709	Stable	HT vs HW	Endothelial cells
2610507B11Rik	4.09984e-07	-0.149757	0.12	0.306	0.0100946	Stable	HT vs HW	Endothelial cells
Senp1	4.10756e-07	-0.0973754	0.103	0.276	0.0101136	Stable	HT vs HW	Endothelial cells
Dgcr6	4.10968e-07	-0.159423	0.003	0.045	0.0101188	Stable	HT vs HW	Endothelial cells
Mttp	4.10968e-07	-0.116847	0.003	0.045	0.0101188	Stable	HT vs HW	Endothelial cells
Crk	4.11473e-07	-0.0744825	0.214	0.478	0.0101313	Stable	HT vs HW	Endothelial cells
Dyrk2	4.11557e-07	-0.294275	0.016	0.09	0.0101333	Downregulated	HT vs HW	Endothelial cells
Fntb	4.11698e-07	-0.23499	0.041	0.149	0.0101368	Stable	HT vs HW	Endothelial cells
Jagn1	4.12955e-07	-0.123424	0.003	0.045	0.0101678	Stable	HT vs HW	Endothelial cells
Echdc1	4.18978e-07	-0.109019	0.003	0.045	0.0103161	Stable	HT vs HW	Endothelial cells
Fzd8	4.18978e-07	-0.142395	0.003	0.045	0.0103161	Stable	HT vs HW	Endothelial cells
Ilvbl	4.18978e-07	-0.0992579	0.003	0.045	0.0103161	Stable	HT vs HW	Endothelial cells
Tmem117	4.18978e-07	-0.15935	0.003	0.045	0.0103161	Stable	HT vs HW	Endothelial cells
Zfp65	4.18978e-07	-0.0824985	0.003	0.045	0.0103161	Stable	HT vs HW	Endothelial cells
Eid1	4.20742e-07	-0.317501	0.016	0.09	0.0103595	Downregulated	HT vs HW	Endothelial cells
Mrps24	4.28203e-07	-0.342058	0.011	0.075	0.0105432	Downregulated	HT vs HW	Endothelial cells
Stau2	4.31312e-07	-0.221297	0.016	0.09	0.0106198	Stable	HT vs HW	Endothelial cells
Sp2	4.32507e-07	-0.186054	0.048	0.164	0.0106492	Stable	HT vs HW	Endothelial cells
Nek1	4.32883e-07	-0.175117	0.081	0.231	0.0106585	Stable	HT vs HW	Endothelial cells
Selenom	4.37295e-07	-0.253693	0.016	0.09	0.0107671	Downregulated	HT vs HW	Endothelial cells
Myl12b	4.40948e-07	-0.204018	0.149	0.358	0.010857	Stable	HT vs HW	Endothelial cells
Mex3c	4.43466e-07	-0.246857	0.048	0.164	0.010919	Stable	HT vs HW	Endothelial cells
Sec62	4.45656e-07	-0.30236	0.148	0.351	0.0109729	Downregulated	HT vs HW	Endothelial cells
Blvra	4.47637e-07	-0.188973	0.011	0.075	0.0110217	Stable	HT vs HW	Endothelial cells
Prdm5	4.51214e-07	-0.25361	0.098	0.261	0.0111098	Downregulated	HT vs HW	Endothelial cells
Mfsd11	4.53344e-07	-0.191575	0.011	0.075	0.0111622	Stable	HT vs HW	Endothelial cells
Ube2w	4.53715e-07	-0.194088	0.13	0.321	0.0111714	Stable	HT vs HW	Endothelial cells
Rcn2	4.60083e-07	-0.253106	0.055	0.179	0.0113282	Downregulated	HT vs HW	Endothelial cells
Rybp	4.60413e-07	-0.313161	0.095	0.254	0.0113363	Downregulated	HT vs HW	Endothelial cells
Supt5	4.65192e-07	-0.172093	0.088	0.246	0.011454	Stable	HT vs HW	Endothelial cells
Add1	4.66832e-07	-0.00440486	0.204	0.463	0.0114943	Stable	HT vs HW	Endothelial cells
Adck2	4.69718e-07	-0.257201	0.016	0.09	0.0115654	Downregulated	HT vs HW	Endothelial cells
Men1	4.73877e-07	-0.152632	0.011	0.075	0.0116678	Stable	HT vs HW	Endothelial cells
Lrp12	4.80682e-07	-0.313006	0.019	0.097	0.0118353	Downregulated	HT vs HW	Endothelial cells
Cfl1	4.90579e-07	-0.263164	0.034	0.134	0.012079	Downregulated	HT vs HW	Endothelial cells
Gxylt2	4.90606e-07	-0.351474	0.049	0.164	0.0120797	Downregulated	HT vs HW	Endothelial cells
2310002F09Rik	4.94609e-07	-0.381459	0.025	0.112	0.0121783	Downregulated	HT vs HW	Endothelial cells
Kif3b	4.94783e-07	-0.141974	0.051	0.172	0.0121825	Stable	HT vs HW	Endothelial cells
Hoxb9	4.95305e-07	-0.122804	0.011	0.075	0.0121954	Stable	HT vs HW	Endothelial cells
Sav1	4.98485e-07	-0.18934	0.109	0.284	0.0122737	Stable	HT vs HW	Endothelial cells
A230072C01Rik	4.98953e-07	-0.197078	0.016	0.09	0.0122852	Stable	HT vs HW	Endothelial cells
Dazap2	5.05105e-07	-0.440089	0.035	0.134	0.0124367	Downregulated	HT vs HW	Endothelial cells
Slc12a4	5.08868e-07	-0.320096	0.052	0.172	0.0125293	Downregulated	HT vs HW	Endothelial cells
Elp3	5.10622e-07	-0.31207	0.052	0.172	0.0125725	Downregulated	HT vs HW	Endothelial cells
Pcdh9	5.13702e-07	-0.339649	0.028	0.119	0.0126484	Downregulated	HT vs HW	Endothelial cells
Tef	5.14179e-07	-0.313079	0.099	0.261	0.0126601	Downregulated	HT vs HW	Endothelial cells
Mlph	5.14413e-07	-0.0962828	0.011	0.075	0.0126659	Stable	HT vs HW	Endothelial cells
Klhdc2	5.20369e-07	-0.245559	0.034	0.134	0.0128125	Stable	HT vs HW	Endothelial cells
Smad6	5.23087e-07	-0.281965	0.212	0.448	0.0128794	Downregulated	HT vs HW	Endothelial cells
Npm1	5.33157e-07	-0.12478	0.037	0.142	0.0131274	Stable	HT vs HW	Endothelial cells
Tdrd3	5.33819e-07	-0.146458	0.155	0.366	0.0131437	Stable	HT vs HW	Endothelial cells
Cyfip1	5.37284e-07	-0.112819	0.25	0.537	0.013229	Stable	HT vs HW	Endothelial cells
Ehd2	5.43883e-07	-0.278695	0.247	0.515	0.0133915	Downregulated	HT vs HW	Endothelial cells
Gtf2a2	5.44716e-07	-0.214655	0.066	0.201	0.013412	Stable	HT vs HW	Endothelial cells
Klf3	5.48568e-07	-0.17454	0.331	0.672	0.0135068	Stable	HT vs HW	Endothelial cells
Pwwp2b	5.52127e-07	-0.245612	0.019	0.097	0.0135945	Stable	HT vs HW	Endothelial cells
Rassf9	5.56542e-07	-0.308631	0.079	0.224	0.0137032	Downregulated	HT vs HW	Endothelial cells
Pros1	5.64017e-07	-0.245533	0.145	0.343	0.0138872	Stable	HT vs HW	Endothelial cells
9930104L06Rik	5.67946e-07	-0.279596	0.009	0.067	0.013984	Downregulated	HT vs HW	Endothelial cells
AI987944	5.7226e-07	-0.203736	0.019	0.097	0.0140902	Stable	HT vs HW	Endothelial cells
Oma1	5.72793e-07	-0.0346174	0.065	0.201	0.0141033	Stable	HT vs HW	Endothelial cells
Qdpr	5.76027e-07	-0.375735	0.014	0.082	0.0141829	Downregulated	HT vs HW	Endothelial cells
Bnip2	5.76553e-07	-0.212087	0.142	0.343	0.0141959	Stable	HT vs HW	Endothelial cells
Stx16	5.88491e-07	-0.112096	0.15	0.358	0.0144898	Stable	HT vs HW	Endothelial cells
Arl8b	5.88611e-07	-0.18417	0.066	0.201	0.0144928	Stable	HT vs HW	Endothelial cells
Timmdc1	5.90018e-07	-0.189135	0.034	0.134	0.0145274	Stable	HT vs HW	Endothelial cells
Cavin2	5.91996e-07	-0.43658	0.336	0.627	0.0145761	Downregulated	HT vs HW	Endothelial cells
Rcl1	5.93099e-07	-0.182372	0.019	0.097	0.0146033	Stable	HT vs HW	Endothelial cells
Afg3l2	6.02062e-07	-0.210118	0.034	0.134	0.014824	Stable	HT vs HW	Endothelial cells
Akap13	6.03183e-07	-0.402985	0.454	0.746	0.0148516	Downregulated	HT vs HW	Endothelial cells
Keap1	6.0372e-07	-0.141165	0.059	0.187	0.0148648	Stable	HT vs HW	Endothelial cells
Rp1	6.07716e-07	-0.2921	0.009	0.067	0.0149632	Downregulated	HT vs HW	Endothelial cells
Fbxl19	6.0843e-07	-0.16802	0.019	0.097	0.0149808	Stable	HT vs HW	Endothelial cells
Man1b1	6.09768e-07	-0.109588	0.055	0.179	0.0150137	Stable	HT vs HW	Endothelial cells
Tecpr2	6.13178e-07	-0.196725	0.074	0.216	0.0150977	Stable	HT vs HW	Endothelial cells
Stub1	6.15229e-07	-0.222453	0.022	0.104	0.0151482	Stable	HT vs HW	Endothelial cells
Epas1	6.1586e-07	-0.427426	0.579	0.851	0.0151637	Downregulated	HT vs HW	Endothelial cells
Slc36a1	6.15986e-07	-0.163539	0.009	0.067	0.0151668	Stable	HT vs HW	Endothelial cells
Thumpd1	6.15986e-07	-0.140824	0.009	0.067	0.0151668	Stable	HT vs HW	Endothelial cells
Col1a2	6.21183e-07	-0.664432	0.022	0.104	0.0152948	Downregulated	HT vs HW	Endothelial cells
Tmem33	6.21183e-07	-0.236393	0.022	0.104	0.0152948	Stable	HT vs HW	Endothelial cells
Ccnt1	6.23684e-07	-0.0508185	0.131	0.328	0.0153564	Stable	HT vs HW	Endothelial cells
Copb1	6.24886e-07	-0.288173	0.094	0.254	0.0153859	Downregulated	HT vs HW	Endothelial cells
Lpcat1	6.28517e-07	-0.231536	0.028	0.119	0.0154753	Stable	HT vs HW	Endothelial cells
Nudt9	6.33259e-07	-0.282069	0.022	0.104	0.0155921	Downregulated	HT vs HW	Endothelial cells
Dgcr2	6.33757e-07	-0.144766	0.019	0.097	0.0156044	Stable	HT vs HW	Endothelial cells
Ikbip	6.37139e-07	-0.209148	0.009	0.067	0.0156876	Stable	HT vs HW	Endothelial cells
Glrx2	6.38618e-07	-0.150312	0.019	0.097	0.015724	Stable	HT vs HW	Endothelial cells
Hsp90aa1	6.39292e-07	-0.150176	0.009	0.067	0.0157406	Stable	HT vs HW	Endothelial cells
Bcl2l1	6.43129e-07	-0.277064	0.268	0.545	0.0158351	Downregulated	HT vs HW	Endothelial cells
Pls3	6.44795e-07	-0.135008	0.303	0.612	0.0158761	Stable	HT vs HW	Endothelial cells
Gsk3a	6.52282e-07	-0.268325	0.028	0.119	0.0160605	Downregulated	HT vs HW	Endothelial cells
Mrps25	6.54454e-07	-0.245525	0.025	0.112	0.016114	Stable	HT vs HW	Endothelial cells
Sec14l2	6.54563e-07	-0.0912689	0.009	0.067	0.0161167	Stable	HT vs HW	Endothelial cells
Tet2	6.55636e-07	-0.132324	0.14	0.336	0.0161431	Stable	HT vs HW	Endothelial cells
Zmat1	6.61464e-07	-0.219439	0.042	0.149	0.0162866	Stable	HT vs HW	Endothelial cells
Coa3	6.62684e-07	-0.187557	0.005	0.052	0.0163166	Stable	HT vs HW	Endothelial cells
Trim46	6.63447e-07	-0.190464	0.009	0.067	0.0163354	Stable	HT vs HW	Endothelial cells
Wipf2	6.65433e-07	-0.0877521	0.09	0.246	0.0163843	Stable	HT vs HW	Endothelial cells
Bcap29	6.6583e-07	-0.188244	0.052	0.172	0.0163941	Stable	HT vs HW	Endothelial cells
Fli1	6.72473e-07	0.829083	0.784	0.821	0.0165576	Upregulated	HT vs HW	Endothelial cells
Ints6l	6.82846e-07	-0.212714	0.106	0.276	0.016813	Stable	HT vs HW	Endothelial cells
Elmod3	6.84852e-07	-0.170995	0.005	0.052	0.0168624	Stable	HT vs HW	Endothelial cells
Mettl1	6.86167e-07	-0.129536	0.009	0.067	0.0168948	Stable	HT vs HW	Endothelial cells
Timm13	6.96203e-07	-0.145905	0.005	0.052	0.0171419	Stable	HT vs HW	Endothelial cells
Tmem29	6.96203e-07	-0.129223	0.005	0.052	0.0171419	Stable	HT vs HW	Endothelial cells
Agtrap	6.9828e-07	-0.278932	0.014	0.082	0.0171931	Downregulated	HT vs HW	Endothelial cells
Uqcc2	7.01946e-07	-0.2137	0.005	0.052	0.0172833	Stable	HT vs HW	Endothelial cells
Anapc11	7.07037e-07	-0.176645	0.028	0.119	0.0174087	Stable	HT vs HW	Endothelial cells
Ccdc124	7.13569e-07	-0.16829	0.005	0.052	0.0175695	Stable	HT vs HW	Endothelial cells
Hoxb7	7.13569e-07	-0.0791385	0.005	0.052	0.0175695	Stable	HT vs HW	Endothelial cells
Coq9	7.19501e-07	-0.200368	0.007	0.06	0.0177155	Stable	HT vs HW	Endothelial cells
[truncated: 15,097 more rows]
