# Supplementary figures and images for: Tibetan tea consumption prevents obesity by modulating the cellular composition and metabolic reprogramming of white adipose tissue
Source: Royal Society of Chemistry journal article supplement (doi:10.1039/d3fo03506a), 2023-11-16

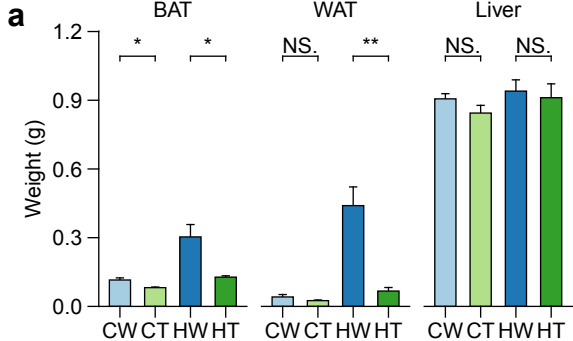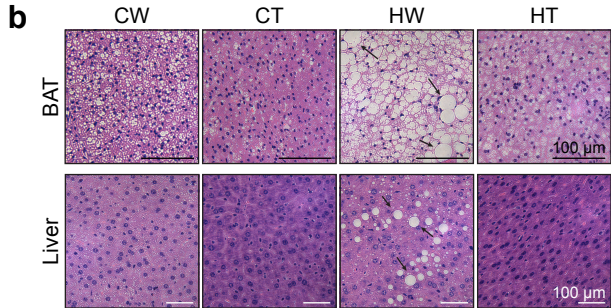

Supplement: d3fo03506a2.pdf [file d3fo03506a2.pdf]

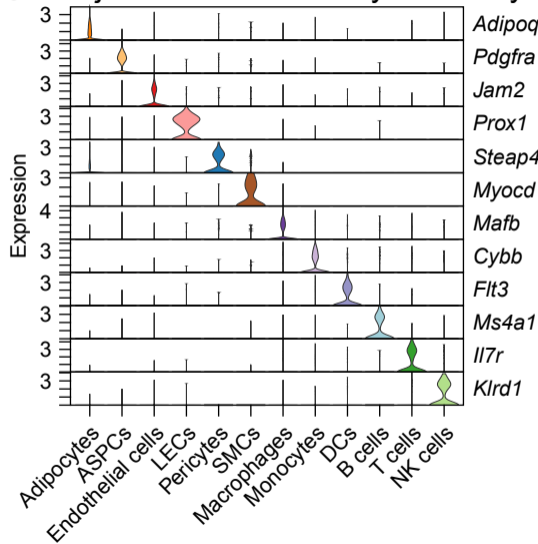

Phenotype-associated subpopulations

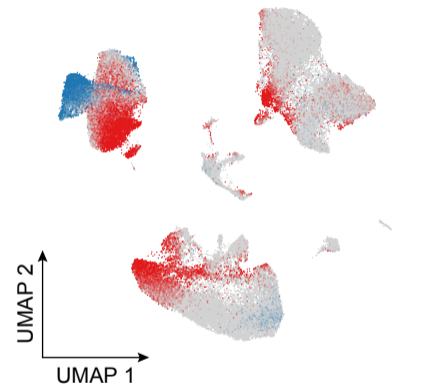

- Scissor+ cells (n = 12,104, 20.68%)
- Scissor- cells (n = 4,268, 7.29%)
- Background cells (n = 42,158, 72.03%)

**c**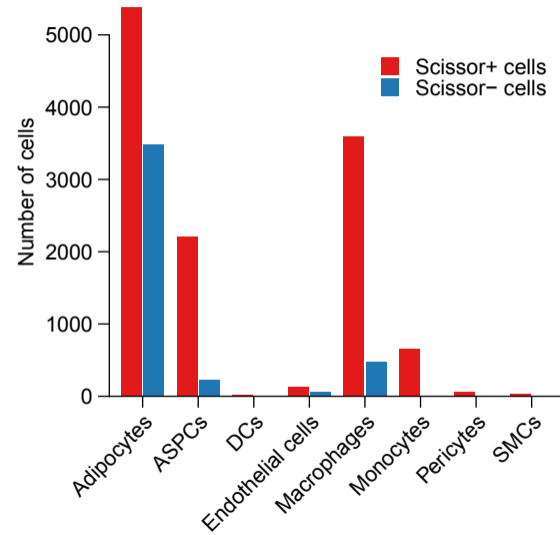

Supplement: d3fo03506a3.pdf [file d3fo03506a3.pdf]
